# Supplementary material for: Single-cell RNA sequencing and multiple bioinformatics methods to identify the immunity and ferroptosis-related biomarkers of SARS-CoV-2 infections to ischemic stroke
Source: Aging (Albany NY). 2023 Aug 21;15(16):8237–57. doi: 10.18632/aging.204966 (PMC10497002; doi:10.18632/aging.204966)
Supplement: Supplementary Figures [file aging-15-204966-s001.pdf]

## SUPPLEMENTARY FIGURES

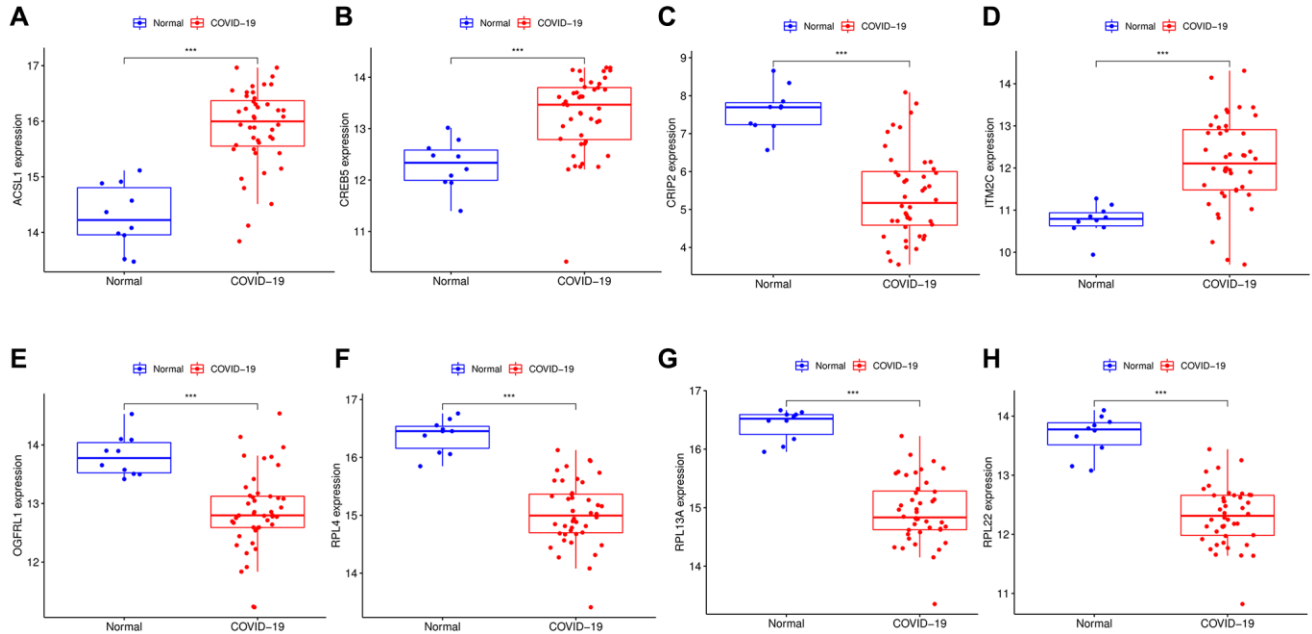

**Supplementary Figure 1. Expression of hub genes in COVID-19 train cohort GSE171110.** (A) The expression of ACSL1 in GSE171110. (B) The expression of CREB5 in GSE171110. (C) The expression of CRIP2 in GSE171110. (D) The expression of ITM2C in GSE171110. (E) The expression of OGFR1 in GSE171110. (F) The expression of RPL4 in GSE171110. (G) The expression of RPL13A in GSE171110. (H) The expression of RPL22 in GSE171110.

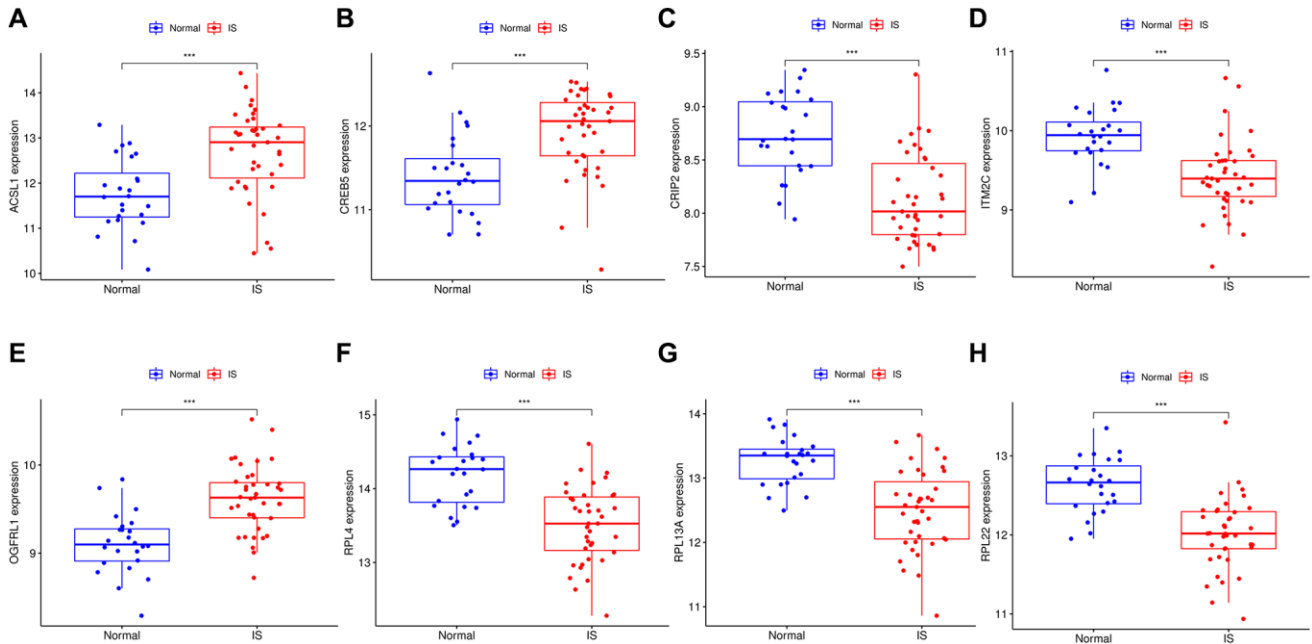

**Supplementary Figure 2. Expression of hub genes in IS train cohort GSE16561.** (A) The expression of ACSL1 in GSE16561. (B) The expression of CREB5 in GSE16561. (C) The expression of CRIP2 in GSE16561. (D) The expression of ITM2C in GSE16561. (E) The expression of OGFR1 in GSE16561. (F) The expression of RPL4 in GSE16561. (G) The expression of RPL13A in GSE16561. (H) The expression of RPL22 in GSE16561.

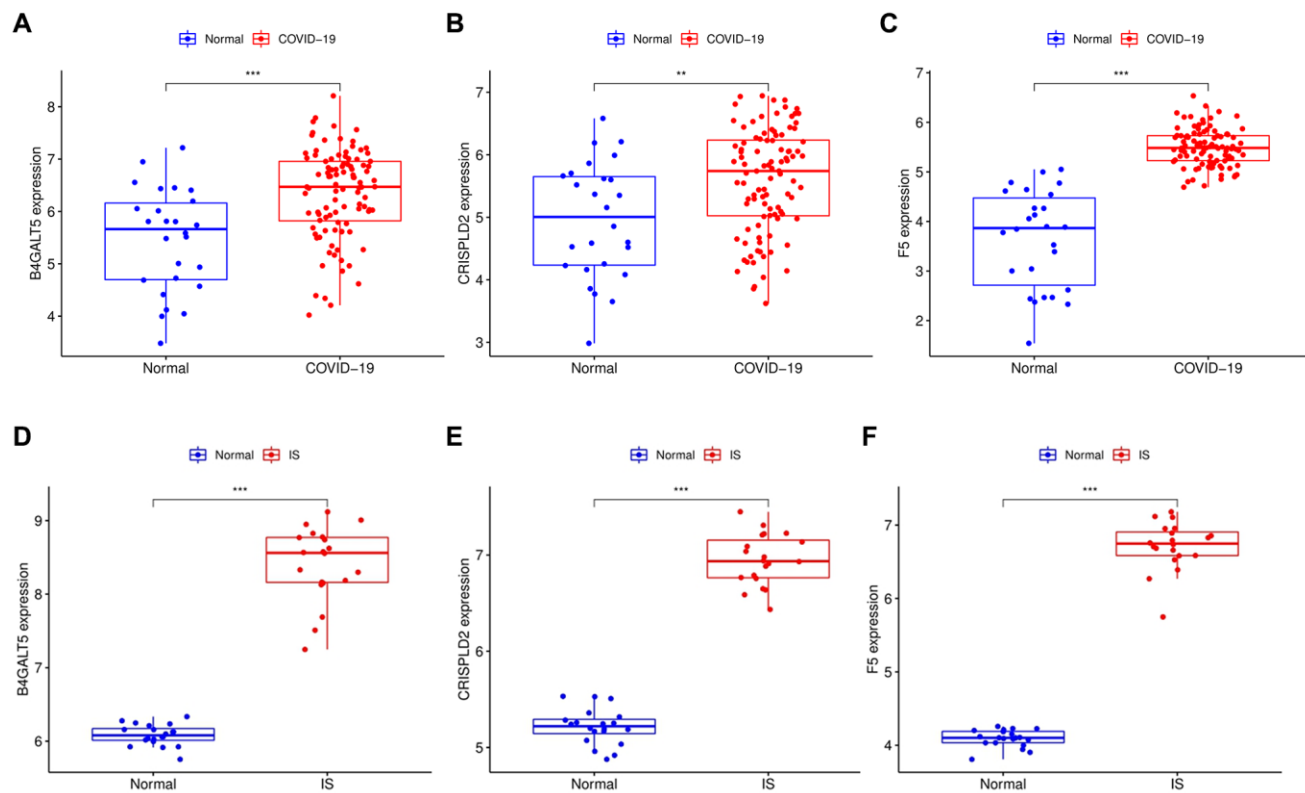

**Supplementary Figure 3. Expression of hub genes in COVID-19 validation cohort GSE157103 and IS validation cohort GSE22255. (A)** The expression of B4GALT5 in GSE157103. **(B)** The expression of CRISPLD2 in GSE157103. **(C)** The expression of F5 in GSE157103. **(D)** The expression of B4GALT5 in GSE22255. **(E)** The expression of CRISPLD2 in GSE22255. **(F)** The expression of F5 in GSE22255.

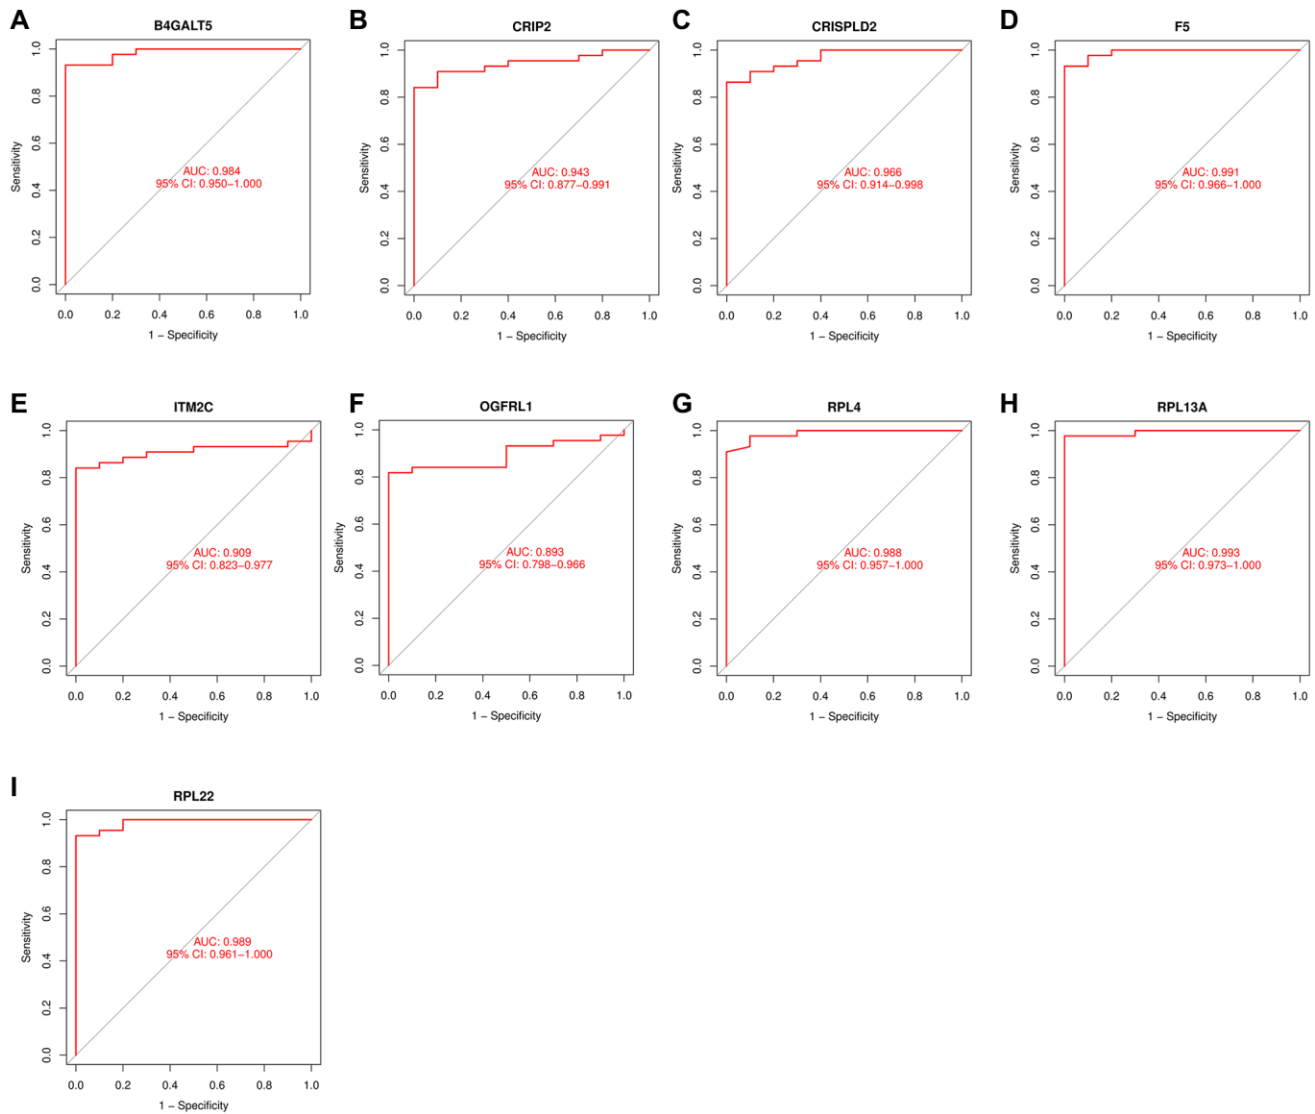

**Supplementary Figure 4. ROC curves for hub genes in COVID-19 train cohort GSE171110.** (A) The ROC curve of B4GALT5 in GSE171110. (B) The ROC curve of CRIP2 in GSE171110. (C) The ROC curve of CRISPLD2 in GSE171110. (D) The ROC curve of F5 in GSE171110. (E) The ROC curve of ITM2C in GSE171110. (F) The ROC curve of OGFR1 in GSE171110. (G) The ROC curve of RPL4 in GSE171110. (H) The ROC curve of RPL13A in GSE171110. (I) The ROC curve of RPL22 in GSE171110.

| Rank | Pert_iname  | Moa                     | Target name                                | Fdr_q_nlog10 | Norm_CS |
|------|-------------|-------------------------|--------------------------------------------|--------------|---------|
| 1    | ARRY-334543 | EGFR inhibitor          | ERBB2 EGFR ERBB4                           | 15.6536      | -1.9725 |
| 2    | BIX-02189   | MEK inhibitor           | MAP2K5 MAPK7                               | 15.6536      | -1.9445 |
| 3    | etoposide   | Topoisomerase inhibitor | TOP2A TOP2B CYP2E1 CYP3A5                  | 15.6536      | -1.9418 |
| 4    | SB-939      | HDAC inhibitor          | HDAC1 HDAC2 HDAC10 HDAC3 HDAC4 HDAC5 HDAC9 | 15.6536      | -1.9247 |
| 5    | cabazitaxel | Tubulin inhibitor       | CYP2C8 CYP3A5 SLCO1B3 TUBA4A TUBB TUBB1    | 15.6536      | -1.9246 |
| 6    | amsacrine   | Topoisomerase inhibitor | TOP2A KCNH2                                | 15.6536      | -1.906  |
| 7    | amsacrine   | Topoisomerase inhibitor | TOP2A KCNH2                                | 15.6536      | -1.9    |
| 8    | docetaxel   | Tubulin inhibitor       | TUBB BCL2 MAP2 MAP4 MAPT NR1I2 TUBB1       | 15.6536      | -1.8952 |
| 9    | teniposide  | Topoisomerase inhibitor | TOP2A CYP3A5 TOP2B                         | 15.6536      | -1.8803 |
| 10   | palbociclib | CDK inhibitor           | CDK4 CDK6 CCND3                            | 15.6536      | -1.8635 |

**Supplementary Figure 5. Potential drugs for COVID-19 predicted by CMAP database.**

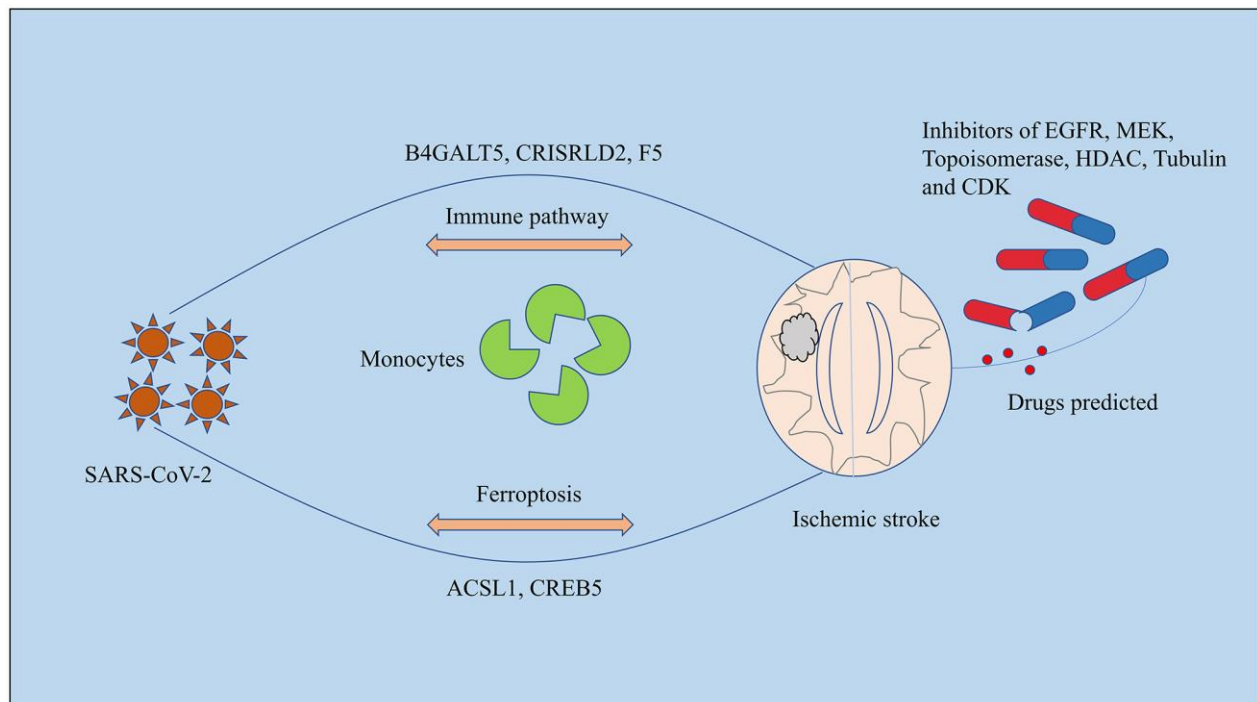

**Supplementary Figure 6. Schematic diagram of the research.**
