# Supplementary material for: Single-cell RNA sequencing and multiple bioinformatics methods to identify the immunity and ferroptosis-related biomarkers of SARS-CoV-2 infections to ischemic stroke
Source: Aging (Albany NY). 2023 Aug 21;15(16):8237–57. doi: 10.18632/aging.204966 (PMC10497002; doi:10.18632/aging.204966)
Supplement: Supplementary Tables [file aging-15-204966-s002.xlsx]

## Sheet: Supplementary Table 1
Supplementary Table 1. 728 ferroptosis-related genes downloaded from FerrDb.
Ferrrgene
PTGS2
CHAC1
SLC40A1
TF
TFRC
FTH1
GPX4
HSPB1
NFE2L2
GPX4
FTH1
RPL8
IREB2
ATP5MC3
CS
EMC2
ACSF2
NOX1
CYBB
NOX3
NOX4
NOX5
DUOX1
DUOX2
G6PD
PGD
VDAC2
PIK3CA
FLT3
SCP2
TP53
ACSL4
LPCAT3
NRAS
KRAS
HRAS
TF
TFRC
TFR2
SLC38A1
SLC1A5
GLS2
GOT1
CARS1
TP53
ALOX5
KEAP1
HMOX1
TP53
TP53
GLS2
ATG5
ATG7
NCOA4
TF
ALOX5
ALOX12
ALOX12B
ALOX15
ALOX15B
ALOXE3
PHKG2
TFRC
ACO1
IREB2
SLC38A1
GLS2
G6PDX
ULK1
ATG3
ATG4D
ATG5
BECN1
MAP1LC3A
GABARAPL2
GABARAPL1
ATG16L1
WIPI1
WIPI2
SNX4
ATG13
ULK2
NCOA4
ACSL4
TP53
SAT1
ALOX15
ACSL4
LPCAT3
ALOX15
ACSL4
KEAP1
EGFR
NOX4
MAPK3
MAPK1
BID
ACSL4
ZEB1
KEAP1
DPP4
ALOX15
ALOX12
CDKN2A
PEBP1
SOCS1
CDO1
MYB
HMOX1
MAPK8
MAPK9
MAPK1
MAPK3
SLC1A5
CHAC1
MAPK14
LINC00472
NOX4
GOT1
BECN1
PRKAA2
PRKAA1
ELAVL1
BAP1
TP53
ABCC1
ACSL4
MIR6852
ACVR1B
TGFBR1
BAP1
EPAS1
HILPDA
HIF1A
ALOX12
ACSL4
HMOX1
IFNG
ANO6
LPIN1
HMGB1
TNFAIP3
TLR4
NOX4
ATF3
ATM
YY1AP1
EGLN2
MIOX
TAFAZZIN
MTDH
IDH1
SIRT1
TAFAZZIN
BECN1
FBXW7
PANX1
DNAJB6
BACH1
ACSL4
LONP1
CD82
IL1B
CTSB
POR
CYB5R1
ELOVL5
FADS1
ALOX12
FBXW7
PTEN
NR1D1
NR1D2
TBK1
IL6
USP7
miR-182-5p
miR-378a-3p
CTSB
ACSL4
ATF4
BECN1
AQP3
AQP5
AQP8
LINC00618
IREB2
MT1DP
ACSL4
PEX10
KEAP1
AGPAT3
PEX12
CHP1
GPAT4
BRPF1
OSBPL9
INTS2
MMD
CYP4F8
MLLT1
TTPA
GRIA3
EPT1
POM121L12
LIG3
AEBP2
AGPS
CDCA3
PEX2
LPCAT3
PEX6
TIMM9
DCAF7
LCE2C
FAR1
PHF21A
SMAD7
LYRM1
AMN
PEX3
MTCH1
ZEB1
SIRT1
ACADSB
PVT1
hsa_circ_0008367
SLC39A14
NCOA4
MAP3K11
GSK3B
MAPK8
BRD7
TP53
SLC25A28
ACSL4
MFN2
ACSL4
SLC11A2
ZFAS1
SLC38A1
TSC1
PEBP1
TGFB1
SNCA
SIRT3
PRKAA2
TFRC
CGAS
STING1
HDDC3
MIR761
MDM2
MDM4
ALOX15
POR
MIR214
DLD
LONP1
ACSL4
BACH1
DNAJB6
WWTR1
SIRT1
ATM
PRKCA
LGMN
ACSL4
TP53
IFNG
SMPD1
MYCN
SLC11A2
IFNA1
IFNA2
IFNA4
IFNA5
IFNA6
IFNA7
IFNA8
IFNA10
IFNA13
IFNA14
IFNA16
IFNA17
IFNA21
SMG9
NR1D1
ACSL4
PPARG
TLR4
IL6
MIR335
ATF3
HMOX1
HMGB1
EPAS1
SNX5
PAQR3
MICU1
NOX4
TOR2A
MIR375
MAP3K14
SIRT3
CircKDM4C
MIR324
QSOX1
MIB2
CLTRN
KLF2
MIR5096
TFRC
HOTAIR
H19
FOXO4
ELAVL1
YTHDC2
DDR2
SLC39A7
TRIM46
ACSL1
KDM5A
TRIM21
HMOX1
DPEP1
CYGB
IDO1
GSTZ1
TP53
ACO1
GJA1
IREB2
SLC7A11
PGRMC1
CIRBP
FAR1
circPSEN1
USP11
STING1
YAP1
HMOX1
MIR135B
TRIM26
YAP1
NDRG1
MIR302A
ASMTL-AS1
ZFAS1
FADS2
PIEZO1
LIFR
PTPN6
MIR15A
EGR1
ADAM23
ARHGEF26-AS1
ACSL4
CPEB1
COX4I2
lncRNA AABR07017145.1
TIMP1
MIR15A
KDM6B
NCOA4
GSK3B
IFNG
METTL14
CHAC1
MIB1
KDM5C
ACSL4
MEG3
CCDC6
ATF3
IREB2
CFL1
ALOXE3
MIR539
KMT2D
SLC7A11
GPX4
AKR1C1
AKR1C2
AKR1C3
GPX4
RB1
HSPB1
HSF1
SLC7A11
GPX4
GCLC
SLC7A11
NFE2L2
SQSTM1
NQO1
HMOX1
FTH1
MUC1
SLC3A2
MT1G
NFE2L2
SLC40A1
SLC7A11
GPX4
SLC7A11
CISD1
SLC7A11
FANCD2
GPX4
NFE2L2
FTMT
HSPA5
ATF4
SLC7A11
GPX4
GPX4
HMOX1
ATF4
NFE2L2
TP53
SLC7A11
HELLS
SCD
FADS2
SRC
STAT3
NFE2L2
PML
MTOR
NFS1
TP63
SLC7A11
TP53
CDKN1A
MIR137
SLC40A1
GPX4
GPX4
ENPP2
VDAC2
FH
CISD2
SLC40A1
MIR9-1
MIR9-2
MIR9-3
CBS
NFE2L2
SQSTM1
GPX4
ISCU
FTH1
ACSL3
OTUB1
CD44
LINC00336
STAT3
BRD4
PRDX6
MIR17
SCD
SESN2
NF2
ARNTL
HIF1A
JUN
CA9
HSPA5
TMBIM4
HSPA5
PLIN2
MIR212
Fer1HCH
AIFM2
AIFM2
LAMP2
ZFP36
GPX4
PROM2
CHMP5
CHMP6
AKR1C1
AKR1C2
AKR1C3
CBS
NFE2L2
CAV1
GCH1
SIRT3
DAZAP1
PIR
GCLC
FTL
HCAR1
SLC16A1
RRM2
SCD
NR4A1
PIK3CA
RPTOR
SREBF1
SREBF2
FZD7
NFE2L2
NFE2L2
P4HB
NT5DC2
BCAT2
HSF1
PLA2G6
MIR424
PARK7
FXN
SUV39H1
ATF2
CDKN1A
FTH1
NFE2L2
STAT3
ACOT1
NFE2L2
ALDH3A2
NFE2L2
STK11
FNDC5
CircIL4R
CDH1
NFE2L2
MIR214
NEDD4L
SQSTM1
TF
FTMT
BRD2
BRD3
BRD4
BRDT
SCD
SLC7A11
DECR1
NFE2L2
GPX4
SLC7A11
NFE2L2
GLRX5
GPX4
NCOA3
NR5A2
GPX4
MTOR
PANX2
RHEBP1
TFAP2A
CP
SLC7A11
ARF6
GDF15
ABHD12
PPP1R13L
TFAM
KDM3B
RNF113A
PARK7
AHCY
FXN
circ-TTBK2
MIR522
IDH2
PPARA
NOS2
SIAH2
RELA
PRKAA2
VDR
NEDD4
FXN
AIFM2
PRDX1
AR
CBS
NFE2L2
CHMP5
CHMP6
HMOX1
ZFP36
LAMP2
MTF1
COPZ1
NUPR1
USP35
HSF1
PROM2
PLA2G6
HIF1A
NEAT1
RRM2
SLC7A11
FTMT
PARP1
PARP2
PARP3
PARP4
PARP6
PARP8
PARP9
PARP10
PARP11
PARP12
PARP14
PARP15
PARP16
PDSS2
TXN
SENP1
PLA2G6
OIP5-AS1
MIR190A
FGF21
CREB1
CREB3
CREB5
FTMT
GOT1
TFRC
GPX4
MIR130B
BEX1
ASAH2
SCD
FABP4
AKT1S1
MLST8
MTOR
RPTOR
CDH1
SIRT1
TYRO3
SIRT6
TMSB4X
TMSB4Y
KIF20A
ECH1
circRHOT1
ETV4
MEG8
VCP
circ_0007142
ENPP2
RBMS1
KDM4A
CBS
MGST1
circKIF4A
miR-7-5p
PRDX6
circ_0067934
MPC1
CHMP1A
CAMKK2
SOX2
SRSF9
PROK2
MIR4443
SIRT2
circRNA1615
MIR27A
MIR670
MEF2C
NF2
CDH1
HSPB1
EZH2
PEDS1
SMPD1
ADAMTS13
CDC25A
G6PD
SRSF9
CAV1
CircFNDC3B
PPARD
CISD2
ENO3
SESN2
LCN2
MARCHF5
TRIB2
DHODH
SLC7A11
MIR545
OTUB1
PDK4
CircPVT1
MIR9-3HG
ADIPOQ
circDTL
GPX4
mmu_circRNA_0000309
IL6
PTPN18
FTH1
FTH1
FTL
LCN2
ABCC5
CISD3
MS4A15
LCN2
FURIN
circRHBG
GALNT14
KLHDC3
LINC01833
circGFRA1
MAPKAP1
MLST8
MTOR
PRR5
RICTOR
GSTM1
TERT
circ0097009
TMEM161B-DT
circEPSTI1
MIR18A
RARRES2
USP11

## Sheet: Supplementary Table 2
Supplementary Table 2. DEGs including 3190 upregulated genes and 3857 downregulated genes in GSE171110.
id	logFC	AveExpr	t	P.Value	adj.P.Val	B
BRCA1	1.47154	9.50519	13.1268	2.09392e-18	6.13561e-14	31.4526
GTSE1	2.58285	7.87797	12.2427	3.53336e-17	5.17672e-13	28.7332
MCM10	2.91429	7.63316	12.0265	7.16207e-17	6.99543e-13	28.0515
NCAPG	2.99784	8.642	11.6822	2.23327e-16	1.63598e-12	26.9528
CDC25A	3.40553	7.467	11.5736	3.20736e-16	1.74502e-12	26.6028
HJURP	2.7797	7.96219	11.5412	3.57317e-16	1.74502e-12	26.4983
CLSPN	2.54199	7.99308	11.4721	4.50322e-16	1.88505e-12	26.2745
RAD54L	2.74883	6.79212	11.3546	6.68347e-16	2.20575e-12	25.8923
TOMM7	-1.44381	11.2237	-11.3506	6.77489e-16	2.20575e-12	25.8792
KIF18B	2.68114	7.45901	11.3024	7.96947e-16	2.33521e-12	25.722
SKA3	2.96996	6.82287	11.1457	1.3539e-15	3.22696e-12	25.2086
CDC6	3.01576	8.51862	11.1397	1.382e-15	3.22696e-12	25.1887
MKI67	2.9325	11.1272	11.116	1.49746e-15	3.22696e-12	25.111
SLX4	0.860845	9.32513	11.1075	1.54179e-15	3.22696e-12	25.0827
SDC1	5.57831	7.47941	11.0563	1.83478e-15	3.58418e-12	24.9141
CDKN1B	-0.727355	12.2776	-10.9916	2.28756e-15	3.98434e-12	24.7003
RPL21P16	-1.86204	13.5204	-10.9698	2.46392e-15	3.98434e-12	24.6283
KIF4A	3.02013	7.6181	10.959	2.55699e-15	3.98434e-12	24.5923
KIF14	2.63065	7.42448	10.956	2.58352e-15	3.98434e-12	24.5823
ASPM	2.82625	8.24454	10.8237	4.06423e-15	5.60843e-12	24.1429
H3C14	2.23252	3.90592	10.8134	4.21082e-15	5.60843e-12	24.1086
H3C15	2.23252	3.90592	10.8134	4.21082e-15	5.60843e-12	24.1086
RPL34	-1.61759	12.618	-10.7728	4.84024e-15	6.11017e-12	23.9734
BUB1	2.92574	9.50746	10.753	5.18147e-15	6.11017e-12	23.9073
H2AC7	3.22507	6.35589	10.7512	5.2131e-15	6.11017e-12	23.9014
TICRR	2.89633	6.62532	10.7156	5.89457e-15	6.64318e-12	23.7822
RPL21	-1.77315	12.7439	-10.6963	6.29865e-15	6.83567e-12	23.7178
TRIB1	1.24301	11.2524	10.6213	8.16106e-15	8.508e-12	23.4664
RPS14	-1.77076	13.0596	-10.6123	8.42031e-15	8.508e-12	23.4361
CDCA5	2.71305	8.44817	10.4567	1.44419e-14	1.34449e-11	22.9122
RPS15A	-1.6007	12.7167	-10.4543	1.45647e-14	1.34449e-11	22.904
LMNB1	1.43242	12.9855	10.452	1.46829e-14	1.34449e-11	22.8961
KNL1	2.08567	8.43128	10.4368	1.54758e-14	1.37416e-11	22.845
DLGAP5	2.54254	8.39838	10.3584	2.03418e-14	1.7531e-11	22.5794
MOAP1	-0.758107	9.72931	-10.3283	2.25944e-14	1.84199e-11	22.4774
MTF1	1.38577	12.0212	10.3278	2.26304e-14	1.84199e-11	22.4758
AC034236.1	-1.82651	10.6103	-10.3171	2.34916e-14	1.86041e-11	22.4395
RRM2	3.06278	11.0025	10.2887	2.595e-14	1.95732e-11	22.3428
RPL39	-1.71545	12.2226	-10.284	2.63755e-14	1.95732e-11	22.327
CCNA2	2.17405	8.8864	10.2803	2.67193e-14	1.95732e-11	22.3144
SHCBP1	2.82103	8.96722	10.2632	2.83681e-14	1.98579e-11	22.2562
HMMR	2.40749	8.04216	10.2623	2.84633e-14	1.98579e-11	22.253
ESPL1	2.99608	7.65019	10.2554	2.91521e-14	1.98654e-11	22.2297
EXO1	2.48697	7.14397	10.2181	3.32223e-14	2.21245e-11	22.1027
KLHDC7A	-2.27017	0.712977	-10.1882	3.68959e-14	2.401e-11	22.0008
H3C4	2.76343	6.61221	10.1813	3.77984e-14	2.401e-11	21.9773
RPS27A	-1.6374	13.8076	-10.176	3.85116e-14	2.401e-11	21.9591
CDCA2	2.78188	7.20728	10.1694	3.94153e-14	2.40614e-11	21.9366
BUB1B	2.59489	8.20422	10.1605	4.0663e-14	2.43165e-11	21.9063
CDC45	2.69656	7.28475	10.146	4.27886e-14	2.50758e-11	21.8567
POLQ	2.46429	7.4768	10.1364	4.42571e-14	2.54279e-11	21.8239
DTL	2.47517	8.55104	10.1232	4.63601e-14	2.57839e-11	21.7788
TPT1	-1.53339	15.9069	-10.1215	4.66366e-14	2.57839e-11	21.773
NCKAP5	-2.44804	0.704526	-10.1032	4.97419e-14	2.69914e-11	21.7103
MYBL2	3.42775	10.4376	10.0927	5.16189e-14	2.75007e-11	21.6743
FOXM1	2.58074	8.83759	10.082	5.35905e-14	2.80412e-11	21.6379
BOD1	-0.878363	8.23932	-10.0312	6.41053e-14	3.29546e-11	21.4636
F5	2.03458	12.6812	10.021	6.64369e-14	3.35644e-11	21.4289
CAMLG	-0.691043	9.74059	-9.98396	7.57299e-14	3.76108e-11	21.3015
DYSF	1.91511	14.4971	9.97481	7.82177e-14	3.81989e-11	21.2701
H2AC13	3.01939	4.65793	9.95609	8.35668e-14	4.01422e-11	21.2058
H1-12P	2.61636	5.51718	9.94149	8.79949e-14	4.14666e-11	21.1555
RPS3A	-2.01539	13.835	-9.93779	8.91542e-14	4.14666e-11	21.1428
H3C8	2.45257	4.23922	9.91318	9.72661e-14	4.35171e-11	21.0581
ARHGAP23	1.99305	5.94299	9.91228	9.75756e-14	4.35171e-11	21.055
E2F8	2.81672	7.37538	9.91101	9.80182e-14	4.35171e-11	21.0506
UHRF1	1.98848	9.14378	9.90185	1.01248e-13	4.42801e-11	21.019
ORC1	2.24766	7.90578	9.89113	1.05168e-13	4.50871e-11	20.9821
KIF23	1.57745	8.05973	9.88845	1.06171e-13	4.50871e-11	20.9728
RPS12	-1.93188	13.8921	-9.86445	1.15593e-13	4.83873e-11	20.8901
TOP2A	2.49394	10.032	9.86002	1.17427e-13	4.84627e-11	20.8748
KLRB1	-3.07906	9.73018	-9.85437	1.19801e-13	4.87557e-11	20.8553
PLK1	2.50541	8.66598	9.8196	1.35532e-13	5.44024e-11	20.7353
TPX2	2.44676	9.47554	9.79135	1.4984e-13	5.93327e-11	20.6376
KIF20A	2.85521	7.37285	9.78152	1.55167e-13	6.04292e-11	20.6036
BIRC5	2.86025	8.33628	9.77869	1.56734e-13	6.04292e-11	20.5938
CENPE	2.00698	8.41164	9.73003	1.86357e-13	7.09175e-11	20.4253
CDC20	3.00393	8.60527	9.70737	2.02019e-13	7.56103e-11	20.3468
CROCC2	-3.93859	1.88139	-9.70484	2.0385e-13	7.56103e-11	20.338
SKA1	2.08363	7.62046	9.66494	2.35005e-13	8.60764e-11	20.1996
CCNB2	2.41061	8.25916	9.63163	2.64674e-13	9.57467e-11	20.0838
E2F2	2.00852	10.5839	9.60594	2.90108e-13	1.03668e-10	19.9945
KIF15	2.26488	7.86817	9.5799	3.18416e-13	1.12413e-10	19.9038
LIX1L	-0.822466	11.0766	-9.57635	3.22481e-13	1.12492e-10	19.8915
CD207	-2.99037	1.17981	-9.56026	3.41587e-13	1.17755e-10	19.8354
NTNG2	2.59208	10.9151	9.53088	3.7947e-13	1.29293e-10	19.733
PFDN5	-1.29334	12.5155	-9.5201	3.94412e-13	1.3284e-10	19.6954
GOLGA2	0.814981	10.8542	9.50738	4.12803e-13	1.37454e-10	19.651
DIAPH3	2.47088	6.58264	9.48622	4.4532e-13	1.46615e-10	19.5772
TTK	2.00771	7.37602	9.47803	4.58599e-13	1.4931e-10	19.5485
RPS20	-1.58177	13.5423	-9.46473	4.81012e-13	1.54886e-10	19.5021
RPS17	-1.40135	12.4437	-9.45279	5.0206e-13	1.59906e-10	19.4604
UBE2C	2.24118	7.86974	9.44232	5.21298e-13	1.64248e-10	19.4237
TMEM42	-0.973791	7.5916	-9.43169	5.4159e-13	1.68826e-10	19.3865
CKAP2L	2.31104	7.22978	9.3848	6.40977e-13	1.97704e-10	19.2224
CENPF	2.04111	9.23239	9.36029	7.00074e-13	2.13683e-10	19.1365
NUSAP1	1.8902	9.40952	9.34392	7.42549e-13	2.24311e-10	19.0791
PCLAF	1.91655	8.03768	9.33485	7.67204e-13	2.29394e-10	19.0473
DPH5	-0.917038	8.99255	-9.32174	8.04306e-13	2.38058e-10	19.0013
RPS6	-1.73543	14.5471	-9.29676	8.80069e-13	2.55693e-10	18.9136
SLC26A8	2.8963	9.9019	9.29636	8.81338e-13	2.55693e-10	18.9122
TYMS	2.47364	9.76396	9.28849	9.06684e-13	2.60467e-10	18.8845
DEPDC1	2.58588	6.56339	9.28457	9.19598e-13	2.61612e-10	18.8708
E2F7	2.63924	6.41461	9.27524	9.51084e-13	2.67968e-10	18.8379
RPS13	-1.39872	12.9828	-9.26357	9.91983e-13	2.76829e-10	18.7969
ITGAM	1.14492	14.5585	9.25814	1.01162e-12	2.79646e-10	18.7778
RPL35A	-1.35134	12.8839	-9.23832	1.08664e-12	2.97578e-10	18.7081
RPL30	-1.41818	14.1244	-9.21778	1.17032e-12	3.17524e-10	18.6358
PITPNC1	-1.07966	10.6562	-9.19056	1.29126e-12	3.47124e-10	18.54
UBA52	-1.81133	14.357	-9.17687	1.35682e-12	3.61432e-10	18.4917
ANAPC16	-0.773017	11.6304	-9.15519	1.46752e-12	3.874e-10	18.4153
H4C4	2.51217	4.55647	9.14885	1.50154e-12	3.90748e-10	18.3929
RPS25	-1.30489	13.4142	-9.14787	1.50688e-12	3.90748e-10	18.3895
MEAF6	-0.811162	10.6636	-9.14355	1.53064e-12	3.93429e-10	18.3742
KIF11	2.0664	9.46345	9.13495	1.57906e-12	4.02343e-10	18.3439
MELK	2.27925	7.37315	9.12518	1.63588e-12	4.13229e-10	18.3094
CDK1	2.21883	8.22406	9.09694	1.81216e-12	4.53846e-10	18.2097
ARNTL2	1.45981	7.38009	9.08078	1.92148e-12	4.77147e-10	18.1526
ADAT2	-1.05903	7.69012	-9.06228	2.05481e-12	5.05967e-10	18.0872
B3GALT2	-3.0495	4.77716	-9.05914	2.07835e-12	5.07499e-10	18.0761
RPL31	-1.38769	13.3912	-9.04883	2.15752e-12	5.19942e-10	18.0396
RPS7	-1.4304	13.2153	-9.0479	2.1648e-12	5.19942e-10	18.0364
KIF2C	2.29829	8.2128	9.04519	2.18621e-12	5.20816e-10	18.0268
HASPIN	2.22605	6.5347	9.0311	2.30093e-12	5.43724e-10	17.9769
PKMYT1	2.89512	6.92328	9.00696	2.51175e-12	5.88795e-10	17.8914
RPS23P8	-1.89595	11.2676	-9.00236	2.55404e-12	5.93956e-10	17.8752
BLCAP	-0.564813	10.967	-8.99887	2.58666e-12	5.96805e-10	17.8628
NDRG2	-1.82798	7.3303	-8.99056	2.66591e-12	6.05731e-10	17.8334
AURKB	2.2784	7.88464	8.99013	2.67013e-12	6.05731e-10	17.8318
EEF1A1P19	-1.7339	4.47166	-8.98836	2.68736e-12	6.05731e-10	17.8256
LYRM4	-0.818455	8.37544	-8.98287	2.74148e-12	6.13213e-10	17.8061
SPAG5	2.02377	9.12439	8.97114	2.86094e-12	6.35086e-10	17.7645
SPC25	2.24613	6.65428	8.95831	2.99757e-12	6.58395e-10	17.719
RRBP1	1.80366	12.2397	8.95709	3.01089e-12	6.58395e-10	17.7147
SPC24	2.02274	6.95281	8.92041	3.44075e-12	7.46821e-10	17.5846
RPS11	-1.22281	14.6485	-8.9078	3.60244e-12	7.76166e-10	17.5398
ITGA7	4.06687	8.15085	8.89917	3.71738e-12	7.95085e-10	17.5092
KIFC1	2.18116	8.71658	8.88412	3.92693e-12	8.33817e-10	17.4557
AP5B1	1.63785	11.9788	8.8267	4.84128e-12	1.02057e-09	17.2516
RPL27	-1.29538	12.9408	-8.79925	5.35151e-12	1.12007e-09	17.1539
CCNI	-0.722429	14.0909	-8.7914	5.50699e-12	1.14421e-09	17.126
CD1C	-2.32813	7.27283	-8.78952	5.54494e-12	1.14421e-09	17.1193
FER1L4	2.74624	6.36231	8.78561	5.62464e-12	1.15254e-09	17.1054
CEP55	2.27456	8.24234	8.77955	5.75066e-12	1.17018e-09	17.0838
CDT1	2.4247	7.70813	8.77023	5.94976e-12	1.20234e-09	17.0506
MDS2	-1.69486	5.02308	-8.7585	6.21014e-12	1.24637e-09	17.0088
TK1	2.48044	8.70275	8.75431	6.30601e-12	1.257e-09	16.9938
RPS10	-1.82765	12.6065	-8.7504	6.39681e-12	1.26648e-09	16.9799
DEPDC1B	2.02225	7.18514	8.74302	6.57179e-12	1.29239e-09	16.9536
NEK2	2.15069	6.91492	8.73578	6.74794e-12	1.31819e-09	16.9278
NCAPH	2.05621	8.08326	8.73055	6.87829e-12	1.33358e-09	16.9091
AC107075.1	-1.14967	10.092	-8.72898	6.91776e-12	1.33358e-09	16.9035
S100A9	1.78363	18.0133	8.71731	7.21946e-12	1.3809e-09	16.8619
WNT10B	-1.85381	5.08553	-8.71587	7.25748e-12	1.3809e-09	16.8568
B4GALT5	1.49178	13.3969	8.70659	7.50825e-12	1.4194e-09	16.8237
RPL17	-1.32209	13.7307	-8.70319	7.60213e-12	1.42793e-09	16.8115
COQ10A	-1.16563	7.43395	-8.68591	8.09841e-12	1.51067e-09	16.7499
H2BC8	2.40586	6.33963	8.68432	8.14572e-12	1.51067e-09	16.7442
RPS29	-1.48661	11.5534	-8.6752	8.42221e-12	1.53191e-09	16.7116
KIF1C	0.519525	10.5988	8.67427	8.45074e-12	1.53191e-09	16.7083
SHISA4	-2.66252	5.68864	-8.67415	8.45462e-12	1.53191e-09	16.7079
GINS1	1.59971	6.61328	8.67249	8.50599e-12	1.53191e-09	16.702
AC103563.5	5.09905	5.26307	8.67199	8.52162e-12	1.53191e-09	16.7002
UBE2J1	1.29891	13.4221	8.6682	8.64086e-12	1.54387e-09	16.6866
SLCO4A1	2.62568	6.71106	8.64925	9.26156e-12	1.64474e-09	16.619
SLC18A1	-2.25079	2.92011	-8.6419	9.51457e-12	1.67949e-09	16.5927
RPL6	-1.4105	14.5408	-8.6307	9.91294e-12	1.73934e-09	16.5527
TRIP13	2.4096	7.36478	8.62592	1.00881e-11	1.75305e-09	16.5356
ALDH1L2	2.75882	6.82417	8.62531	1.01108e-11	1.75305e-09	16.5334
PYCR1	3.04801	6.96411	8.61017	1.06879e-11	1.84221e-09	16.4792
KCNN3	3.20362	7.06593	8.60442	1.09156e-11	1.87045e-09	16.4587
KANSL2	-0.631755	9.6813	-8.60229	1.10012e-11	1.87416e-09	16.4511
AC099560.2	-1.601	12.8676	-8.59534	1.1285e-11	1.9114e-09	16.4262
MAFG	1.5718	10.6598	8.59002	1.15074e-11	1.93787e-09	16.4072
RPS23	-1.46349	13.7375	-8.58413	1.17584e-11	1.96883e-09	16.3861
KAT7	-0.515886	11.29	-8.57921	1.19725e-11	1.99328e-09	16.3685
RPL24	-1.24204	12.7397	-8.53547	1.40575e-11	2.30787e-09	16.2119
HBB	-5.47385	10.8148	-8.53422	1.41221e-11	2.30787e-09	16.2074
CCNE2	1.52572	7.61349	8.53367	1.41509e-11	2.30787e-09	16.2054
IL17RA	0.978844	14.6088	8.53316	1.41771e-11	2.30787e-09	16.2036
ZNF419	-0.866406	8.21836	-8.51565	1.5119e-11	2.44761e-09	16.1409
DNAJC19	-0.701648	8.44869	-8.50805	1.55468e-11	2.50303e-09	16.1137
H2BC5	2.70137	9.48206	8.50531	1.57044e-11	2.51459e-09	16.1038
TOMM20	-0.998362	11.3664	-8.50305	1.58349e-11	2.52171e-09	16.0957
FAM20A	3.45751	7.94151	8.49684	1.6201e-11	2.56606e-09	16.0735
ENHO	-3.43343	2.93828	-8.47848	1.73317e-11	2.71615e-09	16.0076
MFSD14C	1.31689	5.24373	8.47844	1.7334e-11	2.71615e-09	16.0075
RPL37	-1.21915	13.8287	-8.47319	1.76719e-11	2.73233e-09	15.9887
NACA	-1.07296	13.9056	-8.47198	1.77507e-11	2.73233e-09	15.9843
CKAP4	1.69248	12.8709	8.47031	1.786e-11	2.73233e-09	15.9783
NOS1AP	2.64753	4.0012	8.46954	1.79107e-11	2.73233e-09	15.9756
RPS3	-1.431	14.2583	-8.46931	1.79257e-11	2.73233e-09	15.9748
LY6G6C	3.03792	4.86832	8.46824	1.79967e-11	2.73233e-09	15.9709
RPL32	-1.49917	14.0293	-8.44785	1.93977e-11	2.92985e-09	15.8978
ZFAND1	-0.943961	9.29452	-8.4453	1.95807e-11	2.94232e-09	15.8886
GGH	2.22853	8.44638	8.43753	2.01487e-11	3.01223e-09	15.8607
RPL38	-1.22992	12.6785	-8.42549	2.10613e-11	3.13267e-09	15.8175
BTF3	-1.1386	13.3028	-8.42203	2.13312e-11	3.15238e-09	15.8051
ORC6	1.36557	7.18442	8.42104	2.14089e-11	3.15238e-09	15.8015
EEF1A1P6	-1.59227	8.06573	-8.4074	2.25107e-11	3.29804e-09	15.7525
RPL37A	-1.2302	13.4664	-8.40579	2.26447e-11	3.30116e-09	15.7468
ESCO2	1.87294	7.24575	8.3874	2.42308e-11	3.51491e-09	15.6807
APOBR	1.65963	13.2817	8.3835	2.45819e-11	3.54661e-09	15.6667
STIL	1.62245	7.90938	8.38212	2.47066e-11	3.54661e-09	15.6617
RPL7	-1.43783	14.5464	-8.38096	2.48125e-11	3.54661e-09	15.6576
RPL5	-1.47403	13.9476	-8.37834	2.50535e-11	3.56367e-09	15.6481
RPL22P1	-1.3056	11.9145	-8.36703	2.61188e-11	3.69725e-09	15.6075
CDC25C	2.33579	5.50176	8.35311	2.7494e-11	3.87321e-09	15.5574
RNASE1	4.73397	7.93402	8.3518	2.76271e-11	3.87334e-09	15.5527
IL17RE	-1.62736	4.39967	-8.33947	2.89107e-11	4.02946e-09	15.5084
MRFAP1L1	-0.766915	11.1911	-8.33849	2.90156e-11	4.02946e-09	15.5049
RPL13A	-1.47247	15.2174	-8.32689	3.02827e-11	4.18559e-09	15.4632
HMGB2	1.42492	13.4088	8.31777	3.13184e-11	4.30841e-09	15.4304
JUN	1.54131	9.26743	8.31329	3.18409e-11	4.34951e-09	15.4142
ZWINT	2.17418	8.67915	8.3126	3.19214e-11	4.34951e-09	15.4117
TROAP	2.50196	7.02318	8.31092	3.21193e-11	4.34951e-09	15.4057
LTK	-1.85528	6.98208	-8.31015	3.22109e-11	4.34951e-09	15.4029
HTR3A	-2.65108	2.12295	-8.30325	3.30414e-11	4.44119e-09	15.3781
PCBP2	-0.587627	14.2579	-8.29848	3.3628e-11	4.4994e-09	15.3609
RPL22	-1.35996	12.5656	-8.28983	3.47183e-11	4.62416e-09	15.3298
SLC36A1	1.43777	11.0802	8.2849	3.5355e-11	4.68765e-09	15.3121
SLC4A10	-3.98496	6.08315	-8.27838	3.62163e-11	4.78022e-09	15.2886
KLHDC2	-0.605895	9.72308	-8.27379	3.68354e-11	4.84014e-09	15.272
NEU1	0.691303	10.843	8.26391	3.82023e-11	4.99734e-09	15.2365
SLC25A26	-0.931272	8.10175	-8.25417	3.96008e-11	5.15725e-09	15.2014
EIF3H	-1.00019	12.6271	-8.25142	4.00055e-11	5.18691e-09	15.1915
RPLP2	-1.40136	13.564	-8.23692	4.22058e-11	5.43423e-09	15.1392
NFYB	-0.732573	9.59638	-8.23642	4.2284e-11	5.43423e-09	15.1374
CHEK1	1.71262	8.04292	8.22513	4.40844e-11	5.64088e-09	15.0967
TTC9	-1.60925	9.17685	-8.22132	4.47091e-11	5.69454e-09	15.083
CCNB1	1.92855	8.74436	8.22021	4.48925e-11	5.69454e-09	15.079
PDCD2	-0.555674	10.452	-8.21325	4.60614e-11	5.81764e-09	15.0539
RPL15	-1.25704	14.4352	-8.21089	4.64645e-11	5.84336e-09	15.0454
DDHD2	-0.944474	10.0064	-8.20599	4.73127e-11	5.9246e-09	15.0278
CENPA	2.27723	6.30485	8.20198	4.80191e-11	5.96798e-09	15.0133
RPL23A	-1.48761	13.86	-8.19982	4.84039e-11	5.96798e-09	15.0055
ZNF530	-0.847387	6.81442	-8.19867	4.86107e-11	5.96798e-09	15.0014
BHLHA15	3.61304	5.708	8.1983	4.86772e-11	5.96798e-09	15
H2BC6	2.19986	3.85866	8.19778	4.877e-11	5.96798e-09	14.9982
DAP3	-0.588106	11.3031	-8.19597	4.90979e-11	5.96798e-09	14.9916
SPAG4	2.3687	4.53236	8.19514	4.92492e-11	5.96798e-09	14.9886
INPP5B	-0.514181	10.1654	-8.19492	4.92885e-11	5.96798e-09	14.9878
RORC	-2.41126	6.52997	-8.18605	5.09316e-11	6.14156e-09	14.9558
CLDND1	-0.867544	10.9973	-8.16885	5.42736e-11	6.51772e-09	14.8938
PIF1	1.41319	6.51898	8.16251	5.5562e-11	6.64521e-09	14.8709
IL36A	-1.87645	0.635558	-8.15964	5.61535e-11	6.68866e-09	14.8606
AL683842.1	2.15023	4.59167	8.15719	5.66648e-11	6.72224e-09	14.8518
FOSL1	2.21138	5.14049	8.14413	5.94677e-11	7.02631e-09	14.8046
EIF2D	-0.677505	10.1531	-8.13948	6.05008e-11	7.10853e-09	14.7878
TRAJ33	-2.63216	2.87512	-8.13882	6.06489e-11	7.10853e-09	14.7854
NRCAM	-3.63873	4.3249	-8.12956	6.27608e-11	7.32676e-09	14.752
RANBP6	-1.02967	9.28032	-8.12683	6.33989e-11	7.37188e-09	14.7422
TGIF1	-0.806388	9.16175	-8.12089	6.48061e-11	7.50572e-09	14.7207
MZB1	3.15887	11.5037	8.11542	6.61321e-11	7.62914e-09	14.701
UBE2S	1.4037	8.93729	8.11416	6.64413e-11	7.63476e-09	14.6964
METTL7B	4.65036	6.8799	8.11167	6.7056e-11	7.67529e-09	14.6874
RPL19	-1.37689	14.7074	-8.10603	6.84709e-11	7.80675e-09	14.6671
CDCA3	1.7826	7.3335	8.10177	6.95572e-11	7.89986e-09	14.6517
TYSND1	-0.793453	8.49676	-8.09764	7.06308e-11	7.99083e-09	14.6368
CYP19A1	4.31178	4.63797	8.09201	7.21157e-11	8.12744e-09	14.6165
KIF1B	1.36244	11.8712	8.08965	7.27492e-11	8.16742e-09	14.6079
RPS18	-1.57184	13.7253	-8.08803	7.31867e-11	8.18517e-09	14.6021
ANLN	2.4672	7.8549	8.08335	7.44666e-11	8.29643e-09	14.5852
EEF1B2	-1.47729	12.8411	-8.08233	7.47477e-11	8.29643e-09	14.5815
ARL2BP	-0.694327	10.6205	-8.0796	7.55058e-11	8.34894e-09	14.5716
CUX1	0.608902	12.1645	8.07834	7.58586e-11	8.35643e-09	14.5671
CARD6	1.35071	10.8553	8.07513	7.67674e-11	8.42487e-09	14.5555
TTC19	-0.706131	9.55714	-8.04402	8.61415e-11	9.41835e-09	14.443
SEMA3B	2.11729	5.49242	8.04281	8.65284e-11	9.42549e-09	14.4386
JADE1	-0.540869	11.0623	-8.03695	8.8425e-11	9.59641e-09	14.4175
NUF2	1.7275	7.68679	8.03023	9.06543e-11	9.72752e-09	14.3932
TMEM128	-0.824884	8.57292	-8.02959	9.08698e-11	9.72752e-09	14.3909
TLN1	0.731574	15.8101	8.02943	9.09233e-11	9.72752e-09	14.3903
RPL26	-1.63879	10.4035	-8.0293	9.09689e-11	9.72752e-09	14.3898
AC115223.1	-1.10223	6.98913	-8.02834	9.1293e-11	9.72752e-09	14.3863
OVGP1	-1.46634	5.64709	-8.02493	9.24524e-11	9.81537e-09	14.374
OCIAD1	-0.548795	11.3966	-8.01867	9.46228e-11	1.00095e-08	14.3514
MARCHF9	-1.0014	8.75699	-7.99967	1.01524e-10	1.07009e-08	14.2827
EIF3L	-1.28773	13.0742	-7.99719	1.02462e-10	1.07351e-08	14.2737
LEPROTL1	-1.14668	11.75	-7.99616	1.02855e-10	1.07351e-08	14.27
RPL10	-1.51724	14.6603	-7.99592	1.02947e-10	1.07351e-08	14.2691
ELOVL4	-2.81854	4.84337	-7.99011	1.05186e-10	1.09297e-08	14.2481
RPL23	-1.20295	13.7013	-7.98811	1.0597e-10	1.09722e-08	14.2408
NCR3	-1.82305	8.07693	-7.98323	1.07903e-10	1.1133e-08	14.2232
CTSD	1.38585	15.0814	7.98222	1.08309e-10	1.11357e-08	14.2195
ARHGEF11	0.94405	12.1776	7.97462	1.11406e-10	1.14141e-08	14.192
BPHL	-0.627566	6.7674	-7.97324	1.11977e-10	1.14326e-08	14.187
MT-ATP6	-1.30878	15.9964	-7.97186	1.12551e-10	1.14513e-08	14.1821
PLLP	-0.677573	6.90194	-7.96724	1.14497e-10	1.16089e-08	14.1653
CR1	1.86852	13.9368	7.96353	1.16082e-10	1.17291e-08	14.1519
RPS8	-1.35249	13.8731	-7.95742	1.1874e-10	1.19564e-08	14.1298
MCM4	1.75297	8.79242	7.95132	1.21457e-10	1.21682e-08	14.1077
GALNT12	-1.56166	6.87805	-7.95062	1.21775e-10	1.21682e-08	14.1052
ZNF19	-0.752988	6.63087	-7.94993	1.22088e-10	1.21682e-08	14.1027
NDFIP1	-0.749567	11.9665	-7.94634	1.23724e-10	1.22893e-08	14.0897
H2BC7	2.5692	5.25436	7.94332	1.25119e-10	1.23531e-08	14.0787
GINS2	2.03602	7.56513	7.94312	1.25209e-10	1.23531e-08	14.078
GALNT14	3.06923	8.35072	7.9372	1.2799e-10	1.25851e-08	14.0566
TMEM243	-0.775796	9.47479	-7.93586	1.28628e-10	1.26055e-08	14.0517
TSPYL1	-0.741223	11.4565	-7.92796	1.32455e-10	1.28976e-08	14.0231
CCNB1IP1	-0.92019	8.55574	-7.92789	1.32488e-10	1.28976e-08	14.0229
ELL2	2.06028	11.3455	7.91709	1.37904e-10	1.33804e-08	13.9838
RBBP8	0.910152	9.51119	7.91331	1.39853e-10	1.34557e-08	13.9701
SLC9A1	0.955064	11.3486	7.91296	1.40037e-10	1.34557e-08	13.9688
RPL36A	-1.09547	10.8348	-7.91291	1.40058e-10	1.34557e-08	13.9687
CACNA2D3	-3.73205	5.24537	-7.90809	1.4259e-10	1.36542e-08	13.9512
RPL18A	-1.34771	13.529	-7.89798	1.48039e-10	1.41298e-08	13.9146
EEF1A1P16	-1.49038	5.05907	-7.89639	1.48919e-10	1.41676e-08	13.9088
CFAP36	-1.07691	8.36606	-7.89535	1.49494e-10	1.41763e-08	13.905
HBA2	-4.7203	10.4411	-7.89165	1.51557e-10	1.43158e-08	13.8917
RPL3P4	-1.66706	11.8381	-7.89081	1.52035e-10	1.43158e-08	13.8886
AZIN2	-1.57191	5.36057	-7.89011	1.52431e-10	1.43158e-08	13.886
NES	3.50345	3.39723	7.88688	1.54265e-10	1.44399e-08	13.8744
SINHCAF	-0.868602	10.5558	-7.88606	1.54738e-10	1.44399e-08	13.8714
CENPW	1.78339	6.68423	7.87876	1.5899e-10	1.47896e-08	13.8449
PPARG	2.94287	6.76107	7.87678	1.60161e-10	1.48386e-08	13.8378
TNRC18	0.827157	12.1475	7.87616	1.6053e-10	1.48386e-08	13.8355
E2F1	2.33886	8.66066	7.87272	1.62592e-10	1.4982e-08	13.8231
SCARA5	-3.05089	1.87701	-7.86809	1.65416e-10	1.51944e-08	13.8063
ACOXL	1.93023	5.61615	7.85939	1.70847e-10	1.56442e-08	13.7747
RNASE2	2.35635	12.0763	7.85761	1.7198e-10	1.56989e-08	13.7683
NEPRO	-0.73484	10.5715	-7.84252	1.81891e-10	1.65521e-08	13.7136
MT-ND4	-1.09055	16.9215	-7.8354	1.86762e-10	1.69428e-08	13.6878
NSMCE4A	-0.543059	9.4078	-7.8275	1.92328e-10	1.73938e-08	13.6592
LIAS	-0.578324	7.87735	-7.82349	1.95211e-10	1.76003e-08	13.6446
IL10	1.97902	5.74942	7.81631	2.00491e-10	1.80208e-08	13.6186
CCNG1	-0.759123	11.1824	-7.81078	2.04654e-10	1.83387e-08	13.5985
LETMD1	-0.661511	10.2897	-7.80642	2.07998e-10	1.85816e-08	13.5827
NR1D1	-1.28178	7.77348	-7.80462	2.09389e-10	1.86252e-08	13.5762
SIL1	1.15135	9.53488	7.80415	2.09758e-10	1.86252e-08	13.5745
IGLV3-1	4.03702	11.5007	7.80063	2.12522e-10	1.88136e-08	13.5617
PRKCD	0.745289	13.6216	7.79567	2.1647e-10	1.91054e-08	13.5437
SRSF5	-0.736276	12.9305	-7.79196	2.19475e-10	1.92841e-08	13.5303
TEDC2	2.35224	4.65421	7.79155	2.19811e-10	1.92841e-08	13.5288
C1QTNF3	-1.28056	5.83742	-7.79017	2.20946e-10	1.93095e-08	13.5238
CMPK1	-1.02176	12.1262	-7.78959	2.21418e-10	1.93095e-08	13.5217
CIT	1.94038	7.80584	7.78868	2.22172e-10	1.93177e-08	13.5184
RPL10A	-1.38254	13.5883	-7.7827	2.27166e-10	1.96669e-08	13.4967
APOBEC3B	2.37572	9.25536	7.78227	2.2753e-10	1.96669e-08	13.4951
CENPM	2.18721	6.68522	7.77415	2.34501e-10	2.02099e-08	13.4657
ADCK1	-0.930114	7.40949	-7.75765	2.49338e-10	2.14112e-08	13.4058
PBK	2.55769	6.24615	7.75506	2.51746e-10	2.14112e-08	13.3964
FAM72A	1.34347	6.9232	7.75498	2.51821e-10	2.14112e-08	13.3961
DRAM1	1.16794	10.4587	7.75459	2.52188e-10	2.14112e-08	13.3947
PRSS35	-3.32383	2.11835	-7.75418	2.52567e-10	2.14112e-08	13.3932
OIP5	1.4621	6.0336	7.75391	2.52824e-10	2.14112e-08	13.3922
EIF3E	-1.28008	12.7083	-7.7449	2.61442e-10	2.20771e-08	13.3595
SHROOM2P1	-1.20694	0.338416	-7.73508	2.71163e-10	2.28322e-08	13.3239
SRP9	-0.678713	12.0346	-7.73334	2.72921e-10	2.29144e-08	13.3176
ATG16L1	-0.501154	10.0479	-7.72486	2.81663e-10	2.35809e-08	13.2868
CLU	2.0254	13.2424	7.72268	2.83961e-10	2.37054e-08	13.2789
PCMTD2	-0.843187	10.9968	-7.71387	2.93424e-10	2.44258e-08	13.2469
SCART1	-1.38744	6.38697	-7.71011	2.97551e-10	2.46992e-08	13.2333
IGHV4-59	3.15494	10.813	7.69866	3.10499e-10	2.57013e-08	13.1917
AC008984.5	2.29681	4.11854	7.69189	3.18415e-10	2.62084e-08	13.1671
AC245884.2	2.29681	4.11854	7.69189	3.18415e-10	2.62084e-08	13.1671
AL022722.1	2.10009	2.40381	7.68386	3.28082e-10	2.68819e-08	13.1379
MXD3	1.92205	9.9856	7.68357	3.28432e-10	2.68819e-08	13.1369
IGHG1	4.45371	15.5089	7.67771	3.35671e-10	2.73606e-08	13.1156
ITFG2	-0.675859	9.4167	-7.67733	3.36148e-10	2.73606e-08	13.1142
FOXO1	-0.870585	11.1604	-7.67466	3.39496e-10	2.75565e-08	13.1046
MT-CYB	-1.31409	15.5692	-7.67048	3.44827e-10	2.78322e-08	13.0894
ASS1	2.71229	4.07545	7.66977	3.45741e-10	2.78322e-08	13.0868
MAPK14	1.24611	13.8878	7.66429	3.52862e-10	2.83276e-08	13.0669
ARPP21	-1.45428	0.564593	-7.6584	3.60677e-10	2.88759e-08	13.0455
HP	3.4871	10.9749	7.6527	3.68413e-10	2.94148e-08	13.0248
GEM	-2.4686	1.35562	-7.6512	3.7047e-10	2.94987e-08	13.0194
MYD88	0.662735	13.9382	7.65015	3.71923e-10	2.95341e-08	13.0155
EEF1A1P12	-1.74063	4.85204	-7.64651	3.76998e-10	2.98562e-08	13.0023
MAT2B	-0.741566	12.5125	-7.64492	3.79232e-10	2.99522e-08	12.9966
ID3	-1.84797	7.10157	-7.64254	3.82614e-10	3.01381e-08	12.9879
HVCN1	-1.03738	10.9872	-7.63921	3.8739e-10	3.02908e-08	12.9758
RPL11	-1.2815	14.4837	-7.63901	3.87668e-10	3.02908e-08	12.9751
RSAD1	-0.733252	9.51681	-7.63893	3.87787e-10	3.02908e-08	12.9748
IGHJ3	3.09204	9.1658	7.63798	3.89156e-10	3.02908e-08	12.9713
NACC1	0.685233	10.7938	7.63759	3.89721e-10	3.02908e-08	12.9699
BTG1	-0.84599	13.9908	-7.63592	3.92155e-10	3.03429e-08	12.9639
DUSP13	3.69787	5.49513	7.63571	3.92464e-10	3.03429e-08	12.9631
TNK2	0.992278	9.93536	7.63348	3.95743e-10	3.0516e-08	12.955
DOT1L	0.764315	10.2704	7.63204	3.97861e-10	3.05988e-08	12.9498
KRT8P26	2.30531	3.66955	7.62763	4.0445e-10	3.09506e-08	12.9337
PAIP2	-0.573807	12.3307	-7.62756	4.04549e-10	3.09506e-08	12.9335
AC244157.2	-2.59383	1.93082	-7.61848	4.18463e-10	3.19177e-08	12.9005
FAM162A	-0.709185	8.79233	-7.6179	4.19367e-10	3.19177e-08	12.8984
CRY2	-0.554732	9.80374	-7.61245	4.27965e-10	3.24877e-08	12.8786
AURKA	1.52848	8.17766	7.59802	4.51593e-10	3.41927e-08	12.8261
SLC44A1	0.877067	11.4234	7.59726	4.52869e-10	3.42009e-08	12.8234
GZMK	-2.40457	9.51429	-7.59433	4.57843e-10	3.44877e-08	12.8127
CREBL2	-1.13395	10.6699	-7.59215	4.61571e-10	3.46794e-08	12.8048
TAMM41	-0.903691	7.66089	-7.59048	4.64449e-10	3.48064e-08	12.7987
RPL13	-1.42505	14.2972	-7.58511	4.73836e-10	3.54192e-08	12.7792
MCEMP1	2.7123	11.6314	7.58143	4.80377e-10	3.58168e-08	12.7658
AC116533.1	-1.21835	12.6888	-7.57861	4.85437e-10	3.61022e-08	12.7556
SLC38A10	0.812056	12.1969	7.56853	5.04006e-10	3.73883e-08	12.719
TBC1D2	1.06424	10.5284	7.56646	5.07919e-10	3.75238e-08	12.7114
SKP1	-0.709977	12.3953	-7.56621	5.08394e-10	3.75238e-08	12.7105
EIF3D	-0.895849	12.6438	-7.56506	5.10563e-10	3.75892e-08	12.7064
IFITM3P6	-1.66897	5.93591	-7.55665	5.26821e-10	3.85923e-08	12.6758
GPR183	-1.77524	10.2344	-7.54818	5.43698e-10	3.97293e-08	12.645
CRISPLD2	1.47463	13.0366	7.54364	5.52979e-10	4.03069e-08	12.6285
CDCA8	1.52837	8.21755	7.54171	5.56962e-10	4.04966e-08	12.6215
SARAF	-1.0065	13.9517	-7.53279	5.75785e-10	4.17615e-08	12.589
C3orf33	-0.974476	5.598	-7.53108	5.79464e-10	4.19246e-08	12.5828
OPRL1	1.36543	9.64977	7.52635	5.89783e-10	4.25661e-08	12.5656
RSL24D1	-0.740645	11.0393	-7.52267	5.97918e-10	4.30471e-08	12.5522
ZNF223	-1.20205	6.31914	-7.5207	6.02331e-10	4.32586e-08	12.5451
RPL12	-1.36709	13.9369	-7.51426	6.16957e-10	4.42007e-08	12.5216
CYB561	-1.06585	8.75951	-7.51231	6.21456e-10	4.43476e-08	12.5146
FANCF	-0.818429	9.034	-7.51206	6.22035e-10	4.43476e-08	12.5137
AC009245.1	-1.77402	2.49343	-7.5112	6.24033e-10	4.43821e-08	12.5105
PYGO2	-0.598345	10.7334	-7.50943	6.28152e-10	4.45669e-08	12.5041
ZBTB14	-0.751864	9.76597	-7.50411	6.40739e-10	4.53501e-08	12.4847
C1orf226	2.92738	5.97356	7.50232	6.45021e-10	4.55431e-08	12.4782
IL23A	-1.60202	6.23774	-7.49525	6.62255e-10	4.66476e-08	12.4525
RAD51	1.76565	7.42756	7.49373	6.66011e-10	4.67996e-08	12.447
MYH9	0.588557	16.3251	7.491	6.72821e-10	4.71438e-08	12.4371
CDK14	1.12911	10.2275	7.49048	6.74127e-10	4.71438e-08	12.4352
ZNF599	-1.10686	6.21465	-7.48514	6.87666e-10	4.79762e-08	12.4158
ECE1	1.04835	13.5541	7.48366	6.91466e-10	4.81267e-08	12.4104
POC1A	1.48034	7.25702	7.48283	6.93606e-10	4.81613e-08	12.4074
RPL4	-1.33592	15.2858	-7.48203	6.95682e-10	4.81912e-08	12.4045
IGLV1-40	3.16596	11.1267	7.48129	6.97607e-10	4.82105e-08	12.4018
PPP1R2	-0.727239	11.4088	-7.4738	7.17362e-10	4.94591e-08	12.3745
VAMP2	-0.766356	12.0895	-7.46332	7.45944e-10	5.1309e-08	12.3364
FAM72B	1.38319	6.73346	7.45282	7.75723e-10	5.31311e-08	12.2982
HLA-DMB	-1.60355	11.1464	-7.4527	7.76061e-10	5.31311e-08	12.2978
RABGAP1L	-0.939381	11.5545	-7.4505	7.8245e-10	5.34437e-08	12.2898
RPS24	-1.09922	14.1912	-7.44274	8.05414e-10	5.48843e-08	12.2615
ETFDH	0.541334	9.44528	7.44136	8.09583e-10	5.50404e-08	12.2565
G0S2	2.70279	6.94313	7.43591	8.26183e-10	5.60389e-08	12.2367
ALAS1	0.72658	10.8728	7.43519	8.28413e-10	5.60604e-08	12.2341
WDR62	1.49355	7.36842	7.43286	8.35637e-10	5.6419e-08	12.2256
NDUFAF1	0.703072	9.12962	7.42774	8.5174e-10	5.7374e-08	12.207
OSGEPL1	-1.07523	7.3852	-7.42495	8.60642e-10	5.78407e-08	12.1968
LAMB1	1.54462	5.10306	7.41058	9.08019e-10	6.08654e-08	12.1445
SNHG32	-1.09844	10.6207	-7.41006	9.09804e-10	6.08654e-08	12.1426
SLC2A3	1.34608	14.6998	7.38734	9.90229e-10	6.60949e-08	12.06
ARID3A	1.21286	11.286	7.38338	1.00498e-09	6.69268e-08	12.0455
UCHL1	3.93995	5.62733	7.38241	1.0086e-09	6.69703e-08	12.042
LY6G6E	2.37798	6.96718	7.38199	1.0102e-09	6.69703e-08	12.0405
DPH6	-1.05526	7.05014	-7.37856	1.0232e-09	6.76792e-08	12.028
PLBD1	1.46645	14.3909	7.36957	1.05807e-09	6.98282e-08	11.9953
SHISAL2A	-0.840641	7.03854	-7.36735	1.06688e-09	7.00938e-08	11.9872
ZNF502	-1.67247	5.88766	-7.36735	1.06688e-09	7.00938e-08	11.9872
RYK	-0.691711	9.65026	-7.36409	1.07993e-09	7.07924e-08	11.9754
GRN	1.03135	15.1403	7.3587	1.10188e-09	7.20698e-08	11.9557
GLOD4	-0.862661	10.3571	-7.35454	1.11907e-09	7.30314e-08	11.9406
TMEM67	-0.998988	5.83681	-7.35226	1.12865e-09	7.34927e-08	11.9323
SGO1	1.34331	6.83502	7.3489	1.14289e-09	7.42549e-08	11.9201
NOL3	1.59661	6.76089	7.34474	1.16076e-09	7.52493e-08	11.9049
SELENOF	-0.542129	12.1014	-7.34241	1.1709e-09	7.57386e-08	11.8965
ZNF512	-0.799941	10.2893	-7.33986	1.18206e-09	7.62925e-08	11.8872
ERCC6L	1.63556	6.41585	7.33696	1.19493e-09	7.69537e-08	11.8766
ZNF134	-0.825066	9.11593	-7.33063	1.2235e-09	7.86206e-08	11.8536
ADM	2.07845	10.8439	7.32832	1.2341e-09	7.91281e-08	11.8452
CMTM1	1.68537	7.62702	7.32393	1.25446e-09	8.0083e-08	11.8292
TC2N	-2.1063	10.9724	-7.31567	1.29373e-09	8.24107e-08	11.7991
RPS16	-1.29494	13.162	-7.31415	1.30109e-09	8.26998e-08	11.7936
RPL14	-1.1818	13.5827	-7.31131	1.31494e-09	8.33989e-08	11.7833
ZNF37CP	-1.3516	0.445687	-7.31043	1.31926e-09	8.34926e-08	11.7801
IGLV2-14	2.97265	12.2594	7.30758	1.33337e-09	8.42033e-08	11.7697
PNPLA1	2.01193	8.16482	7.30549	1.3438e-09	8.46793e-08	11.7621
EEF1A1P9	-2.16318	4.29652	-7.30324	1.35511e-09	8.52093e-08	11.7539
EAF2	1.52958	9.10514	7.3003	1.37007e-09	8.59652e-08	11.7432
IGBP1	-0.548249	11.1521	-7.2993	1.37517e-09	8.59962e-08	11.7396
MAP2K6	1.63752	9.89184	7.29906	1.37643e-09	8.59962e-08	11.7387
RPL36AP13	-1.38442	0.596121	-7.29646	1.38984e-09	8.66493e-08	11.7292
TEF	-1.44558	7.7934	-7.29463	1.39936e-09	8.70574e-08	11.7225
MT-CO2	-0.954446	16.101	-7.29218	1.41219e-09	8.76697e-08	11.7136
C2orf15	-1.29116	4.7538	-7.28513	1.44986e-09	8.98175e-08	11.688
EEF1A1P4	-1.69575	3.69389	-7.28332	1.45969e-09	9.02357e-08	11.6814
KIF18A	1.34427	6.83594	7.28196	1.46712e-09	9.05045e-08	11.6764
AL031777.1	2.39027	6.77777	7.27892	1.48383e-09	9.13431e-08	11.6654
KCTD7	-0.900036	9.32726	-7.2719	1.52324e-09	9.35725e-08	11.6398
QPCT	1.19256	12.5339	7.26986	1.53488e-09	9.409e-08	11.6324
HLA-DPB1	-1.77915	12.4425	-7.26843	1.54309e-09	9.4396e-08	11.6272
ZNF582	-1.08793	6.3022	-7.26692	1.55177e-09	9.47288e-08	11.6217
FUNDC2	-0.776388	10.2295	-7.26596	1.55737e-09	9.48734e-08	11.6182
CEP295NL	1.58759	4.52545	7.26182	1.5816e-09	9.61495e-08	11.6031
MTERF4	-0.670349	9.97348	-7.25703	1.61011e-09	9.768e-08	11.5857
TIMM10B	-0.750834	9.73618	-7.25554	1.61912e-09	9.80236e-08	11.5802
FBXO25	-0.668588	9.17288	-7.25384	1.62938e-09	9.83685e-08	11.5741
PFN2	-1.86865	5.80252	-7.25296	1.63477e-09	9.83685e-08	11.5709
EDEM2	0.60176	11.0022	7.25241	1.63813e-09	9.83685e-08	11.5688
ATP6V1G1	-0.599242	11.6403	-7.25239	1.63824e-09	9.83685e-08	11.5688
FANCA	1.05532	9.15226	7.25071	1.64854e-09	9.87842e-08	11.5627
H2BW2	-1.59689	2.88086	-7.25001	1.65288e-09	9.88423e-08	11.5601
H2BC12	1.63696	9.84954	7.24919	1.65792e-09	9.89418e-08	11.5571
DNASE1L3	-1.70642	4.96303	-7.24623	1.67631e-09	9.95929e-08	11.5464
CD47	-0.772586	12.6582	-7.24593	1.67821e-09	9.95929e-08	11.5453
ST13	-0.907837	11.2281	-7.24578	1.67918e-09	9.95929e-08	11.5447
DENND1A	0.836427	10.5096	7.24526	1.68243e-09	9.95929e-08	11.5428
RPS3AP21	-2.18121	2.70741	-7.2434	1.69416e-09	1.00085e-07	11.536
AC006946.1	2.4022	3.71402	7.23764	1.73092e-09	1.02051e-07	11.5151
ZNF529	-1.12329	8.78747	-7.23117	1.77325e-09	1.04337e-07	11.4915
KCND1	1.89814	8.2717	7.21892	1.85616e-09	1.08561e-07	11.4469
PDCD4	-1.10225	12.3164	-7.21791	1.86318e-09	1.08755e-07	11.4433
TASP1	-1.03683	7.13835	-7.21647	1.87322e-09	1.09123e-07	11.438
YY1	-0.541183	12.2554	-7.21576	1.87821e-09	1.09197e-07	11.4354
EEF1G	-1.26464	15.091	-7.21497	1.88374e-09	1.09302e-07	11.4326
PATZ1	-0.831713	9.88247	-7.21157	1.9078e-09	1.10479e-07	11.4202
RPL29	-1.0899	13.5112	-7.20748	1.93713e-09	1.11867e-07	11.4053
SLC1A3	3.15664	7.60978	7.20717	1.93941e-09	1.11867e-07	11.4041
PIAS4	0.66907	9.42099	7.20417	1.96123e-09	1.12903e-07	11.3932
MAPK8	-0.605524	9.59214	-7.20349	1.96618e-09	1.12967e-07	11.3908
AC025459.1	-0.978591	0.276918	-7.20026	1.99003e-09	1.14113e-07	11.379
RPS3AP5	-2.29092	2.93369	-7.19614	2.02092e-09	1.15658e-07	11.364
ORMDL1	-0.595226	11.0457	-7.19197	2.05257e-09	1.17241e-07	11.3488
PSTK	-0.75579	6.31737	-7.18452	2.11048e-09	1.20169e-07	11.3217
CRY1	-0.909813	8.73948	-7.18432	2.11205e-09	1.20169e-07	11.321
IPO5P1	-1.19163	6.96296	-7.17911	2.15353e-09	1.22292e-07	11.302
POLE2	1.30963	6.43734	7.17715	2.16931e-09	1.2295e-07	11.2949
APBA1	-2.08477	4.19017	-7.17572	2.18091e-09	1.23369e-07	11.2897
RPL27A	-1.26658	13.8149	-7.17036	2.22497e-09	1.25502e-07	11.2702
ANXA2R	-1.22812	8.1822	-7.1701	2.22719e-09	1.25502e-07	11.2692
COL5A1	-2.13435	3.24334	-7.16673	2.25538e-09	1.26847e-07	11.2569
ZNF211	-0.682066	9.30318	-7.16521	2.26821e-09	1.27324e-07	11.2514
IGHV3-74	2.583	9.9675	7.16166	2.29844e-09	1.28774e-07	11.2385
WDR70	-0.542878	9.25749	-7.16014	2.31153e-09	1.28782e-07	11.2329
MXRA8	-1.41738	5.17638	-7.16012	2.31167e-09	1.28782e-07	11.2329
TRBV6-4	-2.8927	3.39165	-7.16011	2.31177e-09	1.28782e-07	11.2328
CLIC5	-1.82149	6.45753	-7.15551	2.35182e-09	1.30765e-07	11.2161
PPP2R5C	-0.65052	13.007	-7.15239	2.37931e-09	1.32043e-07	11.2047
HNRNPUL2-BSCL2	1.20478	10.8615	7.14858	2.41342e-09	1.33682e-07	11.1908
HINT1	-0.926008	11.1921	-7.14651	2.43213e-09	1.34464e-07	11.1833
RPA2	-0.619223	11.0989	-7.14509	2.44504e-09	1.34924e-07	11.1781
CDC14A	-1.157	9.79084	-7.13584	2.53092e-09	1.394e-07	11.1445
PDE3B	-1.04645	11.0542	-7.13215	2.56604e-09	1.4107e-07	11.131
PKHD1L1	2.26218	7.75005	7.1313	2.57425e-09	1.41256e-07	11.1279
PAIP2B	-1.13597	7.54135	-7.1292	2.59444e-09	1.42098e-07	11.1203
RPL3P3	-1.17901	0.424152	-7.12743	2.61162e-09	1.42772e-07	11.1139
ADAM9	1.42633	10.7063	7.12636	2.62216e-09	1.43081e-07	11.1099
LRRN3	-3.54933	7.21551	-7.125	2.63544e-09	1.43498e-07	11.105
AC090498.1	-1.65764	4.51626	-7.12458	2.63959e-09	1.43498e-07	11.1035
GMNN	1.18935	8.26157	7.12353	2.64997e-09	1.43795e-07	11.0996
RPS28	-1.29685	11.9979	-7.12212	2.66392e-09	1.44285e-07	11.0945
MET	2.44568	5.41414	7.12024	2.68275e-09	1.44843e-07	11.0876
TNFAIP8	-0.70975	12.3354	-7.1201	2.68411e-09	1.44843e-07	11.0872
RTEL1P1	2.4403	4.09932	7.11783	2.70694e-09	1.45807e-07	11.0789
TES	-0.58494	12.0831	-7.11721	2.71322e-09	1.45877e-07	11.0766
WDR59	-0.503695	9.81949	-7.11663	2.71905e-09	1.45922e-07	11.0745
GYG1	1.41541	12.1291	7.11465	2.73926e-09	1.46416e-07	11.0673
FAAHP1	-1.80277	4.5806	-7.11438	2.74207e-09	1.46416e-07	11.0663
RAD1	-0.556673	8.94132	-7.11426	2.74325e-09	1.46416e-07	11.0659
C12orf73	-0.601401	6.6118	-7.10308	2.8601e-09	1.52284e-07	11.0252
GBA	1.08749	11.9058	7.10276	2.86357e-09	1.52284e-07	11.024
COMMD6	-0.979417	10.0862	-7.1008	2.88464e-09	1.53008e-07	11.0169
RPS5	-1.30688	12.6833	-7.10052	2.88764e-09	1.53008e-07	11.0159
IGHV1-24	5.48502	9.93357	7.09798	2.91512e-09	1.54186e-07	11.0066
FBXL19	0.836728	8.93685	7.09639	2.93248e-09	1.54824e-07	11.0008
IGLC3	3.18554	14.3497	7.09286	2.97141e-09	1.56598e-07	10.988
DHFR	1.18517	10.5513	7.08275	3.0857e-09	1.62329e-07	10.9512
RAB40B	-0.90323	5.99856	-7.07568	3.1682e-09	1.6637e-07	10.9254
RPL7A	-1.17518	14.5499	-7.0749	3.17739e-09	1.66555e-07	10.9226
AC022034.2	-2.24546	1.34697	-7.07274	3.20313e-09	1.67604e-07	10.9147
IGLV1-51	3.44939	11.45	7.07004	3.23556e-09	1.68999e-07	10.9049
FAHD2CP	-1.36489	5.39114	-7.06605	3.28415e-09	1.71088e-07	10.8904
EEF1A1P5	-1.7325	9.53592	-7.06579	3.28724e-09	1.71088e-07	10.8894
SS18L2	-0.560277	8.83294	-7.06384	3.31129e-09	1.72034e-07	10.8823
CLYBL	-1.16382	6.70742	-7.06155	3.33968e-09	1.72944e-07	10.874
HLA-DPB2	-2.11359	2.94698	-7.06148	3.3406e-09	1.72944e-07	10.8737
HLF	-2.04151	4.41618	-7.05097	3.47424e-09	1.7903e-07	10.8355
ATF7IP2	-1.01932	8.61667	-7.05073	3.47733e-09	1.7903e-07	10.8346
MUC1	1.82943	6.66233	7.05072	3.47756e-09	1.7903e-07	10.8346
RABL2B	-0.624155	9.55242	-7.05033	3.48261e-09	1.7903e-07	10.8331
THAP12	-0.857004	11.4214	-7.04535	3.54793e-09	1.82069e-07	10.815
RPL18	-1.2235	13.379	-7.04446	3.55969e-09	1.82244e-07	10.8118
IGLV3-10	4.43528	9.74014	7.04415	3.56379e-09	1.82244e-07	10.8107
IGHV3-23	3.45088	12.2377	7.04351	3.57233e-09	1.82363e-07	10.8083
LYPD1	-1.61305	0.515005	-7.03953	3.62584e-09	1.84773e-07	10.7938
ADAM12	-2.14382	5.05844	-7.03664	3.6651e-09	1.86449e-07	10.7833
PGAP3	-0.932185	8.48585	-7.03544	3.68166e-09	1.8671e-07	10.7789
BCL6	1.79358	14.7447	7.03534	3.68297e-09	1.8671e-07	10.7786
IGLV4-69	3.86591	9.84462	7.03063	3.74834e-09	1.89696e-07	10.7614
ZNF662	-1.47584	4.99216	-7.02709	3.79817e-09	1.91886e-07	10.7485
SRSF11	-0.76081	12.2266	-7.02276	3.86001e-09	1.94345e-07	10.7328
TRAV12-1	-2.02053	5.66439	-7.02275	3.86011e-09	1.94345e-07	10.7328
CDC42BPA	1.67008	7.17286	7.01447	3.98126e-09	2.00101e-07	10.7026
FNDC3B	0.956765	12.1951	7.00989	4.04994e-09	2.03204e-07	10.6859
CA5B	-0.898981	9.59115	-7.00712	4.09208e-09	2.04968e-07	10.6759
EIF4G3	0.788056	11.7548	7.0057	4.11376e-09	2.05702e-07	10.6707
IGKV4-1	2.80973	12.3677	7.00389	4.14165e-09	2.06744e-07	10.6641
TM9SF1	0.645171	10.0361	7.00037	4.19647e-09	2.09083e-07	10.6513
H2AC17	2.64555	3.24939	6.99997	4.20279e-09	2.09083e-07	10.6498
NDC80	1.06691	8.48134	6.99849	4.22607e-09	2.09885e-07	10.6444
ARSB	0.823696	10.2853	6.98185	4.49686e-09	2.22956e-07	10.5839
PCID2	-0.678722	9.94984	-6.98136	4.505e-09	2.22982e-07	10.5821
FAM72C	2.94403	5.65453	6.97855	4.5525e-09	2.24953e-07	10.5719
SRSF6	-0.653922	12.0672	-6.97609	4.59452e-09	2.26647e-07	10.5629
ELP2	-0.871369	10.4559	-6.97083	4.68567e-09	2.30756e-07	10.5438
SYPL1	-0.793525	10.8808	-6.96601	4.77064e-09	2.34546e-07	10.5262
RPS21	-1.14315	10.8897	-6.96448	4.79791e-09	2.34937e-07	10.5207
METTL18	-0.885749	8.12608	-6.96431	4.80095e-09	2.34937e-07	10.5201
DNAJB1	-0.846531	11.373	-6.96422	4.80266e-09	2.34937e-07	10.5197
TP53RK	-0.703508	9.58969	-6.95622	4.94813e-09	2.4165e-07	10.4906
TMEM117	-1.4794	5.14817	-6.95518	4.96749e-09	2.41898e-07	10.4868
SBDS	-0.738218	10.1427	-6.95506	4.96972e-09	2.41898e-07	10.4864
IGLV3-25	4.10384	11.5665	6.95001	5.06425e-09	2.45683e-07	10.468
AJAP1	-2.2811	3.19356	-6.9489	5.08527e-09	2.46295e-07	10.464
AC090013.1	-1.57877	0.771878	-6.94808	5.10078e-09	2.46639e-07	10.461
NEK6	1.20314	10.6623	6.94487	5.16228e-09	2.49201e-07	10.4493
IL24	-1.64924	9.30598	-6.94307	5.19714e-09	2.50471e-07	10.4427
NTN4	-2.81445	3.81484	-6.94141	5.22939e-09	2.51612e-07	10.4367
ZNF571	-0.767484	7.46171	-6.93857	5.28504e-09	2.53872e-07	10.4264
IGLV1-36	3.94342	5.35519	6.93574	5.34124e-09	2.55694e-07	10.4161
CHMP7	-0.89623	11.4341	-6.93559	5.34415e-09	2.55694e-07	10.4155
DMC1	1.80911	4.68697	6.93534	5.34915e-09	2.55694e-07	10.4146
RNF144A	-1.17576	9.48705	-6.93216	5.41307e-09	2.58328e-07	10.403
SLC7A5	1.7542	10.5039	6.9281	5.49561e-09	2.61416e-07	10.3883
RCAN3	-1.79225	11.1769	-6.92408	5.57866e-09	2.64937e-07	10.3737
STIM2	-0.620742	10.471	-6.92264	5.60885e-09	2.65939e-07	10.3684
HMGB3	1.96096	8.4372	6.91943	5.67632e-09	2.68703e-07	10.3567
IGKV3-15	2.84611	11.5794	6.91239	5.82745e-09	2.7523e-07	10.3311
RACK1	-1.05672	14.5852	-6.91211	5.83367e-09	2.7523e-07	10.3301
S100A8	1.73686	16.7769	6.91171	5.84236e-09	2.7523e-07	10.3286
IFT43	-0.836114	6.41812	-6.90989	5.88218e-09	2.76661e-07	10.322
ADAMTS2	5.55896	8.12616	6.90745	5.93592e-09	2.78741e-07	10.3131
MAP3K14	-0.606089	10.2564	-6.90385	6.01615e-09	2.82056e-07	10.3
SPATA7	-1.16695	5.76133	-6.90168	6.06512e-09	2.83898e-07	10.2921
IGLV1-47	3.11836	11.0982	6.89577	6.20025e-09	2.8976e-07	10.2707
ZBTB44	-0.724879	11.6627	-6.89383	6.24531e-09	2.90976e-07	10.2636
NSMCE3	-0.783808	9.38647	-6.8938	6.24613e-09	2.90976e-07	10.2635
DHCR24	1.65563	9.83174	6.89221	6.28328e-09	2.92242e-07	10.2577
RPL21P131	-1.02717	0.298902	-6.89039	6.32611e-09	2.93768e-07	10.2511
ST3GAL2	1.00005	11.7154	6.88971	6.34208e-09	2.93808e-07	10.2486
IGHV3-43	3.40569	8.24027	6.8895	6.34702e-09	2.93808e-07	10.2478
ZNF345	-0.876498	7.46307	-6.88896	6.35999e-09	2.93944e-07	10.2459
TECPR2	1.2989	12.1922	6.8867	6.41383e-09	2.95965e-07	10.2376
CENPN	1.00305	7.51322	6.88596	6.43144e-09	2.96311e-07	10.235
CTSA	0.927209	13.6254	6.88501	6.45429e-09	2.96897e-07	10.2315
ZFP36L2	-0.995134	13.7267	-6.88107	6.54981e-09	3.00819e-07	10.2172
IFI27L1	1.51536	7.04072	6.87885	6.60452e-09	3.02857e-07	10.2091
OSCAR	1.29194	11.7252	6.87656	6.66112e-09	3.04975e-07	10.2007
FCAR	1.80468	11.5077	6.87609	6.67287e-09	3.05037e-07	10.199
IGHV1-18	3.84974	10.8333	6.87161	6.78525e-09	3.09413e-07	10.1827
ZNF131	-0.654534	10.0391	-6.87143	6.78972e-09	3.09413e-07	10.1821
SRSF7	-0.716012	11.6138	-6.8672	6.89781e-09	3.1385e-07	10.1667
GUSBP1	-0.99668	7.27404	-6.86409	6.97839e-09	3.17024e-07	10.1554
EME1	1.41353	5.8961	6.86329	6.99905e-09	3.17471e-07	10.1525
AC108161.1	-1.56237	0.661	-6.86202	7.03243e-09	3.18492e-07	10.1479
SH2B2	1.1058	9.45238	6.8616	7.04356e-09	3.18504e-07	10.1463
KREMEN1	2.32086	11.3738	6.85879	7.11756e-09	3.21354e-07	10.1361
PLPP3	1.80896	6.90622	6.85306	7.27143e-09	3.27634e-07	10.1153
DGCR6	-1.08249	5.75029	-6.85278	7.27901e-09	3.27634e-07	10.1143
IGSF23	-2.46119	1.36322	-6.85138	7.31725e-09	3.28368e-07	10.1092
CFL2	-0.882691	7.59766	-6.85136	7.31773e-09	3.28368e-07	10.1091
SLC7A6	-1.40915	10.5215	-6.84965	7.36452e-09	3.29962e-07	10.1029
EID3	-1.42124	6.03443	-6.84693	7.43973e-09	3.32373e-07	10.093
CAMKMT	-0.530264	7.0047	-6.84688	7.44101e-09	3.32373e-07	10.0928
KBTBD3	-0.831149	6.68893	-6.8449	7.4962e-09	3.34328e-07	10.0856
EEF1A1P14	-1.83912	2.74318	-6.84441	7.50984e-09	3.34427e-07	10.0838
ZNF10	-1.16069	7.14546	-6.84185	7.58205e-09	3.37131e-07	10.0745
HLA-DMA	-1.24902	11.3538	-6.83985	7.63868e-09	3.39134e-07	10.0672
FKBP9	1.68114	8.36278	6.83799	7.69199e-09	3.39696e-07	10.0605
MND1	1.98016	5.44934	6.83793	7.69362e-09	3.39696e-07	10.0603
IGLJ2	3.12827	7.6658	6.83779	7.6977e-09	3.39696e-07	10.0597
PLEKHA1	-1.35642	9.96453	-6.83705	7.71896e-09	3.40122e-07	10.0571
GPD1L	-0.760806	9.4658	-6.8316	7.87767e-09	3.46052e-07	10.0372
ZNF383	-0.771207	8.73656	-6.83121	7.88897e-09	3.46052e-07	10.0358
PROCR	-1.6351	4.57644	-6.83043	7.9119e-09	3.46539e-07	10.033
IL10RA	-1.05657	12.9935	-6.82855	7.96778e-09	3.48163e-07	10.0261
AUNIP	1.55024	5.55737	6.82838	7.97276e-09	3.48163e-07	10.0255
IGKV2-28	3.0075	8.92077	6.8278	7.99001e-09	3.48398e-07	10.0234
PGD	1.191	14.431	6.82678	8.02058e-09	3.49211e-07	10.0197
TMEM203	-0.556836	9.45372	-6.82256	8.14771e-09	3.54088e-07	10.0044
SLC37A1	0.659503	9.66017	6.82226	8.15676e-09	3.54088e-07	10.0033
TRAV1-2	-2.707	5.49083	-6.81953	8.24024e-09	3.57183e-07	9.99334
CLNS1A	-0.804689	10.9173	-6.81907	8.25456e-09	3.57275e-07	9.99165
TMEM150A	-0.765207	7.54535	-6.8152	8.3745e-09	3.61073e-07	9.97759
PIK3R1	-1.05171	12.0282	-6.81505	8.37928e-09	3.61073e-07	9.97703
ABHD14B	-0.867389	10.2848	-6.81441	8.39934e-09	3.61406e-07	9.9747
TMEM267	-1.06694	7.58395	-6.81018	8.53273e-09	3.66607e-07	9.95934
RPL3	-1.38491	15.059	-6.80596	8.66812e-09	3.71879e-07	9.944
P2RY8	-0.77386	12.1257	-6.80506	8.69718e-09	3.7258e-07	9.94073
HK3	1.54895	13.1544	6.80452	8.71485e-09	3.72792e-07	9.93875
H4C9	1.51119	9.26252	6.8035	8.74801e-09	3.73665e-07	9.93505
FOXP1	-0.612467	11.5772	-6.80281	8.77062e-09	3.74085e-07	9.93254
INAVA	2.11675	5.29566	6.80237	8.78506e-09	3.74157e-07	9.93093
MCMDC2	-0.99157	7.63869	-6.79803	8.92845e-09	3.79712e-07	9.91515
KIAA1191	-0.502045	10.4952	-6.79599	8.99663e-09	3.82057e-07	9.90773
FZD5	1.64784	7.00519	6.79432	9.05285e-09	3.83888e-07	9.90166
PPHLN1	-0.516848	10.9774	-6.7917	9.14158e-09	3.87091e-07	9.89215
URI1	-0.926763	10.705	-6.78918	9.22811e-09	3.89628e-07	9.88297
SH2D1A	-1.91466	9.71237	-6.78776	9.27694e-09	3.91127e-07	9.87783
FAM102A	-1.77651	11.158	-6.78675	9.31216e-09	3.91559e-07	9.87413
RPL12P6	-1.26374	0.363279	-6.78669	9.31393e-09	3.91559e-07	9.87395
IGLV2-11	2.82474	10.7826	6.78588	9.34235e-09	3.92017e-07	9.87098
MTARC1	1.63256	11.6162	6.78491	9.37629e-09	3.92017e-07	9.86744
N6AMT1	-0.832607	7.26764	-6.78485	9.37833e-09	3.92017e-07	9.86723
CDKN1A	1.21033	10.4288	6.78395	9.4098e-09	3.92772e-07	9.86396
SLC7A11	1.3104	6.97252	6.78281	9.44984e-09	3.93882e-07	9.85983
ZNF181	-1.00988	8.13524	-6.77857	9.60053e-09	3.99442e-07	9.8444
PASK	-1.29828	9.29457	-6.77829	9.61049e-09	3.99442e-07	9.84339
IGHV3-15	3.56585	10.1953	6.77595	9.69476e-09	4.01943e-07	9.83488
PLIN3	1.02216	11.6578	6.77586	9.69811e-09	4.01943e-07	9.83455
WDR82	-0.733769	12.9866	-6.77444	9.7495e-09	4.03108e-07	9.8294
RGMA	1.32118	6.28751	6.77432	9.75373e-09	4.03108e-07	9.82897
PLEC	0.948566	13.4038	6.771	9.8752e-09	4.07554e-07	9.81691
LMBRD1	-0.690924	11.0738	-6.76986	9.91739e-09	4.08719e-07	9.81275
SPEF2	-1.41972	6.79737	-6.76915	9.94384e-09	4.09234e-07	9.81016
SRSF8	-0.919135	10.4362	-6.76498	1.00996e-08	4.15059e-07	9.79501
H4C8	2.13284	7.19178	6.76002	1.02882e-08	4.22219e-07	9.77697
PAFAH2	-0.849114	9.4649	-6.75945	1.03101e-08	4.22527e-07	9.7749
EIF3M	-0.794546	11.9556	-6.75865	1.03407e-08	4.2319e-07	9.77201
IGHV4-39	3.6301	10.5397	6.757	1.04045e-08	4.25208e-07	9.76601
HRH2	1.76728	11.2479	6.75526	1.04723e-08	4.27382e-07	9.75968
ACSL1	1.60413	15.5926	6.75404	1.05202e-08	4.2874e-07	9.75523
RALGAPA2	1.20588	12.1265	6.7536	1.05375e-08	4.28848e-07	9.75363
TSN	-0.526924	10.943	-6.75179	1.06088e-08	4.31148e-07	9.74707
ARL14EP	-1.09477	9.49743	-6.74134	1.10304e-08	4.47663e-07	9.70908
PRSS22	-2.25864	1.33434	-6.73357	1.13544e-08	4.59541e-07	9.68086
EEF1D	-0.830641	13.2179	-6.73104	1.14622e-08	4.63263e-07	9.67165
SPATA20P1	2.63119	3.49952	6.72757	1.16112e-08	4.68637e-07	9.65907
SIGLEC17P	-1.69368	6.75361	-6.72443	1.17479e-08	4.73502e-07	9.64766
EIF3F	-0.741233	8.10293	-6.72325	1.18e-08	4.74948e-07	9.64335
CLPB	0.864814	8.93058	6.7209	1.19036e-08	4.78464e-07	9.63482
PRC1	1.51042	8.89101	6.71964	1.19596e-08	4.80054e-07	9.63025
STMN3	-1.50582	8.97455	-6.71902	1.19871e-08	4.80502e-07	9.62801
RRAGD	1.04989	10.4628	6.71845	1.20128e-08	4.80874e-07	9.62592
PLXDC1	-1.91752	7.03916	-6.71714	1.20717e-08	4.82571e-07	9.62116
GPR27	1.46928	10.6302	6.71358	1.22327e-08	4.88342e-07	9.60824
CDKN3	1.7063	6.85559	6.70647	1.25613e-08	5.00779e-07	9.58241
DOK3	1.16088	13.72	6.70528	1.26172e-08	5.02321e-07	9.57809
NUBPL	-0.829873	7.01972	-6.70374	1.269e-08	5.04534e-07	9.57248
RPL35	-1.13707	12.6947	-6.7009	1.28249e-08	5.09206e-07	9.56217
RPS2	-1.15374	14.6596	-6.69768	1.29798e-08	5.14659e-07	9.55047
NUDT13	-1.13948	5.90281	-6.69052	1.33308e-08	5.27863e-07	9.52447
EXTL2	-1.00703	6.41653	-6.68992	1.33606e-08	5.28331e-07	9.52229
AC116353.5	1.8375	6.84488	6.68755	1.34794e-08	5.3231e-07	9.51366
SMYD2	-0.576412	9.15246	-6.68598	1.35581e-08	5.34698e-07	9.50799
SRPK1	1.15586	12.4805	6.68544	1.35858e-08	5.3507e-07	9.506
CD38	1.7105	11.2447	6.68339	1.36901e-08	5.38451e-07	9.49855
PLPPR4	-1.24288	0.325373	-6.68236	1.37427e-08	5.3923e-07	9.49481
MMP9	3.39248	13.8864	6.68224	1.37486e-08	5.3923e-07	9.49439
XRCC2	0.989204	7.0401	6.68192	1.37651e-08	5.3923e-07	9.49323
RPL11P3	2.09624	3.15314	6.67969	1.388e-08	5.43007e-07	9.48512
NT5DC2	2.10688	8.93463	6.6782	1.39571e-08	5.45079e-07	9.47972
FANCI	1.15561	9.52877	6.67795	1.39702e-08	5.45079e-07	9.47881
RPSA	-1.30176	14.1935	-6.67397	1.41788e-08	5.51695e-07	9.46437
RPS19	-1.10549	13.5581	-6.67354	1.42019e-08	5.51695e-07	9.46278
ATXN7L3B	-0.682748	11.7385	-6.67349	1.42043e-08	5.51695e-07	9.46262
MT-ND6	-1.19737	14.2999	-6.67329	1.42151e-08	5.51695e-07	9.46188
CEP68	-0.867921	9.5042	-6.67238	1.42633e-08	5.52834e-07	9.45858
NLRP4	-1.9045	0.870531	-6.66856	1.44677e-08	5.60015e-07	9.44471
TAF1D	-0.523986	10.9547	-6.65996	1.49387e-08	5.77485e-07	9.41349
PRKCB	0.653219	11.3306	6.65663	1.51255e-08	5.83938e-07	9.40138
FABP5P7	1.38535	7.82433	6.65016	1.54942e-08	5.97385e-07	9.37791
LPXN	-0.842215	11.7081	-6.64916	1.55524e-08	5.98161e-07	9.37426
DYRK2	-1.7252	10.833	-6.64863	1.5583e-08	5.98161e-07	9.37235
FITM2	-0.676764	7.67057	-6.64862	1.55834e-08	5.98161e-07	9.37232
GRPEL2	-0.752404	9.17353	-6.64841	1.5596e-08	5.98161e-07	9.37153
IL23R	-2.45384	2.37218	-6.64592	1.57412e-08	6.02938e-07	9.36251
PTGER4	-0.856474	10.3665	-6.64276	1.59278e-08	6.09291e-07	9.35102
IGHV1-46	3.54345	9.89391	6.64073	1.60482e-08	6.13095e-07	9.34368
ITPKB	-0.745304	12.0331	-6.64016	1.60829e-08	6.1362e-07	9.34158
KMT5A	0.753008	10.186	6.63877	1.61661e-08	6.15993e-07	9.33655
BRCA2	1.20331	8.25957	6.63798	1.62138e-08	6.16419e-07	9.33368
MT-ND2	-1.11858	16.1271	-6.63784	1.62219e-08	6.16419e-07	9.33319
ZNF32	-1.23442	8.23566	-6.63754	1.62404e-08	6.16419e-07	9.33208
UNC5A	1.82627	4.97554	6.6352	1.63825e-08	6.21011e-07	9.32359
ATP6V0A1	0.595943	11.4574	6.62726	1.68741e-08	6.38817e-07	9.29479
C1GALT1C1	0.502535	9.9869	6.62626	1.69376e-08	6.39599e-07	9.29113
EID1	-0.689299	11.1906	-6.62601	1.69531e-08	6.39599e-07	9.29024
HIBADH	-0.868081	8.53186	-6.62541	1.69909e-08	6.39599e-07	9.28807
SPON1	-2.36649	4.86496	-6.62532	1.69966e-08	6.39599e-07	9.28774
KLHL32	-1.76423	4.46908	-6.62521	1.70039e-08	6.39599e-07	9.28732
IGLV6-57	3.68471	10.0959	6.62464	1.70399e-08	6.40132e-07	9.28526
NOG	-3.19561	4.9349	-6.62237	1.71843e-08	6.44731e-07	9.27703
PLOD1	0.956914	11.5685	6.61657	1.75597e-08	6.57647e-07	9.25598
ZCCHC14	-0.73243	9.15555	-6.61636	1.75735e-08	6.57647e-07	9.25522
DCANP1	-3.7282	3.00294	-6.61236	1.78376e-08	6.66679e-07	9.24068
MED12	0.529495	11.8285	6.60623	1.82494e-08	6.81204e-07	9.21844
TMC8	-0.87577	12.5749	-6.59983	1.86894e-08	6.96737e-07	9.19523
CENPI	1.27712	6.05498	6.59945	1.87161e-08	6.96849e-07	9.19384
ZNF277	-0.693955	9.32013	-6.5981	1.88104e-08	6.99469e-07	9.18895
AL162615.1	1.6684	2.64584	6.59724	1.88704e-08	7.00813e-07	9.18584
IGLV2-23	3.02848	10.5108	6.59655	1.89189e-08	7.01722e-07	9.18334
TTLL1	-0.927346	7.01889	-6.59505	1.9025e-08	7.04768e-07	9.17789
AC104619.3	-2.02071	2.82972	-6.59148	1.92794e-08	7.1329e-07	9.16495
NOP53	-1.26592	12.477	-6.58987	1.93953e-08	7.16672e-07	9.15911
MAOB	3.31894	5.5748	6.58855	1.94914e-08	7.19315e-07	9.1543
CNOT7	-0.733608	11.6292	-6.58762	1.95585e-08	7.20884e-07	9.15095
PSMC3IP	1.12526	6.41829	6.58441	1.9794e-08	7.28646e-07	9.13929
RWDD1	-0.521433	9.98962	-6.58104	2.00436e-08	7.3691e-07	9.12708
CNOT6L	-1.04078	12.0259	-6.57975	2.01402e-08	7.39535e-07	9.12239
SBNO2	1.19002	12.6971	6.57873	2.0217e-08	7.40125e-07	9.11869
ZNF606	-0.723124	8.04955	-6.57866	2.02221e-08	7.40125e-07	9.11844
GTF3A	-0.776389	11.7941	-6.57853	2.02321e-08	7.40125e-07	9.11796
SLC1A4	1.37356	10.2402	6.57776	2.02904e-08	7.41334e-07	9.11515
CHST15	0.724858	13.5375	6.57721	2.03319e-08	7.41343e-07	9.11317
DPRXP2	2.57111	3.70231	6.57709	2.03413e-08	7.41343e-07	9.11272
WDFY3	1.30259	12.4752	6.57376	2.05949e-08	7.49655e-07	9.10064
NBEAL2	0.989476	14.4593	6.56876	2.09812e-08	7.6277e-07	9.08254
ZNF875	-0.838912	9.05808	-6.5663	2.11748e-08	7.68853e-07	9.07359
DGKA	-0.982672	12.3105	-6.56585	2.12104e-08	7.69192e-07	9.07196
ARHGAP18	0.811032	10.2781	6.56414	2.13458e-08	7.73147e-07	9.06576
LIPT1	-0.905506	7.35676	-6.56377	2.13746e-08	7.73235e-07	9.06444
PPIE	-0.519016	9.77226	-6.56344	2.14015e-08	7.73252e-07	9.06322
CD52	-1.33021	12.7737	-6.56226	2.14954e-08	7.75686e-07	9.05896
MTFR2	1.1444	6.61239	6.56076	2.16156e-08	7.79067e-07	9.05352
HLA-DPA1	-1.62693	13.0634	-6.56038	2.16463e-08	7.79215e-07	9.05214
UBN1	0.679795	13.0962	6.55839	2.18072e-08	7.84044e-07	9.04492
AC087343.1	-1.919	1.97817	-6.55738	2.18896e-08	7.8604e-07	9.04125
MYLK4	-1.07659	5.29812	-6.55672	2.19436e-08	7.87014e-07	9.03885
KLHL36	-0.629473	10.8604	-6.55532	2.20579e-08	7.90148e-07	9.03379
MRPL50	-0.753562	9.2386	-6.55435	2.21377e-08	7.91471e-07	9.03027
NR1D2	-1.61141	9.99334	-6.55422	2.21489e-08	7.91471e-07	9.02978
SEMA4A	1.17634	13.2192	6.55306	2.22444e-08	7.92952e-07	9.02559
IGIP	-1.3122	8.04586	-6.5519	2.23408e-08	7.9542e-07	9.02137
BBS2	-0.831418	9.76984	-6.54971	2.25233e-08	8.00942e-07	9.01345
C1orf112	0.553838	7.98691	6.54901	2.2582e-08	8.02057e-07	9.01091
MICU1	0.633322	11.4381	6.54806	2.26625e-08	8.03877e-07	9.00745
GPR84	2.91719	8.3159	6.54775	2.26881e-08	8.03877e-07	9.00635
LBH	-1.75213	12.1284	-6.54629	2.28124e-08	8.07307e-07	9.00102
LPO	1.77607	6.18768	6.54512	2.29114e-08	8.09832e-07	8.99681
CCDC65	-1.24734	7.59937	-6.53582	2.37188e-08	8.37358e-07	8.96307
IFI27	4.969	11.2609	6.53426	2.38567e-08	8.41213e-07	8.95742
CCDC150	1.04255	5.00198	6.5332	2.39513e-08	8.43534e-07	8.95357
IGHV5-51	3.13713	10.9581	6.53282	2.39847e-08	8.43696e-07	8.95221
C8orf33	-0.505032	9.39642	-6.5322	2.40403e-08	8.43735e-07	8.94996
SEPTIN7	-0.593504	12.987	-6.53217	2.40434e-08	8.43735e-07	8.94983
TBL1XR1	-0.609795	12.0778	-6.53151	2.41018e-08	8.44773e-07	8.94747
ADGRA3	-1.36651	5.757	-6.53113	2.41362e-08	8.44969e-07	8.94608
BTF3L4	-0.593702	10.2385	-6.5308	2.41655e-08	8.44985e-07	8.9449
TNFAIP8L3	2.86518	4.39707	6.53044	2.41983e-08	8.45124e-07	8.94357
DHFRP1	4.90709	4.44503	6.52744	2.44695e-08	8.53578e-07	8.93272
HLA-DRA	-1.72178	14.1889	-6.52705	2.45056e-08	8.53821e-07	8.93128
CEP57	-0.597154	10.6034	-6.52521	2.46739e-08	8.58664e-07	8.92461
GNPDA2	-0.933617	8.30616	-6.52337	2.48436e-08	8.63542e-07	8.91794
OTUD7A	-1.66955	4.58176	-6.52177	2.49917e-08	8.67662e-07	8.91215
CHAF1A	1.04585	9.12669	6.52077	2.50849e-08	8.69866e-07	8.90852
IGLC2	2.92592	15.4325	6.51711	2.54287e-08	8.80746e-07	8.89527
MRPS31P5	-0.934209	7.57014	-6.51677	2.54608e-08	8.80818e-07	8.89404
CERKL	-1.2118	11.325	-6.51184	2.5932e-08	8.96061e-07	8.87617
CXCR6	-2.093	7.61033	-6.51148	2.59671e-08	8.96217e-07	8.87486
TMEM50B	-0.702499	10.003	-6.50615	2.64873e-08	9.13094e-07	8.85554
H2AC18	2.46047	9.79947	6.50516	2.65845e-08	9.1494e-07	8.85197
EZH2	0.912981	9.18911	6.50497	2.66033e-08	9.1494e-07	8.85128
AC068946.2	2.79872	5.85443	6.50461	2.66391e-08	9.151e-07	8.84997
TUBG1	1.30141	8.97542	6.50247	2.68527e-08	9.20278e-07	8.84219
C1QC	2.54251	6.98486	6.50167	2.69326e-08	9.21889e-07	8.8393
OPLAH	2.51809	8.16949	6.50029	2.70713e-08	9.24525e-07	8.8343
IGKV1-33	3.21231	10.8745	6.49758	2.7345e-08	9.32785e-07	8.8245
STK17A	-0.674663	11.5855	-6.49388	2.77239e-08	9.44612e-07	8.81109
MIR1244-1	-4.3563	7.11628	-6.4912	2.80014e-08	9.5296e-07	8.80139
TXNDC5	2.80234	14.1871	6.49041	2.80839e-08	9.54657e-07	8.79853
SEZ6L	-3.63434	3.9248	-6.48556	2.85955e-08	9.70922e-07	8.78095
SCN1B	1.78143	8.04349	6.48514	2.86403e-08	9.71318e-07	8.77942
NTSR1	2.4065	7.04407	6.47896	2.93062e-08	9.92751e-07	8.75704
SCNN1B	2.35565	2.36638	6.47668	2.95556e-08	1.00005e-06	8.74878
PER3	-1.4438	7.44376	-6.46819	3.05034e-08	1.03092e-06	8.71804
BAG1	-1.95454	11.3032	-6.46651	3.06948e-08	1.0362e-06	8.71195
MRPS25	-0.554224	9.53018	-6.4653	3.08335e-08	1.03968e-06	8.70756
CD177	5.37819	11.1118	6.46272	3.1131e-08	1.04851e-06	8.69821
UQCRB	-0.675375	11.9678	-6.45869	3.16001e-08	1.06308e-06	8.68364
ARID3B	0.555193	11.0202	6.45202	3.23941e-08	1.08751e-06	8.65948
OR5K2	-1.95861	1.54938	-6.45197	3.24003e-08	1.08751e-06	8.65929
VMA21	-0.746398	10.1614	-6.44852	3.28185e-08	1.10028e-06	8.6468
DMAC1	-0.60514	8.48403	-6.44507	3.32414e-08	1.11195e-06	8.63433
TIMP2	0.739403	13.3738	6.44506	3.32425e-08	1.11195e-06	8.6343
COX4I1	-0.763814	12.6585	-6.4438	3.33992e-08	1.11592e-06	8.62972
PHF21A	0.894579	12.7036	6.44264	3.35434e-08	1.11903e-06	8.62553
FOLR2	-1.70788	5.57036	-6.44244	3.35685e-08	1.11903e-06	8.6248
TIMELESS	0.912954	9.60403	6.441	3.37479e-08	1.122e-06	8.61961
RPSAP8	-1.62265	0.802766	-6.44084	3.37683e-08	1.122e-06	8.61902
FBXL17	-0.830689	9.39496	-6.44081	3.37725e-08	1.122e-06	8.6189
INSL3	1.79863	7.08079	6.43751	3.41897e-08	1.13457e-06	8.60694
PAQR8	-0.989111	9.79023	-6.43585	3.44011e-08	1.1403e-06	8.60094
IGHJ5	2.94184	8.29184	6.43202	3.48945e-08	1.15534e-06	8.58707
CAMK2N1	-1.93413	5.29588	-6.43037	3.51081e-08	1.1611e-06	8.58113
EIF2B5	-0.684516	9.81412	-6.42761	3.54711e-08	1.17179e-06	8.57111
ZNF646	0.599251	10.8885	6.42516	3.57945e-08	1.18114e-06	8.56227
NMT2	-1.55353	8.54983	-6.42355	3.60095e-08	1.1869e-06	8.55644
CAV1	2.70229	7.12135	6.42323	3.60531e-08	1.187e-06	8.55527
IL4	-2.51496	1.56443	-6.42196	3.62232e-08	1.19126e-06	8.55068
IGHJ4	2.81496	8.96889	6.42141	3.62975e-08	1.19186e-06	8.54869
DRAM2	-0.585555	10.739	-6.42122	3.63227e-08	1.19186e-06	8.54801
CENPU	1.32691	8.0646	6.41972	3.65259e-08	1.19718e-06	8.54258
TGFBR2	-0.568318	13.4742	-6.41759	3.68159e-08	1.20534e-06	8.53488
MT-CO1	-0.911819	17.3427	-6.41723	3.68658e-08	1.20563e-06	8.53356
NIPSNAP1	-0.555686	9.7466	-6.41645	3.69729e-08	1.20778e-06	8.53074
ADAMTS5	-3.5369	3.2771	-6.41002	3.78672e-08	1.23448e-06	8.50746
BAMBI	2.54189	5.77483	6.40996	3.78745e-08	1.23448e-06	8.50728
FAM76A	-0.552091	8.54758	-6.40836	3.81011e-08	1.24049e-06	8.50147
VDR	0.804118	10.3057	6.40802	3.81488e-08	1.24066e-06	8.50025
CDC42SE2	-0.831872	13.2936	-6.40711	3.82783e-08	1.24349e-06	8.49695
FNBP4	-0.652615	11.398	-6.40582	3.8462e-08	1.24808e-06	8.49229
CBLL1	-0.622483	10.9394	-6.40516	3.8556e-08	1.24974e-06	8.48991
KLHL25	-0.919589	6.30087	-6.40313	3.88489e-08	1.25785e-06	8.48254
GATA6	-2.42641	1.85035	-6.40169	3.90569e-08	1.26219e-06	8.47734
TRAF5	-1.33759	9.95432	-6.40132	3.91104e-08	1.26219e-06	8.47601
MCM2	1.35847	10.0062	6.40131	3.91124e-08	1.26219e-06	8.47596
ARL6IP5	-0.639014	13.1677	-6.40061	3.92138e-08	1.26407e-06	8.47344
BUB3	-0.673311	11.3535	-6.39979	3.93333e-08	1.26653e-06	8.47048
AL109918.1	2.78011	5.86222	6.39943	3.93865e-08	1.26685e-06	8.46916
PABPC1	-1.00207	15.5486	-6.39835	3.95444e-08	1.27054e-06	8.46527
NR2C2AP	-0.803573	7.72248	-6.39691	3.9757e-08	1.27597e-06	8.46005
TRIP6	0.884775	7.77769	6.39623	3.98572e-08	1.27778e-06	8.4576
MYBPC3	1.78422	8.9912	6.39486	4.00605e-08	1.2815e-06	8.45264
SLC16A10	-1.07998	6.84706	-6.38982	4.08177e-08	1.30331e-06	8.43441
OLFM2	-1.64	6.80995	-6.38973	4.08314e-08	1.30331e-06	8.43408
ASTE1	-0.617494	9.04568	-6.38909	4.0929e-08	1.30496e-06	8.43176
LRRC75A	-1.09392	10.4293	-6.3888	4.09722e-08	1.30496e-06	8.43073
MCTP2	1.10897	12.5585	6.38723	4.12121e-08	1.31072e-06	8.42505
MTMR3	0.782196	13.4284	6.38703	4.12425e-08	1.31072e-06	8.42433
CDK20	-1.41271	5.53939	-6.38583	4.14271e-08	1.31516e-06	8.41998
P4HTM	-0.504656	8.64635	-6.38505	4.15466e-08	1.31651e-06	8.41718
ZNF559	-0.91432	9.05394	-6.38497	4.15592e-08	1.31651e-06	8.41688
FCGR1A	1.92176	11.5564	6.38415	4.16867e-08	1.31912e-06	8.4139
PARPBP	1.0826	7.08101	6.37979	4.23674e-08	1.33921e-06	8.39813
RPL21P93	-1.92975	1.46864	-6.37504	4.31217e-08	1.36012e-06	8.38095
CDHR3	-1.41043	4.79502	-6.37416	4.32625e-08	1.36309e-06	8.37778
RSL1D1	-0.967185	12.0215	-6.3735	4.33675e-08	1.36494e-06	8.37541
KLHL3	-1.52283	7.3	-6.37178	4.36453e-08	1.37221e-06	8.3692
ECI2	-0.735585	9.37776	-6.36976	4.3975e-08	1.38046e-06	8.36187
UXT	-0.764113	10.0539	-6.36959	4.40022e-08	1.38046e-06	8.36127
NGDN	-0.556782	9.38991	-6.36673	4.44724e-08	1.39372e-06	8.35092
IGLV8-61	2.35748	9.30958	6.36138	4.53651e-08	1.42018e-06	8.33157
BZW1	-0.628657	12.8002	-6.35992	4.56104e-08	1.42528e-06	8.32632
CD96	-1.7186	10.9458	-6.35984	4.56254e-08	1.42528e-06	8.326
IGHV3-33	3.61707	12.2707	6.35915	4.57426e-08	1.42742e-06	8.32351
CADM1	1.8939	5.65	6.3586	4.58349e-08	1.42862e-06	8.32154
TERT	2.58071	3.50725	6.35835	4.58785e-08	1.42862e-06	8.32062
KIAA1143	-0.717214	10.6149	-6.35623	4.6241e-08	1.43717e-06	8.31296
APEX1	-0.795931	11.3006	-6.35617	4.62511e-08	1.43717e-06	8.31274
IGKV6-21	2.4696	6.95389	6.35503	4.64461e-08	1.4417e-06	8.30865
RPS4XP20	-0.863367	0.233339	-6.35454	4.65309e-08	1.4428e-06	8.30687
AC246787.1	-1.45993	1.61042	-6.35301	4.6797e-08	1.44799e-06	8.30132
AC246787.3	-1.45993	1.61042	-6.35301	4.6797e-08	1.44799e-06	8.30132
RNF125	-1.2921	10.3007	-6.34756	4.77537e-08	1.47603e-06	8.28162
DMKN	-1.25494	3.88626	-6.34517	4.81788e-08	1.4876e-06	8.27299
H4C11	1.60067	4.98729	6.34368	4.84452e-08	1.49268e-06	8.26763
PLEKHM1	0.569255	11.7987	6.34259	4.86426e-08	1.49719e-06	8.26367
ZNF329	-0.931726	8.05202	-6.34019	4.90771e-08	1.50898e-06	8.25501
ERICH1	0.683267	10.1641	6.33685	4.96896e-08	1.52461e-06	8.24294
DKK3	-2.48909	3.61161	-6.33465	5.00959e-08	1.53547e-06	8.23501
EHF	-2.01548	1.31266	-6.33422	5.01768e-08	1.53634e-06	8.23344
EIF3K	-0.796509	12.0817	-6.33155	5.06774e-08	1.55005e-06	8.22378
DCK	-0.913442	11.0022	-6.33044	5.0885e-08	1.55478e-06	8.2198
ZNF649	-0.962283	7.6178	-6.32756	5.1432e-08	1.56985e-06	8.20939
RPL10P3	-1.66679	1.02195	-6.32627	5.16788e-08	1.57575e-06	8.20473
THUMPD1	-0.879573	11.0631	-6.32293	5.23234e-08	1.59374e-06	8.19266
SNED1	-1.43528	6.39717	-6.32083	5.27326e-08	1.60288e-06	8.18508
PRKRA	-0.523362	9.11353	-6.32024	5.28489e-08	1.60475e-06	8.18294
SAMD15	1.84096	4.45954	6.31811	5.32674e-08	1.61442e-06	8.17526
MGAM2	2.80971	9.2455	6.31806	5.32779e-08	1.61442e-06	8.17507
H2AC19	2.57541	7.83593	6.31631	5.36243e-08	1.62324e-06	8.16876
CERK	-0.704891	11.7952	-6.31482	5.39213e-08	1.63055e-06	8.16338
LHFPL2	1.39572	10.674	6.31366	5.41553e-08	1.63594e-06	8.15917
FXYD7	-1.5287	4.65758	-6.31211	5.44676e-08	1.64368e-06	8.15357
AC007325.1	3.04486	6.73538	6.31181	5.45271e-08	1.64378e-06	8.15251
ZNF671	-0.557808	9.10562	-6.31027	5.48391e-08	1.65149e-06	8.14695
INSC	2.07634	5.60655	6.30994	5.49077e-08	1.65185e-06	8.14574
NSG1	-2.12966	7.63437	-6.30961	5.49745e-08	1.65217e-06	8.14455
MT-CO3	-1.15164	15.9769	-6.3071	5.5488e-08	1.66515e-06	8.1355
TNK1	-1.57613	5.35822	-6.30695	5.55202e-08	1.66515e-06	8.13494
RGS16	1.63405	5.99322	6.30592	5.5733e-08	1.66983e-06	8.13122
SLCO2B1	1.71907	4.54756	6.30548	5.58231e-08	1.67081e-06	8.12965
SCML1	-1.49568	7.0804	-6.30121	5.67141e-08	1.69402e-06	8.11423
ZIK1	-1.26434	7.41945	-6.30058	5.68473e-08	1.69627e-06	8.11195
FAM72D	1.44973	6.19319	6.30012	5.69436e-08	1.69742e-06	8.1103
SIGLEC11	2.28533	6.45907	6.29897	5.71882e-08	1.70298e-06	8.10613
IGLV1-44	3.28646	10.9174	6.29757	5.74844e-08	1.70968e-06	8.1011
TRAF1	-1.13273	9.95277	-6.29736	5.75301e-08	1.70968e-06	8.10033
GPR173	-1.29547	2.93452	-6.29451	5.81427e-08	1.72614e-06	8.09002
ZNF853	-1.52927	6.62908	-6.29412	5.82266e-08	1.72688e-06	8.08862
ZNF823	-1.03383	6.40704	-6.2888	5.93851e-08	1.75946e-06	8.06944
SCOC	-0.843624	9.17695	-6.28741	5.9692e-08	1.76676e-06	8.06443
FBL	-1.10002	11.2985	-6.28546	6.0125e-08	1.77778e-06	8.05739
LMAN1L	1.87619	3.0444	6.28422	6.04039e-08	1.78423e-06	8.05289
MAST2	0.692152	9.05064	6.27667	6.21189e-08	1.83304e-06	8.02564
H2AC15	1.75998	2.95923	6.27462	6.25918e-08	1.84328e-06	8.01826
RPL21P6	-1.02482	0.413934	-6.27398	6.27413e-08	1.84583e-06	8.01594
MYL6B	0.986902	7.75135	6.27314	6.29372e-08	1.8487e-06	8.0129
PHF10	-0.882456	10.6558	-6.27296	6.29789e-08	1.8487e-06	8.01226
IGHV2-26	3.41526	7.8866	6.27275	6.30281e-08	1.8487e-06	8.0115
IMMP1L	-0.762451	6.99294	-6.27231	6.31301e-08	1.84984e-06	8.00993
MT-ND3	-1.23977	13.5715	-6.27162	6.32923e-08	1.85111e-06	8.00743
ACADSB	-0.781377	9.41095	-6.27132	6.3363e-08	1.85111e-06	8.00634
CYP2U1	-1.51246	7.51072	-6.2679	6.41714e-08	1.87286e-06	7.99401
MIXL1	2.06715	5.94886	6.26748	6.42705e-08	1.87389e-06	7.9925
DBP	-0.909106	8.3912	-6.26212	6.55613e-08	1.90962e-06	7.97315
UBE2Q2	-0.97116	10.2135	-6.26172	6.56586e-08	1.91055e-06	7.97171
TMEM35B	-0.753742	8.8852	-6.26128	6.57642e-08	1.91173e-06	7.97015
IGLV3-27	3.97466	7.73513	6.26013	6.60451e-08	1.91799e-06	7.966
CRBN	-0.55606	11.0128	-6.25649	6.69423e-08	1.94212e-06	7.95287
COL7A1	1.9007	6.69057	6.25046	6.84562e-08	1.98407e-06	7.93111
GLDC	3.08319	8.23185	6.25019	6.85238e-08	1.98407e-06	7.93015
CPE	3.30507	3.76403	6.24925	6.87631e-08	1.98904e-06	7.92675
AC022916.4	-2.57969	1.91558	-6.24855	6.89423e-08	1.99226e-06	7.92422
CTSF	-1.5132	7.07525	-6.24731	6.926e-08	1.99946e-06	7.91975
C1orf109	-0.646639	8.29981	-6.24528	6.97828e-08	2.01257e-06	7.91243
GRIPAP1	0.665454	11.6958	6.24463	6.99523e-08	2.01548e-06	7.91007
SLC66A3	-0.946728	9.90306	-6.24381	7.01654e-08	2.01753e-06	7.90711
ABCB9	1.4795	7.18794	6.24356	7.023e-08	2.01753e-06	7.90621
NPC1	-0.665739	10.5882	-6.24219	7.05878e-08	2.02582e-06	7.90127
NAP1L1	-1.0664	13.7009	-6.24117	7.08527e-08	2.03143e-06	7.89762
MS4A4A	2.01967	9.07209	6.24074	7.09663e-08	2.0327e-06	7.89606
IGHV4-34	3.64721	11.0157	6.23994	7.11766e-08	2.03673e-06	7.89319
AL133517.1	1.93267	5.46943	6.23524	7.24284e-08	2.07054e-06	7.87622
CD48	-0.986196	13.0547	-6.23488	7.25233e-08	2.07123e-06	7.87495
SGPP1	-1.08004	9.54915	-6.23447	7.26358e-08	2.07242e-06	7.87344
KNTC1	0.702524	9.77976	6.23001	7.38445e-08	2.10323e-06	7.85738
RASA4	-1.2404	9.96867	-6.22969	7.39336e-08	2.10323e-06	7.85621
TCEAL1	-0.955517	6.82707	-6.22943	7.40028e-08	2.10323e-06	7.8553
NELL2	-2.76337	9.56071	-6.2284	7.42861e-08	2.10924e-06	7.85158
RPL14P1	-1.19321	4.63314	-6.22808	7.43738e-08	2.10968e-06	7.85043
ZBED5	-0.509154	10.7605	-6.22585	7.49919e-08	2.12516e-06	7.84238
TFPI	0.928015	9.31812	6.22297	7.57967e-08	2.14589e-06	7.83199
NMRAL2P	2.72369	5.05548	6.22014	7.65942e-08	2.16433e-06	7.82181
TMEM8B	-1.14559	6.49336	-6.22014	7.65957e-08	2.16433e-06	7.82179
TENT5B	-2.11411	1.04922	-6.2181	7.71758e-08	2.17635e-06	7.81445
C14orf28	-0.920667	7.24952	-6.218	7.72039e-08	2.17635e-06	7.81409
IGF2BP3	1.30993	7.87183	6.21786	7.72441e-08	2.17635e-06	7.81359
CCNF	1.29363	8.50142	6.21579	7.78382e-08	2.19099e-06	7.80613
DDN	2.44032	3.17055	6.21482	7.81196e-08	2.1968e-06	7.80262
AC103810.9	1.16382	4.12997	6.21444	7.82287e-08	2.19736e-06	7.80126
LUC7L2	-0.583038	11.3511	-6.21423	7.82896e-08	2.19736e-06	7.80051
FAM122B	-0.50625	10.7253	-6.21062	7.93447e-08	2.22484e-06	7.78748
IL34	-2.19051	1.21263	-6.20927	7.97408e-08	2.23381e-06	7.78264
SATB1	-0.980804	11.9528	-6.20746	8.0278e-08	2.24671e-06	7.7761
ZNF337	-0.925957	9.11716	-6.20614	8.06715e-08	2.25557e-06	7.77135
IGHV3-21	3.77218	10.7998	6.20364	8.14207e-08	2.27435e-06	7.76235
FAM111B	1.41804	8.20031	6.2018	8.19762e-08	2.28768e-06	7.75574
FGFR2	-2.57418	4.07389	-6.20151	8.20647e-08	2.28797e-06	7.75469
SH3YL1	-1.35554	9.0003	-6.20013	8.24848e-08	2.2975e-06	7.74972
HAUS1P1	2.64156	5.16256	6.19955	8.26638e-08	2.3003e-06	7.74761
RPL4P1	-2.30441	3.60124	-6.19898	8.28376e-08	2.30295e-06	7.74557
LUC7L	-0.677809	9.89943	-6.19045	8.54962e-08	2.37461e-06	7.71484
GFPT2	-2.42718	2.75413	-6.18869	8.60549e-08	2.38786e-06	7.7085
FAM92B	2.19349	2.25483	6.18834	8.61651e-08	2.38866e-06	7.70725
ZNF461	-1.13542	6.6828	-6.18744	8.64548e-08	2.39442e-06	7.70399
FAM24B	-1.03286	5.45179	-6.18711	8.65597e-08	2.39506e-06	7.70281
AC010186.2	-0.881724	8.93851	-6.18654	8.67414e-08	2.39783e-06	7.70077
PLK4	1.19766	7.88065	6.18513	8.71946e-08	2.40808e-06	7.6957
TRIM4	-0.659185	10.6591	-6.18313	8.78453e-08	2.42149e-06	7.68847
TRBC2	-2.01843	12.4846	-6.18269	8.79853e-08	2.42307e-06	7.68692
AL078604.1	-1.61478	1.20168	-6.18213	8.81692e-08	2.42585e-06	7.68489
GP1BA	1.82373	9.40293	6.18069	8.86412e-08	2.43655e-06	7.67969
ENPP3	-2.01999	4.32667	-6.18017	8.88121e-08	2.43896e-06	7.67782
ASS1P1	2.03841	4.73464	6.17415	9.08132e-08	2.48925e-06	7.65614
C12orf29	-0.838772	8.33389	-6.17275	9.12822e-08	2.49977e-06	7.65113
NFIL3	1.26377	11.8547	6.17125	9.17925e-08	2.51026e-06	7.64571
PYURF	-0.564385	10.1409	-6.17112	9.18365e-08	2.51026e-06	7.64524
DUSP2	-1.49384	7.66752	-6.17008	9.2191e-08	2.51619e-06	7.6415
ZC3H12B	-1.15263	5.63618	-6.16965	9.23364e-08	2.51667e-06	7.63996
CASD1	-1.05056	9.31922	-6.16933	9.24479e-08	2.51667e-06	7.63879
FAM124A	1.24839	4.24011	6.16917	9.25006e-08	2.51667e-06	7.63823
LAMA2	-1.82457	4.63803	-6.16785	9.29526e-08	2.52662e-06	7.63349
ZNF2	-0.564803	8.07105	-6.16689	9.32833e-08	2.53326e-06	7.63004
C3AR1	1.93578	12.0957	6.16489	9.39784e-08	2.54977e-06	7.62282
NSA2	-0.911141	11.3204	-6.16299	9.46422e-08	2.56541e-06	7.61597
NKIRAS2	0.520356	10.6041	6.1615	9.51627e-08	2.57713e-06	7.61063
TRMT61B	-0.798345	7.59898	-6.16049	9.55198e-08	2.58441e-06	7.60699
PACS1	-0.538758	12.8131	-6.15843	9.62519e-08	2.59942e-06	7.59956
SEPTIN1	-1.22022	11.054	-6.15804	9.63902e-08	2.60076e-06	7.59817
IGHEP2	1.49056	2.43893	6.1553	9.73721e-08	2.62484e-06	7.58831
ELOVL3	1.85627	5.91093	6.15505	9.74621e-08	2.62485e-06	7.58741
ANO9	-1.37136	8.50015	-6.1502	9.92244e-08	2.66741e-06	7.56998
SKAP1	-1.62278	10.1773	-6.147	1.00407e-07	2.69425e-06	7.55846
GPRIN1	1.41285	6.26285	6.14611	1.0074e-07	2.70071e-06	7.55524
ZNF547	-1.10887	5.87448	-6.14325	1.01809e-07	2.72689e-06	7.54497
KLRK1	-1.88633	10.98	-6.13996	1.03056e-07	2.75777e-06	7.53312
ADAM17	0.832551	11.6908	6.13931	1.03302e-07	2.76182e-06	7.53081
SRGAP3	-0.892863	6.05649	-6.13812	1.03761e-07	2.77157e-06	7.5265
PCGF5	-1.00188	12.2464	-6.13777	1.03894e-07	2.7726e-06	7.52525
BX470111.1	-0.942785	6.43613	-6.13746	1.04013e-07	2.77325e-06	7.52413
RPL23AP43	-1.04106	0.363995	-6.13709	1.04157e-07	2.77456e-06	7.52279
H2BC21	1.59365	11.7046	6.13671	1.043e-07	2.77585e-06	7.52145
HAUS3	-0.64222	9.40409	-6.13512	1.04917e-07	2.78974e-06	7.51572
SEPTIN7P2	-0.709509	7.98312	-6.13465	1.05098e-07	2.7903e-06	7.51404
RPLP1	-1.0592	13.8962	-6.13416	1.0529e-07	2.7903e-06	7.51226
ZNF266	-0.962278	10.718	-6.13383	1.05419e-07	2.79042e-06	7.51108
SMAD4	-0.505795	11.3386	-6.13326	1.05641e-07	2.79164e-06	7.50903
ZBTB46	-1.32011	6.52722	-6.13322	1.05656e-07	2.79164e-06	7.50889
EPHX2	-1.32519	8.12639	-6.12784	1.07781e-07	2.84521e-06	7.48953
WNT7A	-2.14128	4.6743	-6.12697	1.08126e-07	2.85176e-06	7.48642
RPS27AP16	-1.56869	2.17118	-6.12515	1.08855e-07	2.8684e-06	7.47989
ZNF438	1.28747	10.4384	6.12351	1.09516e-07	2.88324e-06	7.47399
PADI4	1.58124	12.8157	6.12271	1.09843e-07	2.88451e-06	7.4711
GPR141	1.60086	9.39263	6.1225	1.09929e-07	2.88451e-06	7.47034
ZNF74	-0.93386	7.4708	-6.12191	1.10167e-07	2.88741e-06	7.46823
PTTG1	1.52233	8.75112	6.12015	1.10888e-07	2.90111e-06	7.46189
ANKRD33B	1.23895	9.38767	6.11908	1.11327e-07	2.90741e-06	7.45804
SMIM19	-0.651018	8.36893	-6.1185	1.11565e-07	2.90988e-06	7.45597
SAPCD2	1.79816	7.37657	6.11787	1.11825e-07	2.90988e-06	7.4537
OPTN	-1.22512	11.6334	-6.1178	1.11854e-07	2.90988e-06	7.45345
NR2C1	-0.699006	8.66442	-6.1176	1.11938e-07	2.90988e-06	7.45272
TG	1.7368	6.31888	6.11751	1.11975e-07	2.90988e-06	7.4524
GINS4	1.07596	7.51599	6.1174	1.12018e-07	2.90988e-06	7.45203
PLXNB3	2.88237	6.28263	6.11592	1.12635e-07	2.92015e-06	7.44668
NFATC3	-0.680568	12.3687	-6.11573	1.12712e-07	2.92015e-06	7.44602
LRRC1	-0.958598	5.96739	-6.11525	1.12914e-07	2.92281e-06	7.44428
AK5	-2.02656	6.88444	-6.11457	1.13197e-07	2.92754e-06	7.44184
UBL3	-0.595287	11.4055	-6.11264	1.14009e-07	2.94358e-06	7.43489
CETP	1.66807	6.50335	6.11262	1.14018e-07	2.94358e-06	7.43481
EAPP	-0.503675	10.537	-6.11223	1.14182e-07	2.94465e-06	7.43342
ZNF501	-1.19556	6.16686	-6.11204	1.14261e-07	2.94465e-06	7.43275
CA12	2.94095	4.9076	6.11157	1.14458e-07	2.94714e-06	7.43107
SMARCD3	1.35324	10.9624	6.11111	1.14652e-07	2.94955e-06	7.42942
RHOF	-0.742001	10.9735	-6.10764	1.16133e-07	2.98241e-06	7.41694
HSF2	-0.95732	8.64474	-6.10662	1.16574e-07	2.99111e-06	7.41326
SPAG16	-1.43505	5.97379	-6.10571	1.16967e-07	2.99858e-06	7.40998
MGAT4A	-0.979238	11.9643	-6.10506	1.17249e-07	3.00316e-06	7.40765
MRPL45	-0.656925	9.30934	-6.10231	1.18445e-07	3.03115e-06	7.39778
ZNF302	-1.03126	9.29003	-6.1014	1.18842e-07	3.03867e-06	7.39452
SPDYE3	-0.693526	7.60839	-6.10047	1.19252e-07	3.04648e-06	7.39117
ZBTB32	1.69575	7.46201	6.10014	1.19396e-07	3.04751e-06	7.39
H2BC20P	1.30334	5.85582	6.09796	1.20364e-07	3.06954e-06	7.38215
GCNT1	0.923447	9.97287	6.09753	1.20555e-07	3.07173e-06	7.3806
FREM3	-1.37481	0.634589	-6.09181	1.23128e-07	3.13458e-06	7.36007
RNASEH2B	-0.652472	10.0776	-6.08912	1.2436e-07	3.16247e-06	7.35039
TDRD9	1.9722	9.32923	6.08894	1.24439e-07	3.16247e-06	7.34976
ABHD15	-0.819139	9.20375	-6.08861	1.24594e-07	3.16366e-06	7.34855
SELP	1.87234	9.68875	6.08744	1.25131e-07	3.17454e-06	7.34437
AC026403.1	-1.15893	11.1675	-6.08384	1.2681e-07	3.21435e-06	7.33141
GRAP	-1.12293	9.55065	-6.08298	1.27209e-07	3.21989e-06	7.32836
PTPDC1	-0.992958	5.91974	-6.0829	1.27248e-07	3.21989e-06	7.32806
FXYD5	-0.742931	12.8876	-6.08103	1.28131e-07	3.23942e-06	7.32134
SRPX	-1.87577	1.01433	-6.08008	1.28582e-07	3.24801e-06	7.31792
ARL6	-1.28123	5.92931	-6.07931	1.28945e-07	3.25205e-06	7.31518
TRIM60P18	-1.49395	5.24144	-6.07928	1.28963e-07	3.25205e-06	7.31504
CLCF1	-1.0688	6.50009	-6.07808	1.29536e-07	3.26369e-06	7.31073
VEGFB	-0.777736	8.59022	-6.0778	1.29668e-07	3.2642e-06	7.30974
RBM39	-0.52483	13.2768	-6.07735	1.29884e-07	3.26683e-06	7.30813
IL26	-1.86992	1.81612	-6.07674	1.30176e-07	3.27137e-06	7.30594
EIF4A2	-1.11866	13.1997	-6.07421	1.31398e-07	3.29924e-06	7.29686
EFNA3	-0.870826	5.49173	-6.07278	1.32093e-07	3.31385e-06	7.29173
PHKA1	1.9465	5.03492	6.07156	1.32689e-07	3.32597e-06	7.28735
ASIC4	1.70886	3.12223	6.0711	1.32915e-07	3.32877e-06	7.2857
KAT14	-0.73896	9.18439	-6.06966	1.33624e-07	3.34369e-06	7.28052
FMNL3	-1.10337	9.87938	-6.06714	1.34876e-07	3.36926e-06	7.27145
QSOX1	1.13002	11.9879	6.0661	1.35393e-07	3.37862e-06	7.26773
H2BS1	1.63978	7.66335	6.06592	1.35482e-07	3.37862e-06	7.2671
CIRBP	-0.841261	12.4773	-6.06553	1.35676e-07	3.3806e-06	7.2657
RPS4X	-1.37677	14.3264	-6.06476	1.36064e-07	3.38738e-06	7.26293
DDAH2	1.42044	10.3383	6.05926	1.38853e-07	3.45311e-06	7.2432
IGKV1-5	2.70885	11.8805	6.05909	1.3894e-07	3.45311e-06	7.24259
GALT	-0.549807	9.41222	-6.05722	1.39903e-07	3.46968e-06	7.23587
KIT	-1.80159	6.19068	-6.05711	1.39962e-07	3.46968e-06	7.23547
HDAC4	0.811775	11.6154	6.05651	1.40273e-07	3.47445e-06	7.23331
LANCL1	-0.934364	9.8364	-6.0554	1.40845e-07	3.48567e-06	7.22935
PEX12	-0.656275	7.79345	-6.05486	1.41129e-07	3.48728e-06	7.22739
LRPAP1	0.845659	11.5714	6.05482	1.41148e-07	3.48728e-06	7.22726
IGKV3-20	2.67832	12.7052	6.05416	1.41493e-07	3.49287e-06	7.22489
ZNF256	-1.17103	6.9645	-6.05392	1.41617e-07	3.49297e-06	7.22404
SNTA1	-1.06569	6.26773	-6.05358	1.41798e-07	3.49355e-06	7.2228
GIMAP2	-1.02084	11.3412	-6.05342	1.41879e-07	3.49355e-06	7.22224
EFHD1	-1.45274	4.16634	-6.05256	1.42333e-07	3.49886e-06	7.21913
CREBZF	-0.773283	10.6478	-6.05124	1.43025e-07	3.50999e-06	7.21442
NIPSNAP3B	-1.10792	4.77406	-6.05013	1.43612e-07	3.52143e-06	7.21044
TMEM38A	1.2898	7.9726	6.04862	1.44419e-07	3.53826e-06	7.20499
CRIP2	-2.24163	5.79447	-6.04589	1.45879e-07	3.57105e-06	7.19521
RPL41	-0.940042	14.6263	-6.04475	1.46495e-07	3.58314e-06	7.19111
ITGA8	2.29839	4.03903	6.04353	1.47156e-07	3.59332e-06	7.18673
GALNT2	0.782958	11.5325	6.04291	1.47491e-07	3.59637e-06	7.18452
CTNND2	-1.76685	1.17378	-6.04284	1.47527e-07	3.59637e-06	7.18429
ATP5F1AP8	-1.20627	0.301858	-6.04067	1.48717e-07	3.62084e-06	7.17647
NT5E	-2.01696	7.61018	-6.04056	1.48778e-07	3.62084e-06	7.17608
RAD51AP1	1.19814	7.02413	6.03835	1.49995e-07	3.64534e-06	7.16816
PID1	-3.4688	7.18514	-6.03783	1.50283e-07	3.64832e-06	7.16629
AC079250.1	-1.76458	3.07608	-6.03761	1.50405e-07	3.64832e-06	7.1655
EIF4B	-1.04676	14.2152	-6.03685	1.50825e-07	3.65401e-06	7.16279
PHTF1	1.15266	10.0978	6.03632	1.51124e-07	3.65667e-06	7.16087
AP001324.1	-1.77297	1.38629	-6.03499	1.51864e-07	3.67156e-06	7.15612
CYSLTR2	-2.14643	7.6125	-6.03442	1.52186e-07	3.6763e-06	7.15406
SLC16A3	1.1531	12.7266	6.03171	1.53712e-07	3.71012e-06	7.14436
ZNF319	0.77678	10.4617	6.03062	1.54335e-07	3.72208e-06	7.14043
LRRK1	0.730482	11.6242	6.03022	1.54562e-07	3.7231e-06	7.139
ZNF485	-1.21241	6.40192	-6.0301	1.54631e-07	3.7231e-06	7.13856
DCUN1D4	-0.735118	8.77486	-6.02655	1.56669e-07	3.76905e-06	7.12584
ZNF248	-1.0704	7.9614	-6.02566	1.57184e-07	3.77836e-06	7.12265
KRT5	-3.55934	2.69094	-6.02519	1.57458e-07	3.78182e-06	7.12096
C12orf57	-1.17287	9.20916	-6.02477	1.57702e-07	3.78458e-06	7.11945
LILRB4	1.02803	11.07	6.02414	1.58065e-07	3.79019e-06	7.11722
TRBJ1-1	-1.86408	3.90567	-6.02203	1.59303e-07	3.81676e-06	7.10963
IMMP2L	-1.2813	5.49314	-6.01876	1.61232e-07	3.85983e-06	7.09793
MGST1	1.1348	9.90522	6.01826	1.61533e-07	3.86386e-06	7.09612
AC116353.6	1.39379	5.34645	6.01749	1.6199e-07	3.87163e-06	7.09337
NEIL3	1.84757	5.60332	6.01581	1.62995e-07	3.89136e-06	7.08736
CPEB4	0.972763	12.1256	6.01567	1.63081e-07	3.89136e-06	7.08685
PDIA5	1.25942	8.90946	6.01482	1.63596e-07	3.90047e-06	7.08378
ZNF287	-1.38451	6.37164	-6.01183	1.65408e-07	3.94048e-06	7.07307
LRFN1	1.37252	9.45366	6.00964	1.66746e-07	3.96911e-06	7.06525
SOAT2	-1.96806	2.69158	-6.00892	1.6719e-07	3.97647e-06	7.06266
CCR6	-1.65991	8.99482	-6.00838	1.67524e-07	3.98118e-06	7.06072
THEM4	-0.963844	9.05788	-6.00538	1.69388e-07	4.0222e-06	7.04997
RPS3AP36	-0.979706	0.314686	-6.00345	1.70598e-07	4.04767e-06	7.04304
IGLV3-19	3.91818	11.5685	6.00263	1.71116e-07	4.05667e-06	7.0401
AC015977.1	-0.525853	0.0973802	-6.0008	1.72269e-07	4.07459e-06	7.03357
TTC39C	-1.14756	10.12	-6.00078	1.72284e-07	4.07459e-06	7.03349
CNIH3	-1.09884	5.51802	-6.00067	1.72356e-07	4.07459e-06	7.03308
PIR	2.33557	4.1267	6.00055	1.72428e-07	4.07459e-06	7.03267
S1PR1	-1.31489	11.8646	-5.99994	1.7282e-07	4.08055e-06	7.03047
ACVR1B	0.987887	10.7242	5.9996	1.73034e-07	4.08232e-06	7.02926
APOBEC3A	1.26435	13.1667	5.99797	1.74078e-07	4.09873e-06	7.02342
HBA1	-3.64469	10.2015	-5.99769	1.74257e-07	4.09873e-06	7.02242
SYBU	-1.4687	3.44353	-5.99764	1.74289e-07	4.09873e-06	7.02224
CD1E	-2.99039	3.47802	-5.99498	1.76007e-07	4.1358e-06	7.01271
TNFRSF25	-1.64075	8.75603	-5.99441	1.76375e-07	4.13983e-06	7.01067
IL11RA	-1.23151	8.8385	-5.99355	1.76939e-07	4.14772e-06	7.00757
ABLIM2	-1.3945	4.03445	-5.99276	1.77453e-07	4.15645e-06	7.00475
IGF1	2.48596	5.92991	5.99152	1.78268e-07	4.16889e-06	7.0003
INCENP	0.86632	9.10277	5.99097	1.78627e-07	4.17396e-06	6.99834
IGHV3-11	3.53409	9.48515	5.99027	1.7909e-07	4.18143e-06	6.99583
RPL4P5	-1.70027	3.25501	-5.98635	1.81693e-07	4.23882e-06	6.9818
ZNF549	-0.957234	8.49487	-5.98523	1.82446e-07	4.25094e-06	6.97778
PBXIP1	-0.700075	12.8836	-5.98515	1.82502e-07	4.25094e-06	6.97749
EGFL8	-1.3786	5.2003	-5.98203	1.84608e-07	4.29316e-06	6.96634
FCGR1CP	2.18461	8.26033	5.98073	1.85496e-07	4.31038e-06	6.96167
RHBDF2	0.874826	11.8044	5.97913	1.86589e-07	4.33236e-06	6.95596
FAM151B	1.21392	7.07267	5.97885	1.86784e-07	4.33344e-06	6.95495
CDC42EP3	0.837517	13.4617	5.97756	1.87673e-07	4.35062e-06	6.95033
SETD6	-0.779683	7.47931	-5.97658	1.88353e-07	4.3595e-06	6.94681
CROT	-1.0173	7.89769	-5.97336	1.90598e-07	4.40797e-06	6.9353
MT-ND1	-1.14346	16.065	-5.97293	1.90902e-07	4.41153e-06	6.93375
BCAS4	-0.965898	8.20009	-5.97163	1.9182e-07	4.42622e-06	6.92909
PAQR4	1.00688	8.43216	5.96851	1.94036e-07	4.47337e-06	6.91793
DCTD	-0.582836	10.1733	-5.96766	1.94648e-07	4.48394e-06	6.91487
RHOH	-1.01134	10.5147	-5.9671	1.95045e-07	4.48634e-06	6.91289
PKMP3	-1.51476	3.5807	-5.96708	1.95058e-07	4.48634e-06	6.91282
SLC25A36	-0.802537	10.0765	-5.96591	1.95901e-07	4.5022e-06	6.90863
ECRG4	-2.46796	2.48708	-5.96513	1.96466e-07	4.51163e-06	6.90583
IGLL5	2.53785	9.37561	5.96115	1.99364e-07	4.57427e-06	6.8916
HPDL	2.17159	4.53266	5.96096	1.99506e-07	4.57427e-06	6.89091
AP1S2	-1.23287	12.0777	-5.96049	1.9985e-07	4.57857e-06	6.88924
IL2	-1.3103	0.425244	-5.96024	2.0004e-07	4.57935e-06	6.88831
CBLB	-1.023	8.78672	-5.95884	2.01074e-07	4.59942e-06	6.88331
CENPV	-0.852833	7.10952	-5.95804	2.01661e-07	4.60927e-06	6.88047
DAPK3	0.703813	9.30561	5.95355	2.05028e-07	4.68256e-06	6.86438
CCDC115	-0.5394	10.2003	-5.95303	2.05419e-07	4.68784e-06	6.86253
PRKACB	-1.45121	11.6832	-5.94409	2.12289e-07	4.83707e-06	6.83056
AL671986.1	1.78643	2.6614	5.94118	2.1458e-07	4.88549e-06	6.82013
CCDC88B	0.874951	12.6798	5.94021	2.15344e-07	4.89527e-06	6.81668
CLIP1	0.528606	12.0297	5.9383	2.1686e-07	4.92592e-06	6.80986
TATDN1	-0.573358	8.28277	-5.93602	2.18691e-07	4.96366e-06	6.80169
CHAF1B	0.778787	7.89339	5.93558	2.19045e-07	4.96435e-06	6.80012
TOR4A	0.980718	10.3061	5.93556	2.1906e-07	4.96435e-06	6.80005
HYAL1	1.10759	4.48678	5.93525	2.19307e-07	4.96611e-06	6.79896
HSPB9	1.33908	4.24473	5.93294	2.21182e-07	5.0047e-06	6.79069
RACGAP1	0.790525	9.31817	5.93145	2.22402e-07	5.02805e-06	6.78534
EEF1A1P29	-1.83235	1.45486	-5.93126	2.22558e-07	5.02805e-06	6.78466
TRAV1-1	-1.82812	3.82626	-5.93048	2.23191e-07	5.03848e-06	6.7819
VSIG1	-1.98351	7.34415	-5.93013	2.23485e-07	5.04122e-06	6.78063
CLEC4F	-3.82218	2.64983	-5.92914	2.24297e-07	5.05564e-06	6.7771
BATF	0.966306	9.51214	5.92841	2.24902e-07	5.0654e-06	6.77448
SPATS2	1.29541	8.89692	5.92805	2.25198e-07	5.06816e-06	6.77321
EIF4A2P1	-1.81571	2.53488	-5.9275	2.25657e-07	5.07461e-06	6.77122
UST	-1.28893	7.02759	-5.92655	2.26444e-07	5.08694e-06	6.76784
SUMO2	-0.516161	12.4262	-5.92642	2.26553e-07	5.08694e-06	6.76738
SMKR1	-1.64541	4.14851	-5.9245	2.28159e-07	5.11515e-06	6.76051
PEA15	-1.00599	10.8123	-5.92392	2.28647e-07	5.11916e-06	6.75844
MYDGF	1.33532	10.5858	5.92366	2.28862e-07	5.11916e-06	6.75753
TBC1D4	-1.82638	9.54534	-5.92097	2.31141e-07	5.16226e-06	6.7479
H2BC4	1.62296	9.55151	5.9202	2.31799e-07	5.17302e-06	6.74513
RPL7P32	-1.55543	1.95011	-5.91921	2.32643e-07	5.1879e-06	6.7416
KLRG1	-2.00454	9.03044	-5.91757	2.34052e-07	5.21535e-06	6.73574
BCL11B	-1.92909	10.9704	-5.91729	2.34289e-07	5.21668e-06	6.73475
IGKV1-9	2.49326	9.34088	5.91256	2.38402e-07	5.30421e-06	6.71785
GTPBP1	0.668157	11.9962	5.91215	2.38764e-07	5.30824e-06	6.71637
TESPA1	-1.60854	10.5822	-5.91194	2.38945e-07	5.30824e-06	6.71564
TSHZ1	-0.777516	9.78043	-5.90999	2.40665e-07	5.34241e-06	6.70867
PLEKHG4	-0.982673	7.14057	-5.90958	2.41028e-07	5.3464e-06	6.7072
RBFOX2	-1.22486	4.0572	-5.90891	2.41623e-07	5.35554e-06	6.70481
ALDH1A2	1.68627	6.22171	5.90487	2.4524e-07	5.43162e-06	6.69037
ACKR3	-1.42897	6.23095	-5.90429	2.45763e-07	5.43839e-06	6.6883
GALNT11	-0.503299	9.76678	-5.90412	2.45917e-07	5.43839e-06	6.68769
ZMAT3	-0.725594	10.093	-5.90173	2.48087e-07	5.47505e-06	6.67916
AC139494.1	1.89941	10.8443	5.90158	2.48223e-07	5.47505e-06	6.67863
C7orf31	-0.638397	8.3094	-5.90147	2.48322e-07	5.47505e-06	6.67824
COX7C	-0.688619	11.4551	-5.89652	2.52888e-07	5.57151e-06	6.66054
HNRNPA0	-0.542588	11.7146	-5.89389	2.55338e-07	5.62127e-06	6.65117
PMP22	-2.97166	3.45787	-5.89217	2.5696e-07	5.65273e-06	6.64502
TPPP3	-2.89512	5.90965	-5.89137	2.5772e-07	5.6652e-06	6.64215
RPA1	-0.690686	11.535	-5.89112	2.57956e-07	5.66613e-06	6.64127
METAP1	-0.51676	10.2441	-5.88961	2.59391e-07	5.6934e-06	6.63588
IGHA1	2.58652	16.0184	5.88898	2.59988e-07	5.70222e-06	6.63364
SSH1	0.757765	11.9261	5.88667	2.62205e-07	5.74655e-06	6.62539
AC084871.1	2.09976	2.11872	5.88636	2.62502e-07	5.74876e-06	6.6243
UPP1	1.49387	11.4614	5.88566	2.63178e-07	5.75925e-06	6.6218
RNF24	0.967588	13.6635	5.88405	2.64744e-07	5.7892e-06	6.61603
MAP2K5	-0.510545	8.91948	-5.88305	2.6572e-07	5.80622e-06	6.61246
GSTK1	-0.563914	12.5891	-5.88044	2.68274e-07	5.85329e-06	6.60317
DENND11	-1.38572	10.5921	-5.87983	2.68882e-07	5.86218e-06	6.60097
CYP2R1	-0.544001	8.32547	-5.87926	2.69443e-07	5.86764e-06	6.59894
RPS27AP11	-1.55579	1.29234	-5.87897	2.69733e-07	5.86764e-06	6.5979
DUS4L	-0.675504	6.78842	-5.87871	2.69991e-07	5.86889e-06	6.59697
INPP5E	-0.611495	8.01446	-5.87634	2.7235e-07	5.91141e-06	6.58852
RBMX	-0.808154	12.3746	-5.87542	2.73276e-07	5.92711e-06	6.58522
OAZ3	-0.671674	4.93292	-5.8752	2.73497e-07	5.92751e-06	6.58444
CD3D	-1.78954	10.5708	-5.87479	2.73901e-07	5.9319e-06	6.583
UNC13B	1.56781	6.78584	5.87321	2.75499e-07	5.96208e-06	6.57736
ATP11A	0.842787	12.3435	5.86921	2.79582e-07	6.046e-06	6.56306
RALA	-0.581854	10.3109	-5.86644	2.82433e-07	6.10313e-06	6.55321
TM2D3	-0.507866	10.5236	-5.86478	2.84168e-07	6.1361e-06	6.54726
ZNF566	-1.01292	7.75933	-5.86294	2.86086e-07	6.17297e-06	6.54073
IGHG3	3.5465	12.372	5.8627	2.86344e-07	6.17398e-06	6.53985
ANKS6	-1.12254	7.3198	-5.86202	2.87059e-07	6.18485e-06	6.53743
SAMD10	-1.05668	7.06731	-5.85592	2.9356e-07	6.32028e-06	6.51568
TIMM9	-0.646698	8.58871	-5.85501	2.94546e-07	6.33685e-06	6.51242
IGLJ3	2.52533	8.06322	5.85445	2.95145e-07	6.34508e-06	6.51045
WDR75	-0.61188	10.0297	-5.85239	2.97387e-07	6.3886e-06	6.5031
RPL21P11	-1.95695	2.02273	-5.85169	2.98161e-07	6.40052e-06	6.50058
EPHA4	-1.62493	7.89962	-5.8506	2.99347e-07	6.42128e-06	6.49672
TRBV14	-1.96635	4.84374	-5.84987	3.00154e-07	6.43388e-06	6.49411
ZCCHC18	-1.26399	5.53469	-5.84919	3.009e-07	6.44515e-06	6.4917
CNGA4	2.04312	4.36538	5.84759	3.02673e-07	6.47254e-06	6.48599
AC011979.1	-2.5582	2.40051	-5.84744	3.02841e-07	6.47254e-06	6.48545
ATAD1	-0.558284	10.3814	-5.8462	3.04221e-07	6.49257e-06	6.48104
EXOSC6	-0.633705	9.50329	-5.8453	3.05229e-07	6.50933e-06	6.47782
RPL9	-1.8603	12.2653	-5.84501	3.05555e-07	6.51155e-06	6.47679
PRKCH	-1.40433	11.9194	-5.84376	3.06959e-07	6.5367e-06	6.47234
ZNF563	-0.845913	6.33566	-5.84335	3.0742e-07	6.54177e-06	6.47088
SBDSP1	-0.748131	7.52493	-5.84181	3.09167e-07	6.57418e-06	6.46537
FAM110C	-1.45354	4.13879	-5.84098	3.10106e-07	6.5847e-06	6.46243
IFNGR2	0.600866	13.2514	5.84098	3.10111e-07	6.5847e-06	6.46241
PCP4L1	1.78709	5.03016	5.83965	3.11632e-07	6.60853e-06	6.45766
EPM2A	-0.744344	7.34664	-5.8396	3.11685e-07	6.60853e-06	6.4575
SIPA1L2	1.65008	10.9969	5.83929	3.12041e-07	6.6113e-06	6.45639
EEF1A1P28	-1.64717	1.45957	-5.83812	3.13379e-07	6.63486e-06	6.45223
ZNF84	-0.882995	9.11657	-5.83667	3.15056e-07	6.66554e-06	6.44705
NDST1	0.822328	12.0763	5.83645	3.15309e-07	6.66608e-06	6.44627
FAU	-0.812042	12.481	-5.83593	3.1591e-07	6.67397e-06	6.44442
SPATC1	3.03917	5.64938	5.83486	3.17157e-07	6.69373e-06	6.4406
APBB1	-1.3578	9.18808	-5.83473	3.17302e-07	6.69373e-06	6.44015
GAS6	1.57098	9.01948	5.83367	3.18542e-07	6.71504e-06	6.43637
MYO10	1.52665	8.1963	5.8314	3.21206e-07	6.76633e-06	6.42828
IGHV4-61	2.80774	9.56975	5.83064	3.22106e-07	6.77579e-06	6.42556
FCMR	-1.52203	12.023	-5.83044	3.22344e-07	6.77579e-06	6.42484
GALNS	0.953075	10.4732	5.83043	3.22348e-07	6.77579e-06	6.42483
TBC1D19	-1.11518	5.5751	-5.82961	3.23321e-07	6.78833e-06	6.42191
DYNC2H1	-2.23317	4.79037	-5.82954	3.23408e-07	6.78833e-06	6.42164
ASF1A	-0.788438	9.67973	-5.82858	3.24552e-07	6.80745e-06	6.41821
ACAD11	-0.766897	8.40107	-5.82686	3.26597e-07	6.84057e-06	6.41211
RPL41P2	-2.69099	11.8778	-5.82631	3.27263e-07	6.84961e-06	6.41014
MBLAC2	-1.21112	7.52476	-5.82568	3.28021e-07	6.86059e-06	6.40789
ZNF527	-0.760802	7.31173	-5.82535	3.28417e-07	6.86395e-06	6.40672
LAMC1	1.92459	9.75502	5.82463	3.29286e-07	6.87722e-06	6.40415
ZNF416	-0.884518	7.27714	-5.82386	3.30219e-07	6.8918e-06	6.4014
MFNG	-0.693427	11.606	-5.82322	3.30987e-07	6.90291e-06	6.39915
ANKRD46	-0.888095	8.37483	-5.82145	3.33148e-07	6.93424e-06	6.39283
PPP4R1L	1.14309	10.0761	5.82134	3.33275e-07	6.93424e-06	6.39246
PRR11	1.16318	8.43734	5.82122	3.33425e-07	6.93424e-06	6.39202
SARDH	-1.74559	5.07685	-5.82121	3.33436e-07	6.93424e-06	6.39199
RPLP0	-1.1113	14.4284	-5.82035	3.34487e-07	6.95116e-06	6.38893
DERPC	-0.506529	11.1207	-5.81978	3.35188e-07	6.9608e-06	6.3869
TADA1	-0.635167	8.67166	-5.81879	3.36407e-07	6.98116e-06	6.38338
RPS3AP26	-2.41509	3.62414	-5.81683	3.38835e-07	7.02657e-06	6.37639
COX11	-0.511591	9.07848	-5.81643	3.39333e-07	7.03193e-06	6.37497
RPL5P24	-0.988185	0.329036	-5.81547	3.40535e-07	7.05183e-06	6.37154
CHPF2	0.519429	11.4858	5.81424	3.42077e-07	7.07877e-06	6.36715
EGF	1.99423	8.58706	5.81052	3.46771e-07	7.17084e-06	6.35392
RPS3AP20	-1.87125	2.81819	-5.80705	3.51214e-07	7.25761e-06	6.34155
AC124312.1	-1.73731	5.44684	-5.80606	3.52483e-07	7.27356e-06	6.33805
XIRP2	2.58119	4.77242	5.80463	3.5434e-07	7.30159e-06	6.33295
WDR89	-1.00208	9.14011	-5.80303	3.56422e-07	7.33934e-06	6.32726
RPL7P19	-2.29859	3.33794	-5.80188	3.57933e-07	7.36527e-06	6.32315
TRBV6-6	-1.90177	4.88851	-5.80078	3.59371e-07	7.38968e-06	6.31926
SERHL2	-0.781411	5.51471	-5.79979	3.60681e-07	7.41141e-06	6.31573
ADAM23	-1.85916	5.32174	-5.79773	3.6342e-07	7.46246e-06	6.30838
FO393411.1	-1.64148	1.16004	-5.79657	3.64971e-07	7.48905e-06	6.30425
OXNAD1	-1.18234	9.4058	-5.7919	3.71271e-07	7.613e-06	6.28763
MATK	-1.43101	8.95143	-5.79133	3.72036e-07	7.62336e-06	6.28563
HSD17B3	-1.98201	2.76471	-5.79058	3.7306e-07	7.63899e-06	6.28297
CLIC4	0.855112	11.2877	5.79032	3.73422e-07	7.64106e-06	6.28203
KIF5C	-1.5493	7.23007	-5.78971	3.74254e-07	7.65275e-06	6.27986
KLHDC1	-1.26367	6.12785	-5.78917	3.74994e-07	7.66253e-06	6.27795
ZNF548	-1.04371	8.84061	-5.78864	3.75721e-07	7.67204e-06	6.27607
KCNJ2	1.30214	12.04	5.78792	3.76725e-07	7.68184e-06	6.27347
FAM117B	-1.15898	10.1468	-5.78757	3.772e-07	7.68618e-06	6.27225
PRXL2B	-0.696938	8.69318	-5.78608	3.79262e-07	7.72281e-06	6.26696
EFCAB14	-0.683511	12.7024	-5.78584	3.79599e-07	7.72432e-06	6.2661
ATG9B	-1.68589	6.20305	-5.78548	3.80101e-07	7.72917e-06	6.26481
COL26A1	-3.19132	1.59012	-5.78441	3.816e-07	7.75426e-06	6.26099
BIVM	-0.830016	7.7588	-5.78419	3.81896e-07	7.7549e-06	6.26024
NLRC4	1.19016	11.5419	5.78192	3.85095e-07	7.81444e-06	6.25214
ERBB3	-0.837581	4.29039	-5.77733	3.91618e-07	7.9333e-06	6.23584
IFITM3	2.26567	14.4263	5.77615	3.93314e-07	7.9558e-06	6.23164
AC131392.2	2.62568	7.73929	5.77608	3.93419e-07	7.9558e-06	6.23138
QARS1	-0.736291	11.9877	-5.77482	3.95238e-07	7.98708e-06	6.2269
AC002075.2	-1.49591	1.58146	-5.77282	3.98151e-07	8.03876e-06	6.21978
ABCA1	1.68277	11.8268	5.77268	3.98344e-07	8.03876e-06	6.21931
RPL36	-0.969957	12.406	-5.77175	3.99707e-07	8.04575e-06	6.21599
TSEN54	-0.924892	9.04761	-5.7717	3.99787e-07	8.04575e-06	6.2158
MYBL1	-2.07717	9.30827	-5.77158	3.99955e-07	8.04575e-06	6.21539
NPR2	-1.3037	5.58105	-5.77153	4.00036e-07	8.04575e-06	6.21519
OXCT2	2.88011	4.00612	5.77151	4.00063e-07	8.04575e-06	6.21512
SPOCK2	-1.64795	12.8074	-5.77082	4.01068e-07	8.05682e-06	6.21269
IGKV1-6	2.29149	8.29923	5.77076	4.01164e-07	8.05682e-06	6.21246
CAMK2D	-1.1013	9.85547	-5.76959	4.02879e-07	8.08158e-06	6.20832
RORA	-1.81424	10.5385	-5.76955	4.02948e-07	8.08158e-06	6.20815
AC099336.2	-1.05116	11.9054	-5.76687	4.06918e-07	8.15563e-06	6.19863
C10orf88	-0.588855	8.01322	-5.76619	4.07925e-07	8.1702e-06	6.19623
IRAK1BP1	-1.13738	5.8922	-5.76518	4.09444e-07	8.19504e-06	6.19263
NGRN	-0.564704	10.4076	-5.76387	4.11405e-07	8.22866e-06	6.18799
AC136632.1	-1.7149	2.59241	-5.76344	4.12052e-07	8.23599e-06	6.18646
ZNF285	-1.00644	5.7445	-5.75816	4.20095e-07	8.39102e-06	6.1677
NUDT11	-1.68137	3.76382	-5.7577	4.20801e-07	8.39939e-06	6.16607
SERPINE3	1.42135	2.33952	5.75737	4.21311e-07	8.40386e-06	6.16489
C11orf1	-0.572406	7.56515	-5.75703	4.21843e-07	8.40874e-06	6.16367
BCL2L2	0.702537	8.5617	5.75666	4.22415e-07	8.41441e-06	6.16235
HROB	1.96906	6.08292	5.75516	4.24745e-07	8.45509e-06	6.15701
ZNF541	-1.84572	2.31563	-5.75475	4.25379e-07	8.45796e-06	6.15557
YBX1	-0.891438	14.059	-5.75469	4.25467e-07	8.45796e-06	6.15536
AGFG2	-0.858325	8.72397	-5.75299	4.28131e-07	8.49938e-06	6.14931
DUSP14	-1.14886	6.51528	-5.75273	4.28533e-07	8.50161e-06	6.1484
ZSCAN2	-0.508957	8.04917	-5.75147	4.30513e-07	8.53511e-06	6.14392
RPL21P28	-1.73421	3.37361	-5.75037	4.3225e-07	8.55796e-06	6.14001
SORBS3	-1.38832	8.62571	-5.74957	4.33523e-07	8.57737e-06	6.13716
ZMYM6	-0.526681	10.1144	-5.74882	4.34705e-07	8.59495e-06	6.13452
CCL28	-1.12955	7.25041	-5.74816	4.35754e-07	8.6099e-06	6.13218
AC010332.3	-1.30996	3.92511	-5.74504	4.40766e-07	8.69719e-06	6.12108
TRAC	-2.0107	12.5619	-5.74369	4.42939e-07	8.73419e-06	6.1163
STAT4	-1.33135	10.4641	-5.74252	4.44854e-07	8.76581e-06	6.11212
CD8B	-2.0681	9.59735	-5.74234	4.45141e-07	8.76581e-06	6.11149
OSGEP	-0.577054	9.98523	-5.74169	4.46203e-07	8.78083e-06	6.10918
DENND2D	-1.12507	11.8491	-5.74127	4.46888e-07	8.7884e-06	6.10769
SYT17	-1.07447	5.20843	-5.74068	4.47854e-07	8.80149e-06	6.10559
MSANTD2	-1.03464	7.76626	-5.73757	4.52973e-07	8.89016e-06	6.09456
MCTP1	0.8116	10.8181	5.73697	4.53976e-07	8.90213e-06	6.09242
JAG1	1.00744	8.37801	5.73684	4.54191e-07	8.90213e-06	6.09196
CLEC10A	-2.33346	7.82291	-5.73664	4.54521e-07	8.90266e-06	6.09125
IGLC1	2.72996	13.7444	5.73542	4.56552e-07	8.93646e-06	6.08692
GCSAM	-1.43735	8.22087	-5.7333	4.60105e-07	8.99999e-06	6.0794
AL031432.2	2.20669	3.8143	5.73223	4.61915e-07	9.01914e-06	6.07559
CLEC4D	1.97718	10.9341	5.73217	4.62007e-07	9.01914e-06	6.0754
TMEM30B	-1.90989	5.38543	-5.73108	4.63857e-07	9.04923e-06	6.07152
ARHGEF9	-0.830796	8.80434	-5.73075	4.64413e-07	9.05404e-06	6.07036
SARM1	-0.704798	9.1191	-5.72939	4.66731e-07	9.09318e-06	6.06552
PCED1A	-0.69247	9.0257	-5.7287	4.67905e-07	9.11e-06	6.06309
ZNF687	0.603697	11.0336	5.72439	4.75341e-07	9.24532e-06	6.04779
TOM1	0.87673	11.4753	5.72431	4.75486e-07	9.24532e-06	6.04749
MTHFD2	0.73269	11.148	5.72297	4.77827e-07	9.28468e-06	6.04272
NCALD	-1.35865	8.80423	-5.72238	4.78852e-07	9.29842e-06	6.04064
TRBV6-2	-2.08094	5.4399	-5.72025	4.82597e-07	9.36495e-06	6.03308
OR2B6	2.59525	5.64714	5.71981	4.83374e-07	9.37382e-06	6.03152
SMAD3	-0.876155	10.8937	-5.71928	4.84318e-07	9.38002e-06	6.02963
TPT1P3	-0.778831	0.245931	-5.71927	4.84334e-07	9.38002e-06	6.0296
AC139495.1	2.72597	8.88266	5.71671	4.88887e-07	9.45812e-06	6.02052
KIF13B	0.758588	10.7136	5.71664	4.89013e-07	9.45812e-06	6.02027
TRPM2	1.30286	10.1458	5.71357	4.9452e-07	9.55832e-06	6.0094
COL6A2	-1.85517	8.07241	-5.71321	4.95182e-07	9.56263e-06	6.0081
KRBOX4	-0.600103	8.33738	-5.71309	4.95395e-07	9.56263e-06	6.00768
TFE3	0.677102	12.3619	5.71275	4.96006e-07	9.56811e-06	6.00649
NDUFA5	-0.573833	10.2699	-5.71093	4.99327e-07	9.62585e-06	6.00001
CCNY	-0.595744	12.1907	-5.71062	4.99877e-07	9.62692e-06	5.99894
TMEM168	-0.614421	9.62303	-5.71054	5.0004e-07	9.62692e-06	5.99863
TRMT10C	-0.563413	9.00354	-5.70957	5.01815e-07	9.65475e-06	5.99519
COLQ	-1.48298	7.57025	-5.70931	5.02278e-07	9.65731e-06	5.9943
ERMARD	-0.520698	8.63558	-5.70843	5.03903e-07	9.68221e-06	5.99116
DUX4L50	1.31237	7.19249	5.70794	5.04802e-07	9.69313e-06	5.98943
LMNB2	0.92873	9.79954	5.70744	5.0573e-07	9.70459e-06	5.98765
TLR5	1.62657	10.3674	5.70671	5.07082e-07	9.72417e-06	5.98506
PNRC2	-0.723659	12.6136	-5.70152	5.1678e-07	9.89717e-06	5.96668
RPL8	-1.00934	14.1346	-5.69902	5.21538e-07	9.96887e-06	5.95778
EEF1A1P17	-1.5605	1.15016	-5.69888	5.21796e-07	9.96887e-06	5.9573
H2BC13	2.10869	1.80734	5.69876	5.22019e-07	9.96887e-06	5.95689
FCER1A	-4.62515	7.1491	-5.69866	5.22224e-07	9.96887e-06	5.95651
MKS1	-0.562684	7.41758	-5.69745	5.24527e-07	1.00062e-05	5.95224
VN1R1	-1.31179	3.02499	-5.69728	5.24864e-07	1.00062e-05	5.95162
TRAV8-3	-2.10028	5.74891	-5.69614	5.27054e-07	1.00414e-05	5.94758
ZNF540	-1.6046	6.82169	-5.69528	5.28704e-07	1.00663e-05	5.94454
CIP2A	1.04629	7.97002	5.69434	5.30518e-07	1.00911e-05	5.94122
MANSC1	1.48413	11.4895	5.69415	5.30891e-07	1.00911e-05	5.94054
CCDC183	-0.782028	5.51756	-5.69408	5.31036e-07	1.00911e-05	5.94027
EEF1A1P22	-1.43787	3.50328	-5.69366	5.31843e-07	1.00998e-05	5.9388
ZNF608	3.32535	8.89321	5.69301	5.33115e-07	1.01174e-05	5.93648
SDHAF4	-0.618247	6.46143	-5.69278	5.33547e-07	1.01191e-05	5.9357
PLAAT4	-1.30358	10.5804	-5.69142	5.3622e-07	1.01566e-05	5.93085
ARHGEF4	-1.3392	4.83793	-5.69022	5.38575e-07	1.01944e-05	5.9266
DOCK8-AS1	0.942903	6.34392	5.69005	5.3891e-07	1.01944e-05	5.92599
FAM227B	-0.893019	5.9141	-5.68892	5.41137e-07	1.02299e-05	5.92199
CYB561A3	-0.559105	10.9818	-5.68616	5.46605e-07	1.03266e-05	5.91224
TNRC6C	-0.672274	10.9422	-5.68541	5.48106e-07	1.03411e-05	5.90958
CHPF	1.87907	8.34677	5.68539	5.48153e-07	1.03411e-05	5.90949
TRMT2B	-0.510221	9.42945	-5.68502	5.48885e-07	1.03411e-05	5.9082
CDC37L1	-0.610959	9.02372	-5.68501	5.48915e-07	1.03411e-05	5.90814
ANKRD19P	-0.976706	5.26073	-5.6849	5.49135e-07	1.03411e-05	5.90776
HOPX	-1.39811	8.93439	-5.6842	5.50534e-07	1.03608e-05	5.90529
RPL19P21	-1.13497	0.486157	-5.68376	5.51433e-07	1.0371e-05	5.90371
FYN	-1.07995	12.4968	-5.68261	5.53743e-07	1.04058e-05	5.89965
LTB4R	1.08267	11.9155	5.68193	5.5513e-07	1.04149e-05	5.89722
ARHGAP11A	1.5587	8.24492	5.6819	5.55185e-07	1.04149e-05	5.89713
IGKC	2.19824	16.4151	5.68086	5.57293e-07	1.04477e-05	5.89345
ZNF33B	-0.876367	9.8526	-5.67674	5.65733e-07	1.05992e-05	5.87887
H2BC11	1.43848	8.19237	5.67485	5.69647e-07	1.06608e-05	5.87218
TRGC2	-1.74152	9.72458	-5.67471	5.69938e-07	1.06608e-05	5.87168
CD3E	-1.84452	12.6707	-5.67463	5.70114e-07	1.06608e-05	5.87138
ZNF235	-0.906979	7.40779	-5.67306	5.7339e-07	1.07084e-05	5.86582
GCNT4	-2.26068	7.66474	-5.67287	5.73782e-07	1.07089e-05	5.86516
PINLYP	0.822612	6.39658	5.67188	5.7587e-07	1.07342e-05	5.86164
C5orf34	-0.939143	5.29029	-5.67032	5.79149e-07	1.07884e-05	5.85613
PIM3	1.16156	11.1323	5.66954	5.80804e-07	1.08055e-05	5.85336
TMEM116	-0.727418	7.91136	-5.66714	5.85921e-07	1.08938e-05	5.84485
FEN1	1.20209	9.80004	5.66637	5.8757e-07	1.09131e-05	5.84213
POLR1E	-0.948675	8.69976	-5.6663	5.87704e-07	1.09131e-05	5.8419
GPR68	-1.1888	7.90323	-5.66228	5.96392e-07	1.10534e-05	5.82767
SPAG8	-0.854857	4.48092	-5.66168	5.97712e-07	1.10709e-05	5.82552
SOCS3	1.77737	11.5248	5.66029	6.0074e-07	1.112e-05	5.82062
GABRR2	2.21384	6.36432	5.65925	6.03017e-07	1.11551e-05	5.81695
DDIAS	1.17519	8.6646	5.65425	6.14136e-07	1.13536e-05	5.79923
ZNF677	-1.12352	7.06107	-5.65397	6.14766e-07	1.13553e-05	5.79823
RPS27AP5	-1.584	1.65911	-5.65334	6.16178e-07	1.13698e-05	5.79601
COX20	-0.601033	10.8932	-5.65247	6.18121e-07	1.13985e-05	5.79295
TAGAP	-0.872721	13.3532	-5.65179	6.1967e-07	1.14199e-05	5.79053
IGLV10-54	3.00928	7.40147	5.65144	6.20464e-07	1.14273e-05	5.78928
SYT5	1.47365	4.79722	5.64947	6.24923e-07	1.15022e-05	5.78234
AGTRAP	0.984858	12.1005	5.64628	6.3224e-07	1.16077e-05	5.77105
RPL7P47	-1.49133	1.29919	-5.64555	6.33924e-07	1.16271e-05	5.76847
P3H2	-0.994353	5.18761	-5.64548	6.34087e-07	1.16271e-05	5.76822
ABLIM1	-1.61565	11.8289	-5.64386	6.37853e-07	1.16789e-05	5.76248
GLI1	1.92534	8.69441	5.64379	6.38019e-07	1.16789e-05	5.76222
TRIML2	1.04908	4.22849	5.64372	6.38177e-07	1.16789e-05	5.76198
AC138409.2	-0.921397	7.3729	-5.64357	6.38509e-07	1.16789e-05	5.76148
GATA3	-1.47189	8.95673	-5.641	6.44531e-07	1.17817e-05	5.75237
CHD7	0.939104	11.2201	5.63993	6.47044e-07	1.18203e-05	5.7486
PTPN4	-1.43861	10.9156	-5.6384	6.50677e-07	1.18718e-05	5.74317
LUC7L3	-0.568825	12.0346	-5.63745	6.52917e-07	1.19053e-05	5.73983
IGKV1-17	2.5577	9.44043	5.63661	6.54929e-07	1.19345e-05	5.73685
CLEC5A	1.74072	9.40829	5.63634	6.55577e-07	1.19389e-05	5.73589
ZFP14	-0.917403	8.71988	-5.636	6.56387e-07	1.19462e-05	5.73469
NAB2	-0.767196	7.87668	-5.63489	6.59056e-07	1.19874e-05	5.73076
GDF10	-2.21178	1.66631	-5.63342	6.62586e-07	1.20441e-05	5.72558
SDF2L1	1.4597	8.63089	5.63153	6.67178e-07	1.21113e-05	5.71888
PLA2G4F	1.3641	3.21216	5.63145	6.67367e-07	1.21113e-05	5.7186
RPS3AP47	-1.74825	1.58076	-5.63138	6.67525e-07	1.21113e-05	5.71837
SQOR	0.677775	12.475	5.62716	6.77876e-07	1.22763e-05	5.70345
ANKRD22	2.17306	8.44497	5.62695	6.78409e-07	1.22784e-05	5.70269
MAN1C1	-1.32775	8.74664	-5.62627	6.80091e-07	1.23013e-05	5.70029
PEAR1	1.76397	9.1928	5.62529	6.82514e-07	1.23375e-05	5.69684
HLA-DRB1	-1.60003	12.9674	-5.62392	6.85938e-07	1.23809e-05	5.69198
CCNI2	-1.34225	4.80507	-5.62382	6.86183e-07	1.23809e-05	5.69164
TARBP1	-0.951902	9.35171	-5.62168	6.91562e-07	1.24626e-05	5.68407
DDX47	-0.59198	10.1399	-5.61961	6.96783e-07	1.2549e-05	5.67677
USP32	0.817815	12.4013	5.61775	7.01533e-07	1.26267e-05	5.67018
RECQL4	1.45678	7.40234	5.61484	7.09002e-07	1.27464e-05	5.65991
AP1AR	-0.851784	8.80251	-5.61482	7.09049e-07	1.27464e-05	5.65985
SLC9A8	1.145	11.4905	5.61461	7.09587e-07	1.27482e-05	5.65911
CLRN1	2.16425	1.93167	5.61391	7.11403e-07	1.2773e-05	5.65664
MASTL	0.847222	8.75447	5.61346	7.12563e-07	1.2786e-05	5.65506
PSAT1	1.20031	8.68427	5.61217	7.15924e-07	1.28334e-05	5.65049
CACNB4	-1.50492	6.0461	-5.61211	7.16081e-07	1.28334e-05	5.65028
AC243807.2	-0.822034	8.04624	-5.60964	7.22556e-07	1.29336e-05	5.64155
TMEM14A	-1.11942	6.51727	-5.60859	7.25329e-07	1.29753e-05	5.63784
MLF1	-1.31341	3.87496	-5.60829	7.26125e-07	1.29816e-05	5.63677
ESYT1	-1.05731	12.7405	-5.60519	7.34354e-07	1.31128e-05	5.62584
WASF1	1.58225	7.73561	5.60245	7.41719e-07	1.32362e-05	5.61617
MSX2	-1.92167	2.80712	-5.59936	7.50105e-07	1.3372e-05	5.60527
NLRP12	0.97288	11.7208	5.59931	7.5024e-07	1.3372e-05	5.60509
TRIM7	1.18914	7.37347	5.59909	7.50858e-07	1.33749e-05	5.60429
CTSO	-1.14737	9.91534	-5.59779	7.54418e-07	1.34219e-05	5.59971
FBLN2	-2.04876	4.8813	-5.59745	7.55355e-07	1.34219e-05	5.5985
SEMA4C	-1.03605	8.5578	-5.5973	7.55759e-07	1.34219e-05	5.59799
IGKV1-27	2.78468	9.28531	5.59729	7.55788e-07	1.34219e-05	5.59795
KRTAP29-1	-1.56021	0.835561	-5.59672	7.57352e-07	1.34415e-05	5.59594
ZNF491	-1.19386	4.73618	-5.59563	7.60361e-07	1.34867e-05	5.5921
MICU3	-2.04702	4.43416	-5.59547	7.60825e-07	1.34868e-05	5.59151
CHST10	-0.907536	6.43954	-5.59499	7.62135e-07	1.35019e-05	5.58984
DAB1	-2.30016	3.78962	-5.59463	7.63149e-07	1.35116e-05	5.58855
KIAA1958	1.55666	8.96815	5.59397	7.64972e-07	1.35358e-05	5.58624
CD3G	-1.78366	10.7529	-5.59358	7.66068e-07	1.35426e-05	5.58485
ZFP90	-0.871407	9.73983	-5.59253	7.68986e-07	1.35822e-05	5.58116
ASAH2B	-1.03564	5.94219	-5.59076	7.73974e-07	1.36538e-05	5.57489
BEX2	-1.61884	6.74141	-5.59022	7.75495e-07	1.36724e-05	5.57299
ESYT2	-0.77407	12.0008	-5.58973	7.76868e-07	1.36813e-05	5.57128
IGLV9-49	2.8954	7.52654	5.58971	7.76932e-07	1.36813e-05	5.5712
M6PR	-0.669096	12.7952	-5.58943	7.77732e-07	1.36872e-05	5.5702
CRTAM	-1.51657	7.82708	-5.5888	7.7951e-07	1.37102e-05	5.56798
BTBD11	-1.22395	8.2565	-5.58728	7.83827e-07	1.37698e-05	5.56263
ZBTB5	-0.719209	8.64573	-5.58728	7.83839e-07	1.37698e-05	5.56261
LTBP3	-1.18989	9.47647	-5.58694	7.84791e-07	1.37783e-05	5.56144
CRYGS	-1.01294	5.9752	-5.58654	7.8595e-07	1.37904e-05	5.56001
FP565260.6	-0.740358	10.6134	-5.58504	7.9025e-07	1.38492e-05	5.55472
SGO2	0.840147	8.2982	5.58428	7.92446e-07	1.38794e-05	5.55203
HNRNPA3P6	2.14646	6.68706	5.58404	7.93115e-07	1.38828e-05	5.55121
MRPS6	-0.63504	9.87744	-5.5829	7.96414e-07	1.39322e-05	5.54718
GSTA4	-1.25122	4.75893	-5.58249	7.97622e-07	1.39451e-05	5.54571
ADORA1	-2.36087	1.78341	-5.58087	8.02318e-07	1.40188e-05	5.54002
CD4	-1.63587	12.5732	-5.58057	8.03208e-07	1.4026e-05	5.53895
YBX2P1	1.99679	3.48338	5.57918	8.07266e-07	1.40885e-05	5.53406
BCKDHB	-0.814453	7.68364	-5.57891	8.08062e-07	1.40921e-05	5.53311
FCGR1B	1.64263	10.7307	5.57878	8.08438e-07	1.40921e-05	5.53266
ZNF30	-1.5005	6.40467	-5.57814	8.10321e-07	1.41165e-05	5.5304
FBXO4	-0.588282	7.60613	-5.57726	8.12932e-07	1.41536e-05	5.52728
DDRGK1	0.52265	9.62889	5.57466	8.20661e-07	1.42712e-05	5.51811
METTL24	-1.25529	0.802547	-5.57365	8.23671e-07	1.43151e-05	5.51456
ANO2	2.14401	3.81308	5.57093	8.31865e-07	1.44446e-05	5.50496
ANKRD44	-0.681027	12.7287	-5.57084	8.32127e-07	1.44446e-05	5.50466
MTND5P32	1.89938	2.19955	5.57068	8.32605e-07	1.44446e-05	5.5041
S100A12	1.95377	13.3466	5.5703	8.33784e-07	1.44565e-05	5.50273
MTATP6P1	-1.05532	13.4451	-5.56903	8.37624e-07	1.45145e-05	5.49827
MGAM	1.71667	14.3237	5.5688	8.38334e-07	1.45182e-05	5.49745
ZNF56	-0.738514	5.32876	-5.56836	8.39665e-07	1.45327e-05	5.49591
CD244	-1.14862	9.96183	-5.56755	8.42143e-07	1.4567e-05	5.49306
GP6	1.86143	8.10143	5.56581	8.47509e-07	1.46512e-05	5.4869
CA4	2.4267	9.70708	5.56527	8.49148e-07	1.46622e-05	5.48503
HSD17B14	-1.9015	2.13886	-5.56428	8.52232e-07	1.46928e-05	5.48151
ACSM3	-0.938642	7.6899	-5.56421	8.52424e-07	1.46928e-05	5.48129
PABPC1P7	-1.6792	1.55456	-5.56143	8.61091e-07	1.48334e-05	5.47149
EEF1A1	-1.07686	17.9542	-5.56095	8.62585e-07	1.48504e-05	5.46981
KDM6B	0.839772	13.256	5.56071	8.6334e-07	1.48547e-05	5.46896
CTTNBP2	-2.59653	1.83617	-5.55809	8.71615e-07	1.49855e-05	5.45971
DHRS9	1.62605	10.6452	5.55794	8.7208e-07	1.49855e-05	5.45919
PLD4	-2.01729	7.59683	-5.55679	8.75748e-07	1.50329e-05	5.45513
SPACA7	1.39904	3.73511	5.55515	8.80974e-07	1.51138e-05	5.44936
JMJD6	0.698038	10.2326	5.55469	8.82439e-07	1.51289e-05	5.44775
ESRP1	-1.45358	0.811882	-5.55443	8.83275e-07	1.51289e-05	5.44683
ACVR2A	-1.11498	7.65059	-5.55417	8.84124e-07	1.51289e-05	5.4459
TRBV7-9	-1.92512	7.01426	-5.55413	8.84245e-07	1.51289e-05	5.44577
DPP4	-1.67925	9.34135	-5.55395	8.84818e-07	1.51289e-05	5.44514
CACNG6	-3.39181	2.94369	-5.55378	8.85372e-07	1.51289e-05	5.44453
PARP15	-1.02153	10.6491	-5.55375	8.85473e-07	1.51289e-05	5.44442
BMX	2.38465	8.93047	5.55336	8.86713e-07	1.51413e-05	5.44306
TXN	0.831216	11.5886	5.55319	8.87268e-07	1.51419e-05	5.44246
LCK	-1.58598	11.7385	-5.55232	8.90084e-07	1.51812e-05	5.43939
IGKV3-11	2.68378	9.90335	5.55044	8.96201e-07	1.52766e-05	5.43275
VNN1	2.42253	11.9274	5.54959	8.9895e-07	1.53092e-05	5.42978
FBXO7	-1.68688	13.501	-5.54953	8.9916e-07	1.53092e-05	5.42955
NPTXR	-1.43331	7.015	-5.54768	9.05219e-07	1.54034e-05	5.42304
ANKAR	-0.792678	6.16581	-5.54583	9.11324e-07	1.54983e-05	5.41653
ZDHHC4P1	2.70363	2.77355	5.54528	9.13147e-07	1.55203e-05	5.41459
HABP4	-1.08141	8.07244	-5.54445	9.159e-07	1.55502e-05	5.41167
FAM3D	-1.80779	1.54095	-5.54432	9.16332e-07	1.55502e-05	5.41122
IGSF22	-1.45637	2.94024	-5.54427	9.16498e-07	1.55502e-05	5.41104
RPL39P3	-0.999051	10.2173	-5.54128	9.26507e-07	1.57018e-05	5.40051
MTERF2	-0.876243	7.59465	-5.54111	9.27082e-07	1.57025e-05	5.39991
PXK	0.697823	11.5344	5.54078	9.28206e-07	1.57125e-05	5.39874
OFD1	-0.658287	10.1681	-5.54042	9.29405e-07	1.57237e-05	5.39749
TIFAB	-3.32714	4.30567	-5.54014	9.30366e-07	1.57309e-05	5.39648
ADAM19	0.866793	12.9142	5.5379	9.37948e-07	1.58408e-05	5.38862
BAZ1A	0.600071	13.0831	5.53566	9.45609e-07	1.5937e-05	5.38073
ADAM22	-0.98357	6.30679	-5.53561	9.45772e-07	1.5937e-05	5.38057
OCIAD2	-0.967181	8.41601	-5.5356	9.45823e-07	1.5937e-05	5.38051
FNTA	-0.515833	11.3285	-5.53544	9.46363e-07	1.5937e-05	5.37996
ASPH	1.63292	11.2598	5.53355	9.52905e-07	1.60379e-05	5.37328
GPR18	-1.43675	8.34927	-5.53111	9.61357e-07	1.61709e-05	5.36473
CAMK4	-1.93225	9.90153	-5.53004	9.65124e-07	1.62249e-05	5.36094
H2AC20	1.53651	3.76138	5.52869	9.6986e-07	1.62856e-05	5.35619
TRAPPC2B	-0.865822	6.33779	-5.52838	9.70955e-07	1.62856e-05	5.3551
AC004453.1	-1.66492	1.66302	-5.52664	9.77111e-07	1.63703e-05	5.34897
GLMN	-0.595053	7.66967	-5.52658	9.7731e-07	1.63703e-05	5.34878
MEX3C	-0.812367	10.5699	-5.52644	9.77825e-07	1.63703e-05	5.34827
FERMT3	0.763813	13.4877	5.52632	9.78239e-07	1.63703e-05	5.34785
ATP6AP2	-0.527845	12.5524	-5.52536	9.81651e-07	1.6418e-05	5.34448
CA11	-1.14011	6.42094	-5.52471	9.83974e-07	1.64475e-05	5.34219
AC138827.1	2.38111	9.02699	5.52282	9.9073e-07	1.6551e-05	5.33556
B4GAT1	-0.828698	6.68399	-5.52177	9.94533e-07	1.6605e-05	5.33185
TRPC1	-1.80364	4.99287	-5.52076	9.98194e-07	1.66495e-05	5.32828
TMC5	-2.11261	7.30542	-5.52072	9.98334e-07	1.66495e-05	5.32815
CRACD	1.81538	5.17298	5.51951	1.00272e-06	1.67132e-05	5.3239
PLEKHH3	1.44201	5.05992	5.5189	1.00495e-06	1.67357e-05	5.32175
AC008026.1	-1.9043	1.58585	-5.51882	1.00522e-06	1.67357e-05	5.32149
CTIF	0.698833	8.66691	5.51601	1.01551e-06	1.68737e-05	5.31161
GIMAP7	-1.35761	12.3605	-5.51593	1.01583e-06	1.68737e-05	5.31132
GGT7	-0.973105	7.49349	-5.51587	1.01605e-06	1.68737e-05	5.31111
DTX3	-1.17001	8.07229	-5.51578	1.01638e-06	1.68737e-05	5.31079
ZNF584	-0.558358	6.59414	-5.51539	1.01784e-06	1.68882e-05	5.3094
DIMT1	-0.653666	10.2921	-5.51427	1.02195e-06	1.69229e-05	5.30549
TXNDC11	1.21084	11.7883	5.5142	1.02224e-06	1.69229e-05	5.30522
BVES	1.93032	4.85994	5.51397	1.02307e-06	1.69272e-05	5.30443
DISP1	-0.820337	6.66493	-5.51246	1.02871e-06	1.70103e-05	5.2991
LDLR	0.966659	9.98007	5.51231	1.02926e-06	1.70103e-05	5.29859
CD8A	-1.82363	11.2364	-5.51153	1.03216e-06	1.70487e-05	5.29586
SLC35F3	-2.80399	2.93297	-5.51097	1.03426e-06	1.70737e-05	5.29389
TRAJ36	-1.92349	2.41053	-5.50929	1.04059e-06	1.71522e-05	5.28798
CD2	-1.61807	11.5666	-5.50842	1.04387e-06	1.71707e-05	5.28493
ZNF14	-0.882557	8.95902	-5.50818	1.04481e-06	1.71707e-05	5.28406
JAK3	0.775467	13.4769	5.50814	1.04496e-06	1.71707e-05	5.28392
TRIOBP	0.839158	10.5911	5.50793	1.04575e-06	1.71707e-05	5.28318
ZNF85	-0.77243	7.22716	-5.50793	1.04575e-06	1.71707e-05	5.28318
HOXB13	1.62318	4.48392	5.50786	1.046e-06	1.71707e-05	5.28295
SYTL5	-1.03422	0.244113	-5.50569	1.05427e-06	1.72968e-05	5.27532
ZNF528	-0.857009	7.91848	-5.50451	1.05879e-06	1.73614e-05	5.27117
ZNF568	-0.841038	7.57539	-5.50411	1.06033e-06	1.73684e-05	5.26977
MST1L	-1.40141	4.7534	-5.50409	1.06041e-06	1.73684e-05	5.2697
ZXDB	-1.10528	8.57757	-5.50339	1.06311e-06	1.73969e-05	5.26723
SHKBP1	0.892607	13.4718	5.50333	1.06334e-06	1.73969e-05	5.26702
TMEM181	-0.768545	10.2482	-5.50294	1.06484e-06	1.74118e-05	5.26565
NOTCH2NLA	1.21867	8.62163	5.50255	1.06634e-06	1.74266e-05	5.26429
ZNF569	-0.869643	7.45682	-5.50096	1.07251e-06	1.75151e-05	5.2587
NSD2	0.7352	10.9326	5.50085	1.07295e-06	1.75151e-05	5.2583
ATP2B1	-0.846493	11.8788	-5.50006	1.07601e-06	1.75553e-05	5.25554
PDE6B	-0.88	7.14759	-5.49954	1.07804e-06	1.75786e-05	5.25371
IL27	1.65997	5.37739	5.49883	1.08084e-06	1.76145e-05	5.2512
MOSMO	-0.646715	8.171	-5.49837	1.08265e-06	1.76341e-05	5.24958
TNFSF14	0.909649	11.5127	5.4968	1.08881e-06	1.77247e-05	5.24408
MAPRE2	-0.595925	11.555	-5.49472	1.09706e-06	1.78391e-05	5.23677
IGHV3-20	3.47123	8.67203	5.49181	1.10869e-06	1.80065e-05	5.22655
CFLAR	0.844672	14.879	5.49168	1.1092e-06	1.80065e-05	5.22611
ARSK	-0.754287	6.99947	-5.49045	1.11416e-06	1.8077e-05	5.22179
LARP1P1	1.92874	3.09021	5.48907	1.11976e-06	1.81579e-05	5.21692
Z95152.1	2.32958	4.29145	5.48783	1.12479e-06	1.82233e-05	5.21258
RPL5P32	-0.720302	0.193889	-5.48566	1.13368e-06	1.8353e-05	5.20496
FGFR4	1.1639	4.45525	5.48507	1.13613e-06	1.83826e-05	5.20287
ZNF395	-0.74805	10.2536	-5.48233	1.14743e-06	1.85552e-05	5.19328
ZNF420	-1.0399	8.0248	-5.48193	1.1491e-06	1.85719e-05	5.19187
LZTFL1	-0.670125	8.41115	-5.47811	1.16515e-06	1.88209e-05	5.17843
ATXN10	-0.591896	10.8774	-5.47788	1.1661e-06	1.88259e-05	5.17764
KLHL31	-1.47529	1.97676	-5.47623	1.17308e-06	1.89215e-05	5.17186
POLR2M	-0.89784	10.2834	-5.47618	1.17331e-06	1.89215e-05	5.17167
HNRNPCP1	-0.919843	5.61999	-5.47585	1.17471e-06	1.89337e-05	5.17051
RCN2	-0.757172	9.63184	-5.47544	1.17643e-06	1.8951e-05	5.16909
DYNLT3	-0.891842	9.1047	-5.4741	1.18219e-06	1.90332e-05	5.16437
IGLV3-21	2.93789	10.7998	5.47182	1.19198e-06	1.91579e-05	5.15638
KPNA5	-1.29917	8.36713	-5.47172	1.19243e-06	1.91579e-05	5.15601
UBXN1	-0.536564	11.4142	-5.47161	1.1929e-06	1.91579e-05	5.15563
PIGY	-0.591573	7.5594	-5.47146	1.19352e-06	1.91579e-05	5.15512
AL031985.2	-1.59262	1.14226	-5.47142	1.1937e-06	1.91579e-05	5.15498
ABRAXAS1	-0.897025	9.09678	-5.47129	1.19426e-06	1.91579e-05	5.15452
EEF1B2P3	-1.79329	3.15001	-5.47124	1.19451e-06	1.91579e-05	5.15432
ZNF542P	-1.07288	8.02166	-5.4702	1.199e-06	1.92195e-05	5.15068
HNRNPA1L2	-0.905103	7.45916	-5.46954	1.20186e-06	1.92548e-05	5.14838
RPL3P9	-1.1782	0.671945	-5.46879	1.20515e-06	1.92969e-05	5.14573
CRTAP	-0.824288	11.7096	-5.46825	1.2075e-06	1.93239e-05	5.14385
ACVR2B	-1.251	7.4351	-5.46672	1.21421e-06	1.94101e-05	5.13848
AL645941.2	-1.70301	3.89263	-5.466	1.21738e-06	1.94502e-05	5.13595
LRATD2	-1.45475	8.19085	-5.46516	1.22106e-06	1.94984e-05	5.13302
RFTN1	-0.859379	10.5311	-5.46432	1.22481e-06	1.95411e-05	5.13006
TRBV29-1	-2.05622	6.86441	-5.46426	1.22507e-06	1.95411e-05	5.12985
FBLN5	-1.80196	7.3686	-5.46327	1.22947e-06	1.96006e-05	5.12638
ALG13	-0.615623	9.64883	-5.46258	1.23254e-06	1.96388e-05	5.12397
EEF1A1P24	-1.53463	1.11419	-5.46127	1.2384e-06	1.97215e-05	5.11937
GLS	-0.974273	12.0415	-5.46004	1.24394e-06	1.9799e-05	5.11504
HLA-DOA	-1.39184	9.79574	-5.45873	1.24985e-06	1.98781e-05	5.11045
AC012569.1	1.49409	3.71866	5.45839	1.2514e-06	1.98854e-05	5.10925
TRIM25	0.974419	13.5954	5.45657	1.25967e-06	1.99963e-05	5.10288
TP73	1.67708	6.36141	5.4565	1.25999e-06	1.99963e-05	5.10263
GLUD1	-0.634018	11.9439	-5.4564	1.26043e-06	1.99963e-05	5.10229
AK1	-1.8877	7.51615	-5.45573	1.26349e-06	2.0034e-05	5.09994
SIRPG	-1.57939	8.79289	-5.45554	1.26437e-06	2.00371e-05	5.09927
WNK4	1.49104	3.11927	5.45474	1.26801e-06	2.00838e-05	5.09648
KDM2B	-0.566382	10.3178	-5.45349	1.27377e-06	2.01642e-05	5.09209
RPS3AP44	-1.34349	0.808814	-5.45239	1.27888e-06	2.02341e-05	5.08821
AC125807.1	-1.57767	2.26744	-5.45205	1.28044e-06	2.02394e-05	5.08703
TMEM161B	-0.689447	8.81861	-5.45202	1.28059e-06	2.02394e-05	5.08692
CCNE1	1.44275	7.37404	5.45123	1.28425e-06	2.02863e-05	5.08415
SIN3A	-0.534761	11.885	-5.45103	1.28516e-06	2.02897e-05	5.08347
NECAP2	-0.627582	11.698	-5.45088	1.28585e-06	2.02898e-05	5.08294
IFFO2	-0.808934	10.0791	-5.45046	1.28782e-06	2.03098e-05	5.08147
TPST2	0.625345	11.7855	5.45015	1.28927e-06	2.03218e-05	5.08037
ADAMTSL4	1.19717	11.4753	5.44811	1.29881e-06	2.04612e-05	5.07323
IQGAP3	2.20345	5.81068	5.44784	1.30007e-06	2.047e-05	5.07229
ESAM	1.62875	9.38054	5.44591	1.3092e-06	2.05974e-05	5.06551
EIF1	-0.612329	13.8032	-5.44583	1.30957e-06	2.05974e-05	5.06525
NLGN2	-1.47047	5.97366	-5.44524	1.31239e-06	2.06307e-05	5.06316
FAHD2B	-0.905506	6.70515	-5.44407	1.31793e-06	2.07067e-05	5.05908
H4C5	2.02851	3.43108	5.44317	1.32225e-06	2.07634e-05	5.05591
TLE5	-0.958994	13.1504	-5.44203	1.32768e-06	2.08375e-05	5.05194
SIRT1	-0.658479	10.3969	-5.44188	1.32845e-06	2.08384e-05	5.05138
B9D1	2.27455	4.78758	5.44096	1.33283e-06	2.08961e-05	5.04819
IGHV3-13	3.13321	8.00961	5.43943	1.34024e-06	2.1001e-05	5.04282
TMEM92	2.40859	5.55279	5.43858	1.34439e-06	2.10547e-05	5.03983
SMAD9	-0.933189	5.30115	-5.43793	1.34753e-06	2.10895e-05	5.03757
RPL10P16	-1.05423	4.89983	-5.43783	1.34805e-06	2.10895e-05	5.03719
CNIH1	-0.636289	10.2613	-5.43694	1.35238e-06	2.1135e-05	5.03409
NBPF14	0.737856	12.8955	5.43693	1.3524e-06	2.1135e-05	5.03407
SBF2	0.937749	10.0044	5.435	1.36192e-06	2.12724e-05	5.02728
AC008507.1	-1.41076	3.92246	-5.4324	1.37478e-06	2.14619e-05	5.01818
ZSCAN31	-1.08229	4.41165	-5.43191	1.37722e-06	2.14834e-05	5.01646
NCLN	0.728361	10.9672	5.43182	1.37763e-06	2.14834e-05	5.01617
TRBC1	-1.8373	11.4539	-5.43078	1.38286e-06	2.15535e-05	5.0125
NFE2	1.02074	13.358	5.42948	1.38934e-06	2.16315e-05	5.00798
SMIM10L2A	-1.8697	3.71646	-5.42926	1.39048e-06	2.16377e-05	5.00718
ZNF22	-0.648936	10.0567	-5.42865	1.39351e-06	2.16733e-05	5.00508
DDX10P1	1.58144	4.13948	5.42842	1.39468e-06	2.16801e-05	5.00426
EOMES	-1.54795	9.48957	-5.42762	1.39872e-06	2.17313e-05	5.00146
AK4	1.01687	6.84897	5.42576	1.40816e-06	2.18664e-05	4.99495
RPL13AP7	-1.69652	2.91836	-5.42533	1.41037e-06	2.18849e-05	4.99343
AC139491.5	-1.13603	5.3279	-5.42523	1.41084e-06	2.18849e-05	4.9931
CYREN	0.806064	11.1712	5.42383	1.41801e-06	2.19727e-05	4.9882
SLC29A2	-1.10046	6.13394	-5.42275	1.42357e-06	2.20473e-05	4.98441
TUBE1	-0.8212	8.01765	-5.4216	1.42949e-06	2.21272e-05	4.98039
ZBTB40	-0.61355	10.691	-5.42121	1.43149e-06	2.21465e-05	4.97903
SLC30A4	-0.906469	7.57777	-5.42079	1.43367e-06	2.21686e-05	4.97756
ANXA3	2.25103	11.8969	5.42005	1.43754e-06	2.22166e-05	4.97495
RPL7AP31	-1.45317	1.99213	-5.4195	1.44037e-06	2.22486e-05	4.97305
RRP12	0.847801	11.2279	5.41895	1.44325e-06	2.22814e-05	4.97111
DSCC1	1.29745	6.38762	5.41836	1.44635e-06	2.23057e-05	4.96904
C15orf41	-0.761688	6.61342	-5.41728	1.45197e-06	2.23807e-05	4.96528
HDHD2	-0.540271	9.81319	-5.41511	1.4634e-06	2.25423e-05	4.95769
DLG2	-1.26808	3.32546	-5.415	1.46399e-06	2.25423e-05	4.95729
SLC43A3	0.583616	10.9017	5.41484	1.46483e-06	2.25433e-05	4.95674
H1-2	1.547	9.81233	5.41408	1.46889e-06	2.25939e-05	4.95406
TCTE3	-0.940121	5.53583	-5.4125	1.4773e-06	2.27114e-05	4.94853
CD28	-1.72229	10.3012	-5.41171	1.48152e-06	2.27525e-05	4.94577
ZNF418	-1.03234	6.30978	-5.41171	1.48153e-06	2.27525e-05	4.94576
SPI1	0.883786	14.1949	5.41106	1.48499e-06	2.27937e-05	4.9435
METTL22	0.72483	8.7978	5.41064	1.48727e-06	2.28168e-05	4.94202
CD74	-1.2032	15.9986	-5.40988	1.49136e-06	2.28617e-05	4.93936
LY9	-1.32943	9.97661	-5.4098	1.49176e-06	2.28617e-05	4.9391
GAL3ST4	-1.17297	6.87812	-5.40944	1.49369e-06	2.28794e-05	4.93785
TRAM2	1.29546	11.1233	5.40784	1.50235e-06	2.29999e-05	4.93225
NSG2	2.3941	4.10474	5.4065	1.50967e-06	2.30999e-05	4.92755
SEPTIN9	-0.83051	13.6314	-5.40323	1.52759e-06	2.33609e-05	4.91612
SPIN3	-1.11735	5.45702	-5.4031	1.52832e-06	2.33609e-05	4.91566
TRAV13-2	-1.88466	5.3693	-5.40191	1.53491e-06	2.34494e-05	4.91149
MB21D2	-1.55217	6.06241	-5.40166	1.5363e-06	2.34583e-05	4.91062
CD40LG	-1.69852	8.64304	-5.39698	1.56245e-06	2.38329e-05	4.89427
DPY19L4	-0.829648	8.20965	-5.39619	1.56689e-06	2.38882e-05	4.89152
ADCY4	1.22874	8.93728	5.39583	1.56894e-06	2.39069e-05	4.89026
B3GLCT	-0.783558	7.65786	-5.39434	1.57741e-06	2.40236e-05	4.88505
SIGLEC9	0.929427	11.2848	5.39414	1.57857e-06	2.40288e-05	4.88433
AUTS2	-1.4409	8.7751	-5.3938	1.58051e-06	2.40458e-05	4.88315
TRBV5-5	-2.0024	3.75634	-5.3924	1.58849e-06	2.41546e-05	4.87827
ROBO3	-1.55047	6.18422	-5.39126	1.59505e-06	2.42417e-05	4.87428
RPL21P92	-0.735335	0.160181	-5.39103	1.5964e-06	2.42497e-05	4.87346
SPTSSB	-2.14139	4.93209	-5.39072	1.59817e-06	2.4264e-05	4.87239
NAIPP1	1.86328	9.27463	5.38807	1.61354e-06	2.44777e-05	4.86313
IGHV3-49	3.02655	7.97514	5.388	1.61391e-06	2.44777e-05	4.8629
SH3D19	-1.21155	3.16796	-5.38764	1.61601e-06	2.44968e-05	4.86164
SCAI	-0.682369	8.13654	-5.38728	1.61813e-06	2.45162e-05	4.86038
RASGRP1	-1.51023	11.0341	-5.38569	1.62742e-06	2.46442e-05	4.85483
TRAJ26	-2.03775	2.06014	-5.383	1.64331e-06	2.4872e-05	4.84543
LYRM7	-0.72658	9.16162	-5.38125	1.65376e-06	2.50172e-05	4.83929
TRAV12-3	-1.6326	6.12664	-5.37908	1.66675e-06	2.51983e-05	4.83171
IGKV1-16	2.44834	9.42897	5.37896	1.66745e-06	2.51983e-05	4.83131
EHBP1L1	0.708679	13.1644	5.37649	1.68235e-06	2.53842e-05	4.8227
DCAF4	-0.756969	7.76585	-5.37493	1.69187e-06	2.54885e-05	4.81724
REXO1L1P	0.952265	5.13936	5.37151	1.71287e-06	2.57877e-05	4.80529
ZMYND11	-1.02204	10.4224	-5.37141	1.71349e-06	2.57877e-05	4.80494
NRIP2	-0.930264	5.69663	-5.37086	1.71687e-06	2.58253e-05	4.80304
ZBTB4	-1.0202	11.1696	-5.36901	1.72837e-06	2.5985e-05	4.79657
C4orf17	1.91076	4.01267	5.36881	1.7296e-06	2.59901e-05	4.79589
UBE3D	-0.655068	6.15978	-5.36667	1.74303e-06	2.61785e-05	4.7884
ZNF583	-0.741258	7.02794	-5.36613	1.74641e-06	2.62159e-05	4.78652
RTL6	-0.917517	9.21564	-5.3657	1.74909e-06	2.62427e-05	4.78504
PKIA	-1.25113	8.11812	-5.36486	1.75442e-06	2.63092e-05	4.78209
TBC1D10A	-0.560906	9.45847	-5.36359	1.76246e-06	2.64076e-05	4.77767
DHRS3	-1.31702	8.11106	-5.36354	1.76279e-06	2.64076e-05	4.77749
CAPRIN2	-0.684656	9.14455	-5.35914	1.79097e-06	2.6816e-05	4.76214
CLK1	-0.673604	12.73	-5.35874	1.79358e-06	2.68184e-05	4.76073
PPP1R17	-3.01414	2.09371	-5.35872	1.7937e-06	2.68184e-05	4.76066
ZNF781	-1.22271	5.19677	-5.35869	1.79387e-06	2.68184e-05	4.76057
ZFHX2	1.38704	4.31502	5.3578	1.79967e-06	2.68913e-05	4.75745
ZNF550	-1.04995	8.21267	-5.35667	1.80698e-06	2.69868e-05	4.75352
B4GALT2	1.38648	7.20351	5.35607	1.8109e-06	2.70316e-05	4.75143
P3H4	-1.02215	5.61103	-5.35529	1.81603e-06	2.7094e-05	4.74869
TCTN1	-0.682382	7.86322	-5.35515	1.81693e-06	2.7094e-05	4.74821
DEPP1	2.40673	6.08323	5.35335	1.82876e-06	2.7254e-05	4.74193
UBE2Q2L	-1.85095	1.90617	-5.35323	1.82952e-06	2.7254e-05	4.74153
DENND6A	-0.544284	10.2165	-5.35252	1.83422e-06	2.72962e-05	4.73904
CDKN2C	1.02076	8.25093	5.35222	1.83623e-06	2.73122e-05	4.73798
CHRNB2	1.47856	2.62958	5.35083	1.8454e-06	2.74348e-05	4.73316
PPP1R2P6	1.69375	1.57683	5.35039	1.84833e-06	2.74527e-05	4.73163
ZBTB1	-0.761789	10.898	-5.35009	1.85036e-06	2.74527e-05	4.73057
SDR39U1	-0.594231	8.14484	-5.34972	1.85281e-06	2.74753e-05	4.72928
IGHV3-73	2.83316	7.8543	5.34948	1.85442e-06	2.74852e-05	4.72844
DEPDC7	-1.54045	4.3685	-5.34894	1.85805e-06	2.75251e-05	4.72655
ANAPC10	-0.54249	7.38623	-5.34639	1.87518e-06	2.77649e-05	4.71767
NEURL1	-1.87165	5.90611	-5.34623	1.87626e-06	2.77668e-05	4.71711
SLCO4C1	1.0384	10.5548	5.34281	1.89955e-06	2.80972e-05	4.70518
MINDY1	0.785144	11.9063	5.34227	1.90323e-06	2.81374e-05	4.7033
EEF1A1P1	-1.25317	0.946863	-5.34166	1.9074e-06	2.81849e-05	4.70118
ARSJ	-1.70446	1.25084	-5.34125	1.9102e-06	2.82091e-05	4.69976
ZNF783	-0.653965	9.01032	-5.33995	1.91916e-06	2.83158e-05	4.69523
ZFP37	-1.52096	5.50831	-5.33878	1.92727e-06	2.84211e-05	4.69115
PRPF39	-0.698703	9.58767	-5.33858	1.92865e-06	2.84272e-05	4.69046
POLR2B	-0.511859	12.2272	-5.33749	1.93625e-06	2.8525e-05	4.68665
LY6G6D	2.53183	3.16908	5.33647	1.94338e-06	2.86155e-05	4.6831
ARF6	-0.561558	12.8055	-5.33615	1.94563e-06	2.86343e-05	4.68198
TRAV4	-1.74313	5.80583	-5.33534	1.95127e-06	2.87029e-05	4.67918
NIBAN2	1.05057	10.8121	5.33378	1.96227e-06	2.88503e-05	4.67374
IGKV3OR2-268	2.9356	4.98589	5.33296	1.96808e-06	2.89211e-05	4.67088
AL592114.1	-1.55776	1.57366	-5.33215	1.97383e-06	2.8991e-05	4.66805
PHLDA3	1.04881	4.5488	5.33164	1.97748e-06	2.90228e-05	4.66626
DBNDD1	-1.98369	5.35824	-5.33157	1.97797e-06	2.90228e-05	4.66603
GPALPP1	-0.557888	9.20752	-5.3305	1.98562e-06	2.9116e-05	4.66229
KNSTRN	0.67681	8.45917	5.3304	1.98631e-06	2.9116e-05	4.66196
SHROOM4	1.72341	5.78149	5.3294	1.99351e-06	2.92069e-05	4.65845
ENTPD7	1.09505	8.53399	5.32915	1.99525e-06	2.92179e-05	4.65761
COQ8A	-0.600023	10.6658	-5.32879	1.99783e-06	2.92409e-05	4.65636
SLC4A3	-2.42837	3.0699	-5.32556	2.02123e-06	2.95688e-05	4.64509
ASIP	-1.54467	1.09781	-5.32479	2.02684e-06	2.9636e-05	4.64241
BMI1	-0.983342	10.3446	-5.32418	2.03126e-06	2.96858e-05	4.6403
PCNP	-0.564094	11.8492	-5.32391	2.03322e-06	2.96996e-05	4.63937
STYX	-0.759867	10.3521	-5.32363	2.03533e-06	2.97156e-05	4.63837
TRBV20-1	-1.64689	7.47945	-5.32341	2.03689e-06	2.97236e-05	4.63762
PPP1R3D	0.901202	10.7541	5.32282	2.04125e-06	2.97724e-05	4.63555
TMEM170A	-0.541661	10.4877	-5.32135	2.05209e-06	2.99007e-05	4.63043
ALDOC	-0.815767	8.94563	-5.32023	2.06032e-06	2.99908e-05	4.62656
UBQLN4	-0.515882	9.96948	-5.32004	2.06178e-06	2.99972e-05	4.62587
FLT4	-1.45595	6.31878	-5.31819	2.07553e-06	3.01822e-05	4.61944
ZNF558	-0.691142	8.53316	-5.31657	2.08768e-06	3.03438e-05	4.6138
ABLIM3	1.68234	9.89204	5.31524	2.09765e-06	3.04736e-05	4.60919
NANS	0.556727	10.2176	5.31496	2.0998e-06	3.04897e-05	4.60819
TRIM51EP	-2.43368	1.28949	-5.31413	2.10605e-06	3.05503e-05	4.60532
GIMAP5	-1.4466	11.9496	-5.3139	2.10778e-06	3.05603e-05	4.60452
NMU	-1.47182	0.709474	-5.31339	2.11167e-06	3.05897e-05	4.60274
SUSD4	-1.88346	5.42089	-5.31336	2.1119e-06	3.05897e-05	4.60263
NT5DC1	-0.54529	9.68247	-5.31273	2.11667e-06	3.06436e-05	4.60045
PSTPIP2	1.15113	11.9959	5.31145	2.12644e-06	3.07699e-05	4.596
TRAJ39	-2.08586	2.64995	-5.31038	2.13464e-06	3.08732e-05	4.59227
N4BP2L1	-0.588886	9.94226	-5.30968	2.14002e-06	3.09358e-05	4.58984
BIN1	-1.03594	10.6851	-5.30944	2.14192e-06	3.0948e-05	4.58898
SMAD1	1.2006	7.38296	5.30911	2.14442e-06	3.09689e-05	4.58785
JMY	-0.837365	9.3759	-5.30874	2.14726e-06	3.09946e-05	4.58657
ZBTB7B	0.710974	12.5716	5.30792	2.15361e-06	3.10709e-05	4.58371
AC005255.1	0.944428	6.4239	5.30752	2.15673e-06	3.11006e-05	4.58231
EVL	-1.3211	12.3189	-5.30721	2.15913e-06	3.11199e-05	4.58124
TFAP4	-0.523364	8.2009	-5.30706	2.16029e-06	3.11213e-05	4.58072
ZFP82	-1.01024	7.51872	-5.3069	2.16152e-06	3.11237e-05	4.58017
BDH2	-0.788824	7.92162	-5.30599	2.16864e-06	3.1211e-05	4.57698
TRBV11-1	-2.27186	4.18278	-5.30482	2.17775e-06	3.13267e-05	4.57293
RPS4Y2	-2.36119	2.37296	-5.30461	2.17938e-06	3.13347e-05	4.57221
OGFR	0.752389	11.8629	5.30328	2.18983e-06	3.14696e-05	4.56758
ZNF354B	-0.909983	7.49043	-5.30312	2.19114e-06	3.14729e-05	4.567
SACM1L	-0.603344	11.3156	-5.301	2.20787e-06	3.16821e-05	4.55964
GADD45A	1.90022	9.3957	5.29993	2.21639e-06	3.17889e-05	4.55591
GRIP1	-1.29782	4.74291	-5.29832	2.22924e-06	3.19531e-05	4.55032
VPS36	-0.535194	11.0887	-5.29689	2.24075e-06	3.20912e-05	4.54534
ZNF77	-0.811731	6.33156	-5.29638	2.24485e-06	3.21342e-05	4.54357
TTLL7	1.22574	6.10661	5.29611	2.24704e-06	3.21498e-05	4.54263
LMTK2	0.715307	11.0971	5.29569	2.25038e-06	3.21693e-05	4.54119
AC114728.1	-1.8051	1.67748	-5.29567	2.2506e-06	3.21693e-05	4.5411
THEM5	-1.24562	5.58011	-5.29529	2.25361e-06	3.21967e-05	4.5398
LY6G6F-LY6G6D	1.95647	2.49354	5.29498	2.2562e-06	3.22179e-05	4.53869
GLS2	-1.93625	4.44873	-5.29248	2.27652e-06	3.24922e-05	4.53002
ST14	1.19251	10.5388	5.29183	2.28186e-06	3.25526e-05	4.52775
HNRNPAB	0.918614	9.04973	5.29079	2.29039e-06	3.26584e-05	4.52415
YWHAH	0.743088	12.3985	5.29023	2.29499e-06	3.26922e-05	4.5222
ZNF589	-0.577497	9.54096	-5.28937	2.30213e-06	3.2778e-05	4.5192
SMTN	1.31119	7.29379	5.28859	2.30856e-06	3.28536e-05	4.5165
IL18BP	-0.854183	8.64203	-5.28689	2.3227e-06	3.30388e-05	4.51059
DET1	-0.533644	7.18552	-5.2862	2.32844e-06	3.31042e-05	4.50821
TCN2	2.00266	9.89751	5.28547	2.3346e-06	3.31758e-05	4.50565
KCNE1	1.87438	8.9536	5.28494	2.33901e-06	3.32224e-05	4.50383
EEF1A1P8	-1.72318	1.63189	-5.28471	2.34094e-06	3.32337e-05	4.50303
ATP9A	1.59372	9.22272	5.28447	2.34297e-06	3.32464e-05	4.50219
KLF12	-1.50919	10.466	-5.28331	2.35277e-06	3.33692e-05	4.49816
AC026877.1	0.854136	9.32214	5.28248	2.3598e-06	3.34528e-05	4.49527
RPS3AP25	-1.53028	1.16991	-5.28215	2.36261e-06	3.34764e-05	4.49412
SEC24D	0.681888	11.3991	5.28182	2.36537e-06	3.34993e-05	4.49299
BIK	1.27491	6.15446	5.27987	2.38202e-06	3.36973e-05	4.4862
GP1BB	4.14823	8.28367	5.27981	2.38255e-06	3.36973e-05	4.48599
MTERF1	-0.600458	8.69219	-5.27957	2.38459e-06	3.36973e-05	4.48516
ASAP1	0.695239	12.8943	5.27956	2.3847e-06	3.36973e-05	4.48512
TCF19	1.03779	9.47533	5.27951	2.3851e-06	3.36973e-05	4.48495
ARL4C	-1.45526	12.1775	-5.27835	2.39502e-06	3.38212e-05	4.48094
YAE1	-0.814075	6.40362	-5.27715	2.40534e-06	3.39342e-05	4.47678
SMIM14	-0.525222	10.8852	-5.27699	2.40679e-06	3.39383e-05	4.4762
ZNF232	-0.65302	7.33038	-5.27641	2.4118e-06	3.3977e-05	4.47418
EIF5A2	-0.954555	7.46342	-5.2764	2.41185e-06	3.3977e-05	4.47417
DSTN	-0.608204	10.4561	-5.27615	2.41401e-06	3.3991e-05	4.4733
CHCHD6	-1.0381	5.19329	-5.27522	2.42213e-06	3.40889e-05	4.47005
ZSCAN26	-0.606738	8.92731	-5.27359	2.43628e-06	3.42717e-05	4.46442
KCTD21	0.673399	9.82761	5.27231	2.44756e-06	3.43825e-05	4.45995
ZC3H8	-0.615194	8.53027	-5.27229	2.44768e-06	3.43825e-05	4.4599
MAF	-1.1258	10.0509	-5.27147	2.45496e-06	3.44683e-05	4.45703
AKAP7	-1.04208	8.09653	-5.27116	2.45766e-06	3.44831e-05	4.45597
MIPOL1	1.01531	9.51939	5.26937	2.47351e-06	3.46789e-05	4.44975
IGLV2-5	2.31855	6.60264	5.2685	2.48126e-06	3.47629e-05	4.44672
TMEM204	-1.48724	8.14076	-5.26843	2.48188e-06	3.47629e-05	4.44649
TXNDC16	-0.547737	8.28363	-5.2675	2.49012e-06	3.48617e-05	4.44328
HPN	1.90373	5.18136	5.26654	2.49877e-06	3.49661e-05	4.43992
BORCS7	-0.661512	8.90609	-5.26622	2.50159e-06	3.49889e-05	4.43883
RNF207	-0.867887	5.05358	-5.2656	2.50721e-06	3.50508e-05	4.43666
GOLGA6L9	-0.917617	6.86905	-5.26469	2.51535e-06	3.51477e-05	4.43353
RFXAP	-0.622794	7.20136	-5.26322	2.52874e-06	3.53011e-05	4.4284
PPTC7	-0.5898	11.4116	-5.26166	2.54286e-06	3.54814e-05	4.42301
ETNK2	-1.54935	4.25539	-5.26145	2.5448e-06	3.54823e-05	4.42227
TRAJ30	-2.22909	2.60911	-5.26139	2.54535e-06	3.54823e-05	4.42207
OIT3	1.70231	2.20453	5.26067	2.55196e-06	3.55575e-05	4.41956
PIWIL2	-1.23081	3.71071	-5.25975	2.56041e-06	3.56584e-05	4.41636
AC104619.1	-1.31883	0.712347	-5.25889	2.56824e-06	3.57504e-05	4.41341
ZNF639	-0.537666	9.56617	-5.25862	2.57076e-06	3.57684e-05	4.41246
IGKV2D-28	2.2446	10.7123	5.25827	2.57401e-06	3.57967e-05	4.41124
CALM2	-0.527174	13.9364	-5.25807	2.57586e-06	3.58054e-05	4.41054
HMOX2	-0.546007	10.6883	-5.25777	2.57861e-06	3.58174e-05	4.40951
ALKBH2	-0.80214	6.91783	-5.25771	2.57916e-06	3.58174e-05	4.4093
DCAF16	-0.633143	9.73381	-5.25672	2.58835e-06	3.5928e-05	4.40586
EPSTI1	1.85553	12.1934	5.25137	2.63853e-06	3.66071e-05	4.3873
SUCLG2	-0.699414	10.2783	-5.25063	2.64552e-06	3.66867e-05	4.38474
ZBTB25	-0.992446	9.46135	-5.25042	2.64753e-06	3.66972e-05	4.384
FAM43A	-0.877259	7.7961	-5.25016	2.65e-06	3.6714e-05	4.3831
RUNX3	-1.13305	12.0326	-5.24881	2.66287e-06	3.68749e-05	4.37842
THOC1	-0.597092	9.41329	-5.24814	2.66919e-06	3.6945e-05	4.37612
HMGN3	-0.597576	9.90431	-5.24665	2.68351e-06	3.71256e-05	4.37095
AL136295.5	1.21696	7.86149	5.24649	2.68504e-06	3.71293e-05	4.3704
SHLD3	-0.698603	6.48623	-5.24603	2.68951e-06	3.71671e-05	4.36879
RPS9	-0.709384	13.8485	-5.24595	2.69031e-06	3.71671e-05	4.3685
ABHD2	1.44612	12.4458	5.2458	2.69173e-06	3.71692e-05	4.36799
MFSD13A	0.988824	8.51928	5.24524	2.69712e-06	3.7226e-05	4.36606
ECT2	0.761878	8.56223	5.24341	2.71491e-06	3.7454e-05	4.3597
SORT1	1.14205	12.2162	5.24266	2.72213e-06	3.75258e-05	4.35713
MGLL	1.39685	10.0378	5.24261	2.72267e-06	3.75258e-05	4.35694
FAT2	1.37667	4.90411	5.24162	2.7323e-06	3.7627e-05	4.35353
CMTR2	-0.801906	10.025	-5.2416	2.73258e-06	3.7627e-05	4.35343
SUCNR1	2.01885	7.25733	5.24146	2.7339e-06	3.76273e-05	4.35297
TMEM132C	-2.01663	1.62901	-5.24094	2.73901e-06	3.7669e-05	4.35116
RPL13AP5	-1.60184	4.27502	-5.24089	2.73949e-06	3.7669e-05	4.35099
CGN	1.35255	4.70274	5.24063	2.74204e-06	3.76863e-05	4.35009
ABCB6	1.22145	8.15836	5.24031	2.7452e-06	3.76985e-05	4.34898
TRAV22	-1.60036	4.71807	-5.24028	2.7455e-06	3.76985e-05	4.34887
AC068050.1	-2.50204	2.43068	-5.23925	2.75562e-06	3.78197e-05	4.34531
RAB13	1.55062	8.47137	5.23844	2.76369e-06	3.79127e-05	4.34249
POU2AF1	1.53903	11.8523	5.23689	2.7791e-06	3.80884e-05	4.33711
ADGRG6	-1.75854	3.63065	-5.23594	2.78857e-06	3.82004e-05	4.33382
SLC2A5	1.78055	8.94074	5.23552	2.79275e-06	3.82398e-05	4.33237
[truncated: 5,049 more rows]

## Sheet: Supplementary Table 3
Supplementary Table 3. The compounds producing results analyzed by CMAP database.
pert_iname	moa	target_name	raw_cs	fdr_q_nlog10	norm_cs
ARRY-334543	EGFR inhibitor	ERBB2|EGFR|ERBB4	-0.6395	15.6536	-1.9725
BIX-02189	MEK inhibitor	MAP2K5|MAPK7	-0.6304	15.6536	-1.9445
etoposide	Topoisomerase inhibitor	TOP2A|TOP2B|CYP2E1|CYP3A5	-0.6295	15.6536	-1.9418
SB-939	HDAC inhibitor	HDAC1|HDAC2|HDAC10|HDAC3|HDAC4|HDAC5|HDAC9	-0.624	15.6536	-1.9247
cabazitaxel	Tubulin inhibitor	CYP2C8|CYP3A5|SLCO1B3|TUBA4A|TUBB|TUBB1	-0.6239	15.6536	-1.9246
amsacrine	Topoisomerase inhibitor	TOP2A|KCNH2	-0.6179	15.6536	-1.906
amsacrine	Topoisomerase inhibitor	TOP2A|KCNH2	-0.616	15.6536	-1.9
docetaxel	Tubulin inhibitor	TUBB|BCL2|MAP2|MAP4|MAPT|NR1I2|TUBB1	-0.6144	15.6536	-1.8952
teniposide	Topoisomerase inhibitor	TOP2A|CYP3A5|TOP2B	-0.6096	15.6536	-1.8803
palbociclib	CDK inhibitor	CDK4|CDK6|CCND3	-0.6041	15.6536	-1.8635
BX-795	IKK inhibitor	PDPK1|IKBKE|TBK1|CDK2|CHEK1|GSK3B|KDR|PDK1	-0.6019	15.6536	-1.8567
AMG-232	MDM inhibitor	MDM2	-0.6012	15.6536	-1.8543
amonafide	Topoisomerase inhibitor	TOP2A|TOP2B	-0.5997	15.6536	-1.8497
valrubicin	DNA inhibitor|Topoisomerase inhibitor	TOP2A	-0.5983	15.6536	-1.8455
CD-437	Retinoid receptor agonist	RARG	-0.5953	15.6536	-1.8364
purvalanol-a	CDK inhibitor|DYRK inhibitor	CDK1|CDK2|CDK4|CDK5|CCND1|CCNE1|CSNK1G3|RPS6KA1|SRC	-0.5947	15.6536	-1.8345
dacomitinib	EGFR inhibitor	EGFR|ERBB2|ERBB4	-0.5945	15.6536	-1.8338
nutlin-3	MDM inhibitor	MDM2|TP53	-0.5938	15.6536	-1.8317
malonoben	Protein tyrosine kinase inhibitor	EGFR	-0.5938	15.6536	-1.8317
vandetanib	EGFR inhibitor|RET tyrosine kinase inhibitor|VEGFR inhibitor	EGFR|KDR|RET|FLT1|FLT4|PTK6|TEK|FLT3|KIT|EPHA1|EPHA10|EPHA2|EPHA3|EPHA4|EPHA5|EPHA6|EPHA7|EPHA8|EPHB1|EPHB2|EPHB3|EPHB4|EPHB6|ERBB2|ERBB3|ERBB4|SRC|VEGFA	-0.5915	15.6536	-1.8246
teniposide	Topoisomerase inhibitor	TOP2A|CYP3A5|TOP2B	-0.5899	15.6536	-1.8197
Ro-4987655	MEK inhibitor	MAP2K1	-0.5891	15.6536	-1.817
AMG-232	MDM inhibitor	MDM2	-0.5882	15.6536	-1.8145
BX-795	IKK inhibitor	PDPK1|IKBKE|TBK1|CDK2|CHEK1|GSK3B|KDR|PDK1	-0.5871	15.6536	-1.8108
palbociclib	CDK inhibitor	CDK4|CDK6|CCND3	-0.5869	15.6536	-1.8105
etoposide	Topoisomerase inhibitor	TOP2A|TOP2B|CYP2E1|CYP3A5	-0.5819	15.6536	-1.7949
sotrastaurin	PKC inhibitor	PRKCA|PRKCB|PRKCQ|PRKCD|PRKCE|PRKCH	-0.5813	15.6536	-1.7932
BMS-599626	EGFR inhibitor|Receptor tyrosine protein kinase inhibitor	EGFR|ERBB2|ERBB4|ERBB3	-0.5792	15.6536	-1.7865
pimobendan	Calcium channel blocker|Phosphodiesterase inhibitor	PDE3A	-0.5788	15.6536	-1.7853
mepacrine	NFKB inhibitor|Cytokine production inhibitor|p53 activator	TP53|AKT1|MTOR|NFKB1|PLA2G2A|PLA2G2D|PLA2G1B|PLA2G4A|PLA2G6|PLCL1	-0.5786	15.6536	-1.7847
naproxol	Anti-inflammatory	PTGS1|PTGS2	-0.5784	15.6536	-1.7841
BMS-754807	IGF-1 inhibitor	IGF1R|AKT1	-0.5776	15.6536	-1.7815
AZD-9291	EGFR inhibitor	EGFR	-0.5769	15.6536	-1.7796
RG-7388	MDM inhibitor	MDM2|TP53	-0.5757	15.6536	-1.7758
PF-04691502	MTOR inhibitor|PI3K inhibitor	MTOR|PIK3CA|PIK3CB|PIK3CD|PIK3CG	-0.5754	15.6536	-1.7747
XMD-1150	LRRK inhibitor	LRRK2	-0.5752	15.6536	-1.7741
dacinostat	HDAC inhibitor	HDAC1|HDAC2|HDAC3|HDAC4|HDAC5|HDAC6|HDAC7|HDAC8|HDAC9	-0.5749	15.6536	-1.7732
teniposide	Topoisomerase inhibitor	TOP2A|CYP3A5|TOP2B	-0.5748	15.6536	-1.7729
progesterone	Progesterone receptor agonist	PGR|CYP17A1|NR3C2|CYP2C19|CATSPER1|CATSPER2|CATSPER3|CATSPER4|ESR1|OPRK1|TRPC5	-0.5742	15.6536	-1.7711
RS-17053	Adrenergic receptor antagonist	ADRA1A|ADRA1D	-0.573	15.6536	-1.7673
afatinib	EGFR inhibitor	EGFR|ERBB2|ERBB4	-0.5728	15.6536	-1.7667
ibrutinib	BTK inhibitor	BTK|BLK|BMX	-0.5725	15.6536	-1.7658
ibrutinib	BTK inhibitor	BTK|BLK|BMX	-0.5701	15.6536	-1.7585
AST-1306	EGFR inhibitor	EGFR|ERBB2|ERBB4	-0.5696	15.6536	-1.7568
foretinib	VEGFR inhibitor	KDR|MET|AXL|FLT3|KIT|MST1R|TEK|FLT1|FLT4	-0.5696	15.6536	-1.7568
rociletinib	EGFR inhibitor	EGFR	-0.5689	15.6536	-1.7549
valrubicin	DNA inhibitor|Topoisomerase inhibitor	TOP2A	-0.5675	15.6536	-1.7504
naproxol	Anti-inflammatory	PTGS1|PTGS2	-0.5658	15.6536	-1.7453
megestrol-acetate	Progesterone receptor agonist|DNA inhibitor|Steroidal progestin	PGR|NR3C1	-0.5657	15.6536	-1.7448
thioridazine	Dopamine receptor antagonist	DRD2|HTR2A|DRD1|HTR2C|CHRNA7|MALT1|ADRA1A|ADRA1B|DRD3|DRD4|DRD5|HRH1|HTR1A|HTR6|HTR7|KCNH2	-0.5655	15.6536	-1.7442
CEP-33779	JAK inhibitor	JAK2	-0.5651	15.6536	-1.743
JWE-035	Aurora kinase inhibitor	AURKA	-0.5645	15.6536	-1.7414
resminostat	HDAC inhibitor	HDAC1|HDAC2|HDAC3|HDAC6|HDAC8	-0.5627	15.6536	-1.7357
voxtalisib	MTOR inhibitor|PI3K inhibitor	MTOR|PIK3CA	-0.5624	15.6536	-1.7347
tenovins	SIRT inhibitor|p53 activator	SIRT1|SIRT2	-0.562	15.6536	-1.7337
R-547	CDK inhibitor	CDK2|CDK1|CDK4|CCND1|CCNE1|CDK7	-0.5617	15.6536	-1.7326
IKK-16	IKK inhibitor	IKBKB	-0.5614	15.6536	-1.7315
NVP-AEW541	IGF-1 inhibitor	IGF1R|INSR	-0.5611	15.6536	-1.7308
TGX-221	PI3K inhibitor	PIK3CB|PIK3CD	-0.5598	15.6536	-1.7268
etoposide	Topoisomerase inhibitor	TOP2A|TOP2B|CYP2E1|CYP3A5	-0.5588	15.6536	-1.7237
irinotecan	Topoisomerase inhibitor	TOP1|CYP3A5|TOP1MT	-0.5584	15.6536	-1.7225
TAK-733	MEK inhibitor	MAP2K1	-0.558	15.6536	-1.7212
adarotene	Retinoid receptor agonist	RARG|RARA|RARB	-0.5577	15.6536	-1.7202
phloretin	Sodium channel inhibitor	AQP9|CLCN3|SLC23A1	-0.5576	15.6536	-1.7199
KHS-101	Neural stem cell inducer	TACC3	-0.5573	15.6536	-1.7192
ponatinib	Bcr-Abl inhibitor|FLT3 inhibitor|PDGFR inhibitor	ABL1|BCR|FLT3|RET|FGFR1|FGFR2|FGFR3|FGFR4|KIT|TEK|CYP2C8|CYP3A5|FGF2|FLT1|KDR|LCK|LYN|PDGFRA|SRC	-0.5572	15.6536	-1.7189
GSK-1059615	PI3K inhibitor	PIK3CA|PIK3CG	-0.5562	15.6536	-1.7157
valrubicin	DNA inhibitor|Topoisomerase inhibitor	TOP2A	-0.556	15.6536	-1.715
pyrvinium-pamoate	Androgen receptor antagonist|AKT inhibitor	AR	-0.5559	15.6536	-1.7148
mitoxantrone	Topoisomerase inhibitor	TOP2A|PIM1	-0.5557	15.6536	-1.7141
KPT-330	Exportin antagonist	XPO1	-0.5543	15.6536	-1.7096
NCH-51	HDAC inhibitor	HDAC1|HDAC10|HDAC11|HDAC2|HDAC3|HDAC4|HDAC5|HDAC6|HDAC7|HDAC8|HDAC9	-0.5535	15.6536	-1.7072
KHS-101	Neural stem cell inducer	TACC3	-0.5523	15.6536	-1.7036
floxuridine	DNA synthesis inhibitor	TYMS	-0.552	15.6536	-1.7026
erteberel	Estrogen receptor agonist	ESR2|ESR1	-0.5515	15.6536	-1.7012
baricitinib	JAK inhibitor	JAK1|JAK2	-0.5501	15.6536	-1.6967
PD-184352	MEK inhibitor	MAP2K1|MAP2K2|MAP3K1|MAP3K2	-0.5496	15.6536	-1.6952
C-646	Histone acetyltransferase inhibitor	EP300	-0.5496	15.6536	-1.6952
PD-184352	MEK inhibitor	MAP2K1|MAP2K2|MAP3K1|MAP3K2	-0.5495	15.6536	-1.6951
AT-13387	HSP inhibitor	HSP90AA1	-0.5494	15.6536	-1.6947
MEK-162	MEK inhibitor	MAP2K1|MAP2K2|IL1R2|IL6R|TNFRSF1A	-0.5492	15.6536	-1.694
palbociclib	CDK inhibitor	CDK4|CDK6|CCND3	-0.549	15.6536	-1.6936
R-547	CDK inhibitor	CDK2|CDK1|CDK4|CCND1|CCNE1|CDK7	-0.5488	15.6536	-1.6927
RG-7388	MDM inhibitor	MDM2|TP53	-0.5487	15.6536	-1.6924
KHS-101	Neural stem cell inducer	TACC3	-0.5487	15.6536	-1.6924
MGCD-265	VEGFR inhibitor	MET|KDR|AXL	-0.5478	15.6536	-1.6898
triciribine	AKT inhibitor	AKT1|AKT2|AKT3	-0.5476	15.6536	-1.6892
BML-259	CDK inhibitor	CDK2|CDK5	-0.5472	15.6536	-1.6878
lofepramine	Norepinephrine inhibitor|Serotonin reuptake inhibitor	SLC6A2|SLC6A4|HTR1A	-0.5465	15.6536	-1.6858
puromycin	Protein synthesis inhibitor	RPL10L|RPL11|RPL13A|RPL15|RPL19|RPL23|RPL23A|RPL26L1|RPL3|RPL37|RPL8|RSL24D1|SNU13	-0.5464	15.6536	-1.6855
amsacrine	Topoisomerase inhibitor	TOP2A|KCNH2	-0.5464	15.6536	-1.6854
AZD-4547	FGFR inhibitor	FGF2|FGFR1|FGFR2|FGFR3|FGFR4|IGF1R|KDR	-0.5463	15.6536	-1.6851
tamoxifen	Estrogen receptor antagonist|Selective estrogen receptor modulator (SERM)	ESR1|ESR2|CYP3A5|ESRRG|PLD1|PRKCD|PRKCE|PRKCQ|PRKCZ|EBP|GPER1|PRKCA|PRKCB|PRKCG|PRKCI	-0.5462	15.6536	-1.6848
GDC-0980	MTOR inhibitor|PI3K inhibitor	MTOR|PIK3CG|FGR|MAP3K9|PIK3CA|PIK3CB|PIK3CD|SYK	-0.5458	15.6536	-1.6834
BRD-K47869605	Tubulin inhibitor	IGF1R|TOP2A|TUBA4A|TUBB	-0.5454	15.6536	-1.6823
entinostat	HDAC inhibitor	HDAC1|HDAC2|HDAC3|HDAC9	-0.5453	15.6536	-1.6821
torin-1	MTOR inhibitor|PI3K inhibitor	MTOR|PIK3CA	-0.5449	15.6536	-1.6807
PF-03758309	P21 activated kinase inhibitor	PAK4	-0.5448	15.6536	-1.6804
fingolimod	Immunosuppressant|Sphingosine 1 phosphate receptor agonist	S1PR1|S1PR5|S1PR3|S1PR4|CYP2E1|CYP4F2|SPHK1	-0.5447	15.6536	-1.6802
KU-0060648	DNA inhibitor|PI3K inhibitor	PIK3CA|PIK3CB|PIK3CD|PRKDC	-0.5443	15.6536	-1.6788
BML-259	CDK inhibitor	CDK2|CDK5	-0.5439	15.6536	-1.6777
thioridazine	Dopamine receptor antagonist	DRD2|HTR2A|DRD1|HTR2C|CHRNA7|MALT1|ADRA1A|ADRA1B|DRD3|DRD4|DRD5|HRH1|HTR1A|HTR6|HTR7|KCNH2	-0.5428	15.6536	-1.6744
maprotiline	Norepinephrine inhibitor|Tricyclic antidepressant	SLC6A2|ADRA1A|ADRA1B|ADRA1D|ADRA2A|ADRA2B|ADRA2C|CHRM1|CHRM2|CHRM3|CHRM4|CHRM5|DRD2|HRH1|HTR2A|HTR2C|HTR7	-0.5418	15.6536	-1.6713
BRD-K47000838	Tubulin inhibitor	ACTB	-0.5415	15.6536	-1.6704
atorvastatin	HMGCR inhibitor	HMGCR|DPP4|CYP3A5|FASLG|AHR	-0.5413	15.6536	-1.6695
wortmannin	PI3K inhibitor	PLK1|PIK3CA|PIK3CG|ATM|ATR|MTOR|PLK3|PI4KA|PI4KB|PIK3CD|PIK3R1|PRKDC	-0.5407	15.6536	-1.6677
KIN001-127	ITK inhibitor	ITK	-0.5399	15.6536	-1.6654
NVP-ADW742	IGF-1 inhibitor	IGF1R	-0.5397	15.6536	-1.6649
BRD-K68336408	EGFR inhibitor	EGFR|MAPK14	-0.5397	15.6536	-1.6648
levonorgestrel	Estrogen receptor agonist|Glucocorticoid receptor antagonist|Progesterone receptor agonist|Progesterone receptor antagonist	PGR|CYP2E1|AR|ESR1|SRD5A1	-0.5395	15.6536	-1.6641
teniposide	Topoisomerase inhibitor	TOP2A|CYP3A5|TOP2B	-0.5393	15.6536	-1.6636
exemestane	Aromatase inhibitor	CYP19A1	-0.5392	15.6536	-1.6631
GANT-61	GLI antagonist	DHH|IHH|GLI1|GLI2	-0.5391	15.6536	-1.6628
RG-7388	MDM inhibitor	MDM2|TP53	-0.5387	15.6536	-1.6616
terfenadine	Histamine receptor antagonist	HRH1|KCNH2|CHRM1|CHRM2|CHRM3|CHRM4|CHRM5|KCNH1	-0.5384	15.6536	-1.6608
CEP-37440	ALK inhibitor	ALK	-0.5381	15.6536	-1.6599
mozavaptan	Vasopressin receptor antagonist	AVPR2|AVPR1A|AVPR1B	-0.5381	15.6536	-1.6598
PF-750	FAAH inhibitor	FAAH	-0.5374	15.6536	-1.6575
BMS-754807	IGF-1 inhibitor	IGF1R|AKT1	-0.5373	15.6536	-1.6573
valrubicin	DNA inhibitor|Topoisomerase inhibitor	TOP2A	-0.5372	15.6536	-1.6571
NVP-BHG712	Ephrin inhibitor	EPHB4	-0.5369	15.6536	-1.656
nandrolone	Imidazoline receptor agonist	NISCH|AR|CYP19A1|MAOA|MAOB	-0.535	15.6536	-1.6502
MEK-162	MEK inhibitor	MAP2K1|MAP2K2|IL1R2|IL6R|TNFRSF1A	-0.5349	15.6536	-1.6501
foretinib	VEGFR inhibitor	KDR|MET|AXL|FLT3|KIT|MST1R|TEK|FLT1|FLT4	-0.5349	15.6536	-1.65
DY-131	Estrogen receptor agonist	ESRRG|ESRRB|ESR2	-0.5349	15.6536	-1.65
aminopurvalanol-a	Tyrosine kinase inhibitor|CDK inhibitor	CDK2|CDK1|CDK5|CDK6	-0.5343	15.6536	-1.6482
PKI-179	MTOR inhibitor|PI3K inhibitor	MTOR	-0.5342	15.6536	-1.6477
rociletinib	EGFR inhibitor	EGFR	-0.5341	15.6536	-1.6475
bosutinib	Src inhibitor|Abl inhibitor|Bcr-Abl inhibitor	ABL1|SRC|BCR|LYN|CAMK2G|HCK|CAMK1D|CDK2|FRK|FYN|MAP2K1|MAP2K2|MAP3K2|MAP4K5|STK10|STK24|STK4|TNK2|TXK	-0.534	15.6536	-1.6472
BRD-K04546108	JAK inhibitor	JAK3	-0.534	15.6536	-1.6471
refametinib	MEK inhibitor	MAP2K1|MAP2K2	-0.5339	15.6536	-1.6469
BX-795	IKK inhibitor	PDPK1|IKBKE|TBK1|CDK2|CHEK1|GSK3B|KDR|PDK1	-0.5334	15.6536	-1.6454
GSK-269962	Rho associated kinase inhibitor	ROCK1|ROCK2	-0.5334	15.6536	-1.6453
noretynodrel	Progestogen hormone	PGR	-0.5333	15.6536	-1.6451
devazepide	CCK receptor antagonist	CCKAR	-0.5331	15.6536	-1.6445
PCI-24781	HDAC inhibitor	HDAC1|HDAC2|HDAC3|HDAC6|HDAC10|HDAC8	-0.5331	15.6536	-1.6445
thapsigargin	ATPase inhibitor	ATP2A1	-0.5331	15.6536	-1.6443
MLN-0128	MTOR inhibitor	MTOR|PIK3CA|PIK3CD|PIK3CG	-0.5329	15.6536	-1.6437
GW-405833	Cannabinoid receptor agonist	CNR2	-0.5323	15.6536	-1.642
taselisib	PI3K inhibitor	PIK3CA|PIK3CB|PIK3CD|PIK3CG	-0.5322	15.6536	-1.6417
methylene-blue	Nitric oxide production inhibitor|Guanylyl cyclase inhibitor|Monoamine oxidase inhibitor|Tau aggregation inhibitor	ACHE|MAPT	-0.5321	15.6536	-1.6414
AZD-4547	FGFR inhibitor	FGF2|FGFR1|FGFR2|FGFR3|FGFR4|IGF1R|KDR	-0.5319	15.6536	-1.6406
RG-7388	MDM inhibitor	MDM2|TP53	-0.5317	15.6536	-1.64
aminopurvalanol-a	Tyrosine kinase inhibitor|CDK inhibitor	CDK2|CDK1|CDK5|CDK6	-0.5314	15.6536	-1.6392
PF-04691502	MTOR inhibitor|PI3K inhibitor	MTOR|PIK3CA|PIK3CB|PIK3CD|PIK3CG	-0.5313	15.6536	-1.6389
PD-0325901	MEK inhibitor|MAP kinase inhibitor|Protein kinase inhibitor	MAP2K1|MAP2K2	-0.5304	15.6536	-1.6362
TAS-103	Topoisomerase inhibitor	TOP1|TOP2A	-0.5302	15.6536	-1.6354
NVP-BHG712	Ephrin inhibitor	EPHB4	-0.5299	15.6536	-1.6346
LY-2801653	MET inhibitor	MET|MST1R	-0.5297	15.6536	-1.634
triflupromazine	Dopamine receptor antagonist	DRD2|HTR2B|CHRNA7|CHRM1|CHRM2|DRD1	-0.5296	15.6536	-1.6336
sunitinib	FLT3 inhibitor|KIT inhibitor|PDGFR inhibitor|RET inhibitor|VEGFR inhibitor	PDGFRB|FLT1|FLT3|FLT4|KDR|KIT|PDGFRA|RET	-0.5296	15.6536	-1.6336
sunitinib	FLT3 inhibitor|KIT inhibitor|PDGFR inhibitor|RET inhibitor|VEGFR inhibitor	PDGFRB|FLT1|FLT3|FLT4|KDR|KIT|PDGFRA|RET	-0.5295	15.6536	-1.6333
sunitinib	FLT3 inhibitor|KIT inhibitor|PDGFR inhibitor|RET inhibitor|VEGFR inhibitor	PDGFRB|FLT1|FLT3|FLT4|KDR|KIT|PDGFRA|RET	-0.5293	15.6536	-1.6326
refametinib	MEK inhibitor	MAP2K1|MAP2K2	-0.5291	15.6536	-1.6321
alvespimycin	HSP inhibitor	HSP90AA1	-0.5291	15.6536	-1.6319
flucytosine	Antifungal	DNMT1	-0.5285	15.6536	-1.6301
AS-703026	MEK inhibitor	MAP2K1|MAP2K2	-0.5284	15.6536	-1.63
AZD-4547	FGFR inhibitor	FGF2|FGFR1|FGFR2|FGFR3|FGFR4|IGF1R|KDR	-0.5282	15.6536	-1.6293
selumetinib	MEK inhibitor	MAP2K1|MAP2K2	-0.5277	15.6536	-1.6277
MLN-0128	MTOR inhibitor	MTOR|PIK3CA|PIK3CD|PIK3CG	-0.5277	15.6536	-1.6277
roscovitine	CDK inhibitor	CDK2|CDK9|CDK7|CDK1|CDK5	-0.5273	15.6536	-1.6265
valrubicin	DNA inhibitor|Topoisomerase inhibitor	TOP2A	-0.5266	15.6536	-1.6245
IKK-16	IKK inhibitor	IKBKB	-0.5266	15.6536	-1.6243
ABT-737	BCL inhibitor	BCL2|BCL2L1|BCL2L2	-0.5265	15.6536	-1.624
KPT-185	Exportin antagonist	XPO1	-0.5265	15.6536	-1.6239
PF-05212384	MTOR inhibitor|PI3K inhibitor	MTOR|PIK3CA|PIK3CG	-0.5264	15.6536	-1.6238
AZD-7545	PDK inhibitor	PDK2|PDK1	-0.5264	15.6536	-1.6237
vorinostat	HDAC inhibitor	HDAC1|HDAC2|HDAC3|HDAC6|HDAC8|HDAC10|HDAC11|HDAC5|HDAC9	-0.5263	15.6536	-1.6233
sirolimus	MTOR inhibitor	MTOR|FKBP1A|CCR5|FGF2	-0.5261	15.6536	-1.6228
floxuridine	DNA synthesis inhibitor	TYMS	-0.526	15.6536	-1.6226
TAK-733	MEK inhibitor	MAP2K1	-0.5258	15.6536	-1.622
PF-04691502	MTOR inhibitor|PI3K inhibitor	MTOR|PIK3CA|PIK3CB|PIK3CD|PIK3CG	-0.5258	15.6536	-1.6217
PHA-793887	CDK inhibitor	CDK1|CDK2|CDK4|CDK5|CCND1|CCNE1|CDK7|CDK9	-0.5252	15.6536	-1.6201
lenvatinib	FGFR inhibitor|KIT inhibitor|PDGFR inhibitor|VEGFR inhibitor	KDR|FLT4|FGFR1|FLT1|KIT|FGFR2|FGFR3|FGFR4|PDGFB|PDGFRB|RET	-0.5238	15.6536	-1.6156
trametinib	MEK inhibitor	MAP2K1|MAP2K2|CYP2C8|CYP3A4	-0.5237	15.6536	-1.6155
dabrafenib	RAF inhibitor	BRAF|CYP2B6|CYP2C19|CYP2C8|CYP3A4|LIMK1|NEK11|RAF1|SIK1	-0.5237	15.6536	-1.6155
palbociclib	CDK inhibitor	CDK4|CDK6|CCND3	-0.5235	15.6536	-1.6148
sunitinib	FLT3 inhibitor|KIT inhibitor|PDGFR inhibitor|RET inhibitor|VEGFR inhibitor	PDGFRB|FLT1|FLT3|FLT4|KDR|KIT|PDGFRA|RET	-0.5232	15.6536	-1.6139
adenosine	Adenosine receptor agonist	ADORA1|ADORA2A|ADORA2B|ADORA3|PI4K2A|PI4K2B|TRPM4	-0.5232	15.6536	-1.6138
NU-7441	P-glycoprotein inhibitor|DNA dependent protein kinase inhibitor	PRKDC|ABCB1	-0.5232	15.6536	-1.6138
PF-573228	Focal adhesion kinase inhibitor	CDK1|CDK2|CDK7|GSK3B|IKBKB	-0.5232	15.6536	-1.6138
dinaciclib	CDK inhibitor	CDK1|CDK2|CDK9|CDK5|CCNT1	-0.5232	15.6536	-1.6138
BIBU-1361	EGFR inhibitor	EGFR	-0.5226	15.6536	-1.6121
thiostrepton	Protein synthesis inhibitor	FOXM1	-0.5224	15.6536	-1.6114
PD-184352	MEK inhibitor	MAP2K1|MAP2K2|MAP3K1|MAP3K2	-0.5223	15.6536	-1.6112
GSK-2334470	PDK inhibitor	PDPK1|AURKA|AURKB|PDK1	-0.5222	15.6536	-1.6107
avasimibe	ACAT inhibitor	ABCB1|SOAT1|CES1	-0.5222	15.6536	-1.6106
cladribine	Adenosine deaminase inhibitor|Ribonucleoside reductase inhibitor	ADA|PNP|POLA1|POLE|POLE2|POLE3|POLE4|RRM1|RRM2|RRM2B	-0.5221	15.6536	-1.6104
PP-242	MTOR inhibitor	MTOR|PASK	-0.5219	15.6536	-1.6097
purvalanol-a	CDK inhibitor|DYRK inhibitor	CDK1|CDK2|CDK4|CDK5|CCND1|CCNE1|CSNK1G3|RPS6KA1|SRC	-0.5214	15.6536	-1.6082
PD-407824	PKC inhibitor	WEE1	-0.5213	15.6536	-1.6081
TAK-733	MEK inhibitor	MAP2K1	-0.5208	15.6536	-1.6066
CYT-997	Tubulin inhibitor	TUBB	-0.5208	15.6536	-1.6065
PQ-401	IGF-1 inhibitor	IGF1R	-0.5208	15.6536	-1.6063
metoclopramide	Dopamine receptor antagonist|Serotonin receptor antagonist	DRD2|HTR4|HTR3A|CHRM1|HTR3B	-0.5205	15.6536	-1.6056
KIN001-055	EGFR inhibitor|JAK inhibitor|Leukotriene inhibitor|Mediator release inhibitor	JAK3	-0.5203	15.6536	-1.605
C-646	Histone acetyltransferase inhibitor	EP300	-0.5203	15.6536	-1.605
AZD-4547	FGFR inhibitor	FGF2|FGFR1|FGFR2|FGFR3|FGFR4|IGF1R|KDR	-0.5203	15.6536	-1.605
PFI-1	Bromodomain inhibitor	BRD4	-0.5203	15.6536	-1.6048
dioscin	Apoptosis stimulant	CXCR3	-0.52	15.6536	-1.604
R-547	CDK inhibitor	CDK2|CDK1|CDK4|CCND1|CCNE1|CDK7	-0.52	15.6536	-1.6038
PD-168393	EGFR inhibitor	EGFR|ERBB2|SRC	-0.5199	15.6536	-1.6037
nutlin-3	MDM inhibitor	MDM2|TP53	-0.5199	15.6536	-1.6036
YM-155	Survivin inhibitor	BIRC5	-0.5195	15.6536	-1.6025
diflunisal	Prostanoid receptor antagonist	PTGS2|PTGS1	-0.5194	15.6536	-1.602
primaquine	Antimalarial|DNA inhibitor	KRT7|NQO2	-0.5192	15.6536	-1.6015
PD-173074	FGFR inhibitor|VEGFR inhibitor	FGFR1|FGFR3|FGFR2|FGFR4|FLT1|FLT4|KDR|PDGFRA|PDGFRB	-0.5189	15.6536	-1.6006
CD-437	Retinoid receptor agonist	RARG	-0.5187	15.6536	-1.5999
ibrutinib	BTK inhibitor	BTK|BLK|BMX	-0.5183	15.6536	-1.5988
olmesartan-medoxomil	Angiotensin receptor antagonist	AGTR1	-0.5183	15.6536	-1.5988
fludarabine-phosphate	DNA inhibitor|DNA repair enzyme inhibitor|Purine antagonist	POLA1|RRM1|DCK|POLD1|POLE|RRM2|RRM2B	-0.5182	15.6536	-1.5984
flumatinib	Bcr-Abl inhibitor	ABL1|BCR|PDGFRB	-0.5181	15.6536	-1.5982
R-547	CDK inhibitor	CDK2|CDK1|CDK4|CCND1|CCNE1|CDK7	-0.518	15.6536	-1.5977
carfilzomib	Proteasome inhibitor	PSMB1|PSMB10|PSMB2|PSMB5|PSMB8|PSMB9|PSMA1|PSMA2|PSMA3|PSMA4|PSMA5|PSMA6|PSMA7|PSMA8|PSMB11|PSMB3|PSMB4|PSMB6|PSMB7	-0.5178	15.6536	-1.5971
L-168049	Glucagon receptor antagonist	GCGR	-0.5177	15.6536	-1.5969
aminopurvalanol-a	Tyrosine kinase inhibitor|CDK inhibitor	CDK2|CDK1|CDK5|CDK6	-0.5173	15.6536	-1.5958
PKI-179	MTOR inhibitor|PI3K inhibitor	MTOR	-0.5172	15.6536	-1.5955
vorinostat	HDAC inhibitor	HDAC1|HDAC2|HDAC3|HDAC6|HDAC8|HDAC10|HDAC11|HDAC5|HDAC9	-0.5169	15.6536	-1.5945
etoposide	Topoisomerase inhibitor	TOP2A|TOP2B|CYP2E1|CYP3A5	-0.5169	15.6536	-1.5945
PF-05212384	MTOR inhibitor|PI3K inhibitor	MTOR|PIK3CA|PIK3CG	-0.5169	15.6536	-1.5944
cyclosporin-a	Calcineurin inhibitor	PPIA|PPP3CA	-0.5168	15.6536	-1.5942
gossypol	BCL inhibitor|MCL1 inhibitor	BCL2|BCL2L1|MCL1|BCL2L2|CTGF|EGF	-0.5166	15.6536	-1.5934
gossypol	BCL inhibitor|MCL1 inhibitor	BCL2|BCL2L1|MCL1|BCL2L2|CTGF|EGF	-0.5165	15.6536	-1.5932
oligomycin-a	ATP synthase inhibitor|ATPase inhibitor	ATP5A1	-0.516	15.6536	-1.5916
dexniguldipine	Calmodulin inhibitor	CALM1|PRKCA|ADORA3	-0.5159	15.6536	-1.5914
AZD-8055	MTOR inhibitor	MTOR	-0.5157	15.6536	-1.5906
LGX-818	RAF inhibitor	BRAF	-0.5156	15.6536	-1.5903
KO-143	Breast cancer resistance protein inhibitor	ABCG2|ABCB1|ABCC1	-0.5155	15.6536	-1.5901
teniposide	Topoisomerase inhibitor	TOP2A|CYP3A5|TOP2B	-0.5154	15.6536	-1.5899
pralatrexate	Dihydrofolate reductase inhibitor	DHFR|SLC19A1|TYMS	-0.5154	15.6536	-1.5897
RS-17053	Adrenergic receptor antagonist	ADRA1A|ADRA1D	-0.5153	15.6536	-1.5895
resminostat	HDAC inhibitor	HDAC1|HDAC2|HDAC3|HDAC6|HDAC8	-0.5152	15.6536	-1.5893
trifluoperazine	Dopamine receptor antagonist	DRD2|ABCG2|CAMK2A|SCN4A|SCN9A|ADRA1A|CALM1|CALY|DRD4|HRH1|HTR2A|HTR2C|S100A4|TNNC1	-0.5152	15.6536	-1.5891
nutlin-3	MDM inhibitor	MDM2|TP53	-0.5152	15.6536	-1.5891
GSK-1070916	Aurora kinase inhibitor	AURKB|AURKC|AURKA|CYP2D6|CYP3A4	-0.5151	15.6536	-1.5889
XMD-1150	LRRK inhibitor	LRRK2	-0.515	15.6536	-1.5885
delanzomib	Proteasome inhibitor	CMA1|CTSG|CYP3A4|ELANE	-0.5144	15.6536	-1.5868
scoulerine	Adrenergic receptor antagonist|GABA receptor antagonist|Serotonin receptor antagonist	ADRA1D|ADRA2A|GABRA1	-0.514	15.6536	-1.5854
pyrvinium-pamoate	Androgen receptor antagonist|AKT inhibitor	AR	-0.5139	15.6536	-1.5852
CEP-37440	ALK inhibitor	ALK	-0.5137	15.6536	-1.5847
DG-041	Prostanoid receptor antagonist	PTGER3	-0.5134	15.6536	-1.5837
ceritinib	ALK inhibitor	ALK|FLT3|IGF1R|INSR|TSSK1B	-0.5134	15.6536	-1.5836
ingenol-mebutate	PKC activator	PRKCD|PRKCA|PRKCB|PRKCE|PRKCG	-0.5133	15.6536	-1.5834
daunorubicin	RNA synthesis inhibitor|Topoisomerase inhibitor	TOP2A|TOP2B	-0.5132	15.6536	-1.583
lapatinib	EGFR inhibitor|ERBB2 inhibitor	EGFR|ERBB2|CYP3A5	-0.513	15.6536	-1.5825
MLN-0128	MTOR inhibitor	MTOR|PIK3CA|PIK3CD|PIK3CG	-0.5128	15.6536	-1.5819
YM-155	Survivin inhibitor	BIRC5	-0.5125	15.6536	-1.581
dolastatin-10	Tubulin inhibitor|Immunostimulant	TUBB	-0.5123	15.6536	-1.5802
genz-644282	Topoisomerase inhibitor	TOP1	-0.5123	15.6536	-1.5802
AMG-232	MDM inhibitor	MDM2	-0.5123	15.6536	-1.5802
salermide	SIRT inhibitor	SIRT1|SIRT2	-0.5122	15.6536	-1.58
TAK-733	MEK inhibitor	MAP2K1	-0.5119	15.6536	-1.5789
PD-168393	EGFR inhibitor	EGFR|ERBB2|SRC	-0.5118	15.6536	-1.5788
TG-101348	JAK inhibitor|FLT3 inhibitor	JAK2|FLT3|RET|BRD4|JAK1|JAK3|TYK2	-0.5117	15.6536	-1.5784
NSC-3852	HDAC inhibitor	HDAC1	-0.5116	15.6536	-1.5781
amlodipine	Calcium channel blocker	CACNA1C|CACNA1D|CACNA1S|CACNA2D1|ABCG2|CA1|CACNA1B|CACNA1F|CACNA2D3|CACNB1|CACNB2|SMPD1	-0.5112	15.6536	-1.5768
UNC-0638	HMTase inhibitor	EHMT1|EHMT2	-0.5112	15.6536	-1.5768
purvalanol-a	CDK inhibitor|DYRK inhibitor	CDK1|CDK2|CDK4|CDK5|CCND1|CCNE1|CSNK1G3|RPS6KA1|SRC	-0.5109	15.6536	-1.5758
ZM-447439	Aurora kinase inhibitor	AURKA|AURKB	-0.5107	15.6536	-1.5753
diphenyleneiodonium	Nitric oxide synthase inhibitor	ALDH1A2|ALDH2|ALDH5A1|ALDH7A1|NOX3|XDH|NOS2|NOS3	-0.5105	15.6536	-1.5748
GW-405833	Cannabinoid receptor agonist	CNR2	-0.5104	15.6536	-1.5743
griseofulvin	Tubulin inhibitor	KRT12	-0.5094	15.6536	-1.5712
BML-259	CDK inhibitor	CDK2|CDK5	-0.5093	15.6536	-1.5708
AZD-2014	MTOR inhibitor	MTOR	-0.5092	15.6536	-1.5706
MEK-162	MEK inhibitor	MAP2K1|MAP2K2|IL1R2|IL6R|TNFRSF1A	-0.5089	15.6536	-1.5697
triamterene	Sodium channel inhibitor	SCNN1A|SCNN1B|SCNN1G|SCNN1D	-0.5089	15.6536	-1.5696
KPT-330	Exportin antagonist	XPO1	-0.5089	15.6536	-1.5696
anisomycin	DNA inhibitor	RPL10L|RPL11|RPL13A|RPL15|RPL19|RPL23|RPL23A|RPL26L1|RPL3|RPL37|RPL8|RSL24D1|SNU13	-0.5087	15.6536	-1.5692
triptolide	RNA polymerase inhibitor	CYP2C19|RELA	-0.5086	15.6536	-1.5689
ryuvidine	Histone lysine methyltransferase inhibitor	CDK4|CDK2	-0.5086	15.6536	-1.5688
PCI-29732	BTK inhibitor	BTK	-0.5083	15.6536	-1.5679
AZD-7762	CHK inhibitor	CHEK1|CHEK2	-0.5073	15.6536	-1.5647
niclosamide	DNA inhibitor|STAT inhibitor	STAT3	-0.5072	15.6536	-1.5645
tivozanib	VEGFR inhibitor	FLT1|FLT4|KDR|KIT|PDGFRA|PDGFRB	-0.5068	15.6536	-1.5633
AZD-9291	EGFR inhibitor	EGFR	-0.5066	15.6536	-1.5627
NVP-ADW742	IGF-1 inhibitor	IGF1R	-0.5066	15.6536	-1.5625
bazedoxifene	Selective estrogen receptor modulator (SERM)	ESR1|ESR2	-0.5066	15.6536	-1.5625
TAK-733	MEK inhibitor	MAP2K1	-0.5064	15.6536	-1.5621
LY-2603618	CHK inhibitor	CHEK1	-0.5063	15.6536	-1.5618
trametinib	MEK inhibitor	MAP2K1|MAP2K2|CYP2C8|CYP3A4	-0.506	15.6536	-1.5609
BRD-K04546108	JAK inhibitor	JAK3	-0.5061	15.6536	-1.5609
BX-795	IKK inhibitor	PDPK1|IKBKE|TBK1|CDK2|CHEK1|GSK3B|KDR|PDK1	-0.5059	15.6536	-1.5606
exemestane	Aromatase inhibitor	CYP19A1	-0.5057	15.6536	-1.5597
fludarabine	DNA inhibitor	ADA|RRM1|RRM2	-0.5055	15.6536	-1.5591
ENMD-2076	Aurora kinase inhibitor|FLT3 inhibitor|VEGFR inhibitor	AURKA|FLT3|KDR|PDGFRA|SRC|CSF1R|EPHA1|FGFR1|FGFR2|FGFR3|FLT4|KIT|PTK2	-0.5049	15.6536	-1.5574
lestaurtinib	FLT3 inhibitor|Growth factor receptor inhibitor|JAK inhibitor	FLT3|NTRK1|JAK2|NTRK2|NTRK3	-0.5049	15.6536	-1.5573
BVT-948	Tyrosine phosphatase inhibitor	PTPN1|PTPN11|PTPN2	-0.5047	15.6536	-1.5568
PHA-793887	CDK inhibitor	CDK1|CDK2|CDK4|CDK5|CCND1|CCNE1|CDK7|CDK9	-0.5043	15.6536	-1.5555
SN-38	Topoisomerase inhibitor	TOP1	-0.5042	15.6536	-1.5551
topotecan	Topoisomerase inhibitor	TOP1|TOP1MT	-0.5041	15.6536	-1.555
WAY-170523	Metalloproteinase inhibitor	MMP13	-0.504	15.6536	-1.5546
daunorubicin	RNA synthesis inhibitor|Topoisomerase inhibitor	TOP2A|TOP2B	-0.5039	15.6536	-1.5544
nutlin-3	MDM inhibitor	MDM2|TP53	-0.5039	15.6536	-1.5543
terfenadine	Histamine receptor antagonist	HRH1|KCNH2|CHRM1|CHRM2|CHRM3|CHRM4|CHRM5|KCNH1	-0.5036	15.6536	-1.5534
pacritinib	FLT3 inhibitor|JAK inhibitor	FLT3|JAK2|CDK2|JAK1|JAK3	-0.5033	15.6536	-1.5524
puromycin	Protein synthesis inhibitor	RPL10L|RPL11|RPL13A|RPL15|RPL19|RPL23|RPL23A|RPL26L1|RPL3|RPL37|RPL8|RSL24D1|SNU13	-0.503	15.6536	-1.5515
mepacrine	NFKB inhibitor|Cytokine production inhibitor|p53 activator	TP53|AKT1|MTOR|NFKB1|PLA2G2A|PLA2G2D|PLA2G1B|PLA2G4A|PLA2G6|PLCL1	-0.5029	15.6536	-1.5511
Ro-4987655	MEK inhibitor	MAP2K1	-0.5027	15.6536	-1.5506
ibrutinib	BTK inhibitor	BTK|BLK|BMX	-0.5027	15.6536	-1.5505
narciclasine	LIM kinase activator|Rho associated kinase activator	RHOA	-0.5026	15.6536	-1.5502
BGT-226	PI3K inhibitor	MTOR|PIK3CG|PIK3CA|PIK3CB	-0.5026	15.6536	-1.5501
voapaxar	Thrombin inhibitor	F2R	-0.5025	15.6536	-1.5499
TPCA-1	IKK inhibitor	IKBKB	-0.5023	15.6536	-1.5495
pyrvinium-pamoate	Androgen receptor antagonist|AKT inhibitor	AR	-0.5023	15.6536	-1.5494
lapatinib	EGFR inhibitor|ERBB2 inhibitor	EGFR|ERBB2|CYP3A5	-0.5019	15.6536	-1.5481
PD-0325901	MEK inhibitor|MAP kinase inhibitor|Protein kinase inhibitor	MAP2K1|MAP2K2	-0.5015	15.6536	-1.5469
topotecan	Topoisomerase inhibitor	TOP1|TOP1MT	-0.5014	15.6536	-1.5466
spironolactone	Mineralocorticoid receptor antagonist	NR3C2|KCNA5|KCND3|SCNN1A|AR|CACNA1A|CACNA1B|CACNA1C|CACNA1D|CACNA1F|CACNA1G|CACNA1H|CACNA1I|CACNA1S|CACNA2D1|CACNA2D2|CACNA2D3|CACNB1|CACNB2|CACNB3|CACNB4|CACNG1|CYP11B2|NR3C1|PGR|SHBG	-0.5014	15.6536	-1.5465
trametinib	MEK inhibitor	MAP2K1|MAP2K2|CYP2C8|CYP3A4	-0.5013	15.6536	-1.5464
BX-795	IKK inhibitor	PDPK1|IKBKE|TBK1|CDK2|CHEK1|GSK3B|KDR|PDK1	-0.5013	15.6536	-1.5463
topotecan	Topoisomerase inhibitor	TOP1|TOP1MT	-0.5013	15.6536	-1.5462
mitoxantrone	Topoisomerase inhibitor	TOP2A|PIM1	-0.5011	15.6536	-1.5456
scriptaid	HDAC inhibitor	HDAC1|HDAC2|HDAC3|HDAC4|HDAC5|HDAC6|HDAC7|HDAC8|HDAC9	-0.501	15.6536	-1.5453
AZD-8055	MTOR inhibitor	MTOR	-0.5007	15.6536	-1.5445
TG-101209	JAK inhibitor	JAK2|JAK3	-0.5006	15.6536	-1.5442
KHS-101	Neural stem cell inducer	TACC3	-0.5006	15.6536	-1.5441
ivermectin	GABA receptor agonist	CHRNA7|GABRB3|GLRA3|P2RX7	-0.5005	15.6536	-1.5438
triclosan	Enoyl-[acyl-carrier-protein] reductase [NADH] inhibitor	DNMT1	-0.5005	15.6536	-1.5438
GDC-0980	MTOR inhibitor|PI3K inhibitor	MTOR|PIK3CG|FGR|MAP3K9|PIK3CA|PIK3CB|PIK3CD|SYK	-0.5004	15.6536	-1.5436
BX-795	IKK inhibitor	PDPK1|IKBKE|TBK1|CDK2|CHEK1|GSK3B|KDR|PDK1	-0.5004	15.6536	-1.5436
tegafur	Thymidylate synthase inhibitor	TYMS	-0.5004	15.6536	-1.5436
torin-1	MTOR inhibitor|PI3K inhibitor	MTOR|PIK3CA	-0.5002	15.6536	-1.5427
BGT-226	PI3K inhibitor	MTOR|PIK3CG|PIK3CA|PIK3CB	-0.4999	15.6536	-1.5421
docetaxel	Tubulin inhibitor	TUBB|BCL2|MAP2|MAP4|MAPT|NR1I2|TUBB1	-0.4996	15.6536	-1.5411
ZSTK-474	PI3K inhibitor	PIK3CG|PIK3CA|PIK3CB|PIK3CD	-0.4996	15.6536	-1.5411
purvalanol-a	CDK inhibitor|DYRK inhibitor	CDK1|CDK2|CDK4|CDK5|CCND1|CCNE1|CSNK1G3|RPS6KA1|SRC	-0.4996	15.6536	-1.5409
HO-013	PPAR receptor agonist	PPARG	-0.4996	15.6536	-1.5409
CMPD-1	P38 MAPK inhibitor	GNRHR|MAPK14	-0.4995	15.6536	-1.5408
pyrvinium-pamoate	Androgen receptor antagonist|AKT inhibitor	AR	-0.4995	15.6536	-1.5407
ZG-10	JNK inhibitor	IRAK1	-0.4989	15.6536	-1.539
maprotiline	Norepinephrine inhibitor|Tricyclic antidepressant	SLC6A2|ADRA1A|ADRA1B|ADRA1D|ADRA2A|ADRA2B|ADRA2C|CHRM1|CHRM2|CHRM3|CHRM4|CHRM5|DRD2|HRH1|HTR2A|HTR2C|HTR7	-0.4989	15.6536	-1.5388
dabrafenib	RAF inhibitor	BRAF|CYP2B6|CYP2C19|CYP2C8|CYP3A4|LIMK1|NEK11|RAF1|SIK1	-0.4986	15.6536	-1.538
SCH-79797	Proteasome inhibitor	F2R	-0.4985	15.6536	-1.5376
pitavastatin	HMGCR inhibitor	HMGCR|APOA1|CYP2C8	-0.4983	15.6536	-1.537
AMG-232	MDM inhibitor	MDM2	-0.4983	15.6536	-1.5369
triclosan	Enoyl-[acyl-carrier-protein] reductase [NADH] inhibitor	DNMT1	-0.4978	15.6536	-1.5354
copanlisib	PI3K inhibitor	PIK3CA|PIK3CD|PIK3CB|PIK3CG	-0.4974	15.6536	-1.5341
HG-5-88-01	Protein kinase inhibitor	COQ8B|EGFR	-0.4972	15.6536	-1.5338
BMS-833923	Smoothened receptor antagonist	DHH|IHH|SMO	-0.4968	15.6536	-1.5323
BMS-754807	IGF-1 inhibitor	IGF1R|AKT1	-0.4967	15.6536	-1.532
oxyquinoline	Chelating agent	METAP2	-0.4966	15.6536	-1.5318
clomifene	Estrogen receptor antagonist	ESR1|AR	-0.4965	15.6536	-1.5315
oligomycin-c	ATP synthase inhibitor|ATPase inhibitor	ATP5A1	-0.4964	15.6536	-1.5312
LY-303511	Casein kinase inhibitor|PI3K inhibitor	CSNK2A1|CSNK2A2|CSNK2B|MTOR|BRD2|BRD3|BRD4	-0.4964	15.6536	-1.5311
cabozantinib	RET inhibitor|VEGFR inhibitor	KDR|MET|FLT3|KIT|RET|TEK|CYP2C19	-0.4961	15.6536	-1.5304
CAY-10594	Phospholipase inhibitor	PLD2	-0.4957	15.6536	-1.5289
SB-939	HDAC inhibitor	HDAC1|HDAC2|HDAC10|HDAC3|HDAC4|HDAC5|HDAC9	-0.4956	15.6536	-1.5288
aminopurvalanol-a	Tyrosine kinase inhibitor|CDK inhibitor	CDK2|CDK1|CDK5|CDK6	-0.4955	15.6536	-1.5284
tacedinaline	HDAC inhibitor	HDAC1	-0.4954	15.6536	-1.528
BAY-61-3606	Syk inhibitor	SYK	-0.4953	15.6536	-1.5279
PF-04691502	MTOR inhibitor|PI3K inhibitor	MTOR|PIK3CA|PIK3CB|PIK3CD|PIK3CG	-0.4953	15.6536	-1.5277
romidepsin	HDAC inhibitor	HDAC1|HDAC2|CYP2B6|CYP2C19|CYP3A5|HDAC3|HDAC4|HDAC5|HDAC6|HDAC7|HDAC8|HDAC9	-0.4951	15.6536	-1.5272
CD-437	Retinoid receptor agonist	RARG	-0.495	15.6536	-1.527
PRT-062070	JAK inhibitor|Syk inhibitor	SYK	-0.4948	15.6536	-1.5262
BX-912	PDK inhibitor	PDPK1|AKT2|CDK2|CHEK1|GSK3B|KDR|PDK1	-0.4947	15.6536	-1.526
rociletinib	EGFR inhibitor	EGFR	-0.4947	15.6536	-1.526
idarubicin	Topoisomerase inhibitor	TOP2A	-0.4947	15.6536	-1.526
raltitrexed	Thymidylate synthase inhibitor	TYMS|FPGS	-0.4947	15.6536	-1.5259
NVP-BHG712	Ephrin inhibitor	EPHB4	-0.4946	15.6536	-1.5255
hexachlorophene	Potassium channel activator	ENPP2|GLUD1|SDHD	-0.4943	15.6536	-1.5247
NNC-05-2090	GAT inhibitor|GABA uptake inhibitor	SLC6A11|SLC6A13|SLC6A12	-0.494	15.6536	-1.5239
WYE-125132	MTOR inhibitor	MTOR|PIK3CA	-0.494	15.6536	-1.5238
MK-1775	WEE1 kinase inhibitor	WEE1	-0.4937	15.6536	-1.523
neratinib	EGFR inhibitor	EGFR|ERBB2|ERBB4|KDR	-0.4937	15.6536	-1.5228
PHA-793887	CDK inhibitor	CDK1|CDK2|CDK4|CDK5|CCND1|CCNE1|CDK7|CDK9	-0.4937	15.6536	-1.5228
alisertib	Aurora kinase inhibitor	AURKA	-0.4934	15.6536	-1.5219
nutlin-3	MDM inhibitor	MDM2|TP53	-0.4933	15.6536	-1.5216
pyrvinium-pamoate	Androgen receptor antagonist|AKT inhibitor	AR	-0.4931	15.6536	-1.5209
UNC-1999	Histone lysine methyltransferase inhibitor	EZH2|EZH1	-0.4931	15.6536	-1.5208
cisapride	Serotonin receptor agonist	HTR4|KCNH2|CYP2B6|CYP2C8|CYP3A5|CYP3A7|HTR2A|HTR3A	-0.493	15.6536	-1.5207
lucitanib	FGFR inhibitor|VEGFR inhibitor	FGFR1|FLT1|KDR|FGFR2|FLT4|CSF1R|KIT|PDGFRA|PDGFRB|RET	-0.4928	15.6536	-1.5199
perhexiline	Carnitine palmitoyltransferase inhibitor	CPT1A|CPT2	-0.4926	15.6536	-1.5196
NSC-95397	CDC inhibitor	CASP3|CDC25A|CDC25B	-0.4926	15.6536	-1.5196
AZD-7762	CHK inhibitor	CHEK1|CHEK2	-0.4926	15.6536	-1.5194
vidarabine	Antiviral	ADCY5|ADA	-0.4925	15.6536	-1.5192
DY-131	Estrogen receptor agonist	ESRRG|ESRRB|ESR2	-0.4923	15.6536	-1.5185
SGC-CBP30	Bromodomain inhibitor	CREBBP|EP300	-0.4921	15.6536	-1.5181
sunitinib	FLT3 inhibitor|KIT inhibitor|PDGFR inhibitor|RET inhibitor|VEGFR inhibitor	PDGFRB|FLT1|FLT3|FLT4|KDR|KIT|PDGFRA|RET	-0.4921	15.6536	-1.518
triclabendazole	Tubulin inhibitor	DNMT1	-0.4921	15.6536	-1.518
bortezomib	NFKB inhibitor|Proteasome inhibitor	PSMB5|PSMB1|PSMB2|CASP3|CYP2C19|NFKB1|PSMA1|PSMA2|PSMA3|PSMA4|PSMA5|PSMA6|PSMA7|PSMA8|PSMB10|PSMB11|PSMB3|PSMB4|PSMB6|PSMB7|PSMB8|PSMB9|PSMD1|PSMD2|RELA	-0.4918	15.6536	-1.517
SNS-314	Aurora kinase inhibitor	AURKA|AURKB|AURKC	-0.4918	15.6536	-1.517
JTC-801	Opioid receptor antagonist	OPRL1	-0.4916	15.6536	-1.5165
refametinib	MEK inhibitor	MAP2K1|MAP2K2	-0.4912	15.6536	-1.5152
golvatinib	VEGFR inhibitor	MET|KDR	-0.4912	15.6536	-1.5152
CEP-32496	RAF inhibitor	BRAF|EGFR|RAF1	-0.491	15.6536	-1.5144
daunorubicin	RNA synthesis inhibitor|Topoisomerase inhibitor	TOP2A|TOP2B	-0.4909	15.6536	-1.5143
moclobemide	Monoamine oxidase inhibitor	MAOA|CYP2C19|MAOB	-0.4908	15.6536	-1.5139
NNC-55-0396	Calcium channel blocker	CATSPER1|CATSPER2|CATSPER3|CATSPER4	-0.4907	15.6536	-1.5137
BRD-K89997465	Dopamine receptor antagonist	DRD2|DRD3|DRD4|HTR2A|ADRA2A|ADRA2B|ADRA2C|DRD1|DRD5|HRH1|HTR1A|HTR2C|HTR6|HTR7|KIF11|ADRA1A|ADRA1B|ADRA1D|CALM1|CHRM1|CHRM3|HRH4|HTR2B|KCNH2|ORM1|ORM2|SMPD1|TRPC5	-0.4907	15.6536	-1.5135
tacrine	Acetylcholinesterase inhibitor	ACHE|BCHE	-0.4907	15.6536	-1.5135
XMD-885	MAP kinase inhibitor	MAPK7|LRRK2	-0.4906	15.6536	-1.5132
AG-879	Tyrosine kinase inhibitor|Angiogenesis inhibitor|VEGFR inhibitor	KDR|ERBB2|NTRK1	-0.4905	15.6536	-1.5129
palbociclib	CDK inhibitor	CDK4|CDK6|CCND3	-0.49	15.6536	-1.5115
WZ-4002	EGFR inhibitor	EGFR|ERBB2	-0.49	15.6536	-1.5115
BMS-387032	CDK inhibitor|Cell cycle inhibitor|MCL1 inhibitor	CDK2|CDK7|CDK9|MCL1	-0.4899	15.6536	-1.5111
IKK-16	IKK inhibitor	IKBKB	-0.4894	15.6536	-1.5095
T-98475	Gonadotropin receptor antagonist	GNRHR	-0.4894	15.6536	-1.5095
TG-101209	JAK inhibitor	JAK2|JAK3	-0.4891	15.6536	-1.5088
rotenone	Mitochondrial inhibitor	MT-ND1	-0.4891	15.6536	-1.5085
simeprevir	HCV inhibitor	CYP2C19|CYP2C8|SLCO1B3|CYP1A2|CYP3A4	-0.489	15.6536	-1.5084
gemcitabine	Ribonucleoside reductase inhibitor	RRM1|CMPK1|RRM2|TYMS	-0.4887	15.6536	-1.5074
sunitinib	FLT3 inhibitor|KIT inhibitor|PDGFR inhibitor|RET inhibitor|VEGFR inhibitor	PDGFRB|FLT1|FLT3|FLT4|KDR|KIT|PDGFRA|RET	-0.4887	15.6536	-1.5074
MK-1775	WEE1 kinase inhibitor	WEE1	-0.4886	15.6536	-1.5073
vorinostat	HDAC inhibitor	HDAC1|HDAC2|HDAC3|HDAC6|HDAC8|HDAC10|HDAC11|HDAC5|HDAC9	-0.4882	15.6536	-1.5059
PAC-1	Caspase activator	CASP3	-0.4879	15.6536	-1.5051
PHA-793887	CDK inhibitor	CDK1|CDK2|CDK4|CDK5|CCND1|CCNE1|CDK7|CDK9	-0.4878	15.6536	-1.5047
epirubicin	Topoisomerase inhibitor	TOP2A|CHD1	-0.4878	15.6536	-1.5046
KW-2449	Abl inhibitor|Aurora kinase inhibitor|FLT3 inhibitor	FLT3|ABL1|AURKA|FGFR1|AURKB	-0.4878	15.6536	-1.5045
PRT-062070	JAK inhibitor|Syk inhibitor	SYK	-0.4877	15.6536	-1.5043
aminopurvalanol-a	Tyrosine kinase inhibitor|CDK inhibitor	CDK2|CDK1|CDK5|CDK6	-0.4877	15.6536	-1.5043
cediranib	VEGFR inhibitor|KIT inhibitor	KDR|FLT1|FLT4|KIT|PDGFRB|CSF1R|FLT3|PDGFRA	-0.4876	15.6536	-1.5041
ellagic-acid	Glutathione transferase inhibitor|Aldose reductase inhibitor|Beta secretase inhibitor|HCV inhibitor|HIV inhibitor|Quorum sensing signaling modulator|Reverse transcriptase inhibitor	CA1|CA12|CA14|CA2|CA4|CA6|CA9|SYK|AKR1B1|BACE1|CA3|CA5A|CA5B|CA7|CSNK2A1|GSK3B|PRKACA|PRKCA|PRKCB|SQLE	-0.4876	15.6536	-1.5039
tioconazole	Sterol demethylase inhibitor	CYP51A1	-0.4875	15.6536	-1.5038
menadione	Mitochondrial inhibitor|Phosphatase inhibitor	PKM|AOX1|BGLAP|F10|F2|F7|F9|GGCX|NQO1|NQO2|PROC|PROS1|PROZ|VKORC1|VKORC1L1	-0.4875	15.6536	-1.5037
atrasentan	Endothelin receptor antagonist	EDNRA	-0.4875	15.6536	-1.5036
fenbendazole	Tubulin inhibitor	CYP2C19|CYP2D6|CYP2J2|CYP3A4|TUBB	-0.4874	15.6536	-1.5035
KIN001-127	ITK inhibitor	ITK	-0.4873	15.6536	-1.5032
indatraline	Norepinephrine inhibitor	SLC6A2|SLC6A3|SLC6A4|MAOA|MAOB	-0.4872	15.6536	-1.5029
AZD-7762	CHK inhibitor	CHEK1|CHEK2	-0.4872	15.6536	-1.5029
rifampicin	RNA polymerase inhibitor	NR1I2	-0.4871	15.6536	-1.5026
TG-101348	JAK inhibitor|FLT3 inhibitor	JAK2|FLT3|RET|BRD4|JAK1|JAK3|TYK2	-0.4868	15.6536	-1.5016
CEP-37440	ALK inhibitor	ALK	-0.4867	15.6536	-1.5014
resminostat	HDAC inhibitor	HDAC1|HDAC2|HDAC3|HDAC6|HDAC8	-0.4865	15.6536	-1.5006
razoxane	Chelating agent|Topoisomerase inhibitor	TOP2A|TOP2B	-0.4863	15.6536	-1.5001
nilotinib	Bcr-Abl inhibitor|Abl inhibitor	ABL1|KIT|BCR|CYP2B6|CYP2C8|DDR1|DDR2|PDGFRA	-0.4862	15.6536	-1.4996
tanespimycin	HSP inhibitor	HSP90AA1|CHEK1	-0.4861	15.6536	-1.4995
ZSTK-474	PI3K inhibitor	PIK3CG|PIK3CA|PIK3CB|PIK3CD	-0.4861	15.6536	-1.4995
diphenyleneiodonium	Nitric oxide synthase inhibitor	ALDH1A2|ALDH2|ALDH5A1|ALDH7A1|NOX3|XDH|NOS2|NOS3	-0.4858	15.6536	-1.4986
gefitinib	EGFR inhibitor	EGFR|CYP2C19	-0.4858	15.6536	-1.4983
genz-644282	Topoisomerase inhibitor	TOP1	-0.4854	15.6536	-1.4971
berbamine	Calmodulin inhibitor	CALM1	-0.4853	15.6536	-1.4969
pyrvinium-pamoate	Androgen receptor antagonist|AKT inhibitor	AR	-0.4852	15.6536	-1.4966
NNC-05-2090	GAT inhibitor|GABA uptake inhibitor	SLC6A11|SLC6A13|SLC6A12	-0.4851	15.6536	-1.4963
TAK-733	MEK inhibitor	MAP2K1	-0.4849	15.6536	-1.4958
TW-37	BCL inhibitor	BCL2|BCL2L1|MCL1	-0.4849	15.6536	-1.4958
AZ-20	ATR kinase inhibitor	ATR|MTOR	-0.4849	15.6536	-1.4958
TAS-103	Topoisomerase inhibitor	TOP1|TOP2A	-0.4848	15.6536	-1.4953
BRD-K73261812	Beta catenin inhibitor	CTNNB1	-0.4847	15.6536	-1.4952
aminopurvalanol-a	Tyrosine kinase inhibitor|CDK inhibitor	CDK2|CDK1|CDK5|CDK6	-0.4847	15.6536	-1.4951
AZD-2014	MTOR inhibitor	MTOR	-0.4846	15.6536	-1.4947
potassium-canrenoate	Mineralocorticoid receptor antagonist	NR3C2	-0.4846	15.6536	-1.4946
copanlisib	PI3K inhibitor	PIK3CA|PIK3CD|PIK3CB|PIK3CG	-0.4845	15.6536	-1.4944
JW-7-24-1	LCK Inhibitor	LCK	-0.4845	15.6536	-1.4943
BML-259	CDK inhibitor	CDK2|CDK5	-0.4843	15.6536	-1.494
NNC-55-0396	Calcium channel blocker	CATSPER1|CATSPER2|CATSPER3|CATSPER4	-0.4843	15.6536	-1.4937
bortezomib	NFKB inhibitor|Proteasome inhibitor	PSMB5|PSMB1|PSMB2|CASP3|CYP2C19|NFKB1|PSMA1|PSMA2|PSMA3|PSMA4|PSMA5|PSMA6|PSMA7|PSMA8|PSMB10|PSMB11|PSMB3|PSMB4|PSMB6|PSMB7|PSMB8|PSMB9|PSMD1|PSMD2|RELA	-0.4842	15.6536	-1.4936
perphenazine	Dopamine receptor antagonist	DRD2|CALM1|DRD1|HRH1|HTR2A|HTR2C|HTR6|HTR7	-0.4842	15.6536	-1.4935
NSC-697923	Ubiquitin-conjugating enzyme inhibitor	UBE2N	-0.4842	15.6536	-1.4935
T-98475	Gonadotropin receptor antagonist	GNRHR	-0.4842	15.6536	-1.4934
wortmannin	PI3K inhibitor	PLK1|PIK3CA|PIK3CG|ATM|ATR|MTOR|PLK3|PI4KA|PI4KB|PIK3CD|PIK3R1|PRKDC	-0.484	15.6536	-1.493
farnesol	FXR agonist|Monoamine oxidase inhibitor|NFKB activator|PPAR receptor agonist	MAOB	-0.484	15.6536	-1.4928
taselisib	PI3K inhibitor	PIK3CA|PIK3CB|PIK3CD|PIK3CG	-0.4839	15.6536	-1.4925
BIBU-1361	EGFR inhibitor	EGFR	-0.4838	15.6536	-1.4923
mocetinostat	HDAC inhibitor	HDAC1|HDAC2|HDAC3|HDAC11	-0.4838	15.6536	-1.4922
NSC-663284	CDC inhibitor	CDC25A|CDC25B|CDC25C	-0.4837	15.6536	-1.4919
sunitinib	FLT3 inhibitor|KIT inhibitor|PDGFR inhibitor|RET inhibitor|VEGFR inhibitor	PDGFRB|FLT1|FLT3|FLT4|KDR|KIT|PDGFRA|RET	-0.4836	15.6536	-1.4916
LY-2603618	CHK inhibitor	CHEK1	-0.4834	15.6536	-1.4911
cabozantinib	RET inhibitor|VEGFR inhibitor	KDR|MET|FLT3|KIT|RET|TEK|CYP2C19	-0.4834	15.6536	-1.4911
KPT-330	Exportin antagonist	XPO1	-0.4833	15.6536	-1.4907
puromycin	Protein synthesis inhibitor	RPL10L|RPL11|RPL13A|RPL15|RPL19|RPL23|RPL23A|RPL26L1|RPL3|RPL37|RPL8|RSL24D1|SNU13	-0.4832	15.6536	-1.4904
BRD-K04546108	JAK inhibitor	JAK3	-0.4832	15.6536	-1.4904
AVL-292	BTK inhibitor	BTK|EGFR|ITK|JAK3|YES1	-0.4832	15.6536	-1.4903
WYE-354	MTOR inhibitor	MTOR	-0.483	15.6536	-1.4899
bazedoxifene	Selective estrogen receptor modulator (SERM)	ESR1|ESR2	-0.483	15.6536	-1.4899
NSC-3852	HDAC inhibitor	HDAC1	-0.483	15.6536	-1.4897
belinostat	HDAC inhibitor	HDAC1|HDAC2|HDAC3|HDAC4|HDAC5|HDAC6|HDAC7|HDAC8|HDAC9|HDAC10|HDAC11	-0.4829	15.6536	-1.4896
quiflapon	Leukotriene inhibitor	ALOX5AP|ALOX5	-0.4829	15.6536	-1.4894
carmofur	Thymidylate synthase inhibitor	TYMS	-0.4828	15.6536	-1.4893
sirolimus	MTOR inhibitor	MTOR|FKBP1A|CCR5|FGF2	-0.4826	15.6536	-1.4886
thapsigargin	ATPase inhibitor	ATP2A1	-0.4823	15.6536	-1.4875
alvocidib	CDK inhibitor	CDK2|CDK4|CDK1|CDK6|CDK7|CDK9|CDK5|CDK8|EGFR|PYGM|BCL2|BIRC5|CCNT1|MCL1|XIAP	-0.4821	15.6536	-1.4872
palbociclib	CDK inhibitor	CDK4|CDK6|CCND3	-0.4821	15.6536	-1.487
GDC-0879	RAF inhibitor	BRAF	-0.4818	15.6536	-1.4861
GDC-0199	BCL inhibitor	BCL2	-0.4817	15.6536	-1.4859
AZD-5438	CDK inhibitor	CCNB1|CCNE1|CDK1|CDK2|KCNH2	-0.4817	15.6536	-1.4858
amiodarone	Potassium channel antagonist	KCNH2|CHRM3|CYP2C8|SCN5A|ADRB1|CACNA1H|CACNA2D2|KCNA7	-0.4816	15.6536	-1.4856
mercaptopurine	Immunosuppressant|Protein synthesis inhibitor|Purine antagonist	HPRT1|IMPDH1|IMPDH2|PPAT	-0.4814	15.6536	-1.485
PHA-665752	MET inhibitor	MET	-0.4813	15.6536	-1.4847
GDC-0941	PI3K inhibitor	PIK3CG|PIK3CA|PIK3CB|PIK3CD	-0.4811	15.6536	-1.4841
BGT-226	PI3K inhibitor	MTOR|PIK3CG|PIK3CA|PIK3CB	-0.481	15.6536	-1.4837
PLX-4720	RAF inhibitor	BRAF|KDR	-0.4807	15.6536	-1.4827
BRD-K49657628	EGFR inhibitor|Tyrosine kinase inhibitor	EGFR	-0.4806	15.6536	-1.4825
mibefradil	Calcium channel blocker	CACNA1H|CACNA1G|CACNA1C|CACNA1I|SCN2A|SCN4A|SCN5A|SCN9A|ANO1|CACNA1D|CACNA1F|CACNA1S|CACNB1|CACNB2|CACNB3|CACNB4|CATSPER1|CATSPER2|CATSPER3|CATSPER4	-0.4806	15.6536	-1.4824
pyrimethamine	Dihydrofolate reductase inhibitor	DHFRP1|HEXA|STAT3|DHFR|SLC47A1	-0.4804	15.6536	-1.4818
I-BRD9	Bromodomain inhibitor	BRD9	-0.4803	15.6536	-1.4815
rifabutin	Bacterial protein synthesis inhibitor	CYP3A4|HSP90AA1|HSP90B1	-0.4802	15.6536	-1.4812
nutlin-3	MDM inhibitor	MDM2|TP53	-0.4801	15.6536	-1.4809
doxorubicin	Topoisomerase inhibitor	TOP2A	-0.4801	15.6536	-1.4808
mercaptopurine	Immunosuppressant|Protein synthesis inhibitor|Purine antagonist	HPRT1|IMPDH1|IMPDH2|PPAT	-0.4797	15.6536	-1.4796
SB-2343	MTOR inhibitor|PI3K inhibitor	MTOR|PIK3CA|PIK3CB|PIK3CD|PIK3CG	-0.4796	15.6536	-1.4793
MEK-162	MEK inhibitor	MAP2K1|MAP2K2|IL1R2|IL6R|TNFRSF1A	-0.4796	15.6536	-1.4793
albendazole	Tubulin inhibitor	CYP1A2|CYP2J2|TUBA1A|TUBB|TUBB4B	-0.4795	15.6536	-1.479
cladribine	Adenosine deaminase inhibitor|Ribonucleoside reductase inhibitor	ADA|PNP|POLA1|POLE|POLE2|POLE3|POLE4|RRM1|RRM2|RRM2B	-0.4795	15.6536	-1.479
MK-3207	Calcitonin antagonist	CALCA|CALCRL|RAMP1	-0.4795	15.6536	-1.479
AZD-7762	CHK inhibitor	CHEK1|CHEK2	-0.4795	15.6536	-1.4789
balsalazide	Cyclooxygenase inhibitor	PTGS1|PTGS2|ALOX5|PPARG	-0.4794	15.6536	-1.4788
panobinostat	HDAC inhibitor	HDAC1|HDAC2|HDAC3|HDAC4|HDAC6|HDAC7|HDAC8|HDAC9	-0.4789	15.6536	-1.4771
NNC-05-2090	GAT inhibitor|GABA uptake inhibitor	SLC6A11|SLC6A13|SLC6A12	-0.4789	15.6536	-1.4771
clofarabine	Ribonucleoside reductase inhibitor	RRM1|POLA1|RRM2|SLC22A8|POLD1|POLE|RRM2B	-0.4787	15.6536	-1.4766
DL-PDMP	Glucosyltransferase inhibitor	UGCG|ASAH1	-0.4787	15.6536	-1.4765
XMD-1150	LRRK inhibitor	LRRK2	-0.4785	15.6536	-1.476
nTZDpa	PPAR receptor agonist	PPARG	-0.4783	15.6536	-1.4754
BRD-K41708980	Immunosuppressant|Corticosteroid agonist|Glucocorticoid receptor agonist	NR3C1|CYP3A5|CYP3A7	-0.4782	15.6536	-1.475
aminopurvalanol-a	Tyrosine kinase inhibitor|CDK inhibitor	CDK2|CDK1|CDK5|CDK6	-0.4782	15.6536	-1.4749
ZM-336372	RAF inhibitor	BRAF|LCK|MAPK14|RAF1	-0.478	15.6536	-1.4744
PD-173074	FGFR inhibitor|VEGFR inhibitor	FGFR1|FGFR3|FGFR2|FGFR4|FLT1|FLT4|KDR|PDGFRA|PDGFRB	-0.478	15.6536	-1.4744
PF-431396	Focal adhesion kinase inhibitor	PTK2|PTK2B	-0.478	15.6536	-1.4743
vandetanib	EGFR inhibitor|RET tyrosine kinase inhibitor|VEGFR inhibitor	EGFR|KDR|RET|FLT1|FLT4|PTK6|TEK|FLT3|KIT|EPHA1|EPHA10|EPHA2|EPHA3|EPHA4|EPHA5|EPHA6|EPHA7|EPHA8|EPHB1|EPHB2|EPHB3|EPHB4|EPHB6|ERBB2|ERBB3|ERBB4|SRC|VEGFA	-0.4779	15.6536	-1.4741
AZ-20	ATR kinase inhibitor	ATR|MTOR	-0.4779	15.6536	-1.474
regorafenib	FGFR inhibitor|KIT inhibitor|PDGFR inhibitor|RAF inhibitor|RET inhibitor|VEGFR inhibitor	KDR|KIT|RET|FLT1|FLT4|PDGFRA|TEK|BRAF|ABL1|DDR2|FGFR1|FGFR2|FRK|MAPK11|PDGFRB|RAF1|CYP2B6|CYP2C19|CYP2C8|FGF2|EPHA2|NTRK1	-0.4774	15.6536	-1.4727
mepacrine	NFKB inhibitor|Cytokine production inhibitor|p53 activator	TP53|AKT1|MTOR|NFKB1|PLA2G2A|PLA2G2D|PLA2G1B|PLA2G4A|PLA2G6|PLCL1	-0.4774	15.6536	-1.4727
mycophenolate-mofetil	Inosine monophosphate dehydrogenase inhibitor|Dehydrogenase inhibitor|Hydroxycarboxylic acid receptor agonist|Immunosuppressant|Inositol monophosphatase inhibitor	IMPDH1|IMPDH2|HCAR2	-0.4772	15.6536	-1.4721
rociletinib	EGFR inhibitor	EGFR	-0.4772	15.6536	-1.4719
PF-03814735	Aurora kinase inhibitor	AURKA|AURKB	-0.477	15.6536	-1.4712
cyproheptadine	Histamine receptor antagonist	HRH1|HTR2B|ADRA1A|ADRA1B|ADRA1D|CHRM1|CHRM2|CHRM3|HTR2A|HTR2C|HTR6|HTR7	-0.4768	15.6536	-1.4707
irinotecan	Topoisomerase inhibitor	TOP1|CYP3A5|TOP1MT	-0.4765	15.6536	-1.4697
talazoparib	PARP inhibitor	PARP2|PARP1	-0.4765	15.6536	-1.4696
pralatrexate	Dihydrofolate reductase inhibitor	DHFR|SLC19A1|TYMS	-0.4763	15.6536	-1.4692
BRD-A49680073	JAK inhibitor|Lipocortin synthesis stimulant|STAT inhibitor	JAK2|STAT3	-0.4763	15.6536	-1.4691
maprotiline	Norepinephrine reuptake inhibitor|Tricyclic antidepressant	SLC6A2|ADRA1A|ADRA1B|ADRA1D|ADRA2A|ADRA2B|ADRA2C|CHRM1|CHRM2|CHRM3|CHRM4|CHRM5|DRD2|HRH1|HTR2A|HTR2C|HTR7	-0.4763	15.6536	-1.4691
ixazomib	Proteasome inhibitor	PSMB1	-0.4763	15.6536	-1.4691
ZM-447439	Aurora kinase inhibitor	AURKA|AURKB	-0.4762	15.6536	-1.4688
BML-259	CDK inhibitor	CDK2|CDK5	-0.4759	15.6536	-1.4681
CGK-733	ATM kinase inhibitor|ATR kinase inhibitor	ATM|ATR	-0.4758	15.6536	-1.4677
etidronic-acid	Bone resorption inhibitor	PTPRS|FDPS|ATP6V1A	-0.4758	15.6536	-1.4677
WZ-4002	EGFR inhibitor	EGFR|ERBB2	-0.4758	15.6536	-1.4676
etoposide	Topoisomerase inhibitor	TOP2A|TOP2B|CYP2E1|CYP3A5	-0.4757	15.6536	-1.4675
PCI-24781	HDAC inhibitor	HDAC1|HDAC2|HDAC3|HDAC6|HDAC10|HDAC8	-0.4757	15.6536	-1.4672
BRD-K04546108	JAK inhibitor	JAK3	-0.4755	15.6536	-1.4667
valrubicin	DNA inhibitor|Topoisomerase inhibitor	TOP2A	-0.4755	15.6536	-1.4666
nutlin-3	MDM inhibitor	MDM2|TP53	-0.4754	15.6536	-1.4665
NU-7441	P-glycoprotein inhibitor|DNA dependent protein kinase inhibitor	PRKDC|ABCB1	-0.4753	15.6536	-1.4659
R-428	AXL kinase inhibitor	AXL	-0.4752	15.6536	-1.4657
PHA-665752	MET inhibitor	MET	-0.4751	15.6536	-1.4656
BX-795	IKK inhibitor	PDPK1|IKBKE|TBK1|CDK2|CHEK1|GSK3B|KDR|PDK1	-0.4749	15.6536	-1.4649
PHA-665752	MET inhibitor	MET	-0.4747	15.6536	-1.4642
taselisib	PI3K inhibitor	PIK3CA|PIK3CB|PIK3CD|PIK3CG	-0.4746	15.6536	-1.4641
crizotinib	ALK inhibitor	ALK|MET|CYP2B6|CYP3A5|MST1R|ROS1	-0.4745	15.6536	-1.4636
selumetinib	MEK inhibitor	MAP2K1|MAP2K2	-0.4744	15.6536	-1.4634
phenolphthalein	Indicator dye	UGT1A9	-0.4743	15.6536	-1.4629
WT-171	HDAC inhibitor	HDAC6	-0.4743	15.6536	-1.4629
DL-PDMP	Glucosyltransferase inhibitor	UGCG|ASAH1	-0.4742	15.6536	-1.4627
MEK-162	MEK inhibitor	MAP2K1|MAP2K2|IL1R2|IL6R|TNFRSF1A	-0.4741	15.6536	-1.4623
midostaurin	FLT3 inhibitor|KIT inhibitor|PKC inhibitor	FLT3|KIT|CCNB1|FLT1|KDR|PDGFRB|PRKCA|VEGFA|PRKCG	-0.4741	15.6536	-1.4623
Ro-08-2750	NGF binding inhibitor	NGFR|NGF	-0.4741	15.6536	-1.4623
panobinostat	HDAC inhibitor	HDAC1|HDAC2|HDAC3|HDAC4|HDAC6|HDAC7|HDAC8|HDAC9	-0.474	15.6536	-1.4622
WH-4023	Src inhibitor	LCK|SRC|ABL1	-0.474	15.6536	-1.462
TC-H-106	HDAC inhibitor	HDAC1|HDAC2|HDAC3|HDAC8	-0.4738	15.6536	-1.4614
cediranib	VEGFR inhibitor|KIT inhibitor	KDR|FLT1|FLT4|KIT|PDGFRB|CSF1R|FLT3|PDGFRA	-0.4738	15.6536	-1.4614
WYE-125132	MTOR inhibitor	MTOR|PIK3CA	-0.4735	15.6536	-1.4607
IPI-145	PI3K inhibitor	PIK3CD|PIK3CG|PIK3CA|PIK3CB	-0.4736	15.6536	-1.4607
LGX-818	RAF inhibitor	BRAF	-0.4734	15.6536	-1.4602
vorinostat	HDAC inhibitor	HDAC1|HDAC2|HDAC3|HDAC6|HDAC8|HDAC10|HDAC11|HDAC5|HDAC9	-0.4732	15.6536	-1.4597
KU-0063794	MTOR inhibitor	MTOR	-0.4731	15.6536	-1.4593
paclitaxel	Tubulin inhibitor	TUBB|NR1I2|ABCB1|CYP2C8|BCL2|MAP2|MAP4|MAPT|TLR4|TUBB1	-0.4731	15.6536	-1.4592
CD-437	Retinoid receptor agonist	RARG	-0.473	15.6536	-1.4591
LGX-818	RAF inhibitor	BRAF	-0.4729	15.6536	-1.4588
etoposide	Topoisomerase inhibitor	TOP2A|TOP2B|CYP2E1|CYP3A5	-0.4729	15.6536	-1.4588
lylamine	Cannabinoid receptor agonist	CNR1	-0.4729	15.6536	-1.4586
QL-XI-92	DDR1 inhibitor	DDR1	-0.4728	15.6536	-1.4584
ganetespib	HSP inhibitor	HSP90AA1|WT1	-0.4727	15.6536	-1.458
AZD-9291	EGFR inhibitor	EGFR	-0.4726	15.6536	-1.4577
NVP-TAE226	Protein tyrosine kinase inhibitor	IGF1R|PTK2	-0.4725	15.6536	-1.4573
camptothecin	Topoisomerase inhibitor	TOP1|HIF1A	-0.4719	15.6536	-1.4557
linsitinib	IGF-1 inhibitor	IGF1R|INSR|INSRR	-0.4717	15.6536	-1.455
PP-1	Src inhibitor|Abl inhibitor	SRC|HCK|RET	-0.4715	15.6536	-1.4544
PAC-1	Caspase activator	CASP3	-0.4715	15.6536	-1.4544
PRT-062607	Syk inhibitor	SYK|FGR|MAP3K9	-0.4715	15.6536	-1.4543
alpelisib	PI3K inhibitor	PIK3CA|PIK3CB|PIK3CD|PIK3CG	-0.4714	15.6536	-1.454
fludarabine	DNA inhibitor	ADA|RRM1|RRM2	-0.4712	15.6536	-1.4536
AZD-3463	ALK inhibitor|IGF-1 inhibitor	ALK|IGF1R	-0.4712	15.6536	-1.4533
BRD-K76674262	Protein synthesis inhibitor	RPL3	-0.4712	15.6536	-1.4533
ISOX	HDAC inhibitor	HDAC6	-0.4711	15.6536	-1.4531
T-98475	Gonadotropin receptor antagonist	GNRHR	-0.4707	15.6536	-1.452
BX-912	PDK inhibitor	PDPK1|AKT2|CDK2|CHEK1|GSK3B|KDR|PDK1	-0.4706	15.6536	-1.4517
pyrvinium-pamoate	Androgen receptor antagonist|AKT inhibitor	AR	-0.4706	15.6536	-1.4515
adarotene	Retinoid receptor agonist	RARG|RARA|RARB	-0.4706	15.6536	-1.4515
acivicin	Gamma glutamyltransferase Inhibitors	CAD|GGT1|CTPS1	-0.4702	15.6536	-1.4505
AS-703026	MEK inhibitor	MAP2K1|MAP2K2	-0.4699	15.6536	-1.4493
ponatinib	Bcr-Abl inhibitor|FLT3 inhibitor|PDGFR inhibitor	ABL1|BCR|FLT3|RET|FGFR1|FGFR2|FGFR3|FGFR4|KIT|TEK|CYP2C8|CYP3A5|FGF2|FLT1|KDR|LCK|LYN|PDGFRA|SRC	-0.4698	15.6536	-1.4491
SB-2343	MTOR inhibitor|PI3K inhibitor	MTOR|PIK3CA|PIK3CB|PIK3CD|PIK3CG	-0.4697	15.6536	-1.4489
mycophenolate-mofetil	Inosine monophosphate dehydrogenase inhibitor|Dehydrogenase inhibitor|Hydroxycarboxylic acid receptor agonist|Immunosuppressant|Inositol monophosphatase inhibitor	IMPDH1|IMPDH2|HCAR2	-0.4697	15.6536	-1.4489
tioconazole	Sterol demethylase inhibitor	CYP51A1	-0.4696	15.6536	-1.4484
AS-703026	MEK inhibitor	MAP2K1|MAP2K2	-0.4695	15.6536	-1.4482
ivermectin	GABA receptor agonist	CHRNA7|GABRB3|GLRA3|P2RX7	-0.4693	15.6536	-1.4475
I-BET-762	Bromodomain inhibitor	BRD2|BRD3|BRD4|APOA1	-0.4693	15.6536	-1.4475
fluspirilene	Dopamine receptor antagonist	DRD2|HTR2A|CACNG1|HRH1|HTR1A|HTR1D|HTR1E	-0.4692	15.6536	-1.4474
prostaglandin	Prostanoid receptor antagonist	PTGDR2|PTGDR	-0.4692	15.6536	-1.4472
dabrafenib	RAF inhibitor	BRAF|CYP2B6|CYP2C19|CYP2C8|CYP3A4|LIMK1|NEK11|RAF1|SIK1	-0.469	15.6536	-1.4466
PF-04691502	MTOR inhibitor|PI3K inhibitor	MTOR|PIK3CA|PIK3CB|PIK3CD|PIK3CG	-0.4689	15.6536	-1.4463
ganetespib	HSP inhibitor	HSP90AA1|WT1	-0.4687	15.6536	-1.4457
CGK-733	ATM kinase inhibitor|ATR kinase inhibitor	ATM|ATR	-0.4684	15.6536	-1.4449
BML-259	CDK inhibitor	CDK2|CDK5	-0.4684	15.6536	-1.4448
andarine	Androgen receptor antagonist	AR	-0.4684	15.6536	-1.4447
ceritinib	ALK inhibitor	ALK|FLT3|IGF1R|INSR|TSSK1B	-0.4683	15.6536	-1.4446
PHA-793887	CDK inhibitor	CDK1|CDK2|CDK4|CDK5|CCND1|CCNE1|CDK7|CDK9	-0.4683	15.6536	-1.4444
BRD-K04546108	JAK inhibitor	JAK3	-0.4682	15.6536	-1.4443
EMD-1214063	HGF receptor inhibitor	MET	-0.4682	15.6536	-1.4441
CEP-37440	ALK inhibitor	ALK	-0.4681	15.6536	-1.444
SGI-1776	PIM inhibitor	PIM1|FLT3|PIM2|PIM3	-0.468	15.6536	-1.4436
belinostat	HDAC inhibitor	HDAC1|HDAC2|HDAC3|HDAC4|HDAC5|HDAC6|HDAC7|HDAC8|HDAC9|HDAC10|HDAC11	-0.4677	15.6536	-1.4426
purvalanol-a	CDK inhibitor|DYRK inhibitor	CDK1|CDK2|CDK4|CDK5|CCND1|CCNE1|CSNK1G3|RPS6KA1|SRC	-0.4677	15.6536	-1.4426
dovitinib	EGFR inhibitor|FGFR inhibitor|FLT3 inhibitor|PDGFR inhibitor|VEGFR inhibitor	FGFR1|FLT1|KDR|EGFR|FGFR3|FLT3|FLT4|KIT|PDGFRB|CSF1R|FGFR2|INSR|PDGFRA	-0.4676	15.6536	-1.4425
aminoglutethimide	Glucocorticoid receptor antagonist	CYP19A1|CYP11A1|NR3C1	-0.4676	15.6536	-1.4424
tacedinaline	HDAC inhibitor	HDAC1	-0.4676	15.6536	-1.4424
golvatinib	VEGFR inhibitor	MET|KDR	-0.4675	15.6536	-1.4421
ingenol-mebutate	PKC activator	PRKCD|PRKCA|PRKCB|PRKCE|PRKCG	-0.4674	15.6536	-1.4418
dexniguldipine	Calmodulin inhibitor	CALM1|PRKCA|ADORA3	-0.4674	15.6536	-1.4418
STA-5326	Interleukin inhibitor	IL12A|IL12B|IL12RB1|IL12RB2|IL23A	-0.4672	15.6536	-1.4412
zileuton	Leukotriene inhibitor|Lipoxygenase inhibitor	ALOX5	-0.4672	15.6536	-1.441
NCH-51	HDAC inhibitor	HDAC1|HDAC10|HDAC11|HDAC2|HDAC3|HDAC4|HDAC5|HDAC6|HDAC7|HDAC8|HDAC9	-0.4671	15.6536	-1.4408
pioglitazone	PPAR receptor agonist|Insulin sensitizer	PPARG|INS|TRPM3	-0.467	15.6536	-1.4405
medrysone	Glucocorticoid receptor agonist	NR3C1	-0.4669	15.6536	-1.4402
OTX-015	Bromodomain inhibitor	BRD2|BRD3|BRD4|SELE|VCAM1	-0.4668	15.6536	-1.44
NVP-TAE684	ALK inhibitor	ALK|INSR	-0.4668	15.6536	-1.4398
thioguanine	Purine antagonist	IMPDH1|IMPDH2	-0.4668	15.6536	-1.4398
R-547	CDK inhibitor	CDK2|CDK1|CDK4|CCND1|CCNE1|CDK7	-0.4667	15.6536	-1.4396
importazole	Importin inhibitor	KPNB1	-0.4665	15.6536	-1.439
miglitol	Glucosidase inhibitor	GAA|MGAM|SLC5A4|GANAB|GANC	-0.4664	15.6536	-1.4386
milnacipran	Serotonin receptor antagonist	SLC6A2|SLC6A4|GRIN1|GRIN2A|GRIN2B|GRIN2C|GRIN2D|GRIN3A|GRIN3B	-0.4664	15.6536	-1.4385
wortmannin	PI3K inhibitor	PLK1|PIK3CA|PIK3CG|ATM|ATR|MTOR|PLK3|PI4KA|PI4KB|PIK3CD|PIK3R1|PRKDC	-0.4663	15.6536	-1.4382
cabazitaxel	Tubulin inhibitor	CYP2C8|CYP3A5|SLCO1B3|TUBA4A|TUBB|TUBB1	-0.4662	15.6536	-1.438
MEK-162	MEK inhibitor	MAP2K1|MAP2K2|IL1R2|IL6R|TNFRSF1A	-0.4662	15.6536	-1.438
Ro-4987655	MEK inhibitor	MAP2K1	-0.466	15.6536	-1.4374
roxatidine	Histamine receptor antagonist	HRH2	-0.466	15.6536	-1.4373
proscillaridin	Na/K-ATPase inhibitor	ATP1A1	-0.4658	15.6536	-1.4367
perhexiline	Carnitine palmitoyltransferase inhibitor	CPT1A|CPT2	-0.4658	15.6536	-1.4366
genistein	Tyrosine kinase inhibitor	CFTR|ESR2|EGFR|ESR1|ESRRA|ESRRB|ESRRG|NCOA1|NCOA2|PPARG|PTK2B|TOP2A|TRPC5	-0.4657	15.6536	-1.4365
torin-1	MTOR inhibitor|PI3K inhibitor	MTOR|PIK3CA	-0.4656	15.6536	-1.4362
AP-26113	ALK inhibitor	ALK|EGFR	-0.4655	15.6536	-1.436
TG-101209	JAK inhibitor	JAK2|JAK3	-0.4654	15.6536	-1.4356
teniposide	Topoisomerase inhibitor	TOP2A|CYP3A5|TOP2B	-0.4654	15.6536	-1.4356
mocetinostat	HDAC inhibitor	HDAC1|HDAC2|HDAC3|HDAC11	-0.4654	15.6536	-1.4355
epirubicin	Topoisomerase inhibitor	TOP2A|CHD1	-0.4654	15.6536	-1.4355
aloisine	CDK inhibitor|CFTR channel agonist|GSK inhibitor	CDK2	-0.4654	15.6536	-1.4354
alisertib	Aurora kinase inhibitor	AURKA	-0.4653	15.6536	-1.4351
manumycin-a	Farnesyltransferase inhibitor|NFKB inhibitor	FNTA|IKBKB	-0.4652	15.6536	-1.435
etravirine	Non-nucleoside reverse transcriptase inhibitor	CYP2C19|CYP3A4|CYP2C9	-0.4652	15.6536	-1.4348
GSK-1059615	PI3K inhibitor	PIK3CA|PIK3CG	-0.4651	15.6536	-1.4346
voreloxin	Topoisomerase inhibitor	TOP2A|PRKDC	-0.465	15.6536	-1.4344
fluocinolone-acetonide	Glucocorticoid receptor agonist	NR3C1|SERPINA6	-0.4648	15.6536	-1.4337
teniposide	Topoisomerase inhibitor	TOP2A|CYP3A5|TOP2B	-0.4647	15.6536	-1.4335
AZ-960	JAK inhibitor	JAK2|JAK3	-0.4648	15.6536	-1.4335
ZK-93423	Benzodiazepine receptor agonist	GABRA1|GABRA2|GABRA3|GABRA5|GABRB2|GABRG2	-0.4647	15.6536	-1.4333
nortriptyline	Tricyclic antidepressant	KCNJ10|SLC6A2|SLC6A4|CYP2C19|PIK3CD|ADRA1A|ADRA1B|ADRA1D|ADRA2A|ADRA2B|ADRA2C|ADRB1|ADRB2|ADRB3|CHRM1|CHRM2|CHRM3|CHRM4|CHRM5|DRD2|HRH1|HTR1A|HTR2A|HTR2C|HTR6|PGRMC1|SIGMAR1	-0.4646	15.6536	-1.4332
alisertib	Aurora kinase inhibitor	AURKA	-0.4646	15.6536	-1.4331
CD-437	Retinoid receptor agonist	RARG	-0.4646	15.6536	-1.4331
LDN-193189	Serine/threonine kinase inhibitor	ACVR1|BMPR1A	-0.4643	15.6536	-1.4323
DG-041	Prostanoid receptor antagonist	PTGER3	-0.4643	15.6536	-1.4322
pelitinib	EGFR inhibitor	EGFR|ERBB2	-0.4643	15.6536	-1.4321
SU-11652	Tyrosine kinase inhibitor	KDR|PDGFRB	-0.4642	15.6536	-1.4318
daunorubicin	RNA synthesis inhibitor|Topoisomerase inhibitor	TOP2A|TOP2B	-0.4641	15.6536	-1.4314
PD-184352	MEK inhibitor	MAP2K1|MAP2K2|MAP3K1|MAP3K2	-0.464	15.6536	-1.4311
golvatinib	VEGFR inhibitor	MET|KDR	-0.464	15.6536	-1.4311
KU-0060648	DNA inhibitor|PI3K inhibitor	PIK3CA|PIK3CB|PIK3CD|PRKDC	-0.4638	15.6536	-1.4308
SN-38	Topoisomerase inhibitor	TOP1	-0.4638	15.6536	-1.4307
KIN001-242	Protein kinase inhibitor	RPS6KA3	-0.4637	15.6536	-1.4304
CGK-733	ATM kinase inhibitor|ATR kinase inhibitor	ATM|ATR	-0.4637	15.6536	-1.4304
CNX-774	BTK inhibitor	BTK	-0.4636	15.6536	-1.4301
voapaxar	Thrombin inhibitor	F2R	-0.4636	15.6536	-1.4301
vandetanib	EGFR inhibitor|RET tyrosine kinase inhibitor|VEGFR inhibitor	EGFR|KDR|RET|FLT1|FLT4|PTK6|TEK|FLT3|KIT|EPHA1|EPHA10|EPHA2|EPHA3|EPHA4|EPHA5|EPHA6|EPHA7|EPHA8|EPHB1|EPHB2|EPHB3|EPHB4|EPHB6|ERBB2|ERBB3|ERBB4|SRC|VEGFA	-0.4635	15.6536	-1.4298
PD-0325901	MEK inhibitor|MAP kinase inhibitor|Protein kinase inhibitor	MAP2K1|MAP2K2	-0.4635	15.6536	-1.4295
AVN-944	Inosine monophosphate dehydrogenase inhibitor	IMPDH2|IMPDH1	-0.4633	15.6536	-1.4291
SU-11274	Hepatocyte growth factor receptor inhibitor|Tyrosine kinase inhibitor	MET	-0.4632	15.6536	-1.4289
methylnaltrexone	Opioid receptor antagonist	OPRM1|OPRK1|OPRD1	-0.4632	15.6536	-1.4287
NSC-3852	HDAC inhibitor	HDAC1	-0.4632	15.6536	-1.4287
CGK-733	ATM kinase inhibitor|ATR kinase inhibitor	ATM|ATR	-0.4632	15.6536	-1.4287
NVP-TAE226	Protein tyrosine kinase inhibitor	IGF1R|PTK2	-0.4628	15.6536	-1.4275
guanfacine	Adrenergic receptor agonist	ADRA2A|ADRA2B|CYP3A5|HCN1|HCN2|HCN3|HCN4|ADRA2C	-0.4628	15.6536	-1.4275
AZD-5438	CDK inhibitor	CCNB1|CCNE1|CDK1|CDK2|KCNH2	-0.4628	15.6536	-1.4275
PHA-793887	CDK inhibitor	CDK1|CDK2|CDK4|CDK5|CCND1|CCNE1|CDK7|CDK9	-0.4628	15.6536	-1.4274
scriptaid	HDAC inhibitor	HDAC1|HDAC2|HDAC3|HDAC4|HDAC5|HDAC6|HDAC7|HDAC8|HDAC9	-0.4627	15.6536	-1.4273
LDN-193189	Serine/threonine kinase inhibitor	ACVR1|BMPR1A	-0.4627	15.6536	-1.4272
AZ-20	ATR kinase inhibitor	ATR|MTOR	-0.4626	15.6536	-1.427
ZM-447439	Aurora kinase inhibitor	AURKA|AURKB	-0.4626	15.6536	-1.4268
ponatinib	Bcr-Abl inhibitor|FLT3 inhibitor|PDGFR inhibitor	ABL1|BCR|FLT3|RET|FGFR1|FGFR2|FGFR3|FGFR4|KIT|TEK|CYP2C8|CYP3A5|FGF2|FLT1|KDR|LCK|LYN|PDGFRA|SRC	-0.4625	15.6536	-1.4265
SGI-1776	PIM inhibitor	PIM1|FLT3|PIM2|PIM3	-0.4623	15.6536	-1.4259
PI-103	PI3K inhibitor|MTOR inhibitor	PIK3CA|PIK3CG|MTOR|PIK3CB|PIK3CD|PRKDC	-0.4623	15.6536	-1.4259
pyrrolidine-dithiocarbamate	NFKB inhibitor	HSD11B1|RELA	-0.4622	15.6536	-1.4258
CS-110266	Dopamine receptor agonist	SLC6A3	-0.4622	15.6536	-1.4257
BS-181	CDK inhibitor	CDK7	-0.4622	15.6536	-1.4257
RS-39604	Serotonin receptor antagonist	HTR4	-0.4621	15.6536	-1.4253
CD-437	Retinoid receptor agonist	RARG	-0.462	15.6536	-1.4251
DBeQ	ATPase inhibitor	CASP3	-0.462	15.6536	-1.425
fenretinide	Apoptosis stimulant|Retinoid receptor agonist	RARA|CYP2C8|CYP3A5|RARG	-0.462	15.6536	-1.4249
idarubicin	Topoisomerase inhibitor	TOP2A	-0.4618	15.6536	-1.4246
GW-405833	Cannabinoid receptor agonist	CNR2	-0.4618	15.6536	-1.4245
LDN-193189	Serine/threonine kinase inhibitor	ACVR1|BMPR1A	-0.4618	15.6536	-1.4243
chloroquine	Antimalarial	CYP2C8|GSTA2|MRGPRX1|TLR9|TNF	-0.4617	15.6536	-1.4242
epoxycholesterol	LXR agonist	NR1H3|NR1H2	-0.4617	15.6536	-1.4241
ZSTK-474	PI3K inhibitor	PIK3CG|PIK3CA|PIK3CB|PIK3CD	-0.4617	15.6536	-1.4241
SN-38	Topoisomerase inhibitor	TOP1	-0.4616	15.6536	-1.424
pyrimethamine	Dihydrofolate reductase inhibitor	DHFRP1|HEXA|STAT3|DHFR|SLC47A1	-0.4614	15.6536	-1.4232
sirolimus	MTOR inhibitor	MTOR|FKBP1A|CCR5|FGF2	-0.4612	15.6536	-1.4227
NVP-BGJ398	FGFR inhibitor	FGFR1|FGFR2|FGFR3|FGFR4|KDR	-0.4612	15.6536	-1.4225
epoxycholesterol	LXR agonist	NR1H3|NR1H2	-0.4611	15.6536	-1.4224
crizotinib	ALK inhibitor	ALK|MET|CYP2B6|CYP3A5|MST1R|ROS1	-0.4611	15.6536	-1.4223
apicidin	HDAC inhibitor	HDAC1|HDAC2|HDAC3|HDAC8|HDAC10|HDAC11|HDAC4|HDAC5|HDAC6|HDAC7|HDAC9	-0.4611	15.6536	-1.4222
barasertib-HQPA	Aurora kinase inhibitor	AURKB|AURKC|AURKA	-0.461	15.6536	-1.422
bosutinib	Src inhibitor|Abl inhibitor|Bcr-Abl inhibitor	ABL1|SRC|BCR|LYN|CAMK2G|HCK|CAMK1D|CDK2|FRK|FYN|MAP2K1|MAP2K2|MAP3K2|MAP4K5|STK10|STK24|STK4|TNK2|TXK	-0.4609	15.6536	-1.4218
nortriptyline	Tricyclic antidepressant	KCNJ10|SLC6A2|SLC6A4|CYP2C19|PIK3CD|ADRA1A|ADRA1B|ADRA1D|ADRA2A|ADRA2B|ADRA2C|ADRB1|ADRB2|ADRB3|CHRM1|CHRM2|CHRM3|CHRM4|CHRM5|DRD2|HRH1|HTR1A|HTR2A|HTR2C|HTR6|PGRMC1|SIGMAR1	-0.4606	15.6536	-1.4208
I-BET-762	Bromodomain inhibitor	BRD2|BRD3|BRD4|APOA1	-0.4605	15.6536	-1.4206
SB-218078	CHK inhibitor	CHEK1	-0.4606	15.6536	-1.4206
KW-2449	Abl inhibitor|Aurora kinase inhibitor|FLT3 inhibitor	FLT3|ABL1|AURKA|FGFR1|AURKB	-0.4605	15.6536	-1.4205
vortioxetine	Serotonin receptor agonist|Serotonin receptor antagonist	HTR1A|HTR1B|HTR7|SLC6A4|HTR1D|CYP2B6|CYP2C19|CYP2C8|CYP3A5|HTR2A|HTR2C|HTR3A|HTR5A|HTR6	-0.4604	15.6536	-1.42
L-690488	Inositol monophosphatase inhibitor	IMPA1	-0.4603	15.6536	-1.4199
RG-2833	HDAC inhibitor	HDAC1|HDAC3	-0.4603	15.6536	-1.4198
PF-04691502	MTOR inhibitor|PI3K inhibitor	MTOR|PIK3CA|PIK3CB|PIK3CD|PIK3CG	-0.4603	15.6536	-1.4198
MK-2206	AKT inhibitor	AKT1|AKT2|AKT3	-0.4602	15.6536	-1.4197
KHS-101	Neural stem cell inducer	TACC3	-0.4602	15.6536	-1.4196
refametinib	MEK inhibitor	MAP2K1|MAP2K2	-0.4602	15.6536	-1.4195
rucaparib	PARP inhibitor	PARP1|PARP2	-0.4602	15.6536	-1.4195
lestaurtinib	FLT3 inhibitor|Growth factor receptor inhibitor|JAK inhibitor	FLT3|NTRK1|JAK2|NTRK2|NTRK3	-0.4602	15.6536	-1.4195
BMS-777607	AXL kinase inhibitor|FLT3 inhibitor|HGF receptor inhibitor|Macrophage inhibitor|MET inhibitor|Tyrosine kinase inhibitor	MET|AXL|MERTK|MST1R|TYRO3|FLT3	-0.4601	15.6536	-1.4192
cyproheptadine	Histamine receptor antagonist	HRH1|HTR2B|ADRA1A|ADRA1B|ADRA1D|CHRM1|CHRM2|CHRM3|HTR2A|HTR2C|HTR6|HTR7	-0.4601	15.6536	-1.4192
tubastatin-a	HDAC inhibitor	HDAC6	-0.4601	15.6536	-1.4191
SB-939	HDAC inhibitor	HDAC1|HDAC2|HDAC10|HDAC3|HDAC4|HDAC5|HDAC9	-0.46	15.6536	-1.419
ENMD-2076	Aurora kinase inhibitor|FLT3 inhibitor|VEGFR inhibitor	AURKA|FLT3|KDR|PDGFRA|SRC|CSF1R|EPHA1|FGFR1|FGFR2|FGFR3|FLT4|KIT|PTK2	-0.46	15.6536	-1.4188
WYE-125132	MTOR inhibitor	MTOR|PIK3CA	-0.4599	15.6536	-1.4185
JNJ-7706621	CDK inhibitor	CDK1|CDK2|AURKA|AURKB	-0.4592	15.6536	-1.4164
PF-03814735	Aurora kinase inhibitor	AURKA|AURKB	-0.4592	15.6536	-1.4163
carmofur	Thymidylate synthase inhibitor	TYMS	-0.4592	15.6536	-1.4163
I-BET-762	Bromodomain inhibitor	BRD2|BRD3|BRD4|APOA1	-0.4591	15.6536	-1.4161
TG-101348	JAK inhibitor|FLT3 inhibitor	JAK2|FLT3|RET|BRD4|JAK1|JAK3|TYK2	-0.4591	15.6536	-1.416
KO-143	Breast cancer resistance protein inhibitor	ABCG2|ABCB1|ABCC1	-0.4589	15.6536	-1.4154
epirubicin	Topoisomerase inhibitor	TOP2A|CHD1	-0.4587	15.6536	-1.4149
AEE-788	EGFR inhibitor|VEGFR inhibitor	EGFR|ERBB2|KDR|ERBB4|FLT1|FGFR2|FGFR3	-0.4587	15.6536	-1.4148
PI-103	PI3K inhibitor|MTOR inhibitor	PIK3CA|PIK3CG|MTOR|PIK3CB|PIK3CD|PRKDC	-0.4586	15.6536	-1.4147
fluoxetine	Selective serotonin reuptake inhibitor (SSRI)	SLC6A4|CYP2C19|ANO1|HTR2B	-0.4585	15.6536	-1.4142
hyperforin	Cyclooxygenase inhibitor|Dopamine uptake inhibitor|Interleukin inhibitor|Lipoxygenase inhibitor|Serotonin reuptake inhibitor	NR1I2|ALOX5|PTGS1	-0.4583	15.6536	-1.4135
voxtalisib	MTOR inhibitor|PI3K inhibitor	MTOR|PIK3CA	-0.4582	15.6536	-1.4134
foretinib	VEGFR inhibitor	KDR|MET|AXL|FLT3|KIT|MST1R|TEK|FLT1|FLT4	-0.4582	15.6536	-1.4132
trifluridine	DNA directed DNA polymerase inhibitor|Thymidylate synthase inhibitor	TYMS	-0.4578	15.6536	-1.4122
niclosamide	DNA inhibitor|STAT inhibitor	STAT3	-0.4577	15.6536	-1.4118
PF-573228	Focal adhesion kinase inhibitor	CDK1|CDK2|CDK7|GSK3B|IKBKB	-0.4577	15.6536	-1.4117
thiostrepton	Protein synthesis inhibitor	FOXM1	-0.4576	15.6536	-1.4116
BAY-11-7085	NFKB inhibitor	NFKBIA	-0.4573	15.6536	-1.4106
losartan	Angiotensin receptor antagonist	AGTR1	-0.4572	15.6536	-1.4104
WAY-170523	Metalloproteinase inhibitor	MMP13	-0.4572	15.6536	-1.4104
oxybenzone	Lipase inhibitor	LIPE	-0.4569	15.6536	-1.4094
voxtalisib	MTOR inhibitor|PI3K inhibitor	MTOR|PIK3CA	-0.4567	15.6536	-1.4088
pralatrexate	Dihydrofolate reductase inhibitor	DHFR|SLC19A1|TYMS	-0.4567	15.6536	-1.4086
PF-03758309	P21 activated kinase inhibitor	PAK4	-0.4566	15.6536	-1.4085
GSK-2334470	PDK inhibitor	PDPK1|AURKA|AURKB|PDK1	-0.4564	15.6536	-1.4079
bithionol	Autotaxin inhibitor	ESR1|ESR2|MCL1	-0.4564	15.6536	-1.4077
dovitinib	EGFR inhibitor|FGFR inhibitor|FLT3 inhibitor|PDGFR inhibitor|VEGFR inhibitor	FGFR1|FLT1|KDR|EGFR|FGFR3|FLT3|FLT4|KIT|PDGFRB|CSF1R|FGFR2|INSR|PDGFRA	-0.4563	15.6536	-1.4074
seocalcitol	Vitamin D receptor agonist	VDR	-0.4562	15.6536	-1.4073
bisbenzimide	DNA binding agent	TOP1	-0.4562	15.6536	-1.4072
MK-2206	AKT inhibitor	AKT1|AKT2|AKT3	-0.4562	15.6536	-1.4071
methylene-blue	Nitric oxide production inhibitor|Guanylyl cyclase inhibitor|Monoamine oxidase inhibitor|Tau aggregation inhibitor	ACHE|MAPT	-0.4562	15.6536	-1.407
trifluoperazine	Dopamine receptor antagonist	DRD2|ABCG2|CAMK2A|SCN4A|SCN9A|ADRA1A|CALM1|CALY|DRD4|HRH1|HTR2A|HTR2C|S100A4|TNNC1	-0.456	15.6536	-1.4065
fulvestrant	Estrogen receptor antagonist	ESR1|EPHX2|ESR2|GPER1	-0.4559	15.6536	-1.4061
CD-437	Retinoid receptor agonist	RARG	-0.4557	15.6536	-1.4056
thioridazine	Dopamine receptor antagonist	DRD2|HTR2A|DRD1|HTR2C|CHRNA7|MALT1|ADRA1A|ADRA1B|DRD3|DRD4|DRD5|HRH1|HTR1A|HTR6|HTR7|KCNH2	-0.4556	15.6536	-1.4055
arglabin	Farnesyltransferase inhibitor	FNTA|NFKB1	-0.4557	15.6536	-1.4055
LCL-161	XIAP inhibitor	BIRC2|XIAP	-0.4556	15.6536	-1.4054
PD-184352	MEK inhibitor	MAP2K1|MAP2K2|MAP3K1|MAP3K2	-0.4556	15.6536	-1.4054
GSK-J4	Histone lysine demethylase inhibitor	KDM6A|KDM6B|TNF	-0.4556	15.6536	-1.4052
GR-127935	Serotonin receptor antagonist	HTR1B|HTR1D|HTR1A|HTR2A|HTR2C|HTR1E|HTR1F|HTR2B|HTR6	-0.4555	15.6536	-1.4051
MK-2206	AKT inhibitor	AKT1|AKT2|AKT3	-0.4555	15.6536	-1.4049
UNC-2250	MER tyrosine kinase inhibitor	MERTK	-0.4553	15.6536	-1.4044
foretinib	VEGFR inhibitor	KDR|MET|AXL|FLT3|KIT|MST1R|TEK|FLT1|FLT4	-0.4553	15.6536	-1.4043
lovastatin	HMGCR inhibitor	HMGCR|CYP3A5|HDAC2|ITGAL|NR1I2	-0.4552	15.6536	-1.404
staurosporine	PKC inhibitor	CDK2|GSK3B	-0.4551	15.6536	-1.4039
acivicin	Gamma glutamyltransferase Inhibitors	CAD|GGT1|CTPS1	-0.4551	15.6536	-1.4039
PLX-4720	RAF inhibitor	BRAF|KDR	-0.4551	15.6536	-1.4037
pimavanserin	Serotonin receptor antagonist	HTR2A|DRD2	-0.455	15.6536	-1.4036
ingenol-mebutate	PKC activator	PRKCD|PRKCA|PRKCB|PRKCE|PRKCG	-0.4549	15.6536	-1.4033
ACY-1215	HDAC inhibitor	HDAC6|HDAC1|HDAC2|HDAC3|HDAC8	-0.4547	15.6536	-1.4025
dipivefrine	Adrenergic receptor agonist	ADRA1A|ACHE|ADRA2A|ADRB2|BCHE	-0.4547	15.6536	-1.4025
tubastatin-a	HDAC inhibitor	HDAC6	-0.4546	15.6536	-1.4023
adarotene	Retinoid receptor agonist	RARG|RARA|RARB	-0.4546	15.6536	-1.4023
GDC-0941	PI3K inhibitor	PIK3CG|PIK3CA|PIK3CB|PIK3CD	-0.4546	15.6536	-1.4022
OTX-015	Bromodomain inhibitor	BRD2|BRD3|BRD4|SELE|VCAM1	-0.4545	15.6536	-1.4019
PD-0325901	MEK inhibitor|MAP kinase inhibitor|Protein kinase inhibitor	MAP2K1|MAP2K2	-0.4544	15.6536	-1.4016
pitavastatin	HMGCR inhibitor	HMGCR|APOA1|CYP2C8	-0.4542	15.6536	-1.4011
BML-259	CDK inhibitor	CDK2|CDK5	-0.4541	15.6536	-1.4006
GSK-1070916	Aurora kinase inhibitor	AURKB|AURKC|AURKA|CYP2D6|CYP3A4	-0.454	15.6536	-1.4004
triciribine	AKT inhibitor	AKT1|AKT2|AKT3	-0.4539	15.6536	-1.4002
AZD-3463	ALK inhibitor|IGF-1 inhibitor	ALK|IGF1R	-0.4539	15.6536	-1.3999
prednisolone-acetate	Glucocorticoid receptor agonist	NR3C1	-0.4538	15.6536	-1.3998
amonafide	Topoisomerase inhibitor	TOP2A|TOP2B	-0.4538	15.6536	-1.3997
WYE-125132	MTOR inhibitor	MTOR|PIK3CA	-0.4536	15.6536	-1.3992
PD-0325901	MEK inhibitor|MAP kinase inhibitor|Protein kinase inhibitor	MAP2K1|MAP2K2	-0.4531	15.6536	-1.3976
E-7449	PARP inhibitor	PARP1|PARP2|TNKS|TNKS2	-0.453	15.6536	-1.3974
erteberel	Estrogen receptor agonist	ESR2|ESR1	-0.453	15.6536	-1.3973
KU-55933	ATM kinase inhibitor	ATM|PRKDC	-0.4529	15.6536	-1.397
terazosin	Adrenergic receptor antagonist	ADRA1D|ADRA1A|ADRA1B|KCNH2|KCNH6|KCNH7	-0.4529	15.6536	-1.3969
PF-05212384	MTOR inhibitor|PI3K inhibitor	MTOR|PIK3CA|PIK3CG	-0.4528	15.6536	-1.3966
netupitant	Tachykinin antagonist	TACR1	-0.4527	15.6536	-1.3964
importazole	Importin inhibitor	KPNB1	-0.4527	15.6536	-1.3964
PLX-4720	RAF inhibitor	BRAF|KDR	-0.4526	15.6536	-1.3962
BRD-K63750851	Dehydrogenase inhibitor|Inositol monophosphatase inhibitor	IMPDH1|IMPDH2	-0.4527	15.6536	-1.3962
NVP-TAE226	Protein tyrosine kinase inhibitor	IGF1R|PTK2	-0.4525	15.6536	-1.3958
miconazole	Bacterial cell wall synthesis inhibitor	CYP19A1|KCNH2|KCNH6|KCNH7|KCNMA1|KCNMB1|KCNMB2|KCNMB3|KCNMB4|KCNN1|KCNN2|KCNN3|KCNN4|NOS2|NOS3|TRPM2|TRPV5	-0.4524	15.6536	-1.3955
meclizine	Constitutive androstane receptor (CAR) agonist	NR1I3|HRH1	-0.4524	15.6536	-1.3953
PCI-24781	HDAC inhibitor	HDAC1|HDAC2|HDAC3|HDAC6|HDAC10|HDAC8	-0.4523	15.6536	-1.395
papaverine	Phosphodiesterase inhibitor	PDE10A|PDE4B|PDE5A	-0.4522	15.6536	-1.3948
BMS-754807	IGF-1 inhibitor	IGF1R|AKT1	-0.4519	15.6536	-1.394
tegafur	Thymidylate synthase inhibitor	TYMS	-0.4519	15.6536	-1.3939
bortezomib	NFKB inhibitor|Proteasome inhibitor	PSMB5|PSMB1|PSMB2|CASP3|CYP2C19|NFKB1|PSMA1|PSMA2|PSMA3|PSMA4|PSMA5|PSMA6|PSMA7|PSMA8|PSMB10|PSMB11|PSMB3|PSMB4|PSMB6|PSMB7|PSMB8|PSMB9|PSMD1|PSMD2|RELA	-0.4519	15.6536	-1.3938
paclitaxel	Tubulin inhibitor	TUBB|NR1I2|ABCB1|CYP2C8|BCL2|MAP2|MAP4|MAPT|TLR4|TUBB1	-0.4517	15.6536	-1.3934
LY-294002	MTOR inhibitor|DNA dependent protein kinase inhibitor|Phosphodiesterase inhibitor|PLK inhibitor	MTOR|PIK3CD|PIK3CG|PIK3CA|PLK1|PRKDC|PIK3CB|PDE2A|AKT1|CHEK1|GSK3B|LCK|MAPK1|MAPK11|MAPK12|MAPK14|MAPK8|PRKCA|ROCK1|RPS6KB1|SGK1	-0.4516	15.6536	-1.393
ZD-7155	Angiotensin receptor antagonist	AGTR1	-0.4516	15.6536	-1.3929
atorvastatin	HMGCR inhibitor	HMGCR|DPP4|CYP3A5|FASLG|AHR	-0.4515	15.6536	-1.3927
SGI-1776	PIM inhibitor	PIM1|FLT3|PIM2|PIM3	-0.4515	15.6536	-1.3927
teniposide	Topoisomerase inhibitor	TOP2A|CYP3A5|TOP2B	-0.4513	15.6536	-1.3921
SB-939	HDAC inhibitor	HDAC1|HDAC2|HDAC10|HDAC3|HDAC4|HDAC5|HDAC9	-0.4512	15.6536	-1.3918
topotecan	Topoisomerase inhibitor	TOP1|TOP1MT	-0.4512	15.6536	-1.3917
vanoxerine	Dopamine receptor antagonist	SLC6A3|MAOA|MAOB	-0.4511	15.6536	-1.3914
AG-879	Tyrosine kinase inhibitor|Angiogenesis inhibitor|VEGFR inhibitor	KDR|ERBB2|NTRK1	-0.451	15.6536	-1.3913
NVP-BSK805	JAK inhibitor	JAK2	-0.4511	15.6536	-1.3913
sirolimus	MTOR inhibitor	MTOR|FKBP1A|CCR5|FGF2	-0.451	15.6536	-1.391
Y-26763	Potassium channel activator	KCNJ8|ABCC9	-0.4508	15.6536	-1.3907
ivacaftor	CFTR channel antagonist	CFTR|CYP3A5|CYP3A7	-0.4507	15.6536	-1.3903
razoxane	Chelating agent|Topoisomerase inhibitor	TOP2A|TOP2B	-0.4507	15.6536	-1.3903
PD-102807	Acetylcholine receptor antagonist	CHRM4	-0.4507	15.6536	-1.3901
menadione	Mitochondrial inhibitor|Phosphatase inhibitor	PKM|AOX1|BGLAP|F10|F2|F7|F9|GGCX|NQO1|NQO2|PROC|PROS1|PROZ|VKORC1|VKORC1L1	-0.4506	15.6536	-1.39
MLN-0128	MTOR inhibitor	MTOR|PIK3CA|PIK3CD|PIK3CG	-0.4505	15.6536	-1.3895
alvocidib	CDK inhibitor	CDK2|CDK4|CDK1|CDK6|CDK7|CDK9|CDK5|CDK8|EGFR|PYGM|BCL2|BIRC5|CCNT1|MCL1|XIAP	-0.4504	15.6536	-1.3892
asiatic-acid	Apoptosis stimulant	PYGM	-0.4503	15.6536	-1.3891
GSK-690693	AKT inhibitor	AKT1|AKT2|AKT3|PAK4|PAK6|PAK7|PRKCQ|PRKG1|PRKX	-0.4501	15.6536	-1.3884
MK-2206	AKT inhibitor	AKT1|AKT2|AKT3	-0.4501	15.6536	-1.3883
CAY-10470	NFKB inhibitor	NFKB1|TNF	-0.45	15.6536	-1.3882
metronidazole	Bacterial DNA inhibitor	CYP2C8|CYP2E1|CYP3A5|CYP3A7|CYP2C9|CYP3A4	-0.45	15.6536	-1.3881
AZD-9291	EGFR inhibitor	EGFR	-0.4499	15.6536	-1.3878
lacidipine	Calcium channel blocker	CACNA1C	-0.4499	15.6536	-1.3878
fluoxetine	Selective serotonin reuptake inhibitor (SSRI)	SLC6A4|CYP2C19|ANO1|HTR2B	-0.4499	15.6536	-1.3876
TPCA-1	IKK inhibitor	IKBKB	-0.4498	15.6536	-1.3873
niclosamide	DNA inhibitor|STAT inhibitor	STAT3	-0.4497	15.6536	-1.3872
CCT-018159	HSP inhibitor	HSP90AA1|HSP90AB1	-0.4497	15.6536	-1.3872
rimcazole	Sigma receptor antagonist	SIGMAR1	-0.4496	15.6536	-1.3869
resatorvid	TLR antagonist	TLR4	-0.4496	15.6536	-1.3868
CGK-733	ATM kinase inhibitor|ATR kinase inhibitor	ATM|ATR	-0.4494	15.6536	-1.3863
BRD-K07303502	Cytosolic phospholipase inhibitor	PLA2G4A	-0.4494	15.6536	-1.3861
mocetinostat	HDAC inhibitor	HDAC1|HDAC2|HDAC3|HDAC11	-0.4494	15.6536	-1.3861
thiostrepton	Protein synthesis inhibitor	FOXM1	-0.4493	15.6536	-1.386
etoposide	Topoisomerase inhibitor	TOP2A|TOP2B|CYP2E1|CYP3A5	-0.4493	15.6536	-1.3857
BRD-K04546108	JAK inhibitor	JAK3	-0.4491	15.6536	-1.3854
BIX-01294	DNA inhibitor|Histone lysine methyltransferase inhibitor	EHMT2|EHMT1	-0.4491	15.6536	-1.3852
DG-041	Prostanoid receptor antagonist	PTGER3	-0.4491	15.6536	-1.3852
vorinostat	HDAC inhibitor	HDAC1|HDAC2|HDAC3|HDAC6|HDAC8|HDAC10|HDAC11|HDAC5|HDAC9	-0.449	15.6536	-1.3851
adarotene	Retinoid receptor agonist	RARG|RARA|RARB	-0.449	15.6536	-1.3849
TW-37	BCL inhibitor	BCL2|BCL2L1|MCL1	-0.4489	15.6536	-1.3847
valrubicin	DNA inhibitor|Topoisomerase inhibitor	TOP2A	-0.4487	15.6536	-1.3839
mocetinostat	HDAC inhibitor	HDAC1|HDAC2|HDAC3|HDAC11	-0.4485	15.6536	-1.3835
PF-03814735	Aurora kinase inhibitor	AURKA|AURKB	-0.4485	15.6536	-1.3835
deforolimus	MTOR inhibitor	MTOR	-0.4483	15.6536	-1.3828
zonisamide	Sodium channel inhibitor|Calcium channel blocker	SCN1A|CA1|CA12|CA7|SCN11A|SCN2A|SCN3A|SCN4A|SCN5A|SCN9A|CA10|CA11|CA13|CA14|CA2|CA3|CA4|CA5A|CA5B|CA6|CA8|CA9|CACNA1G|CACNA1H|CACNA1I|MAOA|MAOB|SCN10A|SCN1B|SCN2B|SCN3B|SCN4B|SCN7A|SCN8A	-0.4481	15.6536	-1.3821
AZ-628	RAF inhibitor	BRAF|RAF1	-0.448	15.6536	-1.3818
ENMD-2076	Aurora kinase inhibitor|FLT3 inhibitor|VEGFR inhibitor	AURKA|FLT3|KDR|PDGFRA|SRC|CSF1R|EPHA1|FGFR1|FGFR2|FGFR3|FLT4|KIT|PTK2	-0.4479	15.6536	-1.3817
regorafenib	FGFR inhibitor|KIT inhibitor|PDGFR inhibitor|RAF inhibitor|RET inhibitor|VEGFR inhibitor	KDR|KIT|RET|FLT1|FLT4|PDGFRA|TEK|BRAF|ABL1|DDR2|FGFR1|FGFR2|FRK|MAPK11|PDGFRB|RAF1|CYP2B6|CYP2C19|CYP2C8|FGF2|EPHA2|NTRK1	-0.4479	15.6536	-1.3816
GDC-0199	BCL inhibitor	BCL2	-0.4479	15.6536	-1.3815
gliquidone	Sulfonylurea	ABCC8|KCNJ11|KCNJ10|KCNJ8	-0.4478	15.6536	-1.3812
cyclosporin-a	Calcineurin inhibitor	PPIA|PPP3CA	-0.4476	15.6536	-1.3805
fenretinide	Apoptosis stimulant|Retinoid receptor agonist	RARA|CYP2C8|CYP3A5|RARG	-0.4475	15.6536	-1.3804
pinaverium	Calcium channel blocker	CACNA1C	-0.4475	15.6536	-1.3802
BIX-01294	DNA inhibitor|Histone lysine methyltransferase inhibitor	EHMT2|EHMT1	-0.4474	15.6536	-1.38
ingenol-mebutate	PKC activator	PRKCD|PRKCA|PRKCB|PRKCE|PRKCG	-0.4474	15.6536	-1.38
QL-X-138	MTOR inhibitor	BTK|JAK3|MKNK2|MTOR|PRKDC	-0.4473	15.6536	-1.3796
neratinib	EGFR inhibitor	EGFR|ERBB2|ERBB4|KDR	-0.4473	15.6536	-1.3796
topotecan	Topoisomerase inhibitor	TOP1|TOP1MT	-0.4472	15.6536	-1.3794
NVP-TAE226	Protein tyrosine kinase inhibitor	IGF1R|PTK2	-0.447	15.6536	-1.3788
PF-03814735	Aurora kinase inhibitor	AURKA|AURKB	-0.4469	15.6536	-1.3785
R-547	CDK inhibitor	CDK2|CDK1|CDK4|CCND1|CCNE1|CDK7	-0.4469	15.6536	-1.3785
epirubicin	Topoisomerase inhibitor	TOP2A|CHD1	-0.4469	15.6536	-1.3785
camptothecin	Topoisomerase inhibitor	TOP1|HIF1A	-0.4469	15.6536	-1.3784
pyrvinium-pamoate	Androgen receptor antagonist|AKT inhibitor	AR	-0.4467	15.6536	-1.3779
BGT-226	PI3K inhibitor	MTOR|PIK3CG|PIK3CA|PIK3CB	-0.4464	15.6536	-1.377
AZD-6482	PI3K inhibitor	PIK3CB|PIK3CD|PIK3CG|PIK3CA	-0.4464	15.6536	-1.377
SB-218078	CHK inhibitor	CHEK1	-0.4463	15.6536	-1.3765
CD-437	Retinoid receptor agonist	RARG	-0.4461	15.6536	-1.3762
regadenoson	Adenosine receptor agonist	ADORA2A|ADORA1|ADORA2B|ADORA3	-0.4461	15.6536	-1.3759
thiostrepton	Protein synthesis inhibitor	FOXM1	-0.446	15.6536	-1.3756
importazole	Importin inhibitor	KPNB1	-0.4459	15.6536	-1.3753
miconazole	Bacterial cell wall synthesis inhibitor	CYP19A1|KCNH2|KCNH6|KCNH7|KCNMA1|KCNMB1|KCNMB2|KCNMB3|KCNMB4|KCNN1|KCNN2|KCNN3|KCNN4|NOS2|NOS3|TRPM2|TRPV5	-0.4459	15.6536	-1.3753
thiostrepton	Protein synthesis inhibitor	FOXM1	-0.4458	15.6536	-1.3751
PD-184352	MEK inhibitor	MAP2K1|MAP2K2|MAP3K1|MAP3K2	-0.4457	15.6536	-1.3748
AZD-2014	MTOR inhibitor	MTOR	-0.4457	15.6536	-1.3747
scriptaid	HDAC inhibitor	HDAC1|HDAC2|HDAC3|HDAC4|HDAC5|HDAC6|HDAC7|HDAC8|HDAC9	-0.4457	15.6536	-1.3747
DL-PDMP	Glucosyltransferase inhibitor	UGCG|ASAH1	-0.4456	15.6536	-1.3744
AS-604850	PI3K inhibitor	PIK3CG|PIK3CA	-0.4456	15.6536	-1.3744
lonidamine	Glucokinase inhibitor	GCK	-0.4455	15.6536	-1.3743
dynasore	Dynamin inhibitor	DNM1|DNM1L|DNM2	-0.4456	15.6536	-1.3743
ponatinib	Bcr-Abl inhibitor|FLT3 inhibitor|PDGFR inhibitor	ABL1|BCR|FLT3|RET|FGFR1|FGFR2|FGFR3|FGFR4|KIT|TEK|CYP2C8|CYP3A5|FGF2|FLT1|KDR|LCK|LYN|PDGFRA|SRC	-0.4455	15.6536	-1.3741
deforolimus	MTOR inhibitor	MTOR	-0.4452	15.6536	-1.3734
L-690488	Inositol monophosphatase inhibitor	IMPA1	-0.4452	15.6536	-1.3732
ruxolitinib	JAK inhibitor	JAK1|JAK2|TYK2|JAK3	-0.4452	15.6536	-1.3732
JWE-035	Aurora kinase inhibitor	AURKA	-0.445	15.6536	-1.3728
AG-879	Tyrosine kinase inhibitor|Angiogenesis inhibitor|VEGFR inhibitor	KDR|ERBB2|NTRK1	-0.4445	15.6536	-1.3711
PF-05212384	MTOR inhibitor|PI3K inhibitor	MTOR|PIK3CA|PIK3CG	-0.4445	15.6536	-1.371
perhexiline	Carnitine palmitoyltransferase inhibitor	CPT1A|CPT2	-0.4445	15.6536	-1.371
PHA-848125	CDK inhibitor|Growth factor receptor inhibitor	CDK2|CDK4|NTRK1|CDK1|CDK5|CDK7	-0.4444	15.6536	-1.3708
belinostat	HDAC inhibitor	HDAC1|HDAC2|HDAC3|HDAC4|HDAC5|HDAC6|HDAC7|HDAC8|HDAC9|HDAC10|HDAC11	-0.4442	15.6536	-1.3702
doxorubicin	Topoisomerase inhibitor	TOP2A	-0.4441	15.6536	-1.3698
entinostat	HDAC inhibitor	HDAC1|HDAC2|HDAC3|HDAC9	-0.4441	15.6536	-1.3697
clofarabine	Ribonucleoside reductase inhibitor	RRM1|POLA1|RRM2|SLC22A8|POLD1|POLE|RRM2B	-0.444	15.6536	-1.3696
panobinostat	HDAC inhibitor	HDAC1|HDAC2|HDAC3|HDAC4|HDAC6|HDAC7|HDAC8|HDAC9	-0.444	15.6536	-1.3696
KN-62	Calcium channel blocker|Purinergic receptor antagonist	P2RX7|CAMK2A|AKT1|CHEK1|LCK|MAPK1|MAPK11|MAPK12|MAPK14|MAPK8|PRKCA|ROCK1|RPS6KB1|SGK1	-0.4439	15.6536	-1.3692
niclosamide	DNA inhibitor|STAT inhibitor	STAT3	-0.4438	15.6536	-1.3688
HMN-214	PLK inhibitor	FLT3|KDR|KIT|FLT4|PDGFRB|CSF1R|FLT1|RET|FGFR1|PDGFRA	-0.4438	15.6536	-1.3688
calcifediol	Vitamin D receptor agonist	VDR	-0.4437	15.6536	-1.3686
lomerizine	Calcium channel blocker	ABCB1|CACNA1B|SCN5A	-0.4437	15.6536	-1.3686
iodophenpropit	Histamine receptor antagonist	HRH3|HRH4|GRIN2B	-0.4436	15.6536	-1.3682
KIN001-127	ITK inhibitor	ITK	-0.4434	15.6536	-1.3678
BMS-265246	CDK inhibitor	CDK1|CDK2|CCNE1	-0.4433	15.6536	-1.3675
pitavastatin	HMGCR inhibitor	HMGCR|APOA1|CYP2C8	-0.4432	15.6536	-1.3672
purmorphamine	Smoothened receptor agonist	SMO|DHH|IHH|PTCH1	-0.443	15.6536	-1.3665
AZD-5438	CDK inhibitor	CCNB1|CCNE1|CDK1|CDK2|KCNH2	-0.4428	15.6536	-1.3657
QL-XI-92	DDR1 inhibitor	DDR1	-0.4426	15.6536	-1.3651
linifanib	PDGFR inhibitor|VEGFR inhibitor	CSF1R|KDR|PDGFRB|FLT1|FLT3|FLT4|PDGFRA|CSF1|KIT|RET|TEK	-0.4425	15.6536	-1.3649
benzamil	Sodium channel inhibitor	PKD2L1|SCNN1A|SCNN1B|SCNN1G|ASIC1|SCNN1D|SLC8A1	-0.4425	15.6536	-1.3648
fluvastatin	HMGCR inhibitor	HMGCR|CYP2C8	-0.4425	15.6536	-1.3648
alvespimycin	HSP inhibitor	HSP90AA1	-0.4424	15.6536	-1.3646
KN-93	Calcium channel blocker	CAMK2A	-0.4424	15.6536	-1.3646
NVP-TAE226	Protein tyrosine kinase inhibitor	IGF1R|PTK2	-0.4422	15.6536	-1.3641
RG-2833	HDAC inhibitor	HDAC1|HDAC3	-0.4421	15.6536	-1.3636
pelitinib	EGFR inhibitor	EGFR|ERBB2	-0.4419	15.6536	-1.3632
PF-03758309	P21 activated kinase inhibitor	PAK4	-0.4419	15.6536	-1.3631
PH-797804	P38 MAPK inhibitor	MAPK14|MAPK11	-0.4418	15.6536	-1.3628
GDC-0879	RAF inhibitor	BRAF	-0.4418	15.6536	-1.3627
AZD-1981	CRTH receptor antagonist	PTGDR2	-0.4417	15.6536	-1.3624
panobinostat	HDAC inhibitor	HDAC1|HDAC2|HDAC3|HDAC4|HDAC6|HDAC7|HDAC8|HDAC9	-0.4417	15.6536	-1.3623
bithionol	Autotaxin inhibitor	ESR1|ESR2|MCL1	-0.4417	15.6536	-1.3623
mitoxantrone	Topoisomerase inhibitor	TOP2A|PIM1	-0.4416	15.6536	-1.3622
VAMA-37	DNA inhibitor	PRKDC	-0.4416	15.6536	-1.3622
PF-04691502	MTOR inhibitor|PI3K inhibitor	MTOR|PIK3CA|PIK3CB|PIK3CD|PIK3CG	-0.4416	15.6536	-1.362
pyrimethamine	Dihydrofolate reductase inhibitor	DHFRP1|HEXA|STAT3|DHFR|SLC47A1	-0.4416	15.6536	-1.362
clofarabine	Ribonucleoside reductase inhibitor	RRM1|POLA1|RRM2|SLC22A8|POLD1|POLE|RRM2B	-0.4415	15.6536	-1.3619
daunorubicin	RNA synthesis inhibitor|Topoisomerase inhibitor	TOP2A|TOP2B	-0.4415	15.6536	-1.3618
AST-1306	EGFR inhibitor	EGFR|ERBB2|ERBB4	-0.4414	15.6536	-1.3616
endo-IWR-1	PARP inhibitor	TNKS|TNKS2	-0.4414	15.6536	-1.3614
BIBX-1382	EGFR inhibitor|Tyrosine kinase inhibitor	EGFR|ERBB2	-0.4413	15.6536	-1.3612
almitrine	Neurotransmitter agonist	ATP1A1	-0.4413	15.6536	-1.3611
TWS-119	GSK inhibitor	GSK3B|JUN|MYC	-0.4412	15.6536	-1.3608
trifluridine	DNA inhibitor|Thymidylate synthase inhibitor	TYMS	-0.4411	15.6536	-1.3606
SGI-1776	PIM inhibitor	PIM1|FLT3|PIM2|PIM3	-0.4411	15.6536	-1.3605
GR-127935	Serotonin receptor antagonist	HTR1B|HTR1D|HTR1A|HTR2A|HTR2C|HTR1E|HTR1F|HTR2B|HTR6	-0.4411	15.6536	-1.3605
ER-27319	Syk inhibitor	SYK	-0.4409	15.6536	-1.3601
oligomycin-c	ATP synthase inhibitor|ATPase inhibitor	ATP5A1	-0.4408	15.6536	-1.3598
panobinostat	HDAC inhibitor	HDAC1|HDAC2|HDAC3|HDAC4|HDAC6|HDAC7|HDAC8|HDAC9	-0.4408	15.6536	-1.3597
SU-11652	Tyrosine kinase inhibitor	KDR|PDGFRB	-0.4408	15.6536	-1.3597
IPI-145	PI3K inhibitor	PIK3CD|PIK3CG|PIK3CA|PIK3CB	-0.4407	15.6536	-1.3593
NSC-663284	CDC inhibitor	CDC25A|CDC25B|CDC25C	-0.4406	15.6536	-1.3592
XL-147	PI3K inhibitor	PIK3CG|PIK3CA|PIK3CD	-0.4406	15.6536	-1.3592
GSK-923295	Centromere associated protein inhibitor	CENPE	-0.4406	15.6536	-1.3592
JWE-035	Aurora kinase inhibitor	AURKA	-0.4406	15.6536	-1.3591
etoposide	Topoisomerase inhibitor	TOP2A|TOP2B|CYP2E1|CYP3A5	-0.4405	15.6536	-1.3587
K-858	Kinesin inhibitor	KIF11	-0.4405	15.6536	-1.3586
YM-155	Survivin inhibitor	BIRC5	-0.4404	15.6536	-1.3584
GR-127935	Serotonin receptor antagonist	HTR1B|HTR1D|HTR1A|HTR2A|HTR2C|HTR1E|HTR1F|HTR2B|HTR6	-0.4404	15.6536	-1.3583
cyclopiazonic-acid	ATPase inhibitor	ATP2A1	-0.4403	15.6536	-1.3582
pyrvinium-pamoate	Androgen receptor antagonist|AKT inhibitor	AR	-0.4403	15.6536	-1.3581
mycophenolate-mofetil	Inosine monophosphate dehydrogenase inhibitor|Dehydrogenase inhibitor|Hydroxycarboxylic acid receptor agonist|Immunosuppressant|Inositol monophosphatase inhibitor	IMPDH1|IMPDH2|HCAR2	-0.4402	15.6536	-1.3578
isoflupredone-acetate	Glucocorticoid receptor agonist	NR3C1	-0.4402	15.6536	-1.3577
gefitinib	EGFR inhibitor	EGFR|CYP2C19	-0.4401	15.6536	-1.3576
AZD-8055	MTOR inhibitor	MTOR	-0.4401	15.6536	-1.3574
PF-573228	Focal adhesion kinase inhibitor	CDK1|CDK2|CDK7|GSK3B|IKBKB	-0.44	15.6536	-1.3573
bisindolylmaleimide-ix	PKC inhibitor	SIRT1|LRRK2|SIRT2|AKT1|GSK3B|LCK|MAPK1|MAPK11|MAPK12|MAPK14|MAPK8|PRKCA|ROCK1|RPS6KB1	-0.4398	15.6536	-1.3567
I-BET-762	Bromodomain inhibitor	BRD2|BRD3|BRD4|APOA1	-0.4397	15.6536	-1.3564
TG-101209	JAK inhibitor	JAK2|JAK3	-0.4396	15.6536	-1.3561
alpelisib	PI3K inhibitor	PIK3CA|PIK3CB|PIK3CD|PIK3CG	-0.4396	15.6536	-1.3558
dovitinib	EGFR inhibitor|FGFR inhibitor|FLT3 inhibitor|PDGFR inhibitor|VEGFR inhibitor	FGFR1|FLT1|KDR|EGFR|FGFR3|FLT3|FLT4|KIT|PDGFRB|CSF1R|FGFR2|INSR|PDGFRA	-0.4395	15.6536	-1.3556
pitavastatin	HMGCR inhibitor	HMGCR|APOA1|CYP2C8	-0.4395	15.6536	-1.3555
TWS-119	GSK inhibitor	GSK3B|JUN|MYC	-0.4394	15.6536	-1.3553
tanespimycin	HSP inhibitor	HSP90AA1|CHEK1	-0.4392	15.6536	-1.3547
refametinib	MEK inhibitor	MAP2K1|MAP2K2	-0.4392	15.6536	-1.3546
JLK-6	Gamma secretase inhibitor|Beta amyloid inhibitor	PSEN1	-0.4389	15.6536	-1.3539
rebastinib	Bcr-Abl inhibitor|TIE tyrosine kinase inhibitor|VEGFR inhibitor	ABL1|BCR|FLT3|FGR|HCK|KDR|LYN|TEK|SRC	-0.4389	15.6536	-1.3537
GTP-14564	FLT3 inhibitor|Tyrosine kinase inhibitor	FLT3|CSF1R|KIT|PDGFRB	-0.4388	15.6536	-1.3535
amonafide	Topoisomerase inhibitor	TOP2A|TOP2B	-0.4387	15.6536	-1.3533
MLN-0128	MTOR inhibitor	MTOR|PIK3CA|PIK3CD|PIK3CG	-0.4387	15.6536	-1.3533
talazoparib	PARP inhibitor	PARP2|PARP1	-0.4387	15.6536	-1.3532
pyrvinium-pamoate	Androgen receptor antagonist|AKT inhibitor	AR	-0.4387	15.6536	-1.3532
dpn	Estrogen receptor agonist	ESR2	-0.4385	15.6536	-1.3526
GSK-1059615	PI3K inhibitor	PIK3CA|PIK3CG	-0.4384	15.6536	-1.3522
vorinostat	HDAC inhibitor	HDAC1|HDAC2|HDAC3|HDAC6|HDAC8|HDAC10|HDAC11|HDAC5|HDAC9	-0.4381	15.6536	-1.3514
saracatinib	Src inhibitor	SRC|ABL1|LCK|YES1	-0.4381	15.6536	-1.3513
auranofin	NFKB inhibitor	TXNRD1|TXNRD2|IKBKB|PRDX5|TRPA1	-0.4379	15.6536	-1.3508
protriptyline	Tricyclic antidepressant	SLC6A2|SLC6A4	-0.4379	15.6536	-1.3506
U-0126	MEK inhibitor	MAP2K1|MAP2K2|JAK2|AKT1|CHEK1|GSK3B|LCK|MAP2K7|MAPK1|MAPK11|MAPK12|MAPK14|MAPK8|PRKCA|RAF1|ROCK1|RPS6KB1|SGK1	-0.4378	15.6536	-1.3503
puromycin	Protein synthesis inhibitor	RPL10L|RPL11|RPL13A|RPL15|RPL19|RPL23|RPL23A|RPL26L1|RPL3|RPL37|RPL8|RSL24D1|SNU13	-0.4378	15.6536	-1.3503
entinostat	HDAC inhibitor	HDAC1|HDAC2|HDAC3|HDAC9	-0.4374	15.6536	-1.3492
pirarubicin	Topoisomerase inhibitor	TOP2A	-0.4374	15.6536	-1.3492
camptothecin	Topoisomerase inhibitor	TOP1|HIF1A	-0.4373	15.6536	-1.349
BRD-K08177763	MTOR inhibitor	MTOR|PTEN	-0.4373	15.6536	-1.3488
CYT-387	JAK inhibitor	JAK1|JAK2|JAK3	-0.4372	15.6536	-1.3486
BRD-K04923131	GSK inhibitor|Lipoxygenase inhibitor	GSK3B|ALOX5|GSK3A	-0.4371	15.6536	-1.3484
MLN-0128	MTOR inhibitor	MTOR|PIK3CA|PIK3CD|PIK3CG	-0.4372	15.6536	-1.3484
ZSTK-474	PI3K inhibitor	PIK3CG|PIK3CA|PIK3CB|PIK3CD	-0.437	15.6536	-1.3479
CAY-10470	NFKB inhibitor	NFKB1|TNF	-0.437	15.6536	-1.3479
AST-1306	EGFR inhibitor	EGFR|ERBB2|ERBB4	-0.4369	15.6536	-1.3478
BRD-K33396764	Omega 3 fatty acid stimulant	ELOVL4|FADS1|FADS2|FFAR1|FFAR4|PTGS2|SLC8A1|TRPV1	-0.437	15.6536	-1.3478
NSC-3852	HDAC inhibitor	HDAC1	-0.437	15.6536	-1.3478
CAY-10470	NFKB inhibitor	NFKB1|TNF	-0.4369	15.6536	-1.3476
SCH-79797	Proteasome inhibitor	F2R	-0.4369	15.6536	-1.3475
BRD-K04923131	GSK inhibitor|Lipoxygenase inhibitor	GSK3B|ALOX5|GSK3A	-0.4368	15.6536	-1.3474
refametinib	MEK inhibitor	MAP2K1|MAP2K2	-0.4368	15.6536	-1.3473
GSK-2334470	PDK inhibitor	PDPK1|AURKA|AURKB|PDK1	-0.4368	15.6536	-1.3473
BAY-61-3606	Syk inhibitor	SYK	-0.4367	15.6536	-1.347
valrubicin	DNA inhibitor|Topoisomerase inhibitor	TOP2A	-0.4367	15.6536	-1.347
selumetinib	MEK inhibitor	MAP2K1|MAP2K2	-0.4366	15.6536	-1.3467
PD-198306	MAP kinase inhibitor|MEK inhibitor	MAPK1|MAPK3|MAP2K1|MAP2K2	-0.4364	15.6536	-1.3462
masitinib	KIT inhibitor|PDGFR inhibitor|Src inhibitor	KIT|FGFR3|LYN|PDGFRB|PDGFRA	-0.4363	15.6536	-1.3459
sertindole	Dopamine receptor antagonist|Serotonin receptor antagonist	DRD2|HTR2A|HTR2C|ADRA1A|ADRA1B|ADRA1D|DRD3|DRD4|HRH1|HTR1A|HTR1B|HTR1D|HTR1E|HTR1F|HTR6|KCNH2	-0.4362	15.6536	-1.3454
levamisole	Acetylcholine receptor agonist	ALPL|ALPPL2|CHRNA3	-0.4358	15.6536	-1.3442
GDC-0068	AKT inhibitor	AKT1|AKT2|AKT3|CYP3A5|PRKG1	-0.4358	15.6536	-1.3442
topotecan	Topoisomerase inhibitor	TOP1|TOP1MT	-0.4358	15.6536	-1.3442
palbociclib	CDK inhibitor	CDK4|CDK6|CCND3	-0.4355	15.6536	-1.3433
BGT-226	PI3K inhibitor	MTOR|PIK3CG|PIK3CA|PIK3CB	-0.4355	15.6536	-1.3433
DBeQ	ATPase inhibitor	CASP3	-0.4354	15.6536	-1.3431
JNJ-7706621	CDK inhibitor	CDK1|CDK2|AURKA|AURKB	-0.4354	15.6536	-1.343
MK-8245	Stearoyl-CoA desaturase inhibitor	SCD	-0.4352	15.6536	-1.3425
BMS-777607	AXL kinase inhibitor|FLT3 inhibitor|HGF receptor inhibitor|Macrophage inhibitor|MET inhibitor|Tyrosine kinase inhibitor	MET|AXL|MERTK|MST1R|TYRO3|FLT3	-0.4352	15.6536	-1.3423
parbendazole	Tubulin inhibitor	TUBB	-0.4352	15.6536	-1.3423
idelalisib	PI3K inhibitor	PIK3CD|PIK3CG|CCL3|CCL4|PIK3CA|PIK3CB	-0.4351	15.6536	-1.3421
droxinostat	HDAC inhibitor	HDAC6|HDAC8	-0.4349	15.6536	-1.3414
rebastinib	Bcr-Abl inhibitor|TIE tyrosine kinase inhibitor|VEGFR inhibitor	ABL1|BCR|FLT3|FGR|HCK|KDR|LYN|TEK|SRC	-0.4348	15.6536	-1.3413
importazole	Importin inhibitor	KPNB1	-0.4347	15.6536	-1.3409
A-443654	AKT inhibitor	AKT1|AKT2	-0.4347	15.6536	-1.3408
everolimus	MTOR inhibitor	MTOR|CYP3A5|FKBP1A	-0.4347	15.6536	-1.3408
AZD-9291	EGFR inhibitor	EGFR	-0.4346	15.6536	-1.3407
NNC-55-0396	Calcium channel blocker	CATSPER1|CATSPER2|CATSPER3|CATSPER4	-0.4345	15.6536	-1.3403
SB-271046	Serotonin receptor antagonist	HTR6	-0.4345	15.6536	-1.3403
suvorexant	Orexin receptor antagonist	HCRTR1|HCRTR2	-0.4345	15.6536	-1.3403
quiflapon	Leukotriene inhibitor	ALOX5AP|ALOX5	-0.4344	15.6536	-1.34
amsacrine	Topoisomerase inhibitor	TOP2A|KCNH2	-0.4344	15.6536	-1.34
PP-2	Src inhibitor	SRC|LCK|ABL1|LYN|RIPK2	-0.4344	15.6536	-1.3399
BI-D1870	Ribosomal protein inhibitor	RPS6KA1|RPS6KA2|RPS6KA3|RPS6KA6	-0.4343	15.6536	-1.3398
CD-437	Retinoid receptor agonist	RARG	-0.4343	15.6536	-1.3397
cilengitide	Integrin inhibitor	ITGAV|ITGB3|ITGB5	-0.4343	15.6536	-1.3395
DDR1-IN-1	Discoidin domain receptor inhibitor	DDR1|DDR2	-0.4342	15.6536	-1.3394
GANT-61	GLI antagonist	DHH|IHH|GLI1|GLI2	-0.434	15.6536	-1.3387
roscovitine	CDK inhibitor	CDK2|CDK9|CDK7|CDK1|CDK5	-0.4339	15.6536	-1.3385
methylene-blue	Nitric oxide production inhibitor|Guanylyl cyclase inhibitor|Monoamine oxidase inhibitor|Tau aggregation inhibitor	ACHE|MAPT	-0.4339	15.6536	-1.3384
cabazitaxel	Tubulin inhibitor	CYP2C8|CYP3A5|SLCO1B3|TUBA4A|TUBB|TUBB1	-0.4338	15.6536	-1.3382
GW-405833	Cannabinoid receptor agonist	CNR2	-0.4338	15.6536	-1.338
palbociclib	CDK inhibitor	CDK4|CDK6|CCND3	-0.4338	15.6536	-1.338
flubendazole	Tubulin inhibitor	TUBB	-0.4338	15.6536	-1.338
R-428	AXL kinase inhibitor	AXL	-0.4337	15.6536	-1.3377
SB-590885	RAF inhibitor	BRAF	-0.4336	15.6536	-1.3373
AT-13387	HSP inhibitor	HSP90AA1	-0.4333	15.6536	-1.3367
metergoline	Dopamine receptor agonist|Serotonin receptor antagonist	HTR2A|DRD2|HTR1A|HTR1B|HTR1D|HTR1E|HTR1F|HTR2B|HTR2C|HTR5A|HTR6|HTR7	-0.4334	15.6536	-1.3367
palbociclib	CDK inhibitor	CDK4|CDK6|CCND3	-0.4333	15.6536	-1.3366
devazepide	CCK receptor antagonist	CCKAR	-0.4333	15.6536	-1.3365
TPCA-1	IKK inhibitor	IKBKB	-0.4332	15.6536	-1.3363
PKI-179	MTOR inhibitor|PI3K inhibitor	MTOR	-0.4331	15.6536	-1.3358
GDC-0941	PI3K inhibitor	PIK3CG|PIK3CA|PIK3CB|PIK3CD	-0.433	15.6536	-1.3357
apicidin	HDAC inhibitor	HDAC1|HDAC2|HDAC3|HDAC8|HDAC10|HDAC11|HDAC4|HDAC5|HDAC6|HDAC7|HDAC9	-0.433	15.6536	-1.3356
KU-0063794	MTOR inhibitor	MTOR	-0.433	15.6536	-1.3356
ixazomib	Proteasome inhibitor	PSMB1	-0.433	15.6536	-1.3355
telbivudine	DNA inhibitor	TK2	-0.4329	15.6536	-1.3353
docetaxel	Tubulin inhibitor	TUBB|BCL2|MAP2|MAP4|MAPT|NR1I2|TUBB1	-0.4329	15.6536	-1.3353
U-0126	MEK inhibitor	MAP2K1|MAP2K2|JAK2|AKT1|CHEK1|GSK3B|LCK|MAP2K7|MAPK1|MAPK11|MAPK12|MAPK14|MAPK8|PRKCA|RAF1|ROCK1|RPS6KB1|SGK1	-0.4328	15.6536	-1.3351
tioconazole	Sterol demethylase inhibitor	CYP51A1	-0.4328	15.6536	-1.3349
zileuton	Leukotriene inhibitor|Lipoxygenase inhibitor	ALOX5	-0.4327	15.6536	-1.3348
dipyridamole	Phosphodiesterase inhibitor	PDE5A|ADA|PDE10A|PDE4A|PDE7B|PDE8A|PDE8B|SLC29A1|PDE1A|PDE1B|PDE1C|PDE2A|PDE3A|PDE3B|PDE4B|PDE4C|PDE4D|PDE6A|PDE6B|PDE6C|PDE6D|PDE6G|PDE6H|PDE7A|PDE9A	-0.4327	15.6536	-1.3348
importazole	Importin inhibitor	KPNB1	-0.4327	15.6536	-1.3346
ezetimibe	Cholesterol inhibitor|Niemann-Pick C1-like 1 protein antagonist	NPC1L1|ANPEP|SOAT1	-0.4327	15.6536	-1.3346
rigosertib	Cell cycle inhibitor|PLK inhibitor	PLK1|MCL1	-0.4326	15.6536	-1.3343
C-646	Histone acetyltransferase inhibitor	EP300	-0.4325	15.6536	-1.3342
ingenol-mebutate	PKC activator	PRKCD|PRKCA|PRKCB|PRKCE|PRKCG	-0.4324	15.6536	-1.3338
malonoben	Protein tyrosine kinase inhibitor	EGFR	-0.4323	15.6536	-1.3336
PHA-793887	CDK inhibitor	CDK1|CDK2|CDK4|CDK5|CCND1|CCNE1|CDK7|CDK9	-0.4324	15.6536	-1.3336
SB-2343	MTOR inhibitor|PI3K inhibitor	MTOR|PIK3CA|PIK3CB|PIK3CD|PIK3CG	-0.4324	15.6536	-1.3336
GDC-0941	PI3K inhibitor	PIK3CG|PIK3CA|PIK3CB|PIK3CD	-0.4323	15.6536	-1.3335
SB-2343	MTOR inhibitor|PI3K inhibitor	MTOR|PIK3CA|PIK3CB|PIK3CD|PIK3CG	-0.4323	15.6536	-1.3334
SID-26681509	Cathepsin inhibitor	CTSL	-0.4322	15.6536	-1.3332
metronidazole	Bacterial DNA inhibitor	CYP2C8|CYP2E1|CYP3A5|CYP3A7|CYP2C9|CYP3A4	-0.4322	15.6536	-1.3331
dacinostat	HDAC inhibitor	HDAC1|HDAC2|HDAC3|HDAC4|HDAC5|HDAC6|HDAC7|HDAC8|HDAC9	-0.4322	15.6536	-1.3331
scriptaid	HDAC inhibitor	HDAC1|HDAC2|HDAC3|HDAC4|HDAC5|HDAC6|HDAC7|HDAC8|HDAC9	-0.4321	15.6536	-1.333
CP-945598	Cannabinoid receptor antagonist	CNR1	-0.4321	15.6536	-1.3328
SB-2343	MTOR inhibitor|PI3K inhibitor	MTOR|PIK3CA|PIK3CB|PIK3CD|PIK3CG	-0.4321	15.6536	-1.3327
SB-258585	Serotonin receptor antagonist	HTR6	-0.432	15.6536	-1.3325
SB-218078	CHK inhibitor	CHEK1	-0.432	15.6536	-1.3325
voxtalisib	MTOR inhibitor|PI3K inhibitor	MTOR|PIK3CA	-0.432	15.6536	-1.3325
etoposide	Topoisomerase inhibitor	TOP2A|TOP2B|CYP2E1|CYP3A5	-0.4319	15.6536	-1.3322
trifluoperazine	Dopamine receptor antagonist	DRD2|ABCG2|CAMK2A|SCN4A|SCN9A|ADRA1A|CALM1|CALY|DRD4|HRH1|HTR2A|HTR2C|S100A4|TNNC1	-0.4319	15.6536	-1.3321
JNJ-26481585	HDAC inhibitor	HDAC1|HDAC10|HDAC11|HDAC2|HDAC3|HDAC4|HDAC5|HDAC6|HDAC7|HDAC8|HDAC9|MDM2	-0.4319	15.6536	-1.3321
PF-03814735	Aurora kinase inhibitor	AURKA|AURKB	-0.4317	15.6536	-1.3316
ryuvidine	Histone lysine methyltransferase inhibitor	CDK4|CDK2	-0.4317	15.6536	-1.3316
anisomycin	DNA inhibitor	RPL10L|RPL11|RPL13A|RPL15|RPL19|RPL23|RPL23A|RPL26L1|RPL3|RPL37|RPL8|RSL24D1|SNU13	-0.4317	15.6536	-1.3315
mepacrine	NFKB inhibitor|Cytokine production inhibitor|p53 activator	TP53|AKT1|MTOR|NFKB1|PLA2G2A|PLA2G2D|PLA2G1B|PLA2G4A|PLA2G6|PLCL1	-0.4316	15.6536	-1.3313
gitoxigenin	Na/K-ATPase inhibitor	ATP1A1	-0.4315	15.6536	-1.331
amonafide	Topoisomerase inhibitor	TOP2A|TOP2B	-0.4315	15.6536	-1.3309
romidepsin	HDAC inhibitor	HDAC1|HDAC2|CYP2B6|CYP2C19|CYP3A5|HDAC3|HDAC4|HDAC5|HDAC6|HDAC7|HDAC8|HDAC9	-0.4315	15.6536	-1.3308
QS-11	ARFGAP inhibitor	ARFGAP1	-0.4313	15.6536	-1.3304
BS-181	CDK inhibitor	CDK7	-0.4313	15.6536	-1.3303
AZD-2014	MTOR inhibitor	MTOR	-0.4313	15.6536	-1.3302
SCH-79797	Proteasome inhibitor	F2R	-0.4311	15.6536	-1.3298
ingenol-mebutate	PKC activator	PRKCD|PRKCA|PRKCB|PRKCE|PRKCG	-0.431	15.6536	-1.3295
PHA-665752	MET inhibitor	MET	-0.431	15.6536	-1.3294
LY-294002	MTOR inhibitor|DNA dependent protein kinase inhibitor|Phosphodiesterase inhibitor|PLK inhibitor	MTOR|PIK3CD|PIK3CG|PIK3CA|PLK1|PRKDC|PIK3CB|PDE2A|AKT1|CHEK1|GSK3B|LCK|MAPK1|MAPK11|MAPK12|MAPK14|MAPK8|PRKCA|ROCK1|RPS6KB1|SGK1	-0.4309	15.6536	-1.3293
PRT-062607	Syk inhibitor	SYK|FGR|MAP3K9	-0.431	15.6536	-1.3293
DPI-201106	Sodium channel activator	ADRB2	-0.4309	15.6536	-1.329
acenocoumarol	Vitamin K antagonist	VKORC1	-0.4307	15.6536	-1.3285
everolimus	MTOR inhibitor	MTOR|CYP3A5|FKBP1A	-0.4307	15.6536	-1.3284
BML-259	CDK inhibitor	CDK2|CDK5	-0.4306	15.6536	-1.3283
LY-2090314	GSK inhibitor	GSK3B	-0.4306	15.6536	-1.3282
STA-5326	Interleukin inhibitor	IL12A|IL12B|IL12RB1|IL12RB2|IL23A	-0.4306	15.6536	-1.3281
amiodarone	Potassium channel antagonist	KCNH2|CHRM3|CYP2C8|SCN5A|ADRB1|CACNA1H|CACNA2D2|KCNA7	-0.4305	15.6536	-1.328
doxifluridine	Thymidylate synthase inhibitor	TYMS	-0.4305	15.6536	-1.3279
bortezomib	NFKB inhibitor|Proteasome inhibitor	PSMB5|PSMB1|PSMB2|CASP3|CYP2C19|NFKB1|PSMA1|PSMA2|PSMA3|PSMA4|PSMA5|PSMA6|PSMA7|PSMA8|PSMB10|PSMB11|PSMB3|PSMB4|PSMB6|PSMB7|PSMB8|PSMB9|PSMD1|PSMD2|RELA	-0.4305	15.6536	-1.3278
artemether	Antimalarial	CYP2B6|CYP2C19|CYP3A5|ATP1A1	-0.4304	15.6536	-1.3276
I-BET-762	Bromodomain inhibitor	BRD2|BRD3|BRD4|APOA1	-0.4304	15.6536	-1.3275
SB-939	HDAC inhibitor	HDAC1|HDAC2|HDAC10|HDAC3|HDAC4|HDAC5|HDAC9	-0.4303	15.6536	-1.3273
bosutinib	Src inhibitor|Abl inhibitor|Bcr-Abl inhibitor	ABL1|SRC|BCR|LYN|CAMK2G|HCK|CAMK1D|CDK2|FRK|FYN|MAP2K1|MAP2K2|MAP3K2|MAP4K5|STK10|STK24|STK4|TNK2|TXK	-0.4302	15.6536	-1.3271
CGS-15943	Adenosine receptor antagonist	ADORA1|ADORA2A|ADORA2B|ADORA3	-0.4302	15.6536	-1.327
PF-04691502	MTOR inhibitor|PI3K inhibitor	MTOR|PIK3CA|PIK3CB|PIK3CD|PIK3CG	-0.4301	15.6536	-1.3268
veliparib	PARP inhibitor	PARP1|PARP2	-0.4301	15.6536	-1.3267
idarubicin	Topoisomerase inhibitor	TOP2A	-0.4301	15.6536	-1.3266
orlistat	Lipase inhibitor	PNLIP|FASN|LIPF|DAGLA|CNR1|DAGLB	-0.4301	15.6536	-1.3266
Y-134	Estrogen receptor antagonist	ESR1|ESR2	-0.43	15.6536	-1.3264
AZD-5438	CDK inhibitor	CCNB1|CCNE1|CDK1|CDK2|KCNH2	-0.43	15.6536	-1.3264
ponatinib	Bcr-Abl inhibitor|FLT3 inhibitor|PDGFR inhibitor	ABL1|BCR|FLT3|RET|FGFR1|FGFR2|FGFR3|FGFR4|KIT|TEK|CYP2C8|CYP3A5|FGF2|FLT1|KDR|LCK|LYN|PDGFRA|SRC	-0.43	15.6536	-1.3264
TG-101209	JAK inhibitor	JAK2|JAK3	-0.4299	15.6536	-1.3262
RITA	MDM inhibitor	MDM2|TXNRD1|TXNRD2	-0.4299	15.6536	-1.326
disulfiram	Aldehyde dehydrogenase inhibitor|DNA methyltransferase inhibitor|TRPV agonist	ALDH2|ALDH1A2|ALDH5A1|ALDH7A1|CYP2E1|DNMT1|TRPA1|DBH	-0.4299	15.6536	-1.326
palbociclib	CDK inhibitor	CDK4|CDK6|CCND3	-0.4298	15.6536	-1.3259
adarotene	Retinoid receptor agonist	RARG|RARA|RARB	-0.4298	15.6536	-1.3258
SSR-69071	Leukocyte elastase inhibitor	ELANE	-0.4298	15.6536	-1.3258
GSK-J4	Histone lysine demethylase inhibitor	KDM6A|KDM6B|TNF	-0.4298	15.6536	-1.3257
thapsigargin	ATPase inhibitor	ATP2A1	-0.4298	15.6536	-1.3256
PF-04457845	FAAH inhibitor	FAAH	-0.4297	15.6536	-1.3254
ribavirin	Antiviral	IMPDH1|ADK|ENPP1|IMPDH2|NT5C2	-0.4296	15.6536	-1.3251
bindarit	NFKB inhibitor	CCL2|CCL7|CCL8	-0.4296	15.6536	-1.3251
VAMA-37	DNA inhibitor	PRKDC	-0.4295	15.6536	-1.3249
floxuridine	DNA synthesis inhibitor	TYMS	-0.4294	15.6536	-1.3244
Ro-4987655	MEK inhibitor	MAP2K1	-0.4293	15.6536	-1.3243
darapladib	Phospholipase inhibitor	PLA2G7	-0.4293	15.6536	-1.3242
BRD-K65592642	Gamma secretase inhibitor	PSEN1	-0.4293	15.6536	-1.3242
epirubicin	Topoisomerase inhibitor	TOP2A|CHD1	-0.4292	15.6536	-1.3239
SCH-79797	Proteasome inhibitor	F2R	-0.429	15.6536	-1.3234
netupitant	Tachykinin antagonist	TACR1	-0.429	15.6536	-1.3232
A-443654	AKT inhibitor	AKT1|AKT2	-0.4289	15.6536	-1.3229
moxifloxacin	Bacterial DNA inhibitor	TOP2A	-0.4288	15.6536	-1.3228
SEW-2871	Lysophospholipid receptor agonist	S1PR1	-0.4288	15.6536	-1.3227
LDN-212854	Bone resorption inhibitor	ABL1|ACVR1|RIPK2|ACVRL1	-0.4287	15.6536	-1.3224
paroxetine	Selective serotonin reuptake inhibitor (SSRI)	SLC6A4|CHRM1|CHRM2|CHRM3|CHRM4|CHRM5|HTR2A|SLC6A2	-0.4286	15.6536	-1.3222
GR-159897	Tachykinin antagonist	TACR2|TAC1	-0.4286	15.6536	-1.3221
SCH-79797	Proteasome inhibitor	F2R	-0.4285	15.6536	-1.3218
ryuvidine	Histone lysine methyltransferase inhibitor	CDK4|CDK2	-0.4285	15.6536	-1.3218
palbociclib	CDK inhibitor	CDK4|CDK6|CCND3	-0.4285	15.6536	-1.3218
PHA-793887	CDK inhibitor	CDK1|CDK2|CDK4|CDK5|CCND1|CCNE1|CDK7|CDK9	-0.4285	15.6536	-1.3216
torin-1	MTOR inhibitor|PI3K inhibitor	MTOR|PIK3CA	-0.4284	15.6536	-1.3214
GDC-0980	MTOR inhibitor|PI3K inhibitor	MTOR|PIK3CG|FGR|MAP3K9|PIK3CA|PIK3CB|PIK3CD|SYK	-0.4282	15.6536	-1.3209
perphenazine	Dopamine receptor antagonist	DRD2|CALM1|DRD1|HRH1|HTR2A|HTR2C|HTR6|HTR7	-0.4281	15.6536	-1.3205
cediranib	VEGFR inhibitor|KIT inhibitor	KDR|FLT1|FLT4|KIT|PDGFRB|CSF1R|FLT3|PDGFRA	-0.4281	15.6536	-1.3204
mevastatin	HMGCR inhibitor	HMGCR	-0.4279	15.3525	-1.32
PF-03758309	P21 activated kinase inhibitor	PAK4	-0.4279	15.3525	-1.3198
asiatic-acid	Apoptosis stimulant	PYGM	-0.4278	15.3525	-1.3195
BVT-948	Tyrosine phosphatase inhibitor	PTPN1|PTPN11|PTPN2	-0.4277	15.3525	-1.3194
lapatinib	EGFR inhibitor|ERBB2 inhibitor	EGFR|ERBB2|CYP3A5	-0.4276	15.3525	-1.319
gefitinib	EGFR inhibitor	EGFR|CYP2C19	-0.4276	15.3525	-1.3189
CGS-15943	Adenosine receptor antagonist	ADORA1|ADORA2A|ADORA2B|ADORA3	-0.4276	15.3525	-1.3189
SB-2343	MTOR inhibitor|PI3K inhibitor	MTOR|PIK3CA|PIK3CB|PIK3CD|PIK3CG	-0.4274	15.3525	-1.3185
mitoxantrone	Topoisomerase inhibitor	TOP2A|PIM1	-0.4274	15.3525	-1.3184
SB-743921	Kinesin inhibitor	KIF11	-0.4274	15.3525	-1.3184
etoposide	Topoisomerase inhibitor	TOP2A|TOP2B|CYP2E1|CYP3A5	-0.4274	15.3525	-1.3184
rociletinib	EGFR inhibitor	EGFR	-0.4272	15.3525	-1.3178
copanlisib	PI3K inhibitor	PIK3CA|PIK3CD|PIK3CB|PIK3CG	-0.4271	15.3525	-1.3174
KU-0060648	DNA inhibitor|PI3K inhibitor	PIK3CA|PIK3CB|PIK3CD|PRKDC	-0.4271	15.3525	-1.3173
BRD-K72541103	JAK inhibitor	JAK3	-0.427	15.3525	-1.317
deguelin	NADPH inhibitor	AKT1	-0.427	15.3525	-1.317
camptothecin	Topoisomerase inhibitor	TOP1|HIF1A	-0.427	15.3525	-1.317
bisindolylmaleimide-ix	PKC inhibitor	SIRT1|LRRK2|SIRT2|AKT1|GSK3B|LCK|MAPK1|MAPK11|MAPK12|MAPK14|MAPK8|PRKCA|ROCK1|RPS6KB1	-0.427	15.3525	-1.317
PQ-401	IGF-1 inhibitor	IGF1R	-0.4268	15.3525	-1.3166
ZK-164015	Estrogen receptor antagonist	ESR1|ESR2	-0.4268	15.3525	-1.3165
everolimus	MTOR inhibitor	MTOR|CYP3A5|FKBP1A	-0.4266	15.3525	-1.3157
masitinib	KIT inhibitor|PDGFR inhibitor|Src inhibitor	KIT|FGFR3|LYN|PDGFRB|PDGFRA	-0.4266	15.3525	-1.3157
clofarabine	Ribonucleoside reductase inhibitor	RRM1|POLA1|RRM2|SLC22A8|POLD1|POLE|RRM2B	-0.4264	15.3525	-1.3153
GW-5074	RAF inhibitor|LRRK inhibitor	RAF1|LRRK1|LRRK2|NTRK1	-0.4264	15.3525	-1.3153
aripiprazole	Serotonin receptor agonist|Serotonin receptor antagonist	DRD2|HTR1A|HTR2A|HRH1|HTR1B|HTR1D|HTR2C|ADRA1A|ADRA1B|ADRA2A|ADRA2B|ADRA2C|CHRM1|CHRM2|CHRM3|CHRM4|CHRM5|DRD1|DRD3|DRD4|DRD5|HTR1E|HTR3A|HTR6|HTR7	-0.4264	15.3525	-1.3152
ACY-1215	HDAC inhibitor	HDAC6|HDAC1|HDAC2|HDAC3|HDAC8	-0.4263	15.3525	-1.3149
teniposide	Topoisomerase inhibitor	TOP2A|CYP3A5|TOP2B	-0.426	15.3525	-1.3139
purvalanol-a	CDK inhibitor|DYRK inhibitor	CDK1|CDK2|CDK4|CDK5|CCND1|CCNE1|CSNK1G3|RPS6KA1|SRC	-0.4258	15.3525	-1.3135
KPT-330	Exportin antagonist	XPO1	-0.4258	15.3525	-1.3134
dovitinib	EGFR inhibitor|FGFR inhibitor|FLT3 inhibitor|PDGFR inhibitor|VEGFR inhibitor	FGFR1|FLT1|KDR|EGFR|FGFR3|FLT3|FLT4|KIT|PDGFRB|CSF1R|FGFR2|INSR|PDGFRA	-0.4257	15.3525	-1.3131
NVP-TAE684	ALK inhibitor	ALK|INSR	-0.4256	15.3525	-1.3127
BIBR-1532	Telomerase inhibitor	TERT	-0.4255	15.3525	-1.3126
pimozide	Dopamine receptor antagonist	DRD2|DRD3|HTR2A|CACNA1I|CALM1|DRD1|DRD4|DRD5|HRH1|HTR1A|KCNA10|KCNH2	-0.4254	15.3525	-1.3123
isamoltane	Adrenergic receptor antagonist	ADRB1|ADRB2|HTR1A|HTR1B	-0.4255	15.3525	-1.3123
BRD-K28761384	Dopamine receptor antagonist	DRD2|DRD1|ADRA1A|ADRA2A|DRD5|HRH1|HTR2A	-0.4253	15.3525	-1.3119
KI-8751	VEGFR inhibitor|KIT inhibitor|PDGFR inhibitor	KDR	-0.4253	15.3525	-1.3119
IKK-16	IKK inhibitor	IKBKB	-0.4252	15.3525	-1.3116
BIX-01294	DNA inhibitor|Histone lysine methyltransferase inhibitor	EHMT2|EHMT1	-0.4252	15.3525	-1.3115
rifaximin	RNA synthesis inhibitor	NR1I2|CYP3A4	-0.4251	15.3525	-1.3113
buparlisib	PI3K inhibitor	PIK3CA|PIK3CG	-0.4251	15.3525	-1.3111
SCH-79797	Proteasome inhibitor	F2R	-0.425	15.3525	-1.311
KIN001-127	ITK inhibitor	ITK	-0.4249	15.3525	-1.3106
ONO-4059	BTK inhibitor	BTK	-0.4247	15.3525	-1.3101
teniposide	Topoisomerase inhibitor	TOP2A|CYP3A5|TOP2B	-0.4247	15.3525	-1.31
canertinib	EGFR inhibitor	EGFR|ERBB2|ERBB4|AKT1	-0.4247	15.3525	-1.3099
KPT-330	Exportin antagonist	XPO1	-0.4247	15.3525	-1.3099
WYE-125132	MTOR inhibitor	MTOR|PIK3CA	-0.4246	15.3525	-1.3098
PI-103	PI3K inhibitor|MTOR inhibitor	PIK3CA|PIK3CG|MTOR|PIK3CB|PIK3CD|PRKDC	-0.4245	15.3525	-1.3094
palbociclib	CDK inhibitor	CDK4|CDK6|CCND3	-0.4243	15.3525	-1.3088
lavendustin-c	EGFR inhibitor	CAMK2A|EGFR|SRC	-0.4243	15.3525	-1.3087
bosutinib	Src inhibitor|Abl inhibitor|Bcr-Abl inhibitor	ABL1|SRC|BCR|LYN|CAMK2G|HCK|CAMK1D|CDK2|FRK|FYN|MAP2K1|MAP2K2|MAP3K2|MAP4K5|STK10|STK24|STK4|TNK2|TXK	-0.4243	15.3525	-1.3087
alvocidib	CDK inhibitor	CDK2|CDK4|CDK1|CDK6|CDK7|CDK9|CDK5|CDK8|EGFR|PYGM|BCL2|BIRC5|CCNT1|MCL1|XIAP	-0.4243	15.3525	-1.3087
manumycin-a	Farnesyltransferase inhibitor|NFKB inhibitor	FNTA|IKBKB	-0.4242	15.3525	-1.3086
phentermine	Dopamine receptor antagonist|Serotonin reuptake inhibitor	SLC6A2|MAOA|MAOB|SLC6A3|SLC6A4	-0.4243	15.3525	-1.3086
niguldipine	Adrenergic receptor antagonist|Calcium channel blocker	ADRA1A|CACNA1C	-0.4242	15.3525	-1.3084
EPZ-5676	DOT1L inhibitor	DOT1L	-0.4241	15.3525	-1.3081
PJ-34	PARP inhibitor	EEF2|PARP1|PARP15|PARP3	-0.4241	15.3525	-1.3081
vortioxetine	Serotonin receptor agonist|Serotonin receptor antagonist	HTR1A|HTR1B|HTR7|SLC6A4|HTR1D|CYP2B6|CYP2C19|CYP2C8|CYP3A5|HTR2A|HTR2C|HTR3A|HTR5A|HTR6	-0.424	15.3525	-1.3079
simvastatin	HMGCR inhibitor	HMGCR|CYP2C8|CYP3A4|CYP3A5|ITGB2	-0.424	15.3525	-1.3077
VAMA-37	DNA inhibitor	PRKDC	-0.4238	15.3525	-1.3074
calcifediol	Vitamin D receptor agonist	VDR	-0.4239	15.3525	-1.3074
cerivastatin	HMGCR inhibitor	HMGCR	-0.4238	15.3525	-1.3072
TAK-285	EGFR inhibitor	ERBB2|EGFR	-0.4238	15.3525	-1.3071
oleoylethanolamide	Cannabinoid receptor agonist|Glucose dependent insulinotropic receptor agonist|Potassium channel blocker|PPAR receptor agonist	GPR119|PPARA|KCND3|CNR1|GPR55	-0.4237	15.3525	-1.3068
AZD-2014	MTOR inhibitor	MTOR	-0.4237	15.3525	-1.3068
SB-939	HDAC inhibitor	HDAC1|HDAC2|HDAC10|HDAC3|HDAC4|HDAC5|HDAC9	-0.4236	15.3525	-1.3067
bortezomib	NFKB inhibitor|Proteasome inhibitor	PSMB5|PSMB1|PSMB2|CASP3|CYP2C19|NFKB1|PSMA1|PSMA2|PSMA3|PSMA4|PSMA5|PSMA6|PSMA7|PSMA8|PSMB10|PSMB11|PSMB3|PSMB4|PSMB6|PSMB7|PSMB8|PSMB9|PSMD1|PSMD2|RELA	-0.4236	15.3525	-1.3065
SB-2343	MTOR inhibitor|PI3K inhibitor	MTOR|PIK3CA|PIK3CB|PIK3CD|PIK3CG	-0.4236	15.3525	-1.3065
TG-101348	JAK inhibitor|FLT3 inhibitor	JAK2|FLT3|RET|BRD4|JAK1|JAK3|TYK2	-0.4235	15.3525	-1.3063
trifluoperazine	Dopamine receptor antagonist	DRD2|ABCG2|CAMK2A|SCN4A|SCN9A|ADRA1A|CALM1|CALY|DRD4|HRH1|HTR2A|HTR2C|S100A4|TNNC1	-0.4235	15.3525	-1.3062
quiflapon	Leukotriene inhibitor	ALOX5AP|ALOX5	-0.4234	15.3525	-1.306
apixaban	Coagulation factor inhibitor	F10|CYP2C19|CYP2C8|CYP2J2	-0.4234	15.3525	-1.3059
flunisolide	Cytochrome P450 inhibitor	NR3C1	-0.4233	15.3525	-1.3058
AP-26113	ALK inhibitor	ALK|EGFR	-0.4233	15.3525	-1.3056
calcipotriol	Vitamin D receptor agonist	VDR	-0.4232	15.3525	-1.3054
LY-303511	Casein kinase inhibitor|PI3K inhibitor	CSNK2A1|CSNK2A2|CSNK2B|MTOR|BRD2|BRD3|BRD4	-0.4231	15.3525	-1.3051
triclosan	Enoyl-[acyl-carrier-protein] reductase [NADH] inhibitor	DNMT1	-0.423	15.3525	-1.3048
staurosporine	PKC inhibitor	CDK2|GSK3B	-0.423	15.3525	-1.3048
pyrvinium-pamoate	Androgen receptor antagonist|AKT inhibitor	AR	-0.423	15.3525	-1.3048
BRD-K07303502	Cytosolic phospholipase inhibitor	PLA2G4A	-0.4229	15.3525	-1.3045
AZD-8055	MTOR inhibitor	MTOR	-0.4229	15.3525	-1.3044
GSK-1070916	Aurora kinase inhibitor	AURKB|AURKC|AURKA|CYP2D6|CYP3A4	-0.4229	15.3525	-1.3044
vorinostat	HDAC inhibitor	HDAC1|HDAC2|HDAC3|HDAC6|HDAC8|HDAC10|HDAC11|HDAC5|HDAC9	-0.4228	15.3525	-1.3043
dexniguldipine	Calmodulin inhibitor	CALM1|PRKCA|ADORA3	-0.4228	15.3525	-1.3042
erlotinib	EGFR inhibitor	EGFR|NR1I2	-0.4227	15.3525	-1.3038
cytochalasin-d	Tubulin inhibitor	ACTA1	-0.4226	15.3525	-1.3035
taselisib	PI3K inhibitor	PIK3CA|PIK3CB|PIK3CD|PIK3CG	-0.4226	15.3525	-1.3035
epirubicin	Topoisomerase inhibitor	TOP2A|CHD1	-0.4225	15.3525	-1.3031
CYT-997	Tubulin inhibitor	TUBB	-0.4224	15.3525	-1.303
amuvatinib	FLT3 inhibitor|KIT inhibitor|PDGFR inhibitor|RAD51 inhibitor|RET tyrosine kinase inhibitor	KIT|FLT3|MET|PDGFRA|AXL|MST1R|RAD51|RET	-0.4224	15.3525	-1.303
PD-173074	FGFR inhibitor|VEGFR inhibitor	FGFR1|FGFR3|FGFR2|FGFR4|FLT1|FLT4|KDR|PDGFRA|PDGFRB	-0.4224	15.3525	-1.303
PF-04691502	MTOR inhibitor|PI3K inhibitor	MTOR|PIK3CA|PIK3CB|PIK3CD|PIK3CG	-0.4223	15.3525	-1.3027
lonafarnib	Farnesyltransferase inhibitor	FNTA|HRAS|KRAS|NRAS	-0.4223	15.3525	-1.3026
sertindole	Dopamine receptor antagonist|Serotonin receptor antagonist	DRD2|HTR2A|HTR2C|ADRA1A|ADRA1B|ADRA1D|DRD3|DRD4|HRH1|HTR1A|HTR1B|HTR1D|HTR1E|HTR1F|HTR6|KCNH2	-0.4223	15.3525	-1.3025
gemcitabine	Ribonucleoside reductase inhibitor	RRM1|CMPK1|RRM2|TYMS	-0.4223	15.3525	-1.3025
metronidazole	Bacterial DNA inhibitor	CYP2C8|CYP2E1|CYP3A5|CYP3A7|CYP2C9|CYP3A4	-0.4223	15.3525	-1.3025
I-BET-762	Bromodomain inhibitor	BRD2|BRD3|BRD4|APOA1	-0.4222	15.3525	-1.3024
triptolide	RNA polymerase inhibitor	CYP2C19|RELA	-0.4222	15.3525	-1.3024
meisoindigo	STAT inhibitor	STAT3	-0.4222	15.3525	-1.3023
amsacrine	Topoisomerase inhibitor	TOP2A|KCNH2	-0.4222	15.3525	-1.3023
tenovins	SIRT inhibitor|p53 activator	SIRT1|SIRT2	-0.4222	15.3525	-1.3022
rebastinib	Bcr-Abl inhibitor|TIE tyrosine kinase inhibitor|VEGFR inhibitor	ABL1|BCR|FLT3|FGR|HCK|KDR|LYN|TEK|SRC	-0.4221	15.3525	-1.302
voapaxar	Thrombin inhibitor	F2R	-0.4221	15.3525	-1.302
danazol	Estrogen receptor antagonist|Progesterone receptor agonist	GNRHR|ESR1|CYP2C8|TNF|AR|CCL2|GNRHR2|PGR	-0.4221	15.3525	-1.302
DL-PDMP	Glucosyltransferase inhibitor	UGCG|ASAH1	-0.422	15.3525	-1.3017
epoxycholesterol	LXR agonist	NR1H3|NR1H2	-0.422	15.3525	-1.3016
danazol	Estrogen receptor antagonist|Progesterone receptor agonist	GNRHR|ESR1|CYP2C8|TNF|AR|CCL2|GNRHR2|PGR	-0.4219	15.3525	-1.3013
CGS-15943	Adenosine receptor antagonist	ADORA1|ADORA2A|ADORA2B|ADORA3	-0.4218	15.3525	-1.3011
KI-16425	Lysophosphatidic acid receptor antagonist	LPAR1|LPAR3	-0.4217	15.3525	-1.3007
BIIB-021	HSP inhibitor	AOX1|HSP90AA1	-0.4215	15.3525	-1.3
vanoxerine	Dopamine receptor antagonist	SLC6A3|MAOA|MAOB	-0.4215	15.3525	-1.3
rimcazole	Sigma receptor antagonist	SIGMAR1	-0.4214	15.3525	-1.2999
rucaparib	PARP inhibitor	PARP1|PARP2	-0.4214	15.3525	-1.2999
lovastatin	HMGCR inhibitor	HMGCR|CYP3A5|HDAC2|ITGAL|NR1I2	-0.4213	15.3525	-1.2996
dactinomycin	RNA polymerase inhibitor	POLR2A	-0.4212	15.3525	-1.2993
mosapride	Serotonin receptor agonist	HTR4|HTR3A	-0.4212	15.3525	-1.2993
isoreserpine	Vesicular monoamine transporter inhibitor	SLC18A2|SLC18A1	-0.4212	15.3525	-1.2992
bisindolylmaleimide-ix	PKC inhibitor	SIRT1|LRRK2|SIRT2|AKT1|GSK3B|LCK|MAPK1|MAPK11|MAPK12|MAPK14|MAPK8|PRKCA|ROCK1|RPS6KB1	-0.4211	15.3525	-1.2989
CO-101244	Ionotropic glutamate receptor antagonist	GRIN2B	-0.4211	15.3525	-1.2989
triptolide	RNA polymerase inhibitor	CYP2C19|RELA	-0.4209	15.3525	-1.2983
BX-912	PDK inhibitor	PDPK1|AKT2|CDK2|CHEK1|GSK3B|KDR|PDK1	-0.4208	15.3525	-1.2981
ASP-3026	ALK inhibitor	ALK	-0.4208	15.3525	-1.2979
BML-259	CDK inhibitor	CDK2|CDK5	-0.4207	15.3525	-1.2977
saracatinib	Src inhibitor	SRC|ABL1|LCK|YES1	-0.4207	15.3525	-1.2976
STA-5326	Interleukin inhibitor	IL12A|IL12B|IL12RB1|IL12RB2|IL23A	-0.4206	15.3525	-1.2974
LY-2811376	Beta secretase inhibitor	BACE1	-0.4206	15.3525	-1.2974
AZD-9291	EGFR inhibitor	EGFR	-0.4206	15.3525	-1.2973
voreloxin	Topoisomerase inhibitor	TOP2A|PRKDC	-0.4205	15.3525	-1.2971
UB-165	Acetylcholine receptor agonist	CHRNA3|CHRNA4|CHRNB2	-0.4205	15.3525	-1.297
mebendazole	Tubulin inhibitor	TUBA1A|TUBB|TUBB4B	-0.4204	15.3525	-1.2968
importazole	Importin inhibitor	KPNB1	-0.4202	15.3525	-1.2962
cediranib	VEGFR inhibitor|KIT inhibitor	KDR|FLT1|FLT4|KIT|PDGFRB|CSF1R|FLT3|PDGFRA	-0.42	15.3525	-1.2956
camptothecin	Topoisomerase inhibitor	TOP1|HIF1A	-0.4199	15.3525	-1.2954
BMS-927711	Calcitonin antagonist	CALCA|CALCRL	-0.4199	15.3525	-1.2951
terfenadine	Histamine receptor antagonist	HRH1|KCNH2|CHRM1|CHRM2|CHRM3|CHRM4|CHRM5|KCNH1	-0.4198	15.3525	-1.295
crizotinib	ALK inhibitor	ALK|MET|CYP2B6|CYP3A5|MST1R|ROS1	-0.4198	15.3525	-1.295
BRD-K89997465	Dopamine receptor antagonist	DRD2|DRD3|DRD4|HTR2A|ADRA2A|ADRA2B|ADRA2C|DRD1|DRD5|HRH1|HTR1A|HTR2C|HTR6|HTR7|KIF11|ADRA1A|ADRA1B|ADRA1D|CALM1|CHRM1|CHRM3|HRH4|HTR2B|KCNH2|ORM1|ORM2|SMPD1|TRPC5	-0.4198	15.3525	-1.2949
SB-415286	GSK inhibitor	GSK3B|GSK3A|RPS6KB1	-0.4198	15.3525	-1.2949
taselisib	PI3K inhibitor	PIK3CA|PIK3CB|PIK3CD|PIK3CG	-0.4198	15.3525	-1.2949
WZ-4002	EGFR inhibitor	EGFR|ERBB2	-0.4198	15.3525	-1.2948
zardaverine	Phosphodiesterase inhibitor	PDE4D|PDE3A|PDE4A|PDE4B|PDE4C	-0.4197	15.3525	-1.2947
JTE-013	Lysophospholipid receptor antagonist	S1PR2|P2RY10	-0.4197	15.3525	-1.2947
perhexiline	Carnitine palmitoyltransferase inhibitor	CPT1A|CPT2	-0.4196	15.3525	-1.2944
bortezomib	NFKB inhibitor|Proteasome inhibitor	PSMB5|PSMB1|PSMB2|CASP3|CYP2C19|NFKB1|PSMA1|PSMA2|PSMA3|PSMA4|PSMA5|PSMA6|PSMA7|PSMA8|PSMB10|PSMB11|PSMB3|PSMB4|PSMB6|PSMB7|PSMB8|PSMB9|PSMD1|PSMD2|RELA	-0.4196	15.3525	-1.2943
PF-04691502	MTOR inhibitor|PI3K inhibitor	MTOR|PIK3CA|PIK3CB|PIK3CD|PIK3CG	-0.4194	15.3525	-1.2938
dorsomorphin	AMPK inhibitor	ACVR1|BMPR1A|BMPR1B|EPHA2|FKBP1A|FLT1|FLT3|KDR|LCK|MKNK1|PRKAA1|RPS6KA1|SRC	-0.4195	15.3525	-1.2938
JTC-801	Opioid receptor antagonist	OPRL1	-0.4195	15.3525	-1.2938
MK-1775	WEE1 kinase inhibitor	WEE1	-0.4194	15.3525	-1.2936
dicoumarol	NADPH inhibitor	VKORC1|NQO1|CRYZ	-0.4193	15.3525	-1.2935
fasudil	Rho associated kinase inhibitor	ROCK1|ROCK2|PKIA|PRKACA	-0.4194	15.3525	-1.2935
naftopidil	Adrenergic receptor antagonist	ADRA1D|ADRA1A	-0.4193	15.3525	-1.2933
AG-14361	PARP inhibitor	PARP1	-0.4193	15.3525	-1.2933
talazoparib	PARP inhibitor	PARP2|PARP1	-0.4192	15.3525	-1.2931
NNC-55-0396	Calcium channel blocker	CATSPER1|CATSPER2|CATSPER3|CATSPER4	-0.4189	15.3525	-1.2922
dexniguldipine	Calmodulin inhibitor	CALM1|PRKCA|ADORA3	-0.4189	15.3525	-1.292
dabrafenib	RAF inhibitor	BRAF|CYP2B6|CYP2C19|CYP2C8|CYP3A4|LIMK1|NEK11|RAF1|SIK1	-0.4188	15.3525	-1.2918
AV-412	Receptor tyrosine protein kinase inhibitor	EGFR|ERBB2	-0.4188	15.3525	-1.2918
BRD-K73261812	Beta catenin inhibitor	CTNNB1	-0.4187	15.3525	-1.2916
atorvastatin	HMGCR inhibitor	HMGCR|DPP4|CYP3A5|FASLG|AHR	-0.4187	15.3525	-1.2914
BRD-K04546108	JAK inhibitor	JAK3	-0.4186	15.3525	-1.2911
KD-025	Rho associated kinase inhibitor	ROCK2	-0.4185	15.3525	-1.2909
BMS-387032	CDK inhibitor|Cell cycle inhibitor|MCL1 inhibitor	CDK2|CDK7|CDK9|MCL1	-0.4183	15.3525	-1.2903
BIBU-1361	EGFR inhibitor	EGFR	-0.4183	15.3525	-1.2902
SB-2343	MTOR inhibitor|PI3K inhibitor	MTOR|PIK3CA|PIK3CB|PIK3CD|PIK3CG	-0.4182	15.3525	-1.29
XMD-1150	LRRK inhibitor	LRRK2	-0.4182	15.3525	-1.2898
quizartinib	FLT3 inhibitor	FLT3|CSF1R|KIT|RET|PDGFRA|PDGFRB	-0.4181	15.3525	-1.2897
manumycin-a	Farnesyltransferase inhibitor|NFKB inhibitor	FNTA|IKBKB	-0.418	15.3525	-1.2895
anguidine	Protein synthesis inhibitor	SLC5A1	-0.4179	15.3525	-1.2891
metatinib	Bcr-Abl inhibitor	KDR|MET|ABL1|BCR	-0.4179	15.3525	-1.2889
ER-27319	Syk inhibitor	SYK	-0.4178	15.3525	-1.2888
D-64131	Tubulin inhibitor	TUBB	-0.4178	15.3525	-1.2888
danusertib	Aurora kinase inhibitor|FGFR inhibitor	AURKA|AURKB|AURKC|FGFR1|NTRK1|RET|BCR|SLK	-0.4178	15.3525	-1.2887
glipizide	Sulfonylurea	ABCC8|KCNJ11|KCNJ10|PPARG	-0.4177	15.3525	-1.2886
vanoxerine	Dopamine receptor antagonist	SLC6A3|MAOA|MAOB	-0.4177	15.3525	-1.2884
GDC-0068	AKT inhibitor	AKT1|AKT2|AKT3|CYP3A5|PRKG1	-0.4177	15.3525	-1.2884
clopidogrel	Purinergic receptor antagonist	P2RY12|CYP2B6|CYP2C19|CYP3A5	-0.4177	15.3525	-1.2884
MLN-0128	MTOR inhibitor	MTOR|PIK3CA|PIK3CD|PIK3CG	-0.4177	15.3525	-1.2884
atorvastatin	HMGCR inhibitor	HMGCR|DPP4|CYP3A5|FASLG|AHR	-0.4177	15.3525	-1.2883
papaverine	Phosphodiesterase inhibitor	PDE10A|PDE4B|PDE5A	-0.4176	15.3525	-1.2882
sorafenib	RAF inhibitor|FLT3 inhibitor|KIT inhibitor|PDGFR inhibitor|RET inhibitor|VEGFR inhibitor	RET|BRAF|FLT3|KDR|RAF1|FLT1|FLT4|KIT|DDR2|PDGFRB|FGFR1|CYP2B6|CYP2C8|CYP3A5|PDGFB|SLCO1B3	-0.4176	15.3525	-1.2882
PI-103	PI3K inhibitor|MTOR inhibitor	PIK3CA|PIK3CG|MTOR|PIK3CB|PIK3CD|PRKDC	-0.4176	15.3525	-1.288
QL-XII-47	BTK inhibitor|Cytoplasmic tyrosine protein kinase BMX inhibitor	BTK|BMX	-0.4176	15.3525	-1.288
linoleamide	ACAT inhibitor	SOAT1|SOAT2	-0.4175	15.3525	-1.2878
elacridar	P-glycoprotein inhibitor	ABCB1	-0.4175	15.3525	-1.2877
C-646	Histone acetyltransferase inhibitor	EP300	-0.4174	15.3525	-1.2876
crizotinib	ALK inhibitor	ALK|MET|CYP2B6|CYP3A5|MST1R|ROS1	-0.4174	15.3525	-1.2875
CGS-21680	Adenosine receptor agonist	ADORA2A|ADORA1|ADORA2B|ADORA3	-0.4174	15.3525	-1.2875
rimcazole	Sigma receptor antagonist	SIGMAR1	-0.4174	15.3525	-1.2875
rebastinib	Bcr-Abl inhibitor|TIE tyrosine kinase inhibitor|VEGFR inhibitor	ABL1|BCR|FLT3|FGR|HCK|KDR|LYN|TEK|SRC	-0.4174	15.3525	-1.2875
mitoxantrone	Topoisomerase inhibitor	TOP2A|PIM1	-0.4173	15.3525	-1.2873
colchicine	Tubulin inhibitor	TUBB|TUBB1|GLRA1|GLRA2|TUBA1A|TUBA1B|TUBA1C|TUBA3C|TUBA3D|TUBA3E|TUBA4A|TUBB2A|TUBB2B|TUBB3|TUBB4A|TUBB4B|TUBB6|TUBB8	-0.4172	15.3525	-1.2869
KIN001-127	ITK inhibitor	ITK	-0.4172	15.3525	-1.2868
tanespimycin	HSP inhibitor	HSP90AA1|CHEK1	-0.4171	15.3525	-1.2865
canertinib	EGFR inhibitor	EGFR|ERBB2|ERBB4|AKT1	-0.417	15.3525	-1.2864
GDC-0068	AKT inhibitor	AKT1|AKT2|AKT3|CYP3A5|PRKG1	-0.4171	15.3525	-1.2864
NU-7441	P-glycoprotein inhibitor|DNA dependent protein kinase inhibitor	PRKDC|ABCB1	-0.417	15.3525	-1.2863
NVP-TAE684	ALK inhibitor	ALK|INSR	-0.417	15.3525	-1.2862
pralatrexate	Dihydrofolate reductase inhibitor	DHFR|SLC19A1|TYMS	-0.4169	15.3525	-1.2861
fluocinolone-acetonide	Corticosteroid agonist|Glucocorticoid receptor agonist	NR3C1|SERPINA6	-0.4169	15.3525	-1.286
AZD-9291	EGFR inhibitor	EGFR	-0.4168	15.3525	-1.2858
SB-225002	CC chemokine receptor antagonist	CXCR2	-0.4168	15.3525	-1.2857
EMF-BCA1-57	Caspase inhibitor	CASP3	-0.4167	15.3525	-1.2855
gossypol	BCL inhibitor|MCL1 inhibitor	BCL2|BCL2L1|MCL1|BCL2L2|CTGF|EGF	-0.4166	11.5409	-1.2851
digoxin	Na/K-ATPase inhibitor	ATP1A1|ABCB1|RORC|SLCO1B3	-0.4166	8.2795	-1.285
GDC-0941	PI3K inhibitor	PIK3CG|PIK3CA|PIK3CB|PIK3CD	-0.4166	7.7528	-1.2849
auranofin	NFKB inhibitor	TXNRD1|TXNRD2|IKBKB|PRDX5|TRPA1	-0.4165	7.2271	-1.2847
NNC-55-0396	Calcium channel blocker	CATSPER1|CATSPER2|CATSPER3|CATSPER4	-0.4165	7.3373	-1.2847
digitoxigenin	Na/K-ATPase inhibitor	ATP1A1	-0.4165	7.1778	-1.2846
azacitidine	DNA inhibitor	DNMT1|DNMT3A	-0.4164	6.9973	-1.2845
KU-0060648	DNA inhibitor|PI3K inhibitor	PIK3CA|PIK3CB|PIK3CD|PRKDC	-0.4164	6.8514	-1.2844
PRT-062607	Syk inhibitor	SYK|FGR|MAP3K9	-0.4164	6.8608	-1.2844
YM-155	Survivin inhibitor	BIRC5	-0.4164	6.6954	-1.2843
gossypol	BCL inhibitor|MCL1 inhibitor	BCL2|BCL2L1|MCL1|BCL2L2|CTGF|EGF	-0.4164	6.7184	-1.2843
cabazitaxel	Tubulin inhibitor	CYP2C8|CYP3A5|SLCO1B3|TUBA4A|TUBB|TUBB1	-0.4163	6.5396	-1.2841
ML-179	Liver receptor homolog inverse agonist	NR5A2	-0.4163	6.4752	-1.284
risedronate	Osteoclast inhibitor	FDPS	-0.4163	6.4131	-1.2839
vortioxetine	Serotonin receptor agonist|Serotonin receptor antagonist	HTR1A|HTR1B|HTR7|SLC6A4|HTR1D|CYP2B6|CYP2C19|CYP2C8|CYP3A5|HTR2A|HTR2C|HTR3A|HTR5A|HTR6	-0.4162	6.2848	-1.2838
CD-437	Retinoid receptor agonist	RARG	-0.4161	6.1252	-1.2835
cytarabine	Ribonucleotide reductase inhibitor	POLA1|POLB|POLD1|POLE	-0.4161	6.0823	-1.2834
carmofur	Thymidylate synthase inhibitor	TYMS	-0.416	5.9676	-1.2832
picrotoxin	GABA receptor antagonist	GABRA1|GABRR1|GLRA2|GLRA3	-0.416	5.9995	-1.2832
AZ-20	ATR kinase inhibitor	ATR|MTOR	-0.4159	5.8959	-1.283
BMS-265246	CDK inhibitor	CDK1|CDK2|CCNE1	-0.416	5.9108	-1.283
mepacrine	NFKB inhibitor|Cytokine production inhibitor|p53 activator	TP53|AKT1|MTOR|NFKB1|PLA2G2A|PLA2G2D|PLA2G1B|PLA2G4A|PLA2G6|PLCL1	-0.4159	5.8453	-1.2829
sonidegib	Smoothened receptor antagonist	SMO	-0.4159	5.8003	-1.2827
aminogenistein	Src inhibitor	LCK	-0.4157	5.6753	-1.2824
benperidol	Dopamine receptor antagonist	DRD2	-0.4157	5.6049	-1.2821
pyrvinium-pamoate	Androgen receptor antagonist|AKT inhibitor	AR	-0.4156	5.5692	-1.282
cyclopiazonic-acid	ATPase inhibitor	ATP2A1	-0.4156	5.5743	-1.282
resveratrol	Cytochrome P450 inhibitor|SIRT activator	PTGS1|SIRT1|PTGS2|APOA1|BACE1|MAOA|SCN5A|TXNRD1|TXNRD2|XDH|CSNK2A1|NQO2	-0.4156	5.5259	-1.2818
TG-101348	JAK inhibitor|FLT3 inhibitor	JAK2|FLT3|RET|BRD4|JAK1|JAK3|TYK2	-0.4155	5.4583	-1.2816
flavokavain-b	Carcinogen	IKBKB	-0.4154	5.4202	-1.2814
neratinib	EGFR inhibitor	EGFR|ERBB2|ERBB4|KDR	-0.4154	5.3956	-1.2813
PF-03758309	P21 activated kinase inhibitor	PAK4	-0.4154	5.3822	-1.2812
SCH-79797	Proteasome inhibitor	F2R	-0.4153	5.3376	-1.281
ganetespib	HSP inhibitor	HSP90AA1|WT1	-0.4153	5.3396	-1.281
vincristine	Tubulin inhibitor	TUBB|TUBA4A	-0.4153	5.3442	-1.281
PD-407824	PKC inhibitor	WEE1	-0.4152	5.2883	-1.2808
AST-1306	EGFR inhibitor	EGFR|ERBB2|ERBB4	-0.4152	5.27	-1.2807
telatinib	KIT inhibitor|PDGFR inhibitor|VEGFR inhibitor	KDR|FLT4|KIT|PDGFRB	-0.4152	5.2763	-1.2807
KU-0060648	DNA inhibitor|PI3K inhibitor	PIK3CA|PIK3CB|PIK3CD|PRKDC	-0.4152	5.2764	-1.2807
R-547	CDK inhibitor	CDK2|CDK1|CDK4|CCND1|CCNE1|CDK7	-0.4152	5.2453	-1.2806
EMD-84	Angiotensin receptor antagonist	AGTR1	-0.4152	5.2527	-1.2806
SKF-96365	Calcium channel blocker	CYP3A4|TRPC1|PKD2|TRPC3|TRPC4|TRPC5|TRPV2	-0.4151	5.2389	-1.2805
RKI-1447	Rho associated kinase inhibitor	ROCK1|ROCK2|CDC42BPA|DMPK|LIMK1|MYLK|PAK1|PKN1	-0.4151	5.2175	-1.2804
PF-04691502	MTOR inhibitor|PI3K inhibitor	MTOR|PIK3CA|PIK3CB|PIK3CD|PIK3CG	-0.415	5.1373	-1.2799
MLN-4924	Nedd activating enzyme inhibitor	NAE1|UBA3	-0.415	5.138	-1.2799
terfenadine	Histamine receptor antagonist	HRH1|KCNH2|CHRM1|CHRM2|CHRM3|CHRM4|CHRM5|KCNH1	-0.4149	5.0878	-1.2796
butein	EGFR inhibitor|Src inhibitor	ACE|CXCL8|IL6|SIRT1|SRD5A1|SRD5A2|TNF	-0.4148	5.0647	-1.2795
PD-198306	MAP kinase inhibitor|MEK inhibitor	MAPK1|MAPK3|MAP2K1|MAP2K2	-0.4148	5.0533	-1.2794
SKI-II	Sphingosine kinase inhibitor	SPHK1|VCP	-0.4146	4.9946	-1.279
salermide	SIRT inhibitor	SIRT1|SIRT2	-0.4145	4.9384	-1.2786
PF-04691502	MTOR inhibitor|PI3K inhibitor	MTOR|PIK3CA|PIK3CB|PIK3CD|PIK3CG	-0.4145	4.9201	-1.2784
methylene-blue	Nitric oxide production inhibitor|Guanylyl cyclase inhibitor|Monoamine oxidase inhibitor|Tau aggregation inhibitor	ACHE|MAPT	-0.4144	4.8985	-1.2783
nicergoline	Adrenergic receptor antagonist	ADRA1A	-0.4144	4.9092	-1.2783
econazole	Lanosterol demethylase inhibitor|Bacterial cell wall synthesis inhibitor|Sterol demethylase inhibitor	CYP51A1|NPY1R|NPY2R|TRPM2|TRPV5	-0.4144	4.8963	-1.2782
gossypol	BCL inhibitor|MCL1 inhibitor	BCL2|BCL2L1|MCL1|BCL2L2|CTGF|EGF	-0.4143	4.8682	-1.278
CP-466722	ATM kinase inhibitor	ATM	-0.4143	4.8714	-1.278
amuvatinib	FLT3 inhibitor|KIT inhibitor|PDGFR inhibitor|RAD51 inhibitor|RET tyrosine kinase inhibitor	KIT|FLT3|MET|PDGFRA|AXL|MST1R|RAD51|RET	-0.4142	4.8271	-1.2777
SKI-II	Sphingosine kinase inhibitor	SPHK1|VCP	-0.4142	4.8155	-1.2776
CGS-20625	Benzodiazepine receptor agonist	GABRA1|GABRA2|GABRA3|GABRA5|GABRA4|GABRA6	-0.4142	4.8168	-1.2776
GSK-690693	AKT inhibitor	AKT1|AKT2|AKT3|PAK4|PAK6|PAK7|PRKCQ|PRKG1|PRKX	-0.4141	4.8011	-1.2774
buspirone	Serotonin receptor agonist	HTR1A|DRD2	-0.4141	4.7909	-1.2773
SC-12267	Dihydroorotate dehydrogenase inhibitor	DHODH|IL17A|IFNG	-0.414	4.7718	-1.2772
dihydrexidine	Dopamine receptor agonist	DRD1|DRD2|DRD3|DRD4|DRD5	-0.414	4.7618	-1.2771
BX-912	PDK inhibitor	PDPK1|AKT2|CDK2|CHEK1|GSK3B|KDR|PDK1	-0.414	4.7603	-1.277
IKK-16	IKK inhibitor	IKBKB	-0.4138	4.7029	-1.2765
TER-14687	Inhibitor of translocation of PKCq in T cells	PRKCQ	-0.4138	4.7032	-1.2765
LFM-A13	BTK inhibitor	BTK	-0.4137	4.664	-1.2761
arbidol	Cytochrome P450 inhibitor	CYP2C19|CYP2E1|CYP3A5|CYP3A4	-0.4136	4.6373	-1.2758
masitinib	KIT inhibitor|PDGFR inhibitor|Src inhibitor	KIT|FGFR3|LYN|PDGFRB|PDGFRA	-0.4136	4.6324	-1.2757
fulvestrant	Estrogen receptor antagonist	ESR1|EPHX2|ESR2|GPER1	-0.4135	4.6174	-1.2756
dequalinium	PKC inhibitor	KCNN1|KCNN3	-0.4135	4.6149	-1.2755
PCA-4248	Platelet activating factor receptor antagonist	PTAFR	-0.4135	4.615	-1.2755
ezetimibe	Cholesterol inhibitor|Niemann-Pick C1-like 1 protein antagonist	NPC1L1|ANPEP|SOAT1	-0.4134	4.5896	-1.2752
metronidazole	Bacterial DNA inhibitor	CYP2C8|CYP2E1|CYP3A5|CYP3A7|CYP2C9|CYP3A4	-0.4133	4.5538	-1.2748
BML-259	CDK inhibitor	CDK2|CDK5	-0.4131	4.518	-1.2744
NSC-3852	HDAC inhibitor	HDAC1	-0.4131	4.5013	-1.2741
disulfiram	Aldehyde dehydrogenase inhibitor|DNA methyltransferase inhibitor|TRPV agonist	ALDH2|ALDH1A2|ALDH5A1|ALDH7A1|CYP2E1|DNMT1|TRPA1|DBH	-0.4129	4.4693	-1.2737
pyrvinium-pamoate	Androgen receptor antagonist|AKT inhibitor	AR	-0.4128	4.4465	-1.2734
VER-155008	HSP inhibitor	HSPA1A	-0.4128	4.4357	-1.2733
methapyrilene	Histamine receptor antagonist	HRH1	-0.4128	4.4338	-1.2732
PD-407824	PKC inhibitor	WEE1	-0.4126	4.4042	-1.2728
donepezil	Acetylcholinesterase inhibitor	ACHE|HTR2A	-0.4126	4.3941	-1.2727
amitriptyline	Norepinephrine inhibitor|Norepinephrine reuptake inhibitor|Serotonin receptor antagonist|Serotonin reuptake inhibitor	SLC6A2|SLC6A4|CHRM1|CHRM2|CHRM3|CHRM4|CHRM5|HRH1|HTR6|CYP2C19|CYP3A5|SCN4A|ADRA1A|ADRA1B|ADRA1D|ADRA2A|ADRB1|ADRB2|ADRB3|HRH2|HRH4|HTR1A|HTR1B|HTR1D|HTR2A|HTR2C|HTR7|KCNA1|KCND2|KCND3|KCNQ2|KCNQ3|NTRK1|NTRK2|OPRD1|OPRK1|OPRM1|SIGMAR1	-0.4125	4.3767	-1.2724
afatinib	EGFR inhibitor	EGFR|ERBB2|ERBB4	-0.4125	4.3656	-1.2722
ZSTK-474	PI3K inhibitor	PIK3CG|PIK3CA|PIK3CB|PIK3CD	-0.4123	4.336	-1.2718
raltitrexed	Thymidylate synthase inhibitor	TYMS|FPGS	-0.4122	4.3127	-1.2714
C-646	Histone acetyltransferase inhibitor	EP300	-0.4122	4.3083	-1.2713
RG-2833	HDAC inhibitor	HDAC1|HDAC3	-0.4121	4.304	-1.2712
manumycin-a	Farnesyltransferase inhibitor|NFKB inhibitor	FNTA|IKBKB	-0.4121	4.2942	-1.2711
alpelisib	PI3K inhibitor	PIK3CA|PIK3CB|PIK3CD|PIK3CG	-0.412	4.2872	-1.271
AT-13387	HSP inhibitor	HSP90AA1	-0.4121	4.2908	-1.271
KIN001-055	EGFR inhibitor|JAK inhibitor|Leukotriene inhibitor|Mediator release inhibitor	JAK3	-0.412	4.2755	-1.2708
ACY-1215	HDAC inhibitor	HDAC6|HDAC1|HDAC2|HDAC3|HDAC8	-0.412	4.2775	-1.2708
WAY-170523	Metalloproteinase inhibitor	MMP13	-0.4119	4.266	-1.2706
GDC-0068	AKT inhibitor	AKT1|AKT2|AKT3|CYP3A5|PRKG1	-0.4118	4.2525	-1.2704
meisoindigo	STAT inhibitor	STAT3	-0.4119	4.2564	-1.2704
SCH-79797	Proteasome inhibitor	F2R	-0.4118	4.2493	-1.2703
carbenoxolone	11-beta-HSD1 inhibitor	HSD11B1|GJA1|GJA10|GJA3|GJA4|GJA5|GJA8|GJA9|GJB1|GJB2|GJB3|GJB4|GJB5|GJB6|GJB7|GJC1|GJC2|GJC3|GJD2|GJD3|GJD4|GJE1|PANX1|PANX2|PANX3	-0.4118	4.2369	-1.2701
primaquine	Antimalarial|DNA inhibitor	KRT7|NQO2	-0.4118	4.2374	-1.2701
AST-1306	EGFR inhibitor	EGFR|ERBB2|ERBB4	-0.4118	4.2391	-1.2701
elesclomol	Oxidizing agent	TOP2A|HSPA1A	-0.4117	4.23	-1.27
pyrvinium-pamoate	Androgen receptor antagonist|AKT inhibitor	AR	-0.4117	4.2251	-1.2699
noretynodrel	Progestogen hormone	PGR	-0.4117	4.2286	-1.2699
cimaterol	Adrenergic receptor agonist	ADRB1|ADRB2|ADRB3	-0.4117	4.2197	-1.2698
BX-795	IKK inhibitor	PDPK1|IKBKE|TBK1|CDK2|CHEK1|GSK3B|KDR|PDK1	-0.4117	4.2233	-1.2698
cediranib	VEGFR inhibitor|KIT inhibitor	KDR|FLT1|FLT4|KIT|PDGFRB|CSF1R|FLT3|PDGFRA	-0.4116	4.2162	-1.2697
PF-04691502	MTOR inhibitor|PI3K inhibitor	MTOR|PIK3CA|PIK3CB|PIK3CD|PIK3CG	-0.4115	4.1992	-1.2694
triptolide	RNA polymerase inhibitor	CYP2C19|RELA	-0.4115	4.1936	-1.2693
altrenogest	Progestogen hormone	PGR	-0.4115	4.1955	-1.2693
loperamide	Opioid receptor agonist	OPRM1|OPRD1|CYP2B6|CYP2C8|NPR2|CACNA1A|CALM1|OPRK1|POMC	-0.4115	4.1904	-1.2692
methotrexate	Dihydrofolate reductase inhibitor	DHFR|AOX1|FOLR1|TYMS	-0.4113	4.1672	-1.2688
puromycin	Protein synthesis inhibitor	RPL10L|RPL11|RPL13A|RPL15|RPL19|RPL23|RPL23A|RPL26L1|RPL3|RPL37|RPL8|RSL24D1|SNU13	-0.4112	4.1529	-1.2685
oxaprozin	Cyclooxygenase inhibitor	PTGS1|PTGS2	-0.4112	4.1536	-1.2685
vismodegib	Hedgehog pathway inhibitor|Smoothened receptor antagonist	SMO|ABCB1|ABCG2|CYP2C19|CYP2C8|DHH|IHH|PTCH1	-0.4112	4.1472	-1.2684
H-89	PKA inhibitor	PRKACA|KCNA2|KCNA3|KCNA5|KCNAB2|KCNC1|KCNC2|KCNC3|KCNE1|KCNE2|KCNE3|KCNE4|KCNH1|KCNH2|KCNQ1|KCNQ2|KCNQ3|KCNQ5|KCNS3|GSG2|PKIA	-0.4112	4.1483	-1.2684
BAY-61-3606	Syk inhibitor	SYK	-0.4112	4.1454	-1.2683
PF-05212384	MTOR inhibitor|PI3K inhibitor	MTOR|PIK3CA|PIK3CG	-0.4112	4.1458	-1.2683
ixazomib	Proteasome inhibitor	PSMB1	-0.4111	4.1387	-1.2682
CHIR-99021	GSK inhibitor	CDK1|GSK3A|GSK3B|MAPK1	-0.4112	4.1409	-1.2682
TGX-221	PI3K inhibitor	PIK3CB|PIK3CD	-0.411	4.1245	-1.2679
CEP-37440	ALK inhibitor	ALK	-0.411	4.1157	-1.2677
lacidipine	Calcium channel blocker	CACNA1C	-0.411	4.1126	-1.2676
WZ-4002	EGFR inhibitor	EGFR|ERBB2	-0.4108	4.0909	-1.2672
QL-XII-47	BTK inhibitor|Cytoplasmic tyrosine protein kinase BMX inhibitor	BTK|BMX	-0.4108	4.0925	-1.2672
daunorubicin	RNA synthesis inhibitor|Topoisomerase inhibitor	TOP2A|TOP2B	-0.4108	4.0878	-1.2671
KIN001-127	ITK inhibitor	ITK	-0.4107	4.0783	-1.2669
MK-2206	AKT inhibitor	AKT1|AKT2|AKT3	-0.4107	4.0758	-1.2668
GDC-0068	AKT inhibitor	AKT1|AKT2|AKT3|CYP3A5|PRKG1	-0.4105	4.0528	-1.2663
cladribine	Adenosine deaminase inhibitor|Ribonucleoside reductase inhibitor	ADA|PNP|POLA1|POLE|POLE2|POLE3|POLE4|RRM1|RRM2|RRM2B	-0.4103	4.0196	-1.2656
alizapride	Dopamine receptor antagonist	DRD2	-0.4103	4.0156	-1.2655
everolimus	MTOR inhibitor	MTOR|CYP3A5|FKBP1A	-0.4102	4.0075	-1.2653
KW-2449	Abl inhibitor|Aurora kinase inhibitor|FLT3 inhibitor	FLT3|ABL1|AURKA|FGFR1|AURKB	-0.4101	3.9987	-1.2651
U-0126	MEK inhibitor	MAP2K1|MAP2K2|JAK2|AKT1|CHEK1|GSK3B|LCK|MAP2K7|MAPK1|MAPK11|MAPK12|MAPK14|MAPK8|PRKCA|RAF1|ROCK1|RPS6KB1|SGK1	-0.4101	3.9992	-1.2651
everolimus	MTOR inhibitor	MTOR|CYP3A5|FKBP1A	-0.4101	3.9969	-1.265
ganetespib	HSP inhibitor	HSP90AA1|WT1	-0.41	3.9877	-1.2648
JLK-6	Gamma secretase inhibitor|Beta amyloid inhibitor	PSEN1	-0.4099	3.9716	-1.2644
cladribine	Adenosine deaminase inhibitor|Ribonucleoside reductase inhibitor	ADA|PNP|POLA1|POLE|POLE2|POLE3|POLE4|RRM1|RRM2|RRM2B	-0.4098	3.9633	-1.2642
carfilzomib	Proteasome inhibitor	PSMB1|PSMB10|PSMB2|PSMB5|PSMB8|PSMB9|PSMA1|PSMA2|PSMA3|PSMA4|PSMA5|PSMA6|PSMA7|PSMA8|PSMB11|PSMB3|PSMB4|PSMB6|PSMB7	-0.4099	3.9661	-1.2642
miconazole	Bacterial cell wall synthesis inhibitor	CYP19A1|KCNH2|KCNH6|KCNH7|KCNMA1|KCNMB1|KCNMB2|KCNMB3|KCNMB4|KCNN1|KCNN2|KCNN3|KCNN4|NOS2|NOS3|TRPM2|TRPV5	-0.4098	3.9567	-1.264
dicoumarol	NADPH inhibitor	VKORC1|NQO1|CRYZ	-0.4098	3.9549	-1.2639
gefitinib	EGFR inhibitor	EGFR|CYP2C19	-0.4097	3.9484	-1.2638
camptothecin	Topoisomerase inhibitor	TOP1|HIF1A	-0.4097	3.9414	-1.2636
BRD-K68202742	HDAC inhibitor|CDK expression enhancer|ID1 expression inhibitor	HDAC1|HDAC3|HDAC4|HDAC6|HDAC7|HDAC8|HDAC10|HDAC2|HDAC5|HDAC9	-0.4097	3.9433	-1.2636
LY-2811376	Beta secretase inhibitor	BACE1	-0.4096	3.9305	-1.2633
AEE-788	EGFR inhibitor|VEGFR inhibitor	EGFR|ERBB2|KDR|ERBB4|FLT1|FGFR2|FGFR3	-0.4095	3.9283	-1.2632
BI-2536	PLK inhibitor	PLK1|BRD4|PLK2|PLK3	-0.4095	3.9233	-1.2631
lylamine	Cannabinoid receptor agonist	CNR1	-0.4094	3.914	-1.2629
pyroxamide	HDAC inhibitor	HDAC1	-0.4094	3.9158	-1.2629
Y-26763	Potassium channel activator	KCNJ8|ABCC9	-0.4094	3.9089	-1.2627
AST-1306	EGFR inhibitor	EGFR|ERBB2|ERBB4	-0.4093	3.8997	-1.2625
KIN001-244	PDK1 Inhibitor	PDPK1	-0.4093	3.9004	-1.2625
nomegestrol-acetate	Progesterone receptor agonist	PGR	-0.4093	3.8972	-1.2624
doxorubicin	Topoisomerase inhibitor	TOP2A	-0.4092	3.8888	-1.2622
romidepsin	HDAC inhibitor	HDAC1|HDAC2|CYP2B6|CYP2C19|CYP3A5|HDAC3|HDAC4|HDAC5|HDAC6|HDAC7|HDAC8|HDAC9	-0.409	3.8711	-1.2617
neratinib	EGFR inhibitor	EGFR|ERBB2|ERBB4|KDR	-0.409	3.8725	-1.2617
BRD-K68202742	HDAC inhibitor|CDK expression enhancer|ID1 expression inhibitor	HDAC1|HDAC3|HDAC4|HDAC6|HDAC7|HDAC8|HDAC10|HDAC2|HDAC5|HDAC9	-0.409	3.865	-1.2615
ruxolitinib	JAK inhibitor	JAK1|JAK2|TYK2|JAK3	-0.4089	3.8556	-1.2612
duloxetine	Norepinephrine inhibitor|Serotonin reuptake inhibitor	SLC6A2|SLC6A4|SLC6A3|HTR2A|HTR2C|HTR6	-0.4088	3.8494	-1.261
PIK-93	PI3K inhibitor	PI4KB|PIK3C3|PIK3CG	-0.4088	3.8442	-1.2609
ryuvidine	Histone lysine methyltransferase inhibitor	CDK4|CDK2	-0.4087	3.8374	-1.2607
bithionol	Autotaxin inhibitor	ESR1|ESR2|MCL1	-0.4087	3.8336	-1.2606
afatinib	EGFR inhibitor	EGFR|ERBB2|ERBB4	-0.4085	3.8215	-1.2602
BMS-345541	IKK inhibitor	IKBKB|CHUK	-0.4085	3.8193	-1.2601
BGT-226	PI3K inhibitor	MTOR|PIK3CG|PIK3CA|PIK3CB	-0.4085	3.8165	-1.26
mibefradil	Calcium channel blocker	CACNA1H|CACNA1G|CACNA1C|CACNA1I|SCN2A|SCN4A|SCN5A|SCN9A|ANO1|CACNA1D|CACNA1F|CACNA1S|CACNB1|CACNB2|CACNB3|CACNB4|CATSPER1|CATSPER2|CATSPER3|CATSPER4	-0.4085	3.8121	-1.2599
tasquinimod	Angiogenesis inhibitor|S100A9 inhibitor	HDAC4|S100A9	-0.4085	3.8133	-1.2599
trametinib	MEK inhibitor	MAP2K1|MAP2K2|CYP2C8|CYP3A4	-0.4084	3.808	-1.2598
GSK-461364	PLK inhibitor	PLK1	-0.4084	3.8091	-1.2598
dasatinib	KIT inhibitor|Bcr-Abl inhibitor|Ephrin inhibitor|PDGFR inhibitor|Src inhibitor|Tyrosine kinase inhibitor	ABL1|FYN|LCK|SRC|KIT|YES1|EPHA2|LYN|PDGFRB|BCR|BTK|DDR1|DDR2|PDGFRA|ABL2|BLK|FGR|FRK|HCK|SRMS|STAT5B	-0.4084	3.8072	-1.2597
masitinib	KIT inhibitor|PDGFR inhibitor|Src inhibitor	KIT|FGFR3|LYN|PDGFRB|PDGFRA	-0.4083	3.801	-1.2595
ONO-4059	BTK inhibitor	BTK	-0.4082	3.789	-1.2592
nitrendipine	Calcium channel blocker	CACNA1C|CACNA1D|CACNA2D1|CACNA1H|CACNA1S|CACNA2D2|CACNB2|CACNG1|KCNN4	-0.4082	3.79	-1.2592
vorinostat	HDAC inhibitor	HDAC1|HDAC2|HDAC3|HDAC6|HDAC8|HDAC10|HDAC11|HDAC5|HDAC9	-0.4082	3.7911	-1.2592
hexachlorophene	Potassium channel activator	ENPP2|GLUD1|SDHD	-0.4082	3.7883	-1.2591
MEK-162	MEK inhibitor	MAP2K1|MAP2K2|IL1R2|IL6R|TNFRSF1A	-0.4082	3.7884	-1.2591
epirubicin	Topoisomerase inhibitor	TOP2A|CHD1	-0.4081	3.7824	-1.259
pazopanib	VEGFR inhibitor|KIT inhibitor|PDGFR inhibitor	KDR|KIT|FLT1|FLT4|PDGFRB|PDGFRA|BRAF|CYP2B6|CYP2C8|CYP2E1|DDR2|CSF1R|FGF1|FGFR1|FGFR3|ITK|SH2B3	-0.4081	3.7795	-1.2589
DL-PDMP	Glucosyltransferase inhibitor	UGCG|ASAH1	-0.4081	3.7811	-1.2589
BGT-226	PI3K inhibitor	MTOR|PIK3CG|PIK3CA|PIK3CB	-0.4081	3.7737	-1.2587
SGI-1776	PIM inhibitor	PIM1|FLT3|PIM2|PIM3	-0.4081	3.7757	-1.2587
oxymetazoline	Adrenergic receptor agonist	ADRA1A|ADRA2A|ADRA1B|ADRA1D|ADRA2B|ADRA2C|CYP2C19|HTR1B|HTR1D|HTR2C	-0.408	3.7652	-1.2584
NU-7441	P-glycoprotein inhibitor|DNA dependent protein kinase inhibitor	PRKDC|ABCB1	-0.408	3.7657	-1.2584
BS-181	CDK inhibitor	CDK7	-0.4079	3.7576	-1.2581
PF-04457845	FAAH inhibitor	FAAH	-0.4078	3.7533	-1.258
regorafenib	FGFR inhibitor|KIT inhibitor|PDGFR inhibitor|RAF inhibitor|RET inhibitor|VEGFR inhibitor	KDR|KIT|RET|FLT1|FLT4|PDGFRA|TEK|BRAF|ABL1|DDR2|FGFR1|FGFR2|FRK|MAPK11|PDGFRB|RAF1|CYP2B6|CYP2C19|CYP2C8|FGF2|EPHA2|NTRK1	-0.4078	3.7541	-1.258
C-646	Histone acetyltransferase inhibitor	EP300	-0.4078	3.7547	-1.258
LE-300	Dopamine receptor antagonist	DRD5	-0.4079	3.7549	-1.258
carvedilol	Adrenergic receptor antagonist	ADRB1|ADRB2|ADRA1A|ADRA1B|ADRA1D|ADRB3|CYP2C19|CYP2E1|RYR2|ADRA2A|ADRA2B|ADRA2C|GJA1|HIF1A|KCNH2|NDUFC2|NPPB|SELE|VCAM1|VEGFA	-0.4077	3.7435	-1.2576
CD-437	Retinoid receptor agonist	RARG	-0.4077	3.7436	-1.2576
CGP-57380	MAP kinase inhibitor	MKNK1|AURKB|LCK|MKNK2|SGK1	-0.4077	3.7395	-1.2575
epoxycholesterol	LXR agonist	NR1H3|NR1H2	-0.4077	3.7404	-1.2575
tioconazole	Sterol demethylase inhibitor	CYP51A1	-0.4076	3.7359	-1.2574
WZ-4002	EGFR inhibitor	EGFR|ERBB2	-0.4076	3.7294	-1.2572
copanlisib	PI3K inhibitor	PIK3CA|PIK3CD|PIK3CB|PIK3CG	-0.4075	3.7264	-1.2571
apremilast	Phosphodiesterase inhibitor	PDE4A|PDE4B|PDE4C|PDE4D|TNF|TNFRSF1A	-0.4075	3.7243	-1.257
everolimus	MTOR inhibitor	MTOR|CYP3A5|FKBP1A	-0.4075	3.7206	-1.2568
Merck60	HDAC inhibitor	HDAC1|HDAC2	-0.4074	3.7171	-1.2567
LY-303511	Casein kinase inhibitor|PI3K inhibitor	CSNK2A1|CSNK2A2|CSNK2B|MTOR|BRD2|BRD3|BRD4	-0.4074	3.7144	-1.2566
pimozide	Dopamine receptor antagonist	DRD2|DRD3|HTR2A|CACNA1I|CALM1|DRD1|DRD4|DRD5|HRH1|HTR1A|KCNA10|KCNH2	-0.4073	3.7099	-1.2565
doxorubicin	Topoisomerase inhibitor	TOP2A	-0.4074	3.7117	-1.2565
venlafaxine	Serotonin receptor antagonist|Adrenergic receptor antagonist|Norepinephrine reuptake inhibitor	SLC6A2|SLC6A4|CYP2C19|SLC6A3	-0.4073	3.7087	-1.2564
gelsemine	Acetylcholine receptor antagonist|Glycine receptor antagonist	GLRA3	-0.4073	3.702	-1.2562
tosedostat	Peptidase inhibitor	ANPEP|NPEPPS|LAP3	-0.4072	3.6991	-1.2561
metronidazole	Bacterial DNA inhibitor	CYP2C8|CYP2E1|CYP3A5|CYP3A7|CYP2C9|CYP3A4	-0.4072	3.6956	-1.256
aminopurvalanol-a	Tyrosine kinase inhibitor|CDK inhibitor	CDK2|CDK1|CDK5|CDK6	-0.4072	3.6968	-1.256
SCH-79797	Proteasome inhibitor	F2R	-0.4071	3.6885	-1.2557
GSK-1070916	Aurora kinase inhibitor	AURKB|AURKC|AURKA|CYP2D6|CYP3A4	-0.4071	3.6886	-1.2557
YC-1	Guanylyl cyclase activator	HIF1A|GUCY1A2|GUCY1A3|GUCY1B3	-0.4071	3.689	-1.2557
vandetanib	EGFR inhibitor|RET tyrosine kinase inhibitor|VEGFR inhibitor	EGFR|KDR|RET|FLT1|FLT4|PTK6|TEK|FLT3|KIT|EPHA1|EPHA10|EPHA2|EPHA3|EPHA4|EPHA5|EPHA6|EPHA7|EPHA8|EPHB1|EPHB2|EPHB3|EPHB4|EPHB6|ERBB2|ERBB3|ERBB4|SRC|VEGFA	-0.4071	3.6895	-1.2557
phloretin	Sodium channel inhibitor	AQP9|CLCN3|SLC23A1	-0.4071	3.6867	-1.2556
isotretinoin	Retinoid receptor agonist	CYP2B6|CYP2C19|CYP2C8|CYP3A5|CYP3A7|RARA|RARB|RARG	-0.407	3.6842	-1.2555
pirarubicin	Topoisomerase inhibitor	TOP2A	-0.4069	3.6725	-1.2551
bisindolylmaleimide-ix	PKC inhibitor	SIRT1|LRRK2|SIRT2|AKT1|GSK3B|LCK|MAPK1|MAPK11|MAPK12|MAPK14|MAPK8|PRKCA|ROCK1|RPS6KB1	-0.4069	3.6709	-1.255
phenformin	AMPK activator	KCNJ8|PRKAA1	-0.4067	3.6581	-1.2546
S-14506	Serotonin receptor agonist	HTR1A|DRD2|HTR2C	-0.4067	3.6558	-1.2545
mitoxantrone	Topoisomerase inhibitor	TOP2A|PIM1	-0.4067	3.6559	-1.2545
talnetant	Tachykinin antagonist	TACR3|TACR2	-0.4067	3.6567	-1.2545
fluvastatin	HMGCR inhibitor	HMGCR|CYP2C8	-0.4067	3.653	-1.2544
BRD-A02367930	Estrogen receptor agonist|DNA directed DNA polymerase stimunlant|Estrogenic component in oral contraceptives	ESR1|CYP2C8|ESR2|NR1I2	-0.4066	3.6499	-1.2543
rescinnamine	ACE inhibitor	ACE	-0.4066	3.6489	-1.2542
dinaciclib	CDK inhibitor	CDK1|CDK2|CDK9|CDK5|CCNT1	-0.4065	3.6404	-1.2539
PF-03814735	Aurora kinase inhibitor	AURKA|AURKB	-0.4065	3.6372	-1.2538
KU-55933	ATM kinase inhibitor	ATM|PRKDC	-0.4064	3.6317	-1.2535
KD-025	Rho associated kinase inhibitor	ROCK2	-0.4063	3.628	-1.2534
GDC-0199	BCL inhibitor	BCL2	-0.4063	3.6238	-1.2532
carfilzomib	Proteasome inhibitor	PSMB1|PSMB10|PSMB2|PSMB5|PSMB8|PSMB9|PSMA1|PSMA2|PSMA3|PSMA4|PSMA5|PSMA6|PSMA7|PSMA8|PSMB11|PSMB3|PSMB4|PSMB6|PSMB7	-0.4063	3.6209	-1.2531
CAY-10470	NFKB inhibitor	NFKB1|TNF	-0.4061	3.6104	-1.2527
WZ-4002	EGFR inhibitor	EGFR|ERBB2	-0.4061	3.6115	-1.2527
loperamide	Opioid receptor agonist	OPRM1|OPRD1|CYP2B6|CYP2C8|NPR2|CACNA1A|CALM1|OPRK1|POMC	-0.406	3.6019	-1.2523
HU-211	Glutamate receptor antagonist	CNR1|CNR2|GRIN1	-0.4059	3.5978	-1.2522
BMS-536924	IGF-1 inhibitor	IGF1R|INSR|AKT1|CCNE1|CDK2|CYP3A4|ERBB2|KDR|LCK|MAPK1|MET|PDGFRA|PDGFRB	-0.4057	3.5834	-1.2515
pyrvinium-pamoate	Androgen receptor antagonist|AKT inhibitor	AR	-0.4057	3.579	-1.2514
azacitidine	DNA inhibitor	DNMT1|DNMT3A	-0.4057	3.577	-1.2513
BRD-K08177763	MTOR inhibitor	MTOR|PTEN	-0.4056	3.5738	-1.2511
torin-2	MTOR inhibitor	MTOR	-0.4056	3.5699	-1.251
camptothecin	Topoisomerase inhibitor	TOP1|HIF1A	-0.4055	3.5678	-1.2509
entinostat	HDAC inhibitor	HDAC1|HDAC2|HDAC3|HDAC9	-0.4055	3.5684	-1.2509
vindesine	Tubulin inhibitor	TUBB|TUBB1	-0.4055	3.5651	-1.2508
tanespimycin	HSP inhibitor	HSP90AA1|CHEK1	-0.4055	3.5643	-1.2507
aminopurvalanol-a	Tyrosine kinase inhibitor|CDK inhibitor	CDK2|CDK1|CDK5|CDK6	-0.4054	3.5597	-1.2505
doxorubicin	Topoisomerase inhibitor	TOP2A	-0.4054	3.5574	-1.2504
KIN001-127	ITK inhibitor	ITK	-0.4053	3.5545	-1.2503
EPZ-020411	PRMT inhibitor	PRMT6	-0.4054	3.5559	-1.2503
clotrimazole	Cytochrome P450 inhibitor|Imidazoline ligand	KCNN4|CYP51A1|CYP3A4|NR1I2|NR1I3|TRPM2|TRPM4|TRPM8	-0.4053	3.552	-1.2502
GSK-J1	Histone demethylase inhibitor	KDM6B|KDM6A|TNF	-0.4052	3.5472	-1.25
PRT-062607	Syk inhibitor	SYK|FGR|MAP3K9	-0.4052	3.545	-1.2499
masitinib	KIT inhibitor|PDGFR inhibitor|Src inhibitor	KIT|FGFR3|LYN|PDGFRB|PDGFRA	-0.4052	3.545	-1.2499
lonafarnib	Farnesyltransferase inhibitor	FNTA|HRAS|KRAS|NRAS	-0.4052	3.5433	-1.2498
BAY-11-7082	NFKB inhibitor	RELA	-0.4051	3.5388	-1.2496
genistein	Tyrosine kinase inhibitor	CFTR|ESR2|EGFR|ESR1|ESRRA|ESRRB|ESRRG|NCOA1|NCOA2|PPARG|PTK2B|TOP2A|TRPC5	-0.405	3.533	-1.2493
AVN-944	Inosine monophosphate dehydrogenase inhibitor	IMPDH2|IMPDH1	-0.405	3.533	-1.2493
NNC-05-2090	GAT inhibitor|GABA uptake inhibitor	SLC6A11|SLC6A13|SLC6A12	-0.405	3.5334	-1.2493
cytarabine	Ribonucleoside reductase inhibitor	POLA1|POLB|POLD1|POLE	-0.405	3.5293	-1.2492
bazedoxifene	Selective estrogen receptor modulator (SERM)	ESR1|ESR2	-0.405	3.5303	-1.2492
obatoclax	BCL inhibitor	BCL2|BCL2L1|MCL1	-0.4049	3.5257	-1.249
triptolide	RNA polymerase inhibitor	CYP2C19|RELA	-0.4048	3.5159	-1.2485
nelfinavir	HIV inhibitor	CYP2C19|CYP3A7|CYP3A5|CYP1A2|CYP2B6|CYP2C9|CYP2D6|CYP3A4	-0.4047	3.5123	-1.2484
manumycin-a	Farnesyltransferase inhibitor|NFKB inhibitor	FNTA|IKBKB	-0.4047	3.5113	-1.2483
phloretin	Sodium channel inhibitor	AQP9|CLCN3|SLC23A1	-0.4046	3.5017	-1.2479
rivaroxaban	Coagulation factor inhibitor	F10|CYP2J2|CYP3A5	-0.4045	3.4996	-1.2478
honokiol	AKT inhibitor	ALOX5|PTGS1|PTGS2	-0.4044	3.4889	-1.2472
fulvestrant	Estrogen receptor antagonist	ESR1|EPHX2|ESR2|GPER1	-0.4043	3.4834	-1.247
JTC-801	Opioid receptor antagonist	OPRL1	-0.4042	3.4799	-1.2468
dovitinib	EGFR inhibitor|FGFR inhibitor|FLT3 inhibitor|PDGFR inhibitor|VEGFR inhibitor	FGFR1|FLT1|KDR|EGFR|FGFR3|FLT3|FLT4|KIT|PDGFRB|CSF1R|FGFR2|INSR|PDGFRA	-0.4042	3.4783	-1.2467
LY-2603618	CHK inhibitor	CHEK1	-0.4041	3.4756	-1.2466
piroxicam	Cyclooxygenase inhibitor	PTGS2|PTGS1	-0.4042	3.4768	-1.2466
disopyramide	Sodium channel inhibitor	SCN5A|CHRM1|CHRM2|CHRM3|KCND2|KCND3|KCNH2	-0.4041	3.4704	-1.2463
RAF-265	RAF inhibitor|VEGFR inhibitor	BRAF|KDR|KIT|PDGFRB|RAF1	-0.404	3.4671	-1.2462
MG-132	Proteasome inhibitor	PSMB1	-0.404	3.4684	-1.2462
BRD-K47000838	Tubulin inhibitor	ACTB	-0.404	3.4688	-1.2462
PHA-793887	CDK inhibitor	CDK1|CDK2|CDK4|CDK5|CCND1|CCNE1|CDK7|CDK9	-0.404	3.4657	-1.2461
NSC-3852	HDAC inhibitor	HDAC1	-0.404	3.4666	-1.2461
dorsomorphin	AMPK inhibitor	ACVR1|BMPR1A|BMPR1B|EPHA2|FKBP1A|FLT1|FLT3|KDR|LCK|MKNK1|PRKAA1|RPS6KA1|SRC	-0.4039	3.4627	-1.2459
ENMD-2076	Aurora kinase inhibitor|FLT3 inhibitor|VEGFR inhibitor	AURKA|FLT3|KDR|PDGFRA|SRC|CSF1R|EPHA1|FGFR1|FGFR2|FGFR3|FLT4|KIT|PTK2	-0.4038	3.4559	-1.2456
TC-S-7006	MAP kinase inhibitor	MAP3K8	-0.4038	3.4563	-1.2456
TG-101348	JAK inhibitor|FLT3 inhibitor	JAK2|FLT3|RET|BRD4|JAK1|JAK3|TYK2	-0.4038	3.454	-1.2455
AZD-7762	CHK inhibitor	CHEK1|CHEK2	-0.4037	3.4496	-1.2453
LY-303511	Casein kinase inhibitor|PI3K inhibitor	CSNK2A1|CSNK2A2|CSNK2B|MTOR|BRD2|BRD3|BRD4	-0.4037	3.448	-1.2452
mocetinostat	HDAC inhibitor	HDAC1|HDAC2|HDAC3|HDAC11	-0.4037	3.4484	-1.2452
KU-55933	ATM kinase inhibitor	ATM|PRKDC	-0.4036	3.4455	-1.2451
mocetinostat	HDAC inhibitor	HDAC1|HDAC2|HDAC3|HDAC11	-0.4036	3.4434	-1.245
NCH-51	HDAC inhibitor	HDAC1|HDAC10|HDAC11|HDAC2|HDAC3|HDAC4|HDAC5|HDAC6|HDAC7|HDAC8|HDAC9	-0.4036	3.444	-1.245
rhodomyrtoxin-b	Carcinogen|DNA intercalating agent	SLCO1B3	-0.4036	3.445	-1.245
wortmannin	PI3K inhibitor	PLK1|PIK3CA|PIK3CG|ATM|ATR|MTOR|PLK3|PI4KA|PI4KB|PIK3CD|PIK3R1|PRKDC	-0.4035	3.4352	-1.2445
H-89	PKA inhibitor	PRKACA|KCNA2|KCNA3|KCNA5|KCNAB2|KCNC1|KCNC2|KCNC3|KCNE1|KCNE2|KCNE3|KCNE4|KCNH1|KCNH2|KCNQ1|KCNQ2|KCNQ3|KCNQ5|KCNS3|GSG2|PKIA	-0.4034	3.4286	-1.2442
pyrvinium-pamoate	Androgen receptor antagonist|AKT inhibitor	AR	-0.4033	3.4266	-1.2441
lonafarnib	Farnesyltransferase inhibitor	FNTA|HRAS|KRAS|NRAS	-0.4033	3.4272	-1.2441
lestaurtinib	FLT3 inhibitor|Growth factor receptor inhibitor|JAK inhibitor	FLT3|NTRK1|JAK2|NTRK2|NTRK3	-0.4033	3.4236	-1.2439
sirolimus	MTOR inhibitor	MTOR|FKBP1A|CCR5|FGF2	-0.4032	3.4217	-1.2438
BRD-K04546108	JAK inhibitor	JAK3	-0.4032	3.4172	-1.2436
BRD-K26664453	Tubulin inhibitor	ACTB	-0.4031	3.4164	-1.2435
doxorubicin	Topoisomerase inhibitor	TOP2A	-0.4031	3.4147	-1.2434
BMS-387032	CDK inhibitor|Cell cycle inhibitor|MCL1 inhibitor	CDK2|CDK7|CDK9|MCL1	-0.4031	3.413	-1.2433
barasertib-HQPA	Aurora kinase inhibitor	AURKB|AURKC|AURKA	-0.403	3.4075	-1.243
imatinib	PDGFR inhibitor|Bcr-Abl inhibitor|KIT inhibitor	ABL1|KIT|PDGFRA|BCR|CSF1R|PDGFRB|ABCG2|CYP2C19|CYP2C8|CYP3A5|DDR1|NTRK1|RET	-0.4029	3.4043	-1.2429
BRL-15572	Serotonin receptor antagonist	HTR1D|HTR1A|HTR1B|HTR1E|HTR1F|HTR2A|HTR2B|HTR2C|HTR6	-0.4029	3.4054	-1.2429
voxtalisib	MTOR inhibitor|PI3K inhibitor	MTOR|PIK3CA	-0.4029	3.4029	-1.2428
edoxaban	Coagulation factor inhibitor	F10|CYP3A5	-0.4029	3.404	-1.2428
BGT-226	PI3K inhibitor	MTOR|PIK3CG|PIK3CA|PIK3CB	-0.4029	3.4018	-1.2427
valrubicin	DNA inhibitor|Topoisomerase inhibitor	TOP2A	-0.4029	3.4024	-1.2427
BMS-345541	IKK inhibitor	IKBKB|CHUK	-0.4028	3.3991	-1.2426
adarotene	Retinoid receptor agonist	RARG|RARA|RARB	-0.4028	3.3975	-1.2425
quizartinib	FLT3 inhibitor	FLT3|CSF1R|KIT|RET|PDGFRA|PDGFRB	-0.4027	3.3929	-1.2422
gossypol	BCL inhibitor|MCL1 inhibitor	BCL2|BCL2L1|MCL1|BCL2L2|CTGF|EGF	-0.4027	3.3931	-1.2422
teniposide	Topoisomerase inhibitor	TOP2A|CYP3A5|TOP2B	-0.4027	3.3904	-1.2421
everolimus	MTOR inhibitor	MTOR|CYP3A5|FKBP1A	-0.4027	3.391	-1.2421
VE-821	ATR kinase inhibitor	ATR	-0.4026	3.3885	-1.242
AM-281	Cannabinoid receptor antagonist	CNR1|CNR2|GPR55	-0.4026	3.3868	-1.2419
BRD-K76064317	FLT3 inhibitor	FLT3	-0.4026	3.3874	-1.2419
BRD-K04546108	JAK inhibitor	JAK3	-0.4026	3.3879	-1.2419
cediranib	VEGFR inhibitor|KIT inhibitor	KDR|FLT1|FLT4|KIT|PDGFRB|CSF1R|FLT3|PDGFRA	-0.4024	3.378	-1.2414
PF-04691502	MTOR inhibitor|PI3K inhibitor	MTOR|PIK3CA|PIK3CB|PIK3CD|PIK3CG	-0.4023	3.3728	-1.2411
BIBX-1382	EGFR inhibitor|Tyrosine kinase inhibitor	EGFR|ERBB2	-0.4023	3.3676	-1.2408
ibrutinib	BTK inhibitor	BTK|BLK|BMX	-0.4022	3.3664	-1.2407
MK-2206	AKT inhibitor	AKT1|AKT2|AKT3	-0.4022	3.3648	-1.2406
BIX-02189	MEK inhibitor	MAP2K5|MAPK7	-0.4022	3.3624	-1.2405
floxuridine	DNA synthesis inhibitor	TYMS	-0.4022	3.3636	-1.2405
KPT-185	Exportin antagonist	XPO1	-0.402	3.3562	-1.2401
XMD-885	MAP kinase inhibitor	MAPK7|LRRK2	-0.402	3.3551	-1.24
SU-11274	HGF receptor inhibitor|Tyrosine kinase inhibitor	MET	-0.402	3.3521	-1.2398
adarotene	Retinoid receptor agonist	RARG|RARA|RARB	-0.4019	3.3477	-1.2396
PD-0325901	MEK inhibitor|MAP kinase inhibitor|Protein kinase inhibitor	MAP2K1|MAP2K2	-0.4018	3.342	-1.2393
bufalin	Na/K-ATPase inhibitor	ATP1A1	-0.4018	3.3423	-1.2393
etomoxir	Carnitine palmitoyltransferase inhibitor	CPT1A|CPT1B	-0.4017	3.3363	-1.2389
GDC-0980	MTOR inhibitor|PI3K inhibitor	MTOR|PIK3CG|FGR|MAP3K9|PIK3CA|PIK3CB|PIK3CD|SYK	-0.4015	3.3303	-1.2385
merimepodib	Inosine monophosphate dehydrogenase inhibitor	IMPDH1	-0.4015	3.3268	-1.2383
gefitinib	EGFR inhibitor	EGFR|CYP2C19	-0.4015	3.3272	-1.2383
lisinopril	ACE inhibitor	ACE|ACE2	-0.4014	3.325	-1.2382
STA-5326	Interleukin inhibitor	IL12A|IL12B|IL12RB1|IL12RB2|IL23A	-0.4014	3.3254	-1.2382
MD-920	NFKB inhibitor	AADACL2	-0.4014	3.3229	-1.2381
copanlisib	PI3K inhibitor	PIK3CA|PIK3CD|PIK3CB|PIK3CG	-0.4013	3.3195	-1.2379
LY-320135	Cannabinoid receptor antagonist	CNR1	-0.4013	3.3196	-1.2379
HU-211	Glutamate receptor antagonist	CNR1|CNR2|GRIN1	-0.4012	3.3162	-1.2377
CCT-018159	HSP inhibitor	HSP90AA1|HSP90AB1	-0.4013	3.3172	-1.2377
DDR1-IN-1	Discoidin domain receptor inhibitor	DDR1|DDR2	-0.4011	3.31	-1.2373
AZD-8055	MTOR inhibitor	MTOR	-0.4011	3.311	-1.2373
BX-912	PDK inhibitor	PDPK1|AKT2|CDK2|CHEK1|GSK3B|KDR|PDK1	-0.4011	3.3089	-1.2372
ASC-J9	Androgen receptor agonist	AR	-0.4011	3.3079	-1.2371
pimobendan	Calcium channel blocker|Phosphodiesterase inhibitor	PDE3A	-0.401	3.3057	-1.237
benzethonium	Sodium channel inhibitor	SCN9A|SCN10A	-0.401	3.3051	-1.2369
sirolimus	MTOR inhibitor	MTOR|FKBP1A|CCR5|FGF2	-0.4009	3.3014	-1.2367
YM-155	Survivin inhibitor	BIRC5	-0.4009	3.2994	-1.2366
ruxolitinib	JAK inhibitor	JAK1|JAK2|TYK2|JAK3	-0.4009	3.2995	-1.2366
PRT-062070	JAK inhibitor|Syk inhibitor	SYK	-0.4009	3.3005	-1.2366
LM-1685	Cyclooxygenase inhibitor	PTGS2	-0.4007	3.2894	-1.2359
riociguat	Guanylate cyclase activator	GUCY1A3|GUCY1B3|GUCY1A2|GUCY1B2	-0.4006	3.2857	-1.2357
GR-127935	Serotonin receptor antagonist	HTR1B|HTR1D|HTR1A|HTR2A|HTR2C|HTR1E|HTR1F|HTR2B|HTR6	-0.4006	3.2847	-1.2356
raltitrexed	Thymidylate synthase inhibitor	TYMS|FPGS	-0.4006	3.2849	-1.2356
puromycin	Protein synthesis inhibitor	RPL10L|RPL11|RPL13A|RPL15|RPL19|RPL23|RPL23A|RPL26L1|RPL3|RPL37|RPL8|RSL24D1|SNU13	-0.4005	3.2811	-1.2354
NU-7026	DNA inhibitor|MTOR inhibitor|PI3K inhibitor	PRKDC	-0.4005	3.2796	-1.2353
taselisib	PI3K inhibitor	PIK3CA|PIK3CB|PIK3CD|PIK3CG	-0.4005	3.2797	-1.2353
fluvastatin	HMGCR inhibitor	HMGCR|CYP2C8	-0.4005	3.2799	-1.2353
pitavastatin	HMGCR inhibitor	HMGCR|APOA1|CYP2C8	-0.4005	3.2806	-1.2353
EPZ-015666	PRMT inhibitor	PRMT5	-0.4004	3.2762	-1.2351
prochlorperazine	Dopamine receptor antagonist	DRD2|DRD1|DRD3|DRD4	-0.4004	3.2754	-1.235
astemizole	Histamine receptor antagonist	HRH1|KCNH2|CYP2J2|CYP3A5|KCNH1	-0.4004	3.2746	-1.2349
minoxidil	KATP activator|Vasodilator	ABCC9|KCNJ8|KCNJ11|REN|KCNJ1|KCNJ10|PTGS1	-0.4002	3.2665	-1.2344
adapalene	Retinoid receptor agonist	RARB|RARG|RARA|RXRA|RXRB|RXRG	-0.4002	3.2671	-1.2344
nortriptyline	Tricyclic antidepressant	KCNJ10|SLC6A2|SLC6A4|CYP2C19|PIK3CD|ADRA1A|ADRA1B|ADRA1D|ADRA2A|ADRA2B|ADRA2C|ADRB1|ADRB2|ADRB3|CHRM1|CHRM2|CHRM3|CHRM4|CHRM5|DRD2|HRH1|HTR1A|HTR2A|HTR2C|HTR6|PGRMC1|SIGMAR1	-0.4	3.2602	-1.234
PFI-1	Bromodomain inhibitor	BRD4	-0.4001	3.2611	-1.234
BRD-A49680073	JAK inhibitor|Lipocortin synthesis stimulant|STAT inhibitor	JAK2|STAT3	-0.4	3.2601	-1.2339
SCH-79797	Proteasome inhibitor	F2R	-0.3999	3.2518	-1.2334
clotrimazole	Cytochrome P450 inhibitor|Imidazoline ligand	KCNN4|CYP51A1|CYP3A4|NR1I2|NR1I3|TRPM2|TRPM4|TRPM8	-0.3998	3.2509	-1.2333
AT-7519	CDK inhibitor|Cell cycle inhibitor	CDK2|CDK1|CDK9|CDK4|CDK5|CDK6	-0.3997	3.2459	-1.233
benzethonium	Sodium channel inhibitor	SCN9A|SCN10A	-0.3997	3.2437	-1.2328
pimobendan	Calcium channel blocker|Phosphodiesterase inhibitor	PDE3A	-0.3996	3.241	-1.2326
sunitinib	FLT3 inhibitor|KIT inhibitor|PDGFR inhibitor|RET inhibitor|VEGFR inhibitor	PDGFRB|FLT1|FLT3|FLT4|KDR|KIT|PDGFRA|RET	-0.3996	3.2411	-1.2326
oligomycin-a	ATP synthase inhibitor|ATPase inhibitor	ATP5A1	-0.3996	3.2389	-1.2325
IBC-293	Hydroxycarboxylic acid receptor agonist	HCAR3	-0.3996	3.2392	-1.2325
KU-0063794	MTOR inhibitor	MTOR	-0.3995	3.2359	-1.2323
tacrolimus	Calcineurin inhibitor	FKBP1A|CYP3A5|CYP3A7	-0.3994	3.2324	-1.232
JWE-035	Aurora kinase inhibitor	AURKA	-0.3993	3.2276	-1.2317
LY-294002	MTOR inhibitor|DNA dependent protein kinase inhibitor|Phosphodiesterase inhibitor|PLK inhibitor	MTOR|PIK3CD|PIK3CG|PIK3CA|PLK1|PRKDC|PIK3CB|PDE2A|AKT1|CHEK1|GSK3B|LCK|MAPK1|MAPK11|MAPK12|MAPK14|MAPK8|PRKCA|ROCK1|RPS6KB1|SGK1	-0.3993	3.2266	-1.2316
oxyquinoline	Chelating agent	METAP2	-0.3993	3.2272	-1.2316
bithionol	Autotaxin inhibitor	ESR1|ESR2|MCL1	-0.3992	3.2248	-1.2315
BMS-536924	IGF-1 inhibitor	IGF1R|INSR|AKT1|CCNE1|CDK2|CYP3A4|ERBB2|KDR|LCK|MAPK1|MET|PDGFRA|PDGFRB	-0.3992	3.2244	-1.2314
pyroxamide	HDAC inhibitor	HDAC1	-0.3992	3.2228	-1.2313
rucaparib	PARP inhibitor	PARP1|PARP2	-0.3992	3.2218	-1.2312
PP-2	Src inhibitor	SRC|LCK|ABL1|LYN|RIPK2	-0.3992	3.222	-1.2312
BX-795	IKK inhibitor	PDPK1|IKBKE|TBK1|CDK2|CHEK1|GSK3B|KDR|PDK1	-0.3991	3.2193	-1.2311
LY-215490	Glutamate receptor antagonist	GRIA1|GRIA2|GRIA3|GRIA4|GRIK1	-0.3991	3.2202	-1.2311
mubritinib	Receptor tyrosine protein kinase inhibitor	ERBB2|EGFR	-0.3991	3.2185	-1.231
BRD-K48195008	Estrogen receptor agonist|Estrogenic hormone	ESR1|CYP2C8|ESR2|NR1I2	-0.399	3.2144	-1.2307
midostaurin	FLT3 inhibitor|KIT inhibitor|PKC inhibitor	FLT3|KIT|CCNB1|FLT1|KDR|PDGFRB|PRKCA|VEGFA|PRKCG	-0.3989	3.2117	-1.2305
BMS-754807	IGF-1 inhibitor	IGF1R|AKT1	-0.3989	3.2098	-1.2304
adapalene	Retinoid receptor agonist	RARB|RARG|RARA|RXRA|RXRB|RXRG	-0.3989	3.2088	-1.2303
CP-724714	Tyrosine kinase inhibitor|EGFR inhibitor	ERBB2	-0.3989	3.2091	-1.2303
PF-03814735	Aurora kinase inhibitor	AURKA|AURKB	-0.3989	3.2094	-1.2303
NVP-BHG712	Ephrin inhibitor	EPHB4	-0.3989	3.2095	-1.2303
phenolphthalein	Indicator dye	UGT1A9	-0.3988	3.2079	-1.2302
U-0126	MEK inhibitor	MAP2K1|MAP2K2|JAK2|AKT1|CHEK1|GSK3B|LCK|MAP2K7|MAPK1|MAPK11|MAPK12|MAPK14|MAPK8|PRKCA|RAF1|ROCK1|RPS6KB1|SGK1	-0.3988	3.2062	-1.2301
ibrutinib	BTK inhibitor	BTK|BLK|BMX	-0.3988	3.2067	-1.2301
KF-38789	P selectin inhibitor	SELP	-0.3987	3.203	-1.2298
carbimazole	Antithyroid agent	TPO	-0.3987	3.2005	-1.2297
entinostat	HDAC inhibitor	HDAC1|HDAC2|HDAC3|HDAC9	-0.3986	3.1996	-1.2296
piclamilast	Phosphodiesterase inhibitor	PDE4A|PDE4B|PDE4D|PDE4C	-0.3986	3.1983	-1.2295
lomitapide	Microsomal trigylceride transfer protein inhibitor	MTTP|CYP2B6|CYP2C19|CYP2C8	-0.3985	3.196	-1.2293
methylene-blue	Nitric oxide production inhibitor|Guanylyl cyclase inhibitor|Monoamine oxidase inhibitor|Tau aggregation inhibitor	ACHE|MAPT	-0.3985	3.1936	-1.2291
CGS-15943	Adenosine receptor antagonist	ADORA1|ADORA2A|ADORA2B|ADORA3	-0.3984	3.1901	-1.2289
adapalene	Retinoid receptor agonist	RARB|RARG|RARA|RXRA|RXRB|RXRG	-0.3984	3.1903	-1.2289
prazosin	Adrenergic receptor antagonist	ADRA1A|ADRA1B|ADRA1D|ADRA2A|ADRA2B|ADRA2C|CDK1|KCNH2|KCNH6|KCNH7	-0.3984	3.1904	-1.2289
PD-198306	MAP kinase inhibitor|MEK inhibitor	MAPK1|MAPK3|MAP2K1|MAP2K2	-0.3984	3.1891	-1.2288
NVP-TAE226	Protein tyrosine kinase inhibitor	IGF1R|PTK2	-0.3983	3.1877	-1.2287
floxuridine	DNA synthesis inhibitor	TYMS	-0.3984	3.1887	-1.2287
alvespimycin	HSP inhibitor	HSP90AA1	-0.3982	3.1828	-1.2283
PP-1	Src inhibitor|Abl inhibitor	SRC|HCK|RET	-0.3982	3.1805	-1.2281
GDC-0068	AKT inhibitor	AKT1|AKT2|AKT3|CYP3A5|PRKG1	-0.398	3.176	-1.2278
BRD-K68202742	HDAC inhibitor|CDK expression enhancer|ID1 expression inhibitor	HDAC1|HDAC3|HDAC4|HDAC6|HDAC7|HDAC8|HDAC10|HDAC2|HDAC5|HDAC9	-0.398	3.175	-1.2277
eltrombopag	Thrombopoietin receptor agonist	MPL|CYP2C8	-0.398	3.1756	-1.2277
nobiletin	MEK inhibitor	ABCB1|TYR|MAP2K1	-0.3979	3.1723	-1.2275
menadione	Mitochondrial inhibitor|Phosphatase inhibitor	PKM|AOX1|BGLAP|F10|F2|F7|F9|GGCX|NQO1|NQO2|PROC|PROS1|PROZ|VKORC1|VKORC1L1	-0.398	3.173	-1.2275
strophanthidin	Na/K-ATPase inhibitor	ATP1A1	-0.398	3.173	-1.2275
lavendustin-c	EGFR inhibitor	CAMK2A|EGFR|SRC	-0.3979	3.1696	-1.2273
mycophenolate-mofetil	Inosine monophosphate dehydrogenase inhibitor|Dehydrogenase inhibitor|Hydroxycarboxylic acid receptor agonist|Immunosuppressant|Inositol monophosphatase inhibitor	IMPDH1|IMPDH2|HCAR2	-0.3978	3.1684	-1.2272
YM-90709	IL5 inhibitor	IL5RA|CSF2RB	-0.3978	3.167	-1.2271
methylnaltrexone	Opioid receptor antagonist	OPRM1|OPRK1|OPRD1	-0.3978	3.1662	-1.227
PF-05212384	MTOR inhibitor|PI3K inhibitor	MTOR|PIK3CA|PIK3CG	-0.3978	3.1665	-1.227
BX-795	IKK inhibitor	PDPK1|IKBKE|TBK1|CDK2|CHEK1|GSK3B|KDR|PDK1	-0.3978	3.1666	-1.227
EPZ-5676	DOT1L inhibitor	DOT1L	-0.3977	3.1641	-1.2268
BRD-K59573506	Androgen receptor antagonist|Progesterone receptor agonist|Testosterone receptor antagonist	AR|ADORA1	-0.3977	3.1623	-1.2267
BIBR-1532	Telomerase inhibitor	TERT	-0.3976	3.1605	-1.2266
navitoclax	BCL inhibitor	BCL2|BCL2L1|BCL2L2	-0.3977	3.161	-1.2266
nilotinib	Bcr-Abl inhibitor|Abl inhibitor	ABL1|KIT|BCR|CYP2B6|CYP2C8|DDR1|DDR2|PDGFRA	-0.3977	3.1616	-1.2266
AZD-6482	PI3K inhibitor	PIK3CB|PIK3CD|PIK3CG|PIK3CA	-0.3976	3.1602	-1.2265
OTX-015	Bromodomain inhibitor	BRD2|BRD3|BRD4|SELE|VCAM1	-0.3976	3.1584	-1.2264
vorinostat	HDAC inhibitor	HDAC1|HDAC2|HDAC3|HDAC6|HDAC8|HDAC10|HDAC11|HDAC5|HDAC9	-0.3976	3.159	-1.2264
cebranopadol	Opioid receptor agonist	OPRL1|OPRM1	-0.3976	3.1579	-1.2263
AT-7867	AKT inhibitor	AKT2|ROCK2|GSK3B|PKIA|PRKACA	-0.3975	3.1546	-1.2261
bifonazole	Sterol demethylase inhibitor	CYP2B6	-0.3974	3.1508	-1.2258
cerivastatin	HMGCR inhibitor	HMGCR	-0.3973	3.1484	-1.2256
isoconazole	Fungal lanosterol demethylase inhibitor	CYP17A1	-0.3973	3.147	-1.2255
PF-431396	Focal adhesion kinase inhibitor	PTK2|PTK2B	-0.3972	3.1452	-1.2253
epirubicin	Topoisomerase inhibitor	TOP2A|CHD1	-0.3971	3.1388	-1.2248
digitoxin	Na/K-ATPase inhibitor	ATP1A1	-0.3971	3.1388	-1.2248
acivicin	Gamma glutamyltransferase Inhibitors	CAD|GGT1|CTPS1	-0.397	3.136	-1.2246
calcitriol	Vitamin D receptor agonist	VDR|CYP3A5	-0.3969	3.1324	-1.2243
triflupromazine	Dopamine receptor antagonist	DRD2|HTR2B|CHRNA7|CHRM1|CHRM2|DRD1	-0.3969	3.133	-1.2243
BIX-01294	DNA inhibitor|Histone lysine methyltransferase inhibitor	EHMT2|EHMT1	-0.3969	3.1319	-1.2242
dovitinib	EGFR inhibitor|FGFR inhibitor|FLT3 inhibitor|PDGFR inhibitor|VEGFR inhibitor	FGFR1|FLT1|KDR|EGFR|FGFR3|FLT3|FLT4|KIT|PDGFRB|CSF1R|FGFR2|INSR|PDGFRA	-0.3969	3.1319	-1.2242
Y-134	Estrogen receptor antagonist	ESR1|ESR2	-0.3968	3.1289	-1.224
AS-703026	MEK inhibitor	MAP2K1|MAP2K2	-0.3968	3.1291	-1.224
bisindolylmaleimide-ix	PKC inhibitor	SIRT1|LRRK2|SIRT2|AKT1|GSK3B|LCK|MAPK1|MAPK11|MAPK12|MAPK14|MAPK8|PRKCA|ROCK1|RPS6KB1	-0.3967	3.124	-1.2236
taltirelin	Thyrotropin releasing hormone receptor agonist	TRHR	-0.3967	3.1249	-1.2236
pimavanserin	Serotonin receptor antagonist	HTR2A|DRD2	-0.3966	3.1221	-1.2234
BRD-K72783841	EGFR inhibitor	EGFR	-0.3966	3.1203	-1.2233
ORG-9768	Adrenergic receptor antagonist	SLC6A2|ADRA2A	-0.3966	3.1202	-1.2232
MG-132	Proteasome inhibitor	PSMB1	-0.3965	3.1173	-1.223
KU-C103871	GSP agonist	SMAD3	-0.3965	3.1157	-1.2229
daunorubicin	RNA synthesis inhibitor|Topoisomerase inhibitor	TOP2A|TOP2B	-0.3964	3.1149	-1.2228
SU-11652	Tyrosine kinase inhibitor	KDR|PDGFRB	-0.3964	3.1135	-1.2227
imipramine	Norepinephrine inhibitor|Serotonin reuptake inhibitor	SLC6A2|SLC6A4|CHRM2|CYP2C19|ADRA1A|ADRA1B|ADRA1D|CHRM1|CHRM3|CHRM4|CHRM5|DRD1|DRD2|DRD5|HRH1|HTR1A|HTR2A|HTR2C|HTR6|HTR7|KCND2|KCND3|KCNH1|KCNH2|SLC6A3	-0.3963	3.1089	-1.2223
GDC-0941	PI3K inhibitor	PIK3CG|PIK3CA|PIK3CB|PIK3CD	-0.3963	3.1094	-1.2223
crizotinib	ALK inhibitor	ALK|MET|CYP2B6|CYP3A5|MST1R|ROS1	-0.3963	3.1095	-1.2223
nilotinib	Bcr-Abl inhibitor|Abl inhibitor	ABL1|KIT|BCR|CYP2B6|CYP2C8|DDR1|DDR2|PDGFRA	-0.3962	3.1074	-1.2222
bisbenzimide	DNA binding agent	TOP1	-0.3962	3.1076	-1.2222
AZD-5438	CDK inhibitor	CCNB1|CCNE1|CDK1|CDK2|KCNH2	-0.3962	3.1063	-1.2221
ponatinib	Bcr-Abl inhibitor|FLT3 inhibitor|PDGFR inhibitor	ABL1|BCR|FLT3|RET|FGFR1|FGFR2|FGFR3|FGFR4|KIT|TEK|CYP2C8|CYP3A5|FGF2|FLT1|KDR|LCK|LYN|PDGFRA|SRC	-0.3961	3.1047	-1.2219
berbamine	Calmodulin inhibitor	CALM1	-0.3961	3.1016	-1.2216
PETCM	Caspase activator	CASP3	-0.396	3.0998	-1.2215
idelalisib	PI3K inhibitor	PIK3CD|PIK3CG|CCL3|CCL4|PIK3CA|PIK3CB	-0.3959	3.0975	-1.2213
adarotene	Retinoid receptor agonist	RARG|RARA|RARB	-0.3959	3.0976	-1.2213
allopurinol	Xanthine oxidase inhibitor	XDH	-0.3959	3.0976	-1.2213
quetiapine	Dopamine receptor antagonist|Serotonin receptor antagonist	DRD2|HTR1A|HTR2A|DRD1|HRH1|HTR1D|HTR1E|ADRA1A|ADRA1B|ADRA1D|ADRA2A|ADRA2B|ADRA2C|CHRM1|CHRM2|CHRM3|CHRM4|CHRM5|DRD3|DRD4|DRD5|HTR1B|HTR1F|HTR2C|HTR3A|HTR6|HTR7|SLC6A2	-0.3959	3.0955	-1.2211
loperamide	Opioid receptor agonist	OPRM1|OPRD1|CYP2B6|CYP2C8|NPR2|CACNA1A|CALM1|OPRK1|POMC	-0.3957	3.0907	-1.2207
MLN-8054	Aurora kinase inhibitor|Protein kinase inhibitor|Tubulin inhibitor	AURKA	-0.3957	3.0897	-1.2206
CD-437	Retinoid receptor agonist	RARG	-0.3957	3.0881	-1.2205
NVP-BGJ398	FGFR inhibitor	FGFR1|FGFR2|FGFR3|FGFR4|KDR	-0.3957	3.0882	-1.2205
epirubicin	Topoisomerase inhibitor	TOP2A|CHD1	-0.3957	3.0876	-1.2204
betamethasone-acetate	Glucocorticoid receptor agonist	NR3C1	-0.3956	3.086	-1.2203
doxorubicin	Topoisomerase inhibitor	TOP2A	-0.3956	3.0855	-1.2202
alpelisib	PI3K inhibitor	PIK3CA|PIK3CB|PIK3CD|PIK3CG	-0.3956	3.0845	-1.2201
SU-11652	Tyrosine kinase inhibitor	KDR|PDGFRB	-0.3955	3.0816	-1.2199
vorinostat	HDAC inhibitor	HDAC1|HDAC2|HDAC3|HDAC6|HDAC8|HDAC10|HDAC11|HDAC5|HDAC9	-0.3954	3.0796	-1.2197
delanzomib	Proteasome inhibitor	CMA1|CTSG|CYP3A4|ELANE	-0.3954	3.0798	-1.2197
famotidine	Histamine receptor antagonist	HRH2	-0.3953	3.0771	-1.2195
AZD-4547	FGFR inhibitor	FGF2|FGFR1|FGFR2|FGFR3|FGFR4|IGF1R|KDR	-0.3954	3.0777	-1.2195
mycophenolate-mofetil	Inosine monophosphate dehydrogenase inhibitor|Dehydrogenase inhibitor|Hydroxycarboxylic acid receptor agonist|Immunosuppressant|Inositol monophosphatase inhibitor	IMPDH1|IMPDH2|HCAR2	-0.3954	3.0781	-1.2195
SB-242235	P38 MAPK inhibitor	HSPB1|MAPK14	-0.3953	3.0766	-1.2194
clomipramine	Serotonin receptor antagonist	SLC6A4|SLC6A2|CYP2C19|GSTP1|HTR2A|HTR2B|HTR2C|SLC6A3	-0.3952	3.0739	-1.2191
sumatriptan	Serotonin receptor agonist	HTR1D|HTR1B|HTR1A|HTR1F|HTR1E|HTR5A|HTR6|HTR7	-0.3952	3.0723	-1.219
phloretin	Sodium channel inhibitor	AQP9|CLCN3|SLC23A1	-0.3951	3.0707	-1.2189
erteberel	Estrogen receptor agonist	ESR2|ESR1	-0.3952	3.0712	-1.2189
simvastatin	HMGCR inhibitor	HMGCR|CYP2C8|CYP3A4|CYP3A5|ITGB2	-0.3951	3.0698	-1.2188
AS-703026	MEK inhibitor	MAP2K1|MAP2K2	-0.395	3.0649	-1.2183
PF-03758309	P21 activated kinase inhibitor	PAK4	-0.395	3.0652	-1.2183
picotamide	Thromboxane receptor antagonist|Thromboxane synthase inhibitor	TBXA2R|TBXAS1	-0.3949	3.0634	-1.2182
everolimus	MTOR inhibitor	MTOR|CYP3A5|FKBP1A	-0.3949	3.0624	-1.2181
cabozantinib	RET inhibitor|VEGFR inhibitor	KDR|MET|FLT3|KIT|RET|TEK|CYP2C19	-0.3949	3.0612	-1.218
crizotinib	ALK inhibitor	ALK|MET|CYP2B6|CYP3A5|MST1R|ROS1	-0.3948	3.0602	-1.2179
salermide	SIRT inhibitor	SIRT1|SIRT2	-0.3948	3.0608	-1.2179
DY-131	Estrogen receptor agonist	ESRRG|ESRRB|ESR2	-0.3947	3.0567	-1.2176
TG-101348	JAK inhibitor|FLT3 inhibitor	JAK2|FLT3|RET|BRD4|JAK1|JAK3|TYK2	-0.3947	3.0568	-1.2176
bisphenol-a	Synthetic estrogen	PPARG|AR|ESR1|ESR2|ESRRG	-0.3947	3.0561	-1.2175
PNU-74654	Beta catenin inhibitor	CTNNB1|TCF4	-0.3947	3.0555	-1.2174
bortezomib	NFKB inhibitor|Proteasome inhibitor	PSMB5|PSMB1|PSMB2|CASP3|CYP2C19|NFKB1|PSMA1|PSMA2|PSMA3|PSMA4|PSMA5|PSMA6|PSMA7|PSMA8|PSMB10|PSMB11|PSMB3|PSMB4|PSMB6|PSMB7|PSMB8|PSMB9|PSMD1|PSMD2|RELA	-0.3946	3.0535	-1.2172
floxuridine	DNA synthesis inhibitor	TYMS	-0.3945	3.0487	-1.2168
wiskostatin	Neural Wiskott-Aldrich syndrome protein inhibitor	WAS|WASL	-0.3944	3.0464	-1.2166
Ro-28-1675	Glucokinase activator	GCK	-0.3944	3.0464	-1.2166
neratinib	EGFR inhibitor	EGFR|ERBB2|ERBB4|KDR	-0.3944	3.0469	-1.2166
menadione	Mitochondrial inhibitor|Phosphatase inhibitor	PKM|AOX1|BGLAP|F10|F2|F7|F9|GGCX|NQO1|NQO2|PROC|PROS1|PROZ|VKORC1|VKORC1L1	-0.3943	3.0443	-1.2164
irinotecan	Topoisomerase inhibitor	TOP1|CYP3A5|TOP1MT	-0.3943	3.0429	-1.2162
mocetinostat	HDAC inhibitor	HDAC1|HDAC2|HDAC3|HDAC11	-0.3943	3.043	-1.2162
masoprocol	Lipoxygenase inhibitor	ALOX5|IGF1R	-0.3942	3.0395	-1.2159
doxorubicin	Topoisomerase inhibitor	TOP2A	-0.3942	3.0397	-1.2159
netupitant	Tachykinin antagonist	TACR1	-0.3942	3.04	-1.2159
orphenadrine	Acetylcholine receptor antagonist	CYP2B6|GRIN1|GRIN2D|GRIN3A|GRIN3B|HRH1|SCN10A|SLC6A2	-0.3941	3.0381	-1.2158
KIN001-244	PDK1 Inhibitor	PDPK1	-0.3942	3.0386	-1.2158
rhamnetin	Aldose reductase inhibitor	ALOX5	-0.3941	3.0362	-1.2156
terfenadine	Histamine receptor antagonist	HRH1|KCNH2|CHRM1|CHRM2|CHRM3|CHRM4|CHRM5|KCNH1	-0.3941	3.0369	-1.2156
protriptyline	Tricyclic antidepressant	SLC6A2|SLC6A4	-0.3941	3.0359	-1.2155
streptozotocin	DNA alkylating agent	SLC2A2	-0.3941	3.0361	-1.2155
estradiol-cypionate	Estrogen receptor agonist	ESR1	-0.3941	3.0361	-1.2155
spironolactone	Mineralocorticoid receptor antagonist	NR3C2|KCNA5|KCND3|SCNN1A|AR|CACNA1A|CACNA1B|CACNA1C|CACNA1D|CACNA1F|CACNA1G|CACNA1H|CACNA1I|CACNA1S|CACNA2D1|CACNA2D2|CACNA2D3|CACNB1|CACNB2|CACNB3|CACNB4|CACNG1|CYP11B2|NR3C1|PGR|SHBG	-0.394	3.0352	-1.2154
mitoxantrone	Topoisomerase inhibitor	TOP2A|PIM1	-0.394	3.0326	-1.2152
puromycin	Protein synthesis inhibitor	RPL10L|RPL11|RPL13A|RPL15|RPL19|RPL23|RPL23A|RPL26L1|RPL3|RPL37|RPL8|RSL24D1|SNU13	-0.3939	3.0318	-1.2151
fingolimod	Immunosuppressant|Sphingosine 1 phosphate receptor agonist	S1PR1|S1PR5|S1PR3|S1PR4|CYP2E1|CYP4F2|SPHK1	-0.3939	3.0294	-1.2149
cyclosporin-a	Calcineurin inhibitor	PPIA|PPP3CA	-0.3939	3.0296	-1.2149
midostaurin	FLT3 inhibitor|KIT inhibitor|PKC inhibitor	FLT3|KIT|CCNB1|FLT1|KDR|PDGFRB|PRKCA|VEGFA|PRKCG	-0.3938	3.0275	-1.2147
PF-05212384	MTOR inhibitor|PI3K inhibitor	MTOR|PIK3CA|PIK3CG	-0.3938	3.0273	-1.2146
rofecoxib	Cyclooxygenase inhibitor	PTGS2|CYP3A4|ELN	-0.3937	3.0238	-1.2143
teniposide	Topoisomerase inhibitor	TOP2A|CYP3A5|TOP2B	-0.3936	3.0226	-1.2142
tioconazole	Sterol demethylase inhibitor	CYP51A1	-0.3936	3.0229	-1.2142
HU-211	Glutamate receptor antagonist	CNR1|CNR2|GRIN1	-0.3936	3.0218	-1.2141
lomitapide	Microsomal trigylceride transfer protein inhibitor	MTTP|CYP2B6|CYP2C19|CYP2C8	-0.3936	3.0207	-1.214
YM-155	Survivin inhibitor	BIRC5	-0.3935	3.0201	-1.2139
GSK-269962	Rho associated kinase inhibitor	ROCK1|ROCK2	-0.3934	3.0164	-1.2135
RS-504393	CC chemokine receptor antagonist	CCR2|CCL2	-0.3934	3.0153	-1.2134
piceid	Glucosidase inhibitor	XDH	-0.3933	3.0129	-1.2132
SU-11652	Tyrosine kinase inhibitor	KDR|PDGFRB	-0.3933	3.0118	-1.2131
BMS-265246	CDK inhibitor	CDK1|CDK2|CCNE1	-0.3933	3.0125	-1.2131
dephostatin	Tyrosine phosphatase inhibitor	PTPN1|PTPN6	-0.3932	3.0104	-1.2129
halofantrine	Antimalarial	CYP3A5|KCNH2|KCNN4	-0.3932	3.0084	-1.2127
alverine	Muscle relaxant	HTR1A	-0.3932	3.0085	-1.2127
NNC-55-0396	Calcium channel blocker	CATSPER1|CATSPER2|CATSPER3|CATSPER4	-0.3931	3.0061	-1.2125
daunorubicin	RNA synthesis inhibitor|Topoisomerase inhibitor	TOP2A|TOP2B	-0.3931	3.0051	-1.2124
BAY-11-7082	NFKB inhibitor	RELA	-0.3929	3.002	-1.2121
taranabant	Cannabinoid receptor antagonist	CNR1	-0.3929	3.0004	-1.2119
mifepristone	Glucocorticoid receptor antagonist|Progesterone receptor antagonist	PGR|NR3C1|AR|CYP2B6|CYP2C8|CYP3A5|CYP3A7|NR1I2	-0.3928	2.9983	-1.2117
GDC-0941	PI3K inhibitor	PIK3CG|PIK3CA|PIK3CB|PIK3CD	-0.3928	2.9984	-1.2117
PCI-29732	BTK inhibitor	BTK	-0.3928	2.9964	-1.2115
embelin	HCV inhibitor|XIAP inhibitor	XIAP	-0.3928	2.9967	-1.2115
phenylbutyrate	HDAC inhibitor	CYP3A5|HDAC1	-0.3927	2.9945	-1.2113
thapsigargin	ATPase inhibitor	ATP2A1	-0.3927	2.9951	-1.2113
BRL-37344	Adrenergic receptor agonist	ADRB3|ADRB1|ADRB2	-0.3927	2.9933	-1.2112
PK-11195	Benzodiazepine receptor antagonist	TSPO|NR1I2|NR1I3	-0.3927	2.994	-1.2112
ABT-724	Dopamine receptor agonist	DRD4	-0.3927	2.9942	-1.2112
sitagliptin	Dipeptidyl peptidase inhibitor	DPP4|CYP2C8|FASLG|HMGCR|SLC22A8	-0.3927	2.9933	-1.2111
LY-2090314	GSK inhibitor	GSK3B	-0.3926	2.9923	-1.211
methotrexate	Dihydrofolate reductase inhibitor	DHFR|AOX1|FOLR1|TYMS	-0.3926	2.9913	-1.2109
amantadine	Glutamate receptor antagonist	GRIN1|DRD2|GRIN2A|GRIN2B|GRIN2C|GRIN2D|GRIN3A	-0.3925	2.9899	-1.2108
tubastatin-a	HDAC inhibitor	HDAC6	-0.3925	2.989	-1.2107
cytarabine	Ribonucleoside reductase inhibitor	POLA1|POLB|POLD1|POLE	-0.3925	2.988	-1.2106
rifabutin	Bacterial protein synthesis inhibitor	CYP3A4|HSP90AA1|HSP90B1	-0.3924	2.9872	-1.2105
GW-1929	PPAR receptor agonist|Insulin sensitizer	PPARG|INS	-0.3924	2.9849	-1.2103
acyclovir	DNA inhibitor	PNP	-0.3924	2.9857	-1.2103
NSC-3852	HDAC inhibitor	HDAC1	-0.3923	2.9838	-1.2101
levomequitazine	Histamine receptor antagonist	HRH1|HRH4|PDE4A	-0.3922	2.9797	-1.2097
GW-7647	PPAR receptor agonist	PPARA	-0.3922	2.9798	-1.2097
fluticasone	Glucocorticoid receptor agonist	NR3C1|PGR	-0.3922	2.98	-1.2097
DMBI	PDGFR inhibitor|VEGFR inhibitor	PDGFRB	-0.3921	2.9784	-1.2096
teniposide	Topoisomerase inhibitor	TOP2A|CYP3A5|TOP2B	-0.3921	2.9785	-1.2096
scriptaid	HDAC inhibitor	HDAC1|HDAC2|HDAC3|HDAC4|HDAC5|HDAC6|HDAC7|HDAC8|HDAC9	-0.3921	2.9785	-1.2096
ZG-10	JNK inhibitor	IRAK1	-0.3922	2.9792	-1.2096
PX-12	Thioredoxin inhibitor	TXN|TXNRD1|TXNRD2	-0.3921	2.9781	-1.2095
sertindole	Dopamine receptor antagonist|Serotonin receptor antagonist	DRD2|HTR2A|HTR2C|ADRA1A|ADRA1B|ADRA1D|DRD3|DRD4|HRH1|HTR1A|HTR1B|HTR1D|HTR1E|HTR1F|HTR6|KCNH2	-0.3921	2.9762	-1.2093
PSB-1115	Adenosine receptor antagonist	ADORA2B|ADORA1|ADORA3	-0.392	2.9754	-1.2092
flunisolide	Cytochrome P450 inhibitor	NR3C1	-0.392	2.9744	-1.2091
GDC-0199	BCL inhibitor	BCL2	-0.392	2.9746	-1.2091
Ro-28-1675	Glucokinase activator	GCK	-0.3919	2.9715	-1.2088
neratinib	EGFR inhibitor	EGFR|ERBB2|ERBB4|KDR	-0.3919	2.972	-1.2088
CEP-32496	RAF inhibitor	BRAF|EGFR|RAF1	-0.3918	2.9706	-1.2087
FK-888	Tachykinin antagonist	TACR1|TACR2	-0.3919	2.9707	-1.2087
NVP-AUY922	HSP inhibitor	HSP90AA1|HSP90AB1	-0.3919	2.9708	-1.2087
etravirine	Non-nucleoside reverse transcriptase inhibitor	CYP2C19|CYP3A4|CYP2C9	-0.3919	2.9711	-1.2087
reversine	Aurora kinase inhibitor	AURKB|ADORA3|AURKA|INCENP|MAP2K1	-0.3918	2.9696	-1.2086
Merck60	HDAC inhibitor	HDAC1|HDAC2	-0.3918	2.9703	-1.2086
PHA-848125	CDK inhibitor|Growth factor receptor inhibitor	CDK2|CDK4|NTRK1|CDK1|CDK5|CDK7	-0.3918	2.9688	-1.2085
FIT	Opioid receptor agonist	OPRD1	-0.3918	2.9689	-1.2085
bexarotene	Retinoid receptor agonist	RXRA|RXRB|RXRG|ABCA1|CYP2C8|CYP3A4	-0.3918	2.9682	-1.2084
rebastinib	Bcr-Abl inhibitor|TIE tyrosine kinase inhibitor|VEGFR inhibitor	ABL1|BCR|FLT3|FGR|HCK|KDR|LYN|TEK|SRC	-0.3917	2.9671	-1.2083
regorafenib	FGFR inhibitor|KIT inhibitor|PDGFR inhibitor|RAF inhibitor|RET inhibitor|VEGFR inhibitor	KDR|KIT|RET|FLT1|FLT4|PDGFRA|TEK|BRAF|ABL1|DDR2|FGFR1|FGFR2|FRK|MAPK11|PDGFRB|RAF1|CYP2B6|CYP2C19|CYP2C8|FGF2|EPHA2|NTRK1	-0.3916	2.9647	-1.208
pyrimethamine	Dihydrofolate reductase inhibitor	DHFRP1|HEXA|STAT3|DHFR|SLC47A1	-0.3916	2.9624	-1.2078
eltrombopag	Thrombopoietin receptor agonist	MPL|CYP2C8	-0.3916	2.9626	-1.2078
GR-127935	Serotonin receptor antagonist	HTR1B|HTR1D|HTR1A|HTR2A|HTR2C|HTR1E|HTR1F|HTR2B|HTR6	-0.3915	2.9615	-1.2077
doxapram	Potassium channel antagonist	KCNK3|KCNK9	-0.3915	2.961	-1.2076
GW-405833	Cannabinoid receptor agonist	CNR2	-0.3915	2.96	-1.2075
CP-724714	Tyrosine kinase inhibitor|EGFR inhibitor	ERBB2	-0.3914	2.959	-1.2074
loperamide	Opioid receptor agonist	OPRM1|OPRD1|CYP2B6|CYP2C8|NPR2|CACNA1A|CALM1|OPRK1|POMC	-0.3914	2.957	-1.2072
regorafenib	FGFR inhibitor|KIT inhibitor|PDGFR inhibitor|RAF inhibitor|RET inhibitor|VEGFR inhibitor	KDR|KIT|RET|FLT1|FLT4|PDGFRA|TEK|BRAF|ABL1|DDR2|FGFR1|FGFR2|FRK|MAPK11|PDGFRB|RAF1|CYP2B6|CYP2C19|CYP2C8|FGF2|EPHA2|NTRK1	-0.3912	2.9523	-1.2066
phenprocoumon	Vitamin K antagonist	VKORC1	-0.3911	2.9507	-1.2065
Merck60	HDAC inhibitor	HDAC1|HDAC2	-0.3911	2.9501	-1.2064
importazole	Importin inhibitor	KPNB1	-0.3911	2.9502	-1.2064
AG-14361	PARP inhibitor	PARP1	-0.3911	2.9488	-1.2063
bithionol	Autotaxin inhibitor	ESR1|ESR2|MCL1	-0.3911	2.949	-1.2063
DMAB-anabaseine	Adrenergic receptor agonist	CHRNA7	-0.3911	2.949	-1.2063
R-547	CDK inhibitor	CDK2|CDK1|CDK4|CCND1|CCNE1|CDK7	-0.391	2.9473	-1.2061
GW-3965	LXR agonist|ABC transporter expression enhancer	NR1H2|NR1H3|ABCA1	-0.3909	2.9455	-1.2059
acivicin	Gamma glutamyltransferase Inhibitors	CAD|GGT1|CTPS1	-0.391	2.9458	-1.2059
IKK-16	IKK inhibitor	IKBKB	-0.391	2.9459	-1.2059
BRD-K47000838	Tubulin inhibitor	ACTB	-0.3908	2.9422	-1.2056
sirolimus	MTOR inhibitor	MTOR|FKBP1A|CCR5|FGF2	-0.3908	2.9409	-1.2055
AZD-4547	FGFR inhibitor	FGF2|FGFR1|FGFR2|FGFR3|FGFR4|IGF1R|KDR	-0.3907	2.9368	-1.2051
gitoxigenin	Na/K-ATPase inhibitor	ATP1A1	-0.3907	2.937	-1.2051
fluspirilene	Dopamine receptor antagonist	DRD2|HTR2A|CACNG1|HRH1|HTR1A|HTR1D|HTR1E	-0.3907	2.9375	-1.2051
flupentixol	Dopamine receptor antagonist	DRD2|DRD1|ADRA1A|CHRM1|DRD3|DRD5|HTR2A	-0.3906	2.9358	-1.205
perampanel	Glutamate receptor antagonist	GRIA1|CYP3A5|GRIA2|GRIA3|GRIA4	-0.3906	2.9347	-1.2049
dasatinib	KIT inhibitor|Bcr-Abl inhibitor|Ephrin inhibitor|PDGFR inhibitor|Src inhibitor|Tyrosine kinase inhibitor	ABL1|FYN|LCK|SRC|KIT|YES1|EPHA2|LYN|PDGFRB|BCR|BTK|DDR1|DDR2|PDGFRA|ABL2|BLK|FGR|FRK|HCK|SRMS|STAT5B	-0.3906	2.9348	-1.2049
vorinostat	HDAC inhibitor	HDAC1|HDAC2|HDAC3|HDAC6|HDAC8|HDAC10|HDAC11|HDAC5|HDAC9	-0.3906	2.9356	-1.2049
mycophenolate-mofetil	Inosine monophosphate dehydrogenase inhibitor|Dehydrogenase inhibitor|Hydroxycarboxylic acid receptor agonist|Immunosuppressant|Inositol monophosphatase inhibitor	IMPDH1|IMPDH2|HCAR2	-0.3906	2.9329	-1.2047
pralatrexate	Dihydrofolate reductase inhibitor	DHFR|SLC19A1|TYMS	-0.3905	2.9296	-1.2044
folic-acid	Folate receptor ligand	FOLR2|FOLR3|SLC19A1|SLC46A1	-0.3904	2.9265	-1.2042
phenethyl-isothiocyanate	Carcinogen	CYP2E1	-0.3904	2.9265	-1.2042
GP-1a	Cannabinoid receptor agonist	CNR2	-0.3904	2.9274	-1.2042
OBAA	Phospholipase inhibitor	PLA2G1B	-0.3903	2.9246	-1.204
PD-198306	MAP kinase inhibitor|MEK inhibitor	MAPK1|MAPK3|MAP2K1|MAP2K2	-0.3903	2.9233	-1.2039
vincamine	Adrenergic receptor antagonist	CHRM1|CHRM2|CHRM3|CHRM4	-0.3903	2.9235	-1.2039
pimecrolimus	Calcineurin inhibitor	FKBP1A|CYP3A5|MTOR	-0.3903	2.9216	-1.2038
purvalanol-a	CDK inhibitor|DYRK inhibitor	CDK1|CDK2|CDK4|CDK5|CCND1|CCNE1|CSNK1G3|RPS6KA1|SRC	-0.3903	2.9223	-1.2038
MLN-4924	Nedd activating enzyme inhibitor	NAE1|UBA3	-0.3902	2.9191	-1.2036
C-646	Histone acetyltransferase inhibitor	EP300	-0.3902	2.9177	-1.2035
IKK-16	IKK inhibitor	IKBKB	-0.3901	2.9165	-1.2034
tofacitinib	JAK inhibitor	JAK3|JAK1|JAK2|CYP2C19|TYK2	-0.3902	2.9173	-1.2034
argatroban	Thrombin inhibitor	F2|CYP3A5	-0.39	2.9119	-1.2031
semaxanib	VEGFR inhibitor	KDR|FLT1|KIT|PDGFRB|FLT3|MET|FGFR1|PDGFRA|RET	-0.39	2.9123	-1.2031
SCH-442416	Adenosine receptor antagonist	ADORA1|ADORA2A	-0.39	2.9104	-1.203
rotundine	Serotonin receptor agonist	DRD1|DRD2|HTR1A|HTR1D|HTR4|HTR7|DRD3	-0.39	2.9104	-1.203
AC-264613	PAR agonist	F2RL1	-0.39	2.9117	-1.203
phentermine	Dopamine receptor antagonist|Serotonin reuptake inhibitor	SLC6A2|MAOA|MAOB|SLC6A3|SLC6A4	-0.39	2.9094	-1.2029
bosutinib	Src inhibitor|Abl inhibitor|Bcr-Abl inhibitor	ABL1|SRC|BCR|LYN|CAMK2G|HCK|CAMK1D|CDK2|FRK|FYN|MAP2K1|MAP2K2|MAP3K2|MAP4K5|STK10|STK24|STK4|TNK2|TXK	-0.39	2.9094	-1.2029
Ro-28-1675	Glucokinase activator	GCK	-0.3899	2.9045	-1.2026
thalidomide	TNF inhibitor	TNF|CRBN|CYP1A2|CYP2B6|CYP2C19|CYP3A5|FGFR2|NFKB1|ORM1|ORM2|PTGS2	-0.3899	2.9046	-1.2026
taselisib	PI3K inhibitor	PIK3CA|PIK3CB|PIK3CD|PIK3CG	-0.3899	2.9058	-1.2026
PIK-93	PI3K inhibitor	PI4KB|PIK3C3|PIK3CG	-0.3898	2.9016	-1.2024
apremilast	Phosphodiesterase inhibitor	PDE4A|PDE4B|PDE4C|PDE4D|TNF|TNFRSF1A	-0.3897	2.8988	-1.2022
WYE-125132	MTOR inhibitor	MTOR|PIK3CA	-0.3898	2.8995	-1.2022
sertraline	Serotonin receptor antagonist	SLC6A4|CYP2C19|SLC6A3	-0.3897	2.8975	-1.2021
PD-173074	FGFR inhibitor|VEGFR inhibitor	FGFR1|FGFR3|FGFR2|FGFR4|FLT1|FLT4|KDR|PDGFRA|PDGFRB	-0.3896	2.8924	-1.2018
dapagliflozin	Sodium/glucose cotransporter inhibitor	SLC5A2|SLC5A1	-0.3896	2.8927	-1.2018
tenovins	SIRT inhibitor|p53 activator	SIRT1|SIRT2	-0.3896	2.8912	-1.2017
MST-312	Telomerase inhibitor	TERT	-0.3895	2.8876	-1.2015
voxtalisib	MTOR inhibitor|PI3K inhibitor	MTOR|PIK3CA	-0.3894	2.8834	-1.2012
entinostat	HDAC inhibitor	HDAC1|HDAC2|HDAC3|HDAC9	-0.3894	2.8817	-1.2011
brequinar	Dihydroorotate dehydrogenase inhibitor	DHODH	-0.3893	2.8784	-1.2009
pheniramine	Histamine receptor antagonist	HRH1	-0.3893	2.8742	-1.2007
neratinib	EGFR inhibitor	EGFR|ERBB2|ERBB4|KDR	-0.3893	2.8752	-1.2007
epirubicin	Topoisomerase inhibitor	TOP2A|CHD1	-0.3892	2.8724	-1.2006
WAY-170523	Metalloproteinase inhibitor	MMP13	-0.3892	2.8731	-1.2006
RG-7388	MDM inhibitor	MDM2|TP53	-0.3891	2.8678	-1.2003
[truncated: 36,518 more rows]
